# Supplementary material for: (Pd/C-mediated)coupling–iodocyclization–coupling strategy in discovery of novel PDE4 inhibitors: a new synthesis of pyrazolopyrimidines
Source: Royal Society of Chemistry journal article supplement (doi:10.1039/c2md00273f), 2012-01-01
Supplement: c2md00273f_2.pdf [file c2md00273f_2.pdf]

# Copies of NMR spectra

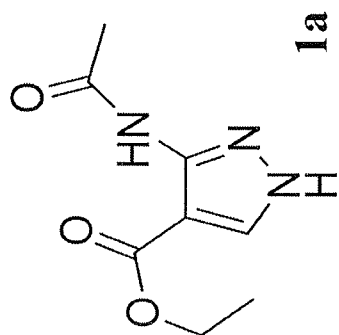

NMR-400 in CDCl<sub>3</sub>  
AR.NO:ME1210/54  
Date: 1st Dec. 2010

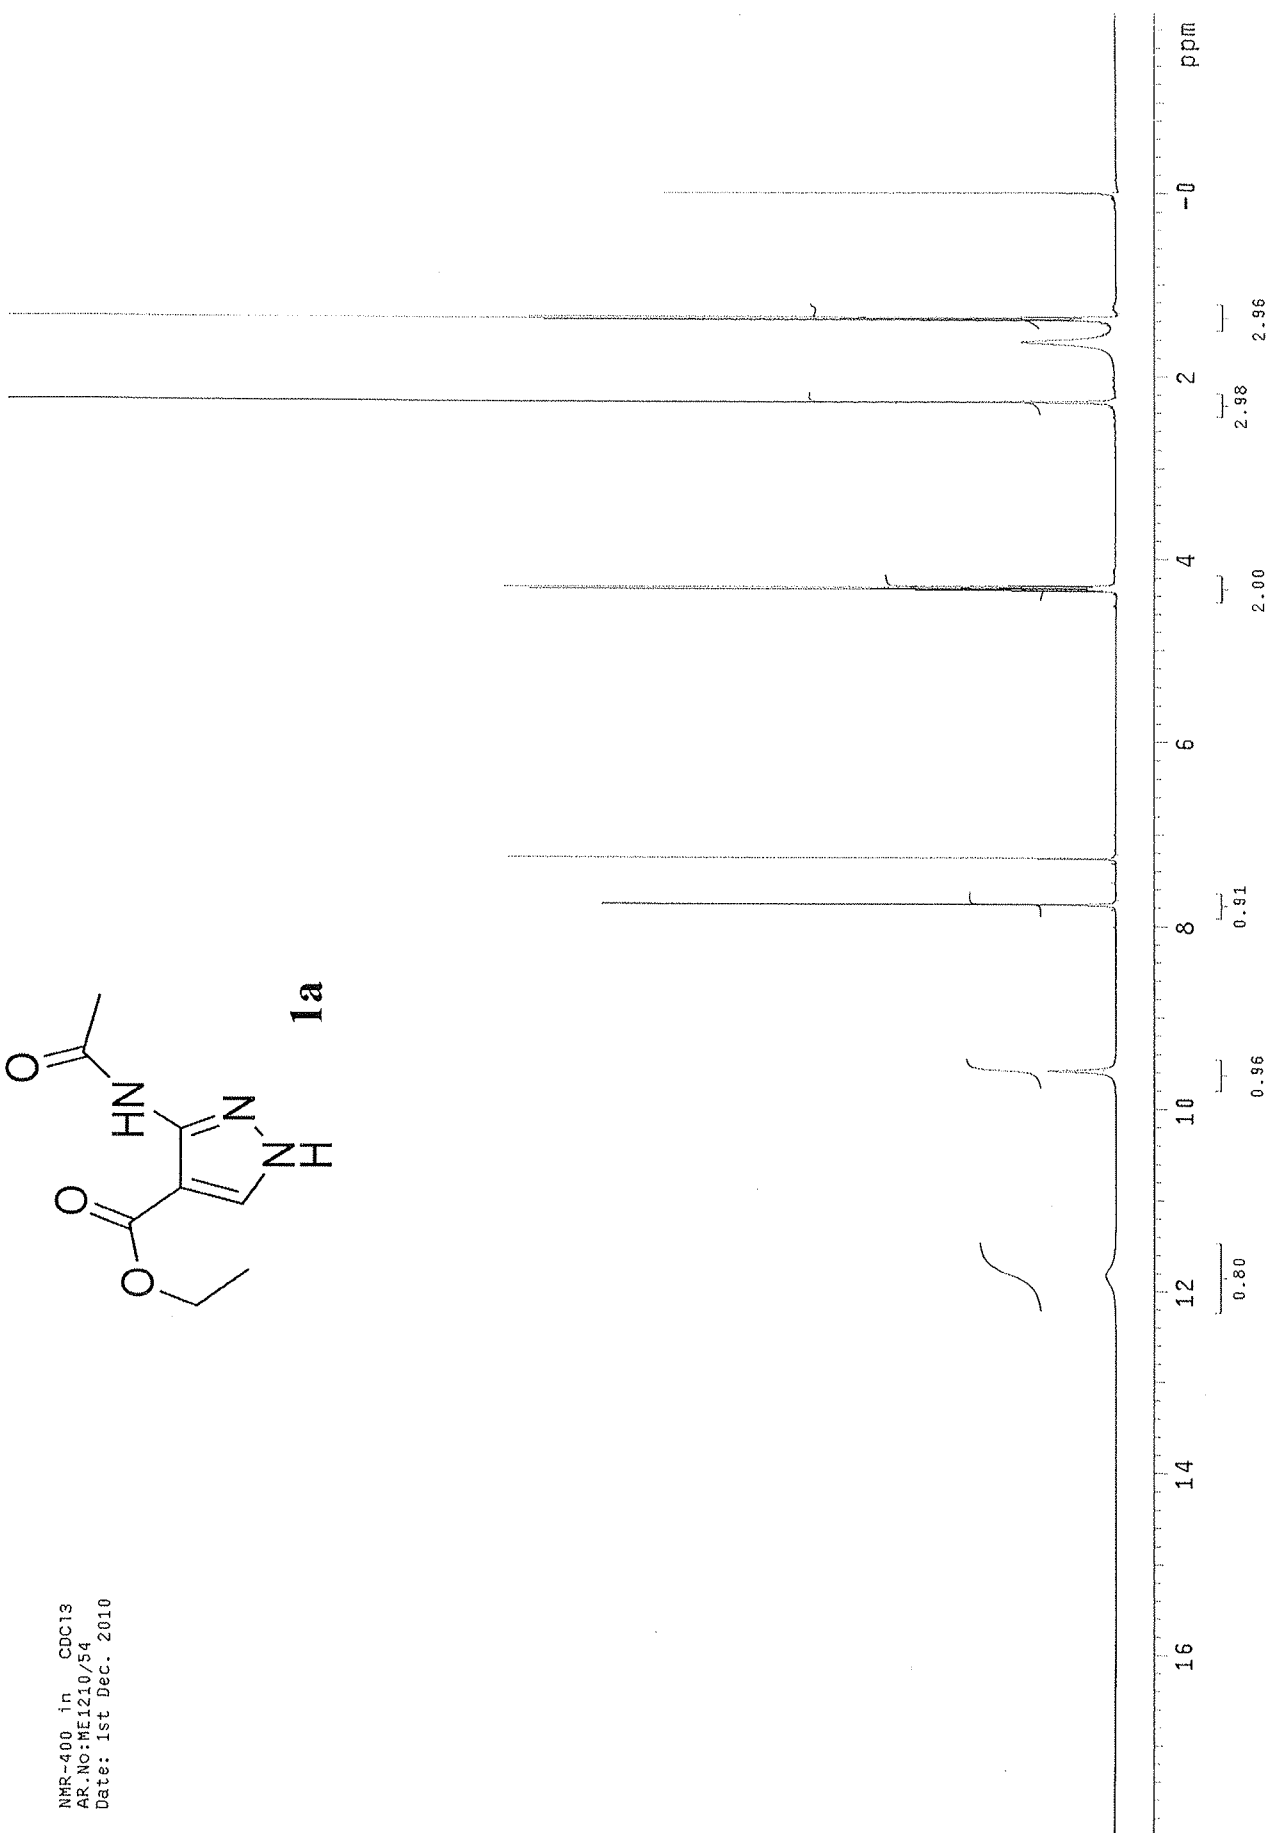

### Copies of NMR spectra

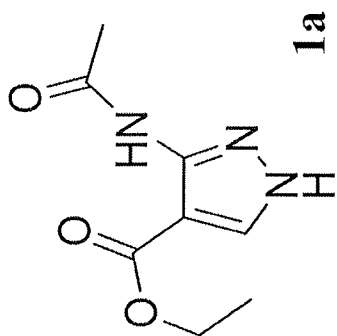

NMR-400 in DMSO  
AR.No:ME1210/125  
Date: 1st Dec. 2010

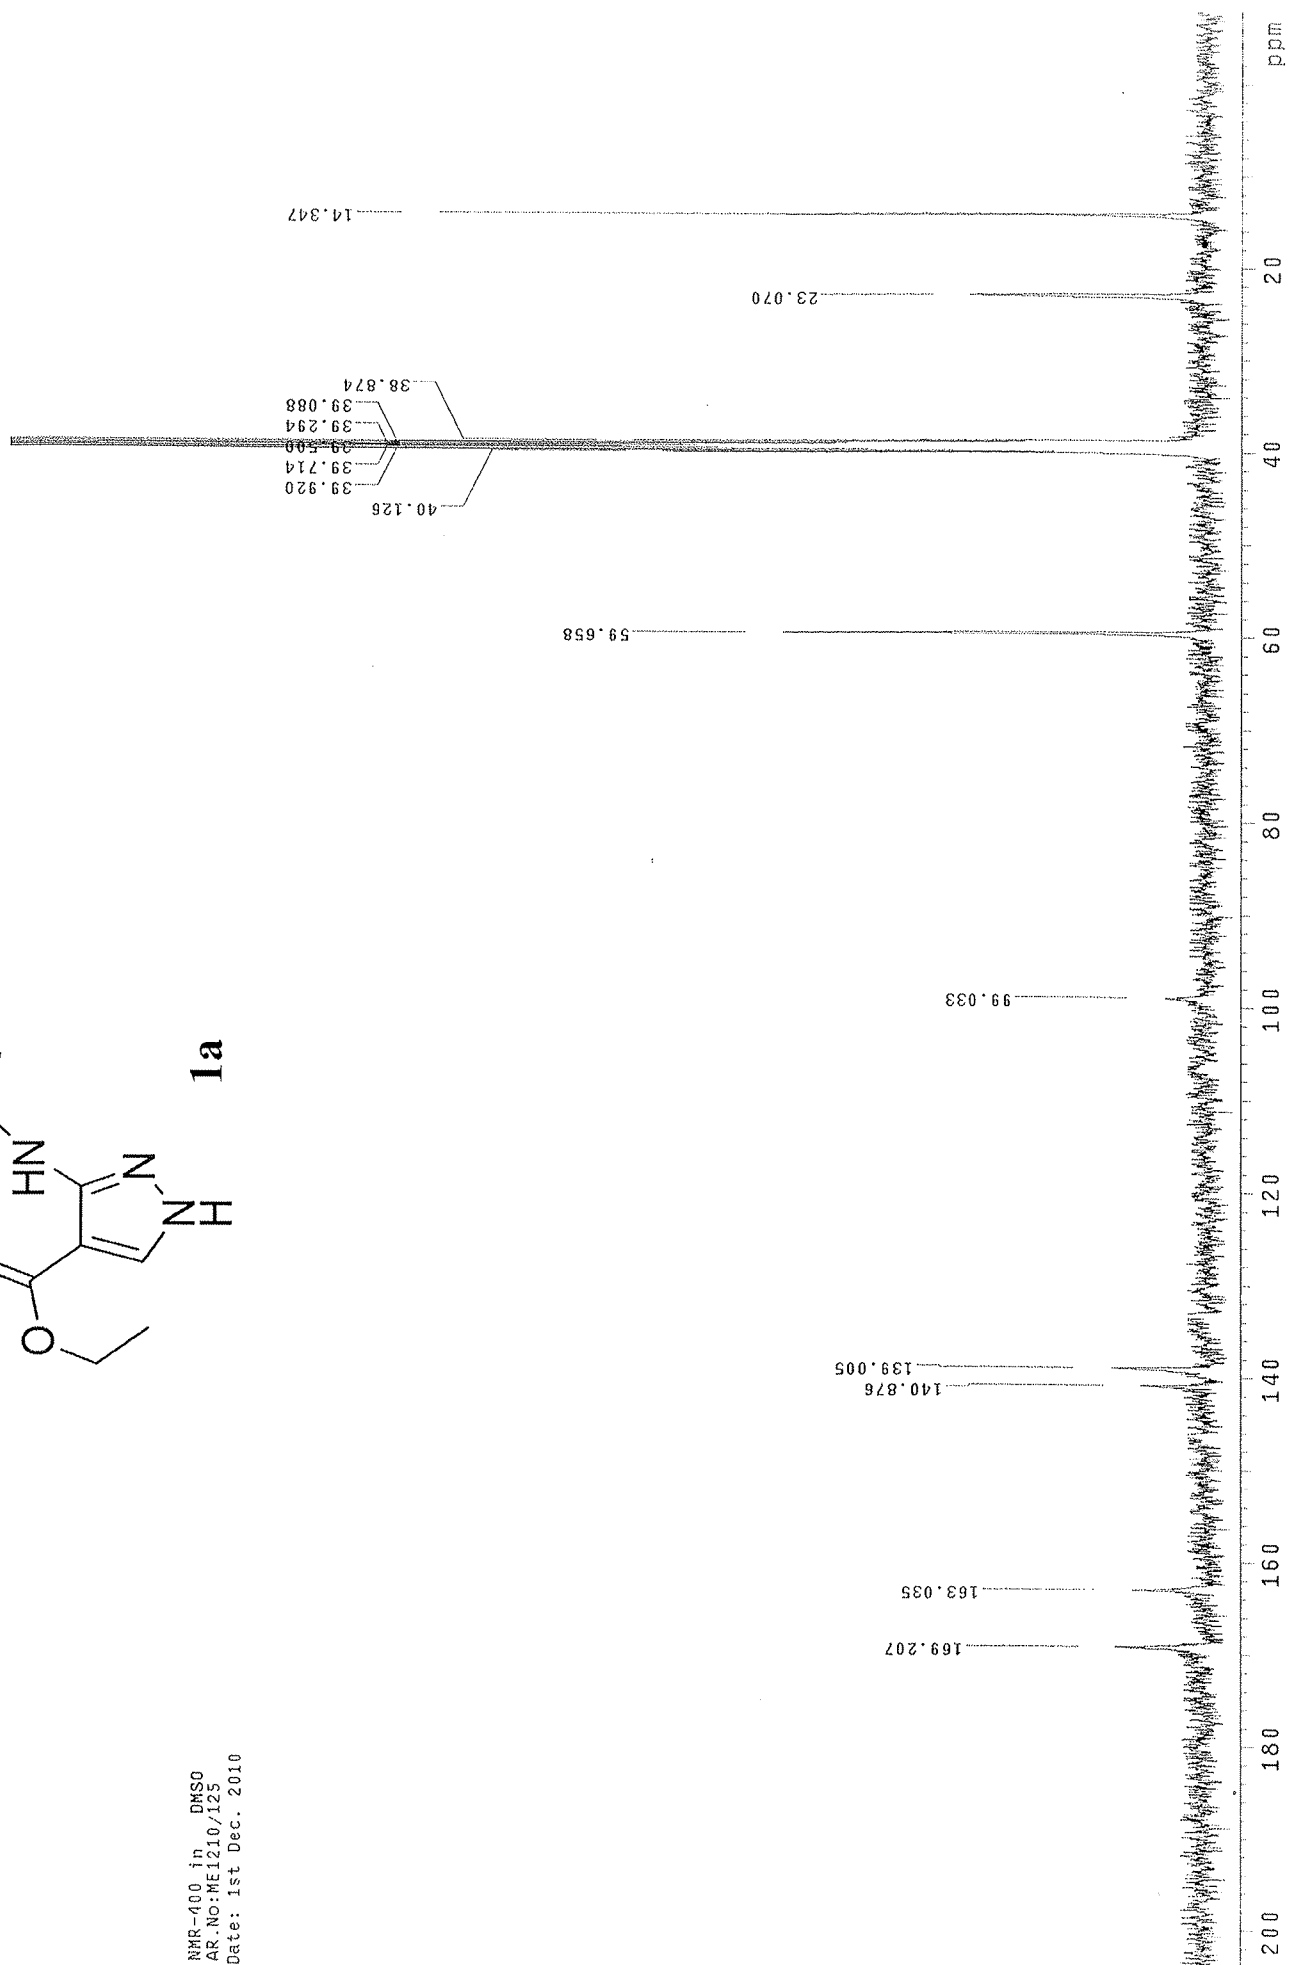

# Copies of NMR spectra

AR&D, Aurigene Discovery Technologies Ltd, Hyderabad  
Instrument : Mercury Plus (Varian 400MHz)  
Date & Time : Fri Mar 5 10:08:33 IST 2010  
Recorded By : Saikanth.A

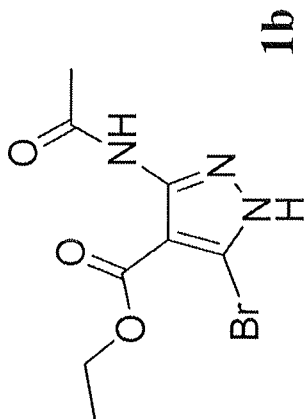

DMSO  
AR.No:ME0310/309  
Date:5th March 2010

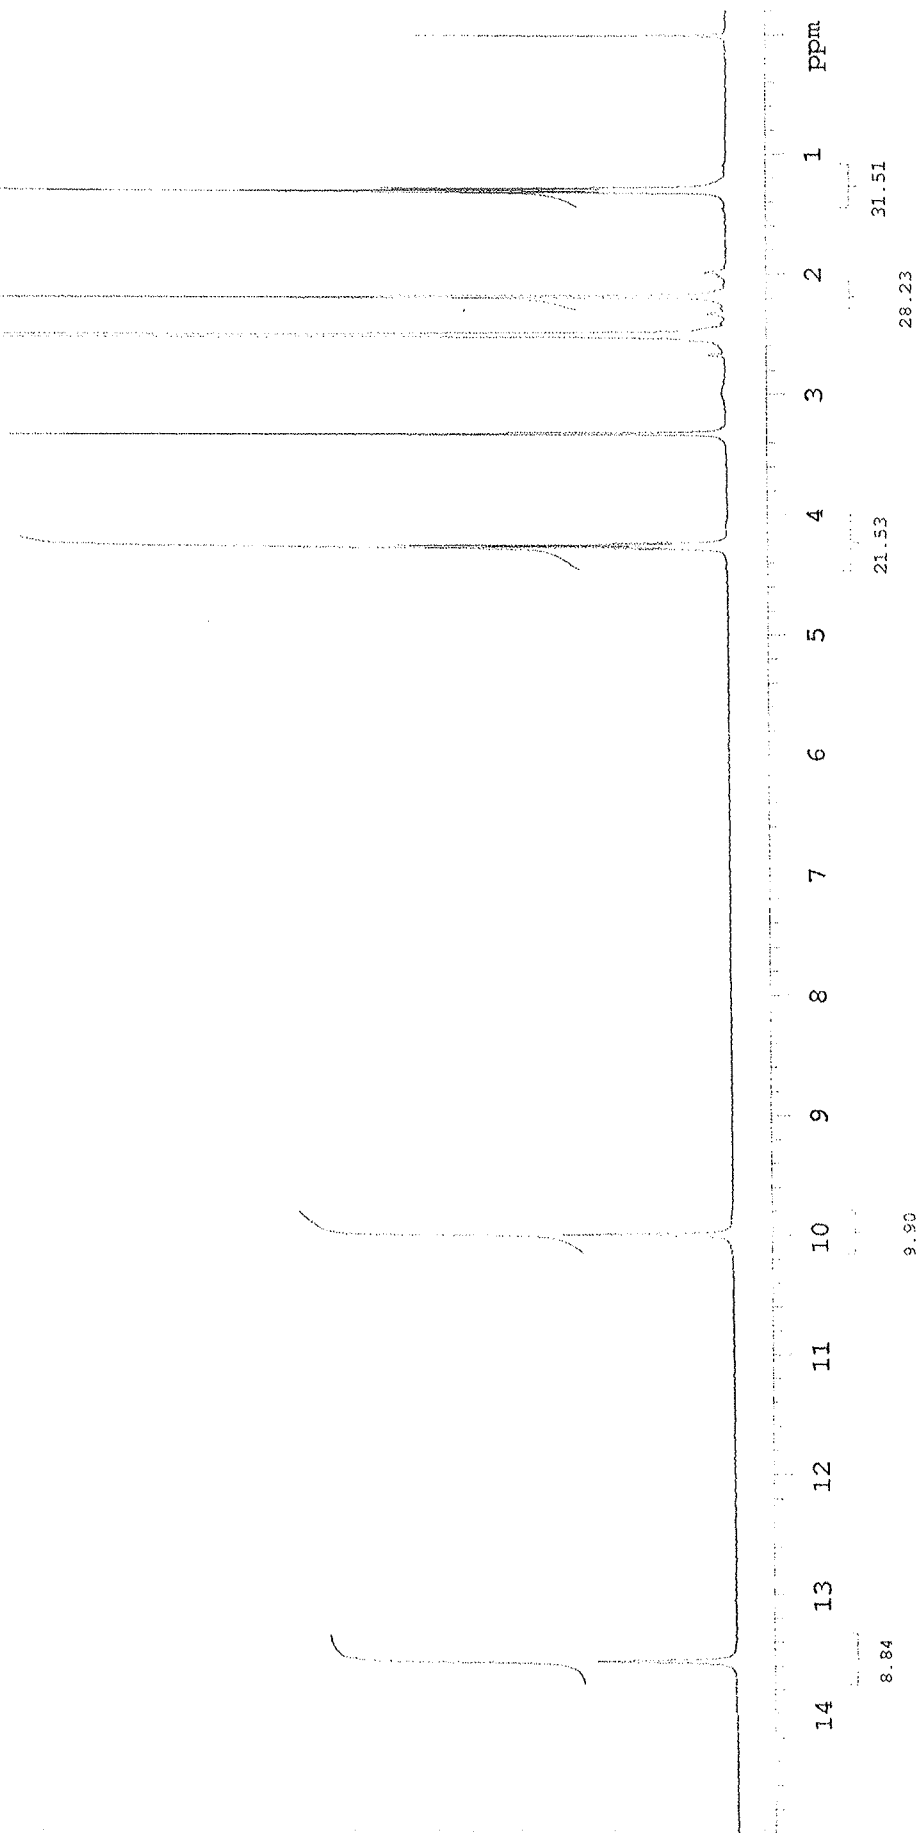

# Copies of NMR spectra

AR&D, Aurigene Discovery Technologies Ltd, Hydera  
Instrument : Gemini 2000 (Varian 200MHz)  
Date & Time : Fri Dec 3 14:46:04 GMT 2010  
Recorded By : Haribabu.R

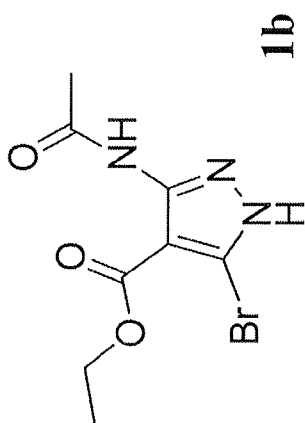

DMSO  
AR NO:CE1210/06  
Date: 03 rd Dec. 2010

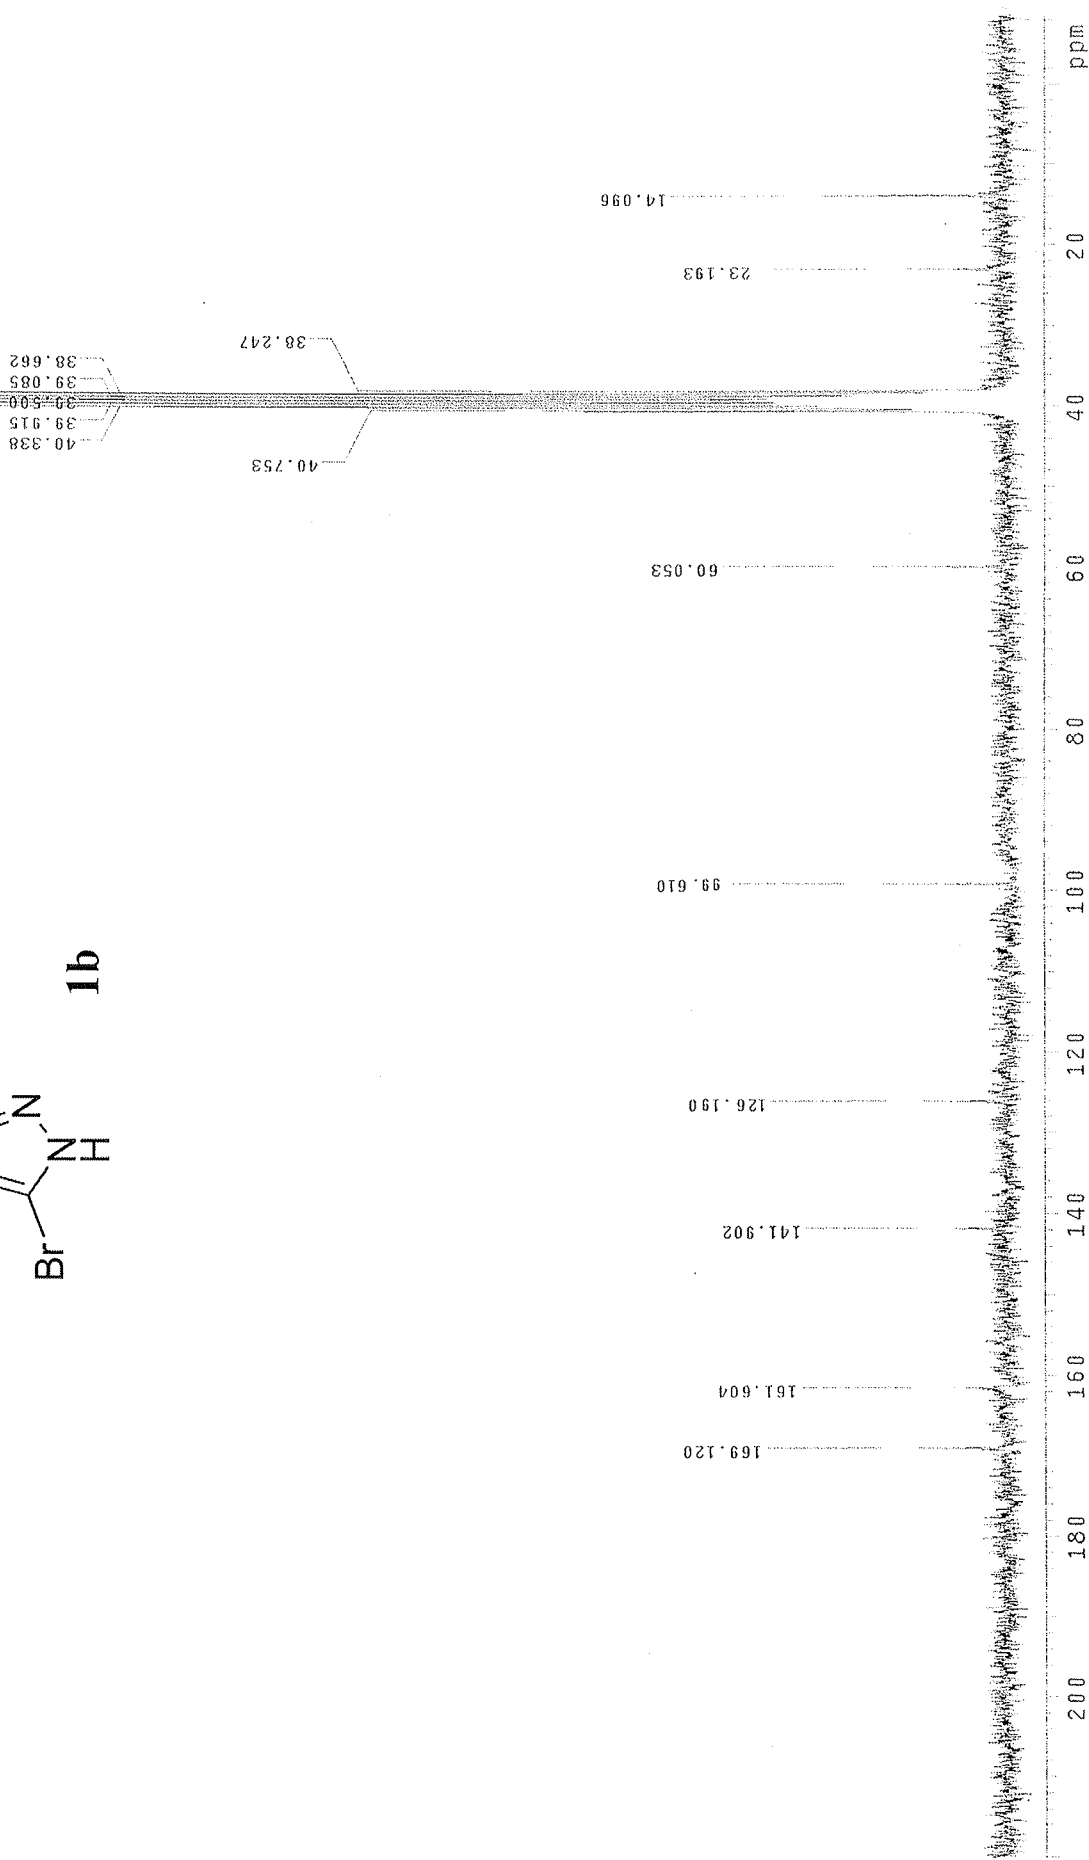

Copies of NMR spectra

AR&D, Aurigene Discovery Technologies Ltd, Hyderabad  
Instrument : Mercury Plus (Varian 400MHz)  
Date & Time : Fri Mar 5 10:10:50 IST 2010  
Recorded By : Srikanth.A

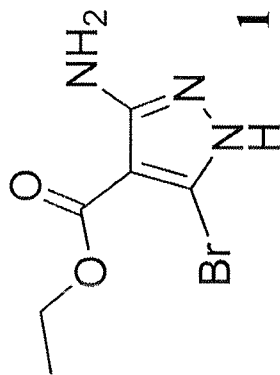

DMSC  
AR.No:ME0310/310  
Date:5th March 2010

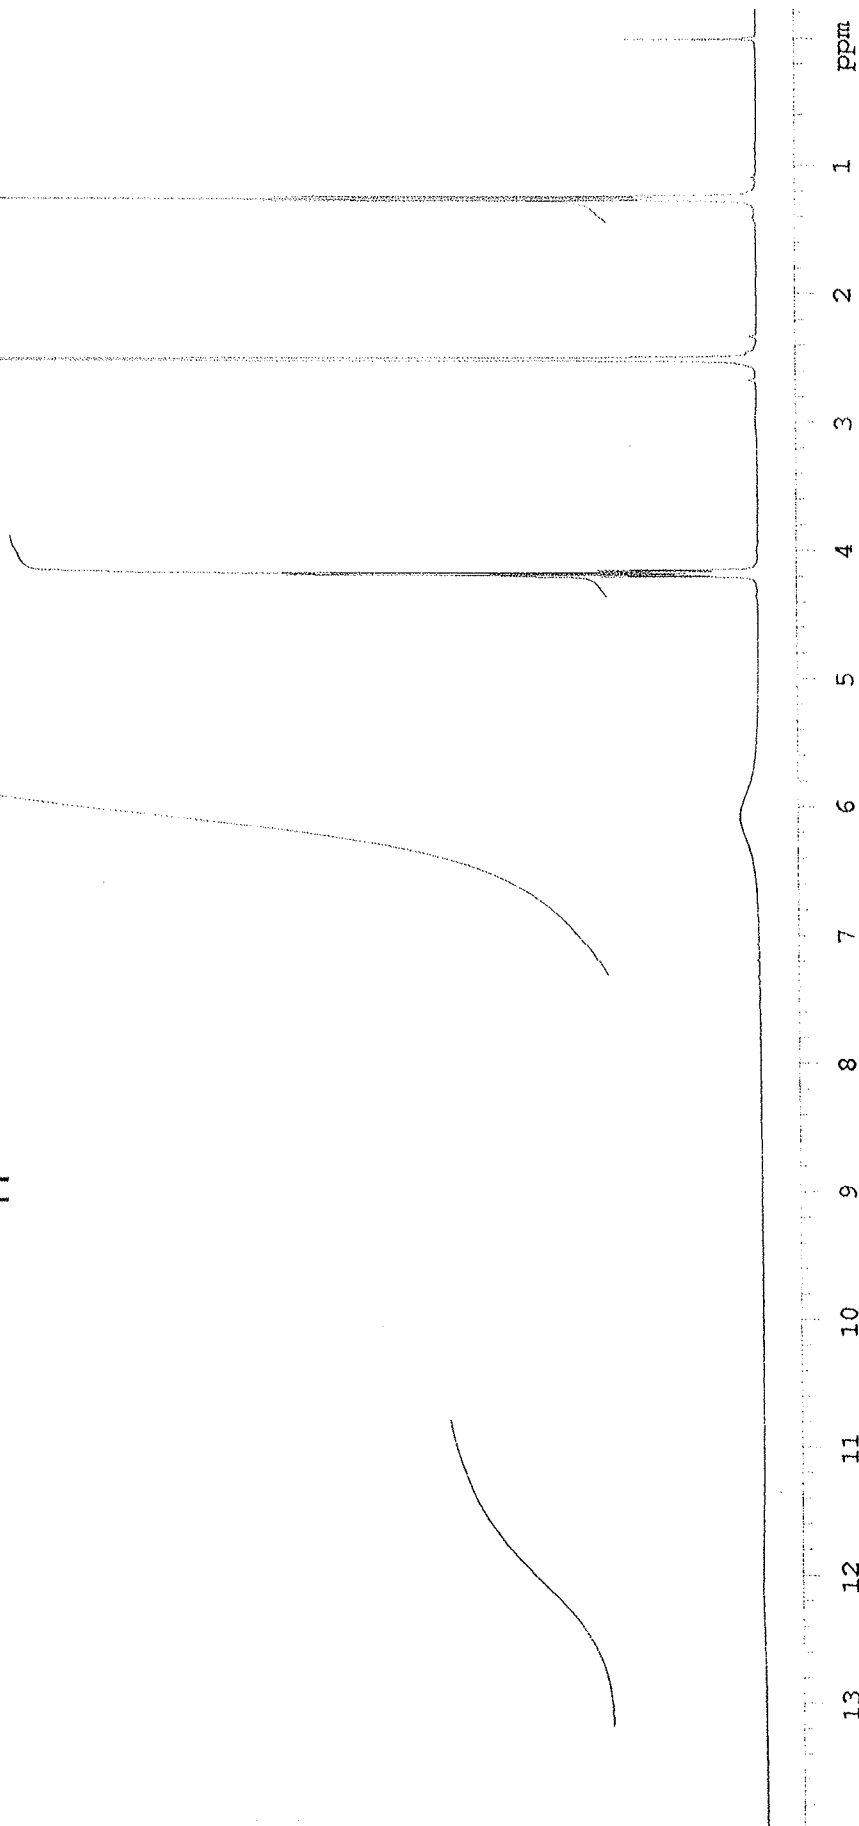

6.51  
8.51  
9.51  
10.51  
11.51  
12.51  
13.51  
24.18  
32.71  
36.61

### Copies of NMR spectra

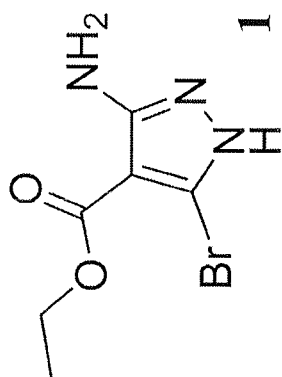

NMR-400 in DMSO  
AR.No:ME1210/126  
Date: 1st Dec. 2010

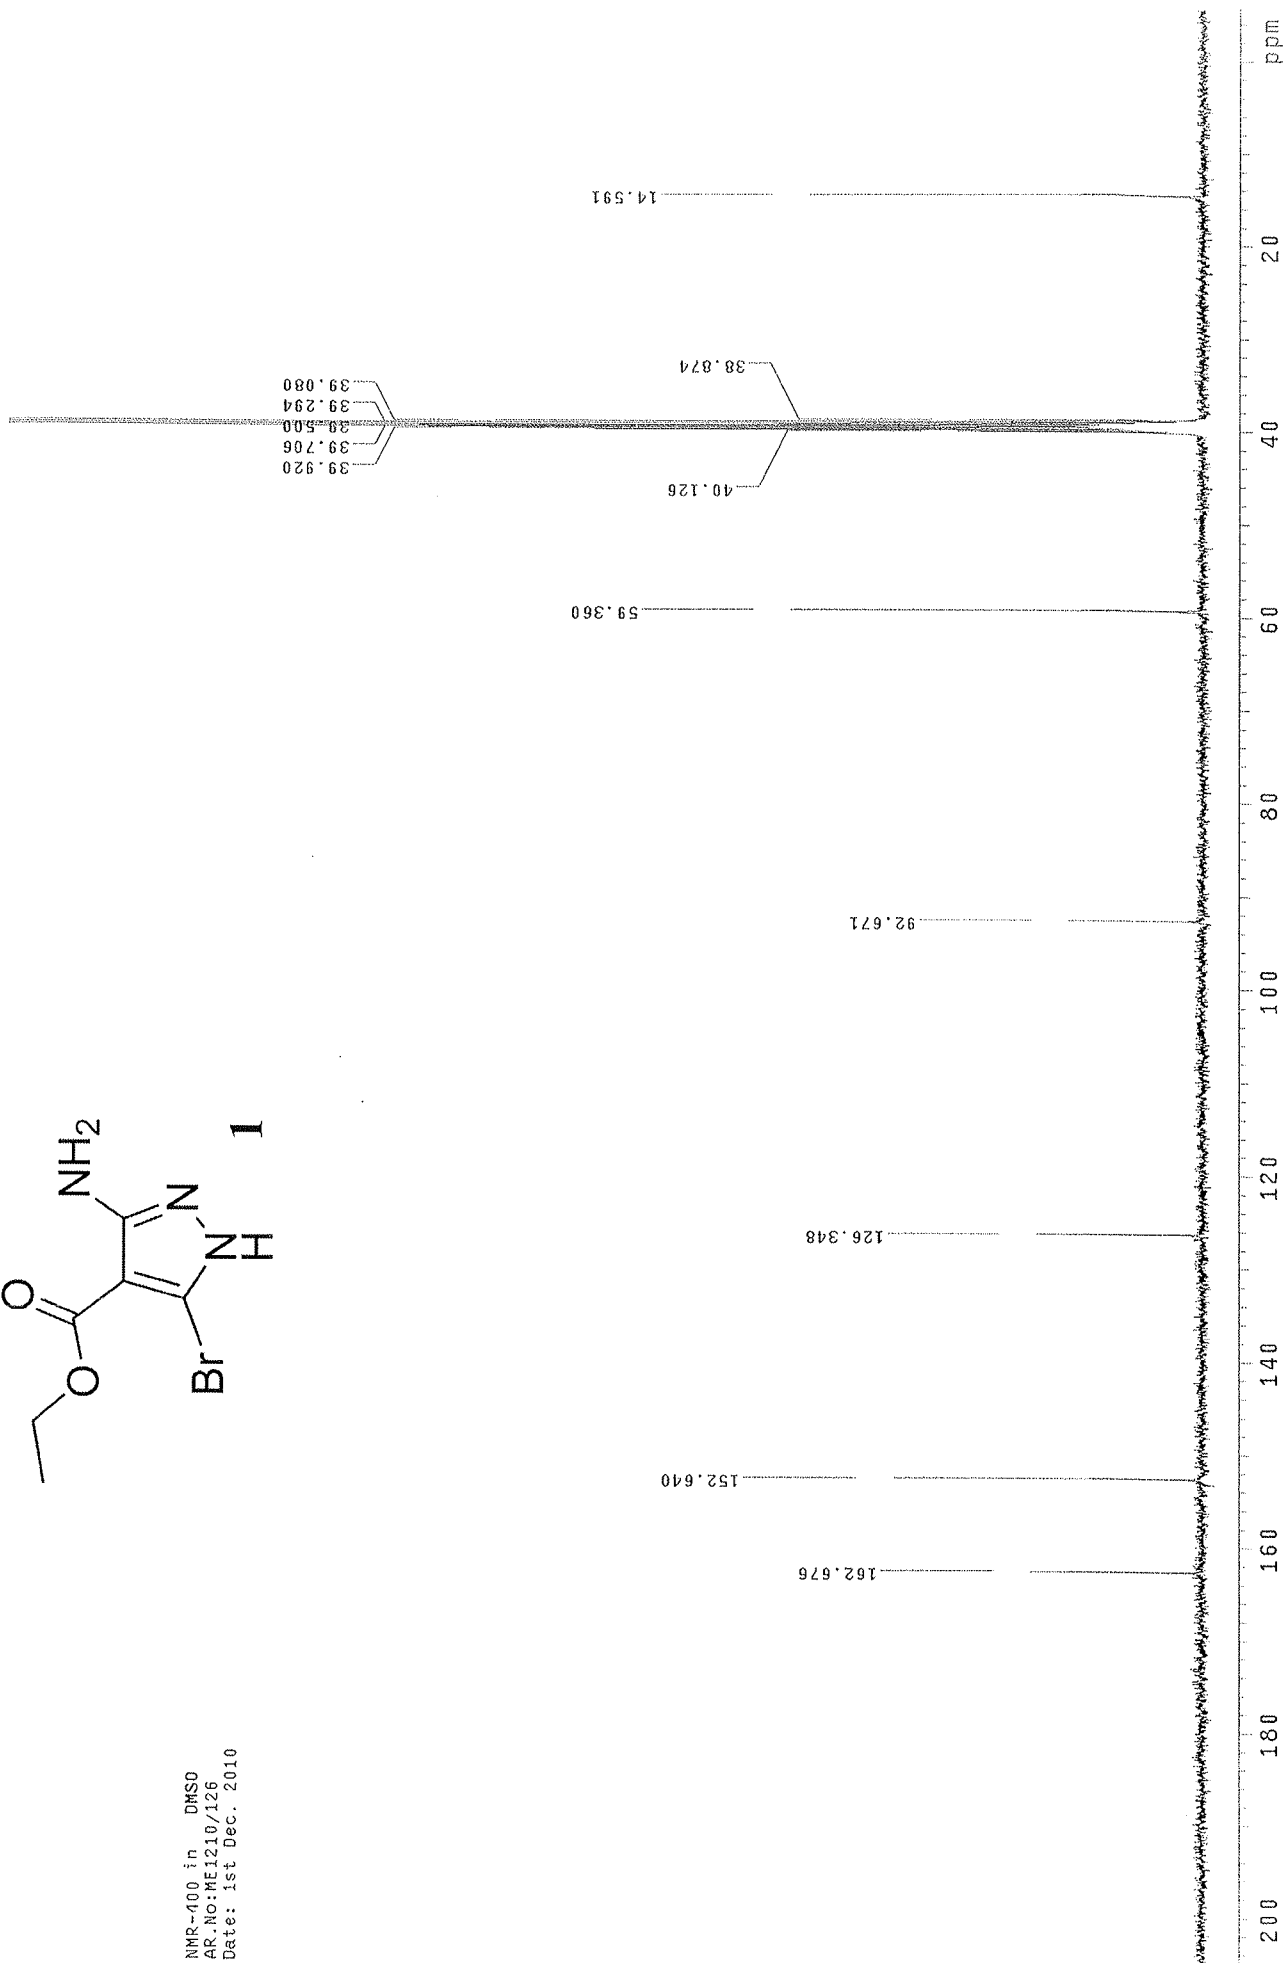

# Copies of NMR spectra

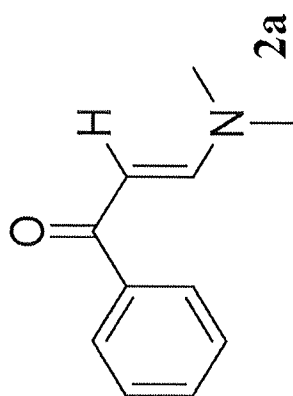

NMR-400 in CDCl<sub>3</sub>  
AR.No:ME1110/1378  
Date: 18 th Nov 2010

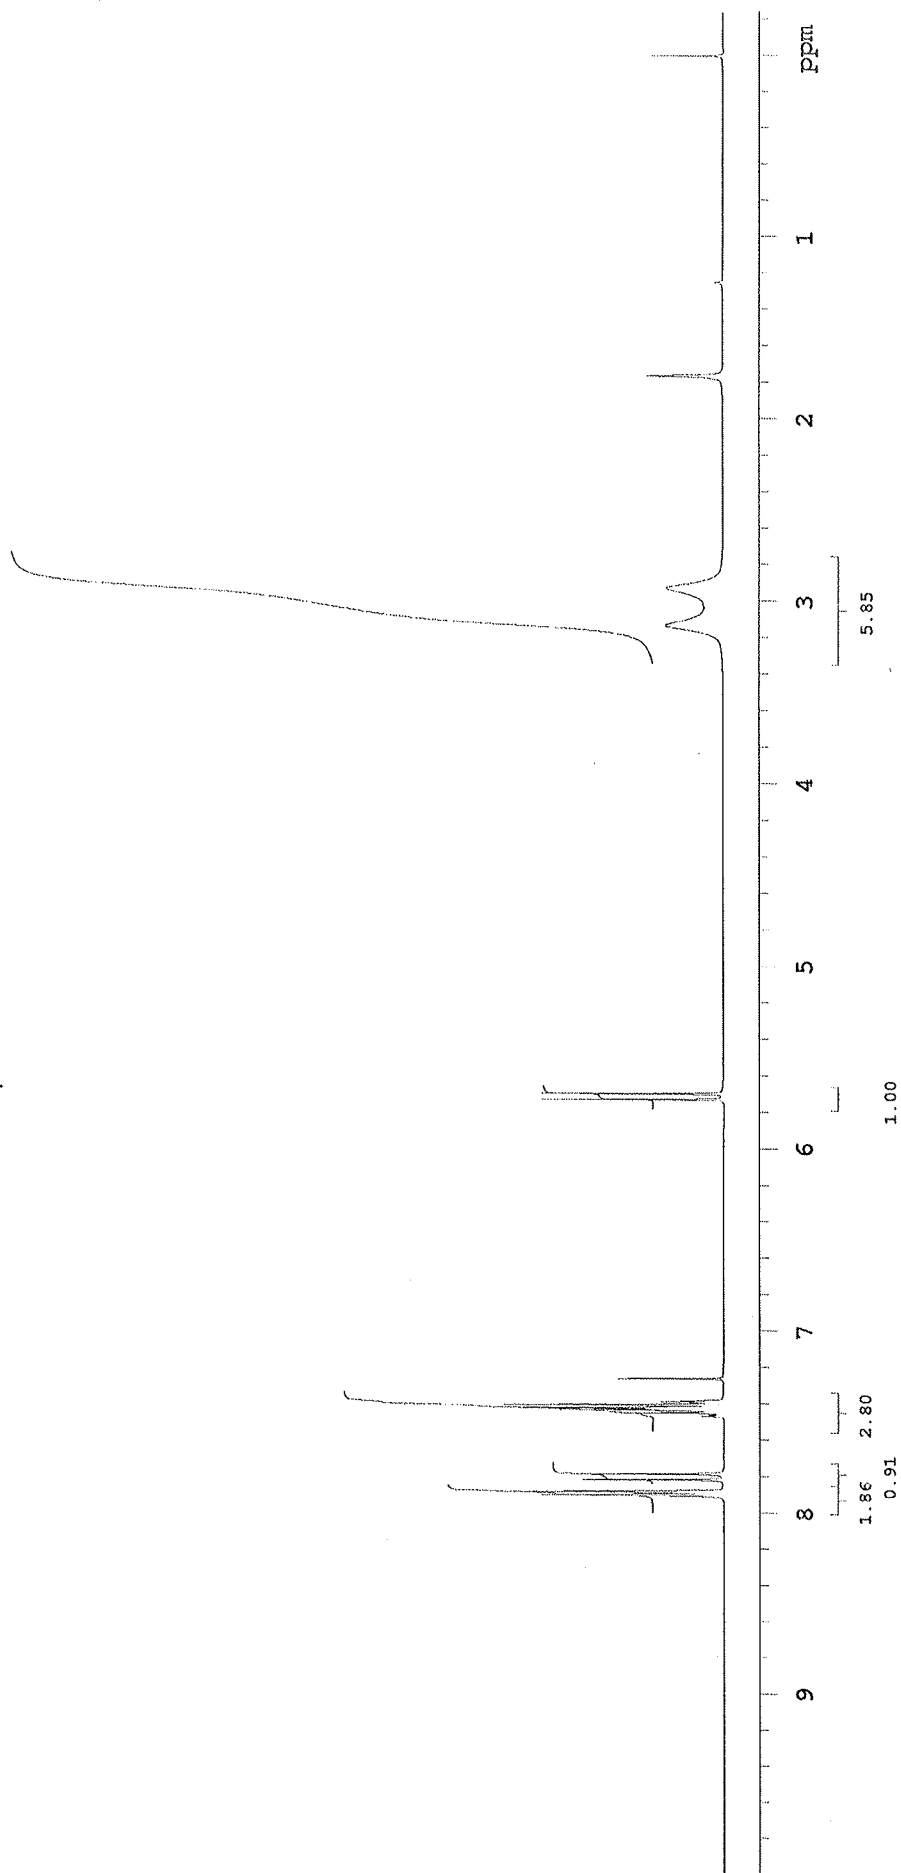

### Copies of NMR spectra

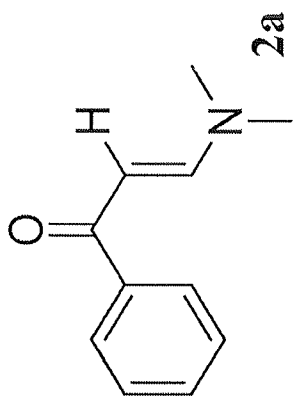

NMR-400 in DMSO  
AR\_No:ME1210/544  
Date: 6 th Dec. 2010

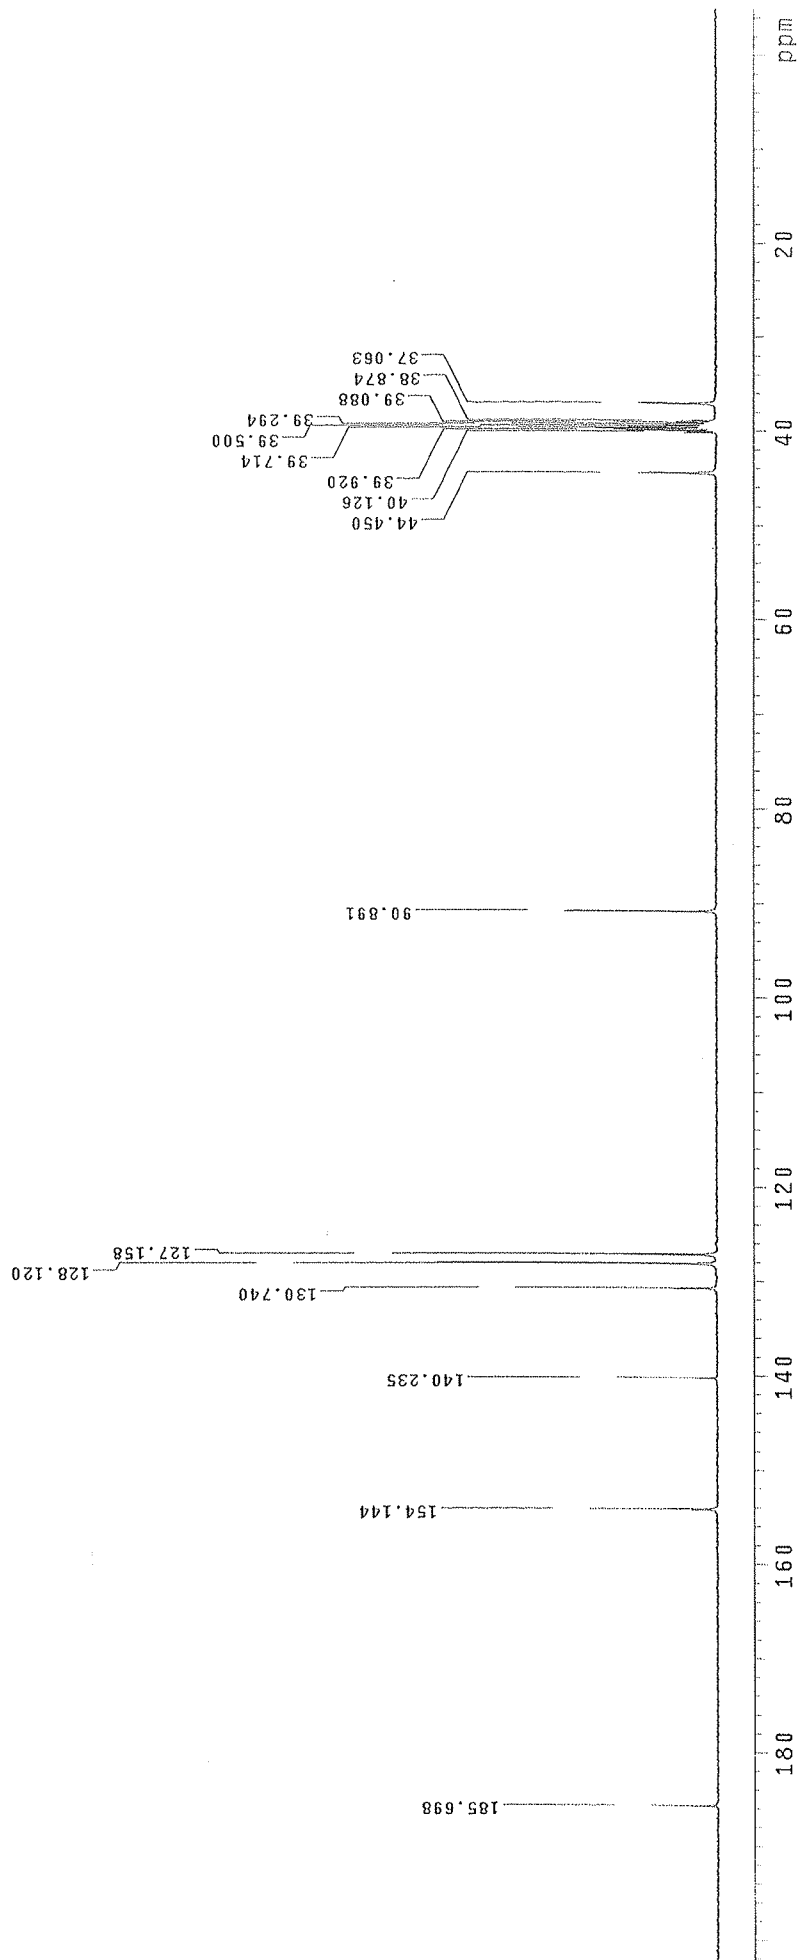



# Copies of NMR spectra

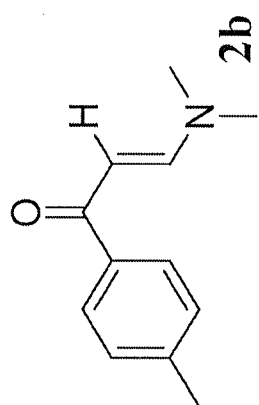

NMR-400 in CDCl<sub>3</sub>  
AR.No:ME1010/1436  
Date: 18 th Oct 2010

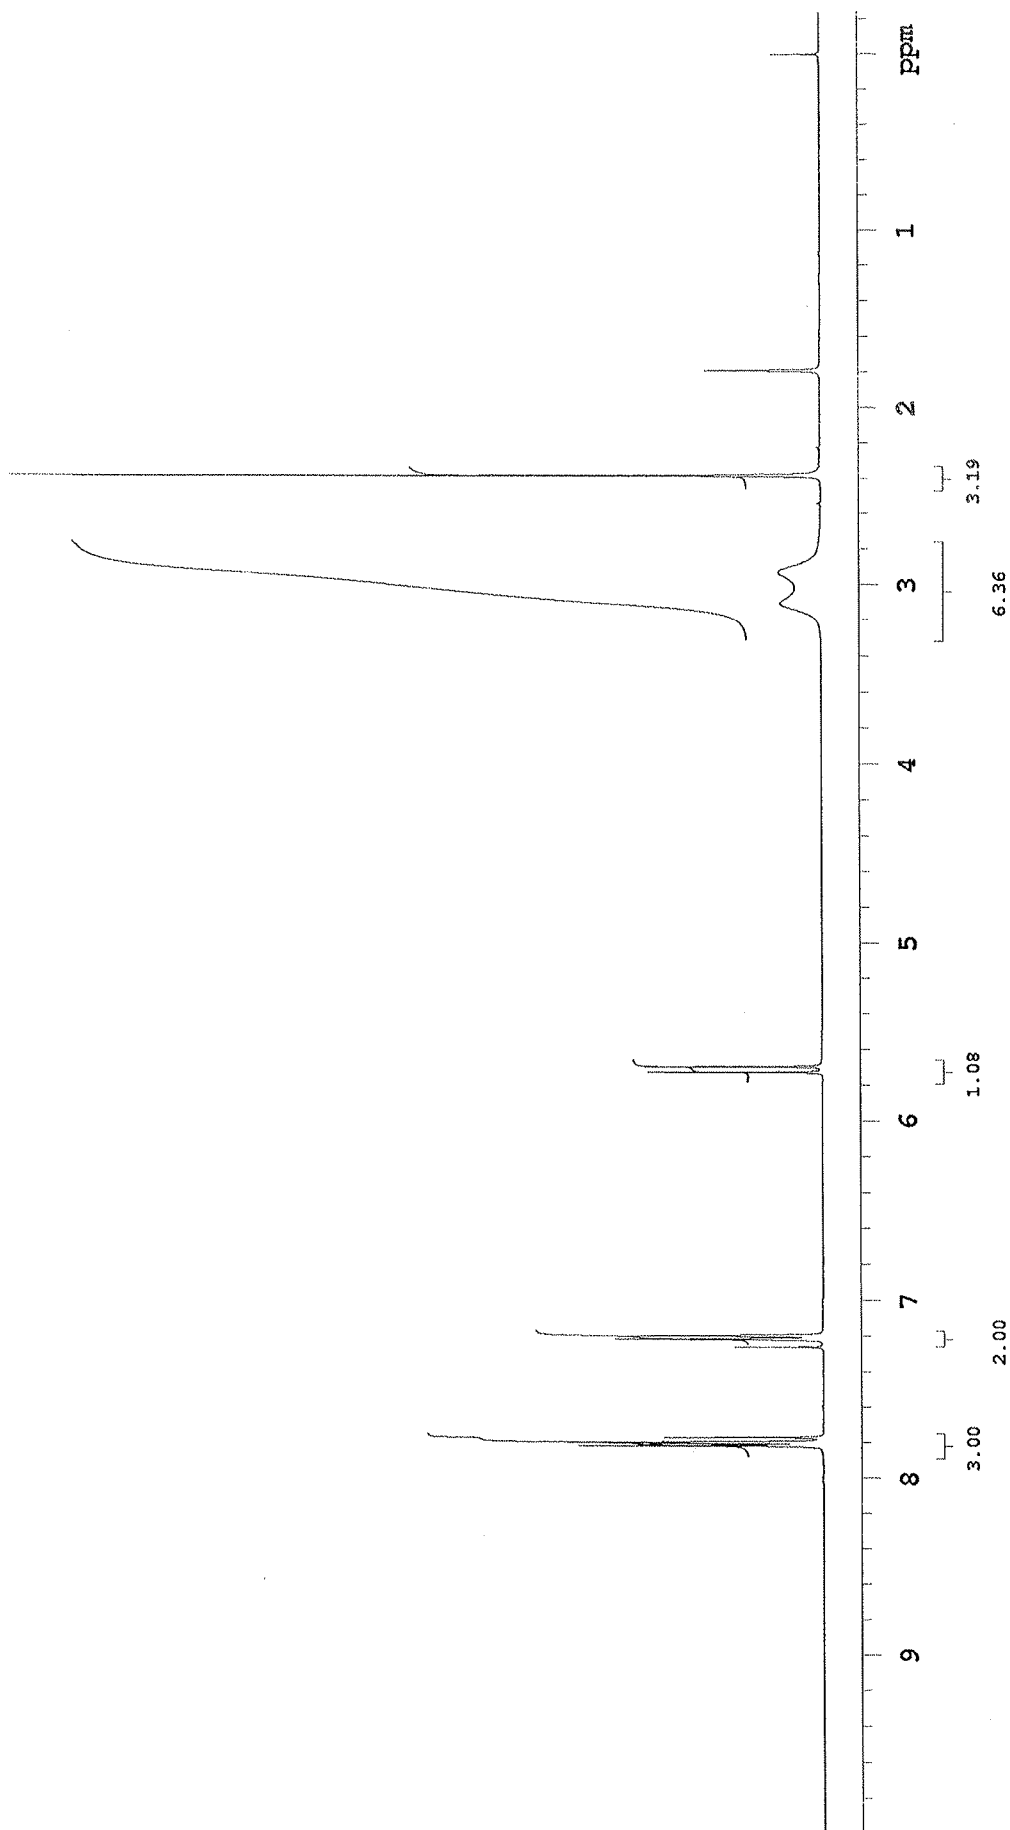

# Copies of NMR spectra

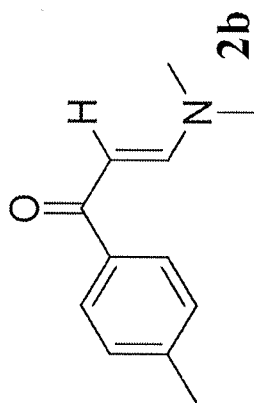

NMR-400 in CDCl<sub>3</sub>  
AR.NO:ME1210/127  
Date: 1st Dec. 2010

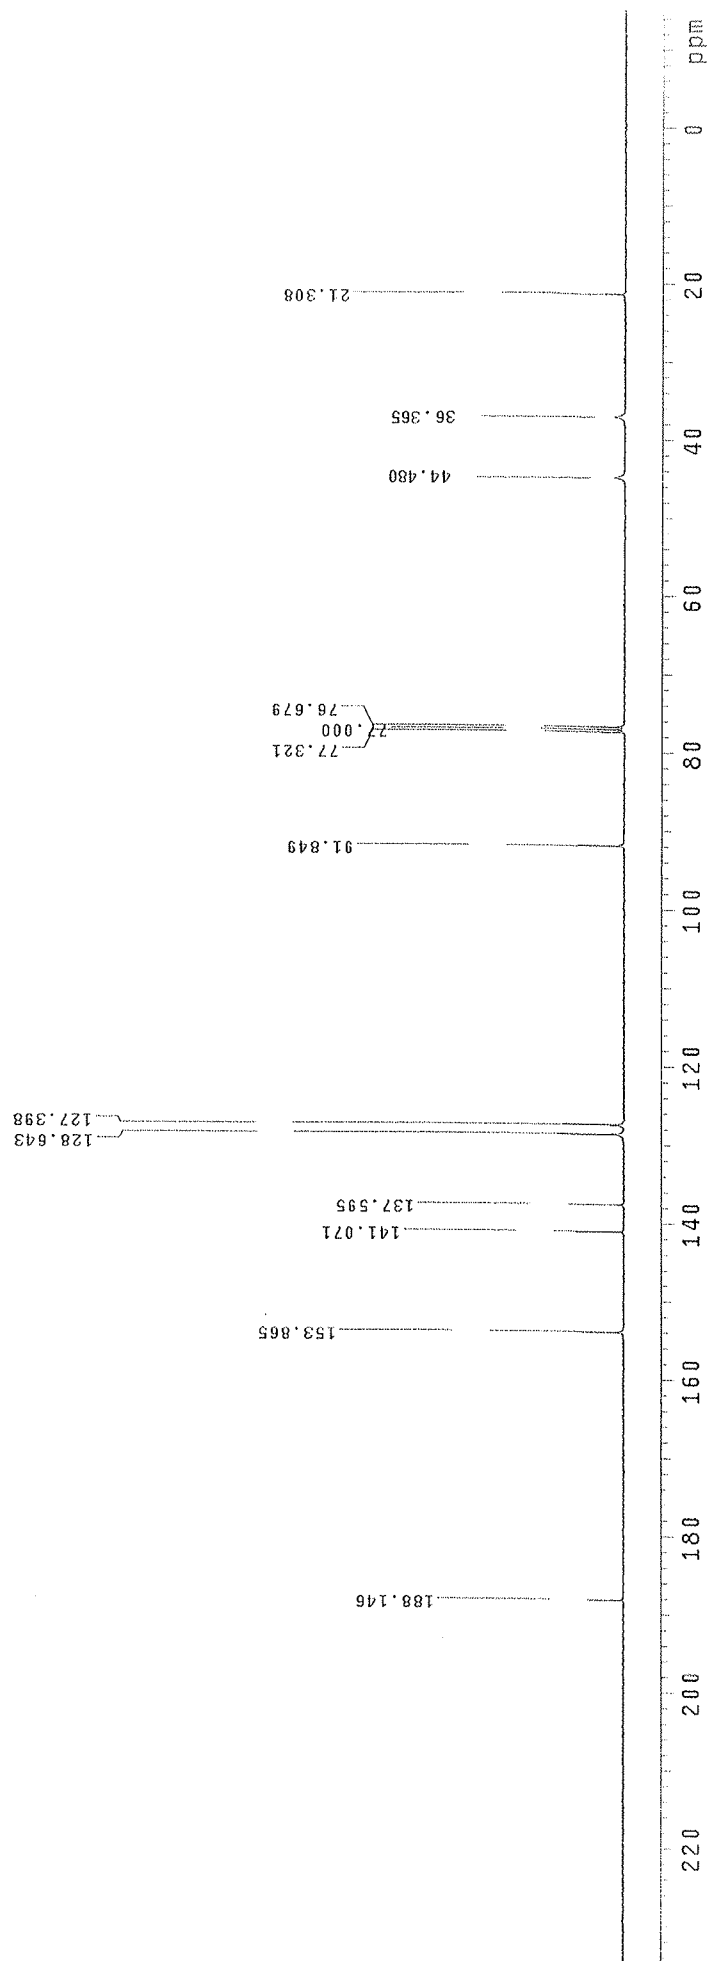

### Copies of NMR spectra

NMR-400 in CDCl3  
AR.No:ME1110/1820  
Date: 25<sup>th</sup> Nov 2010

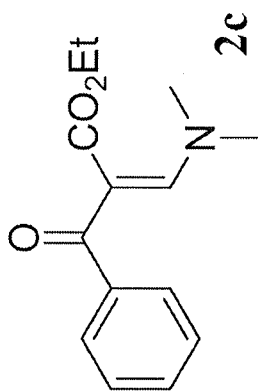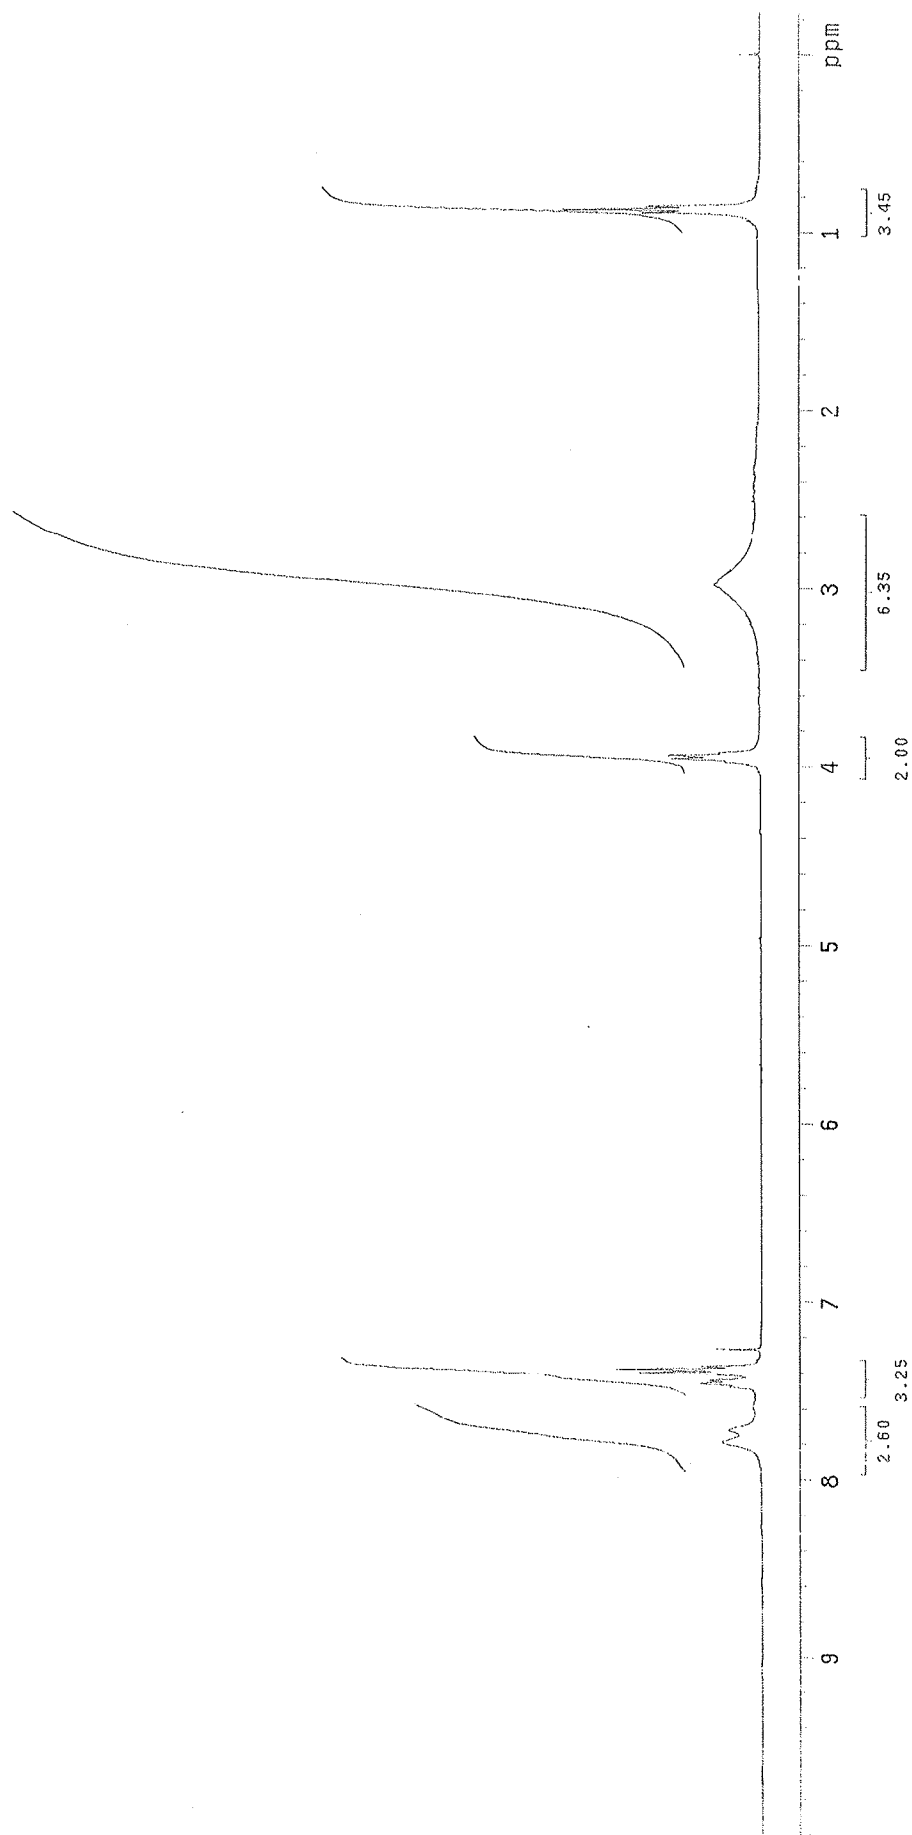

### Copies of NMR spectra

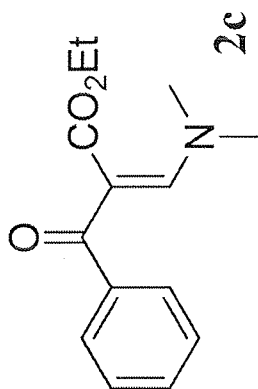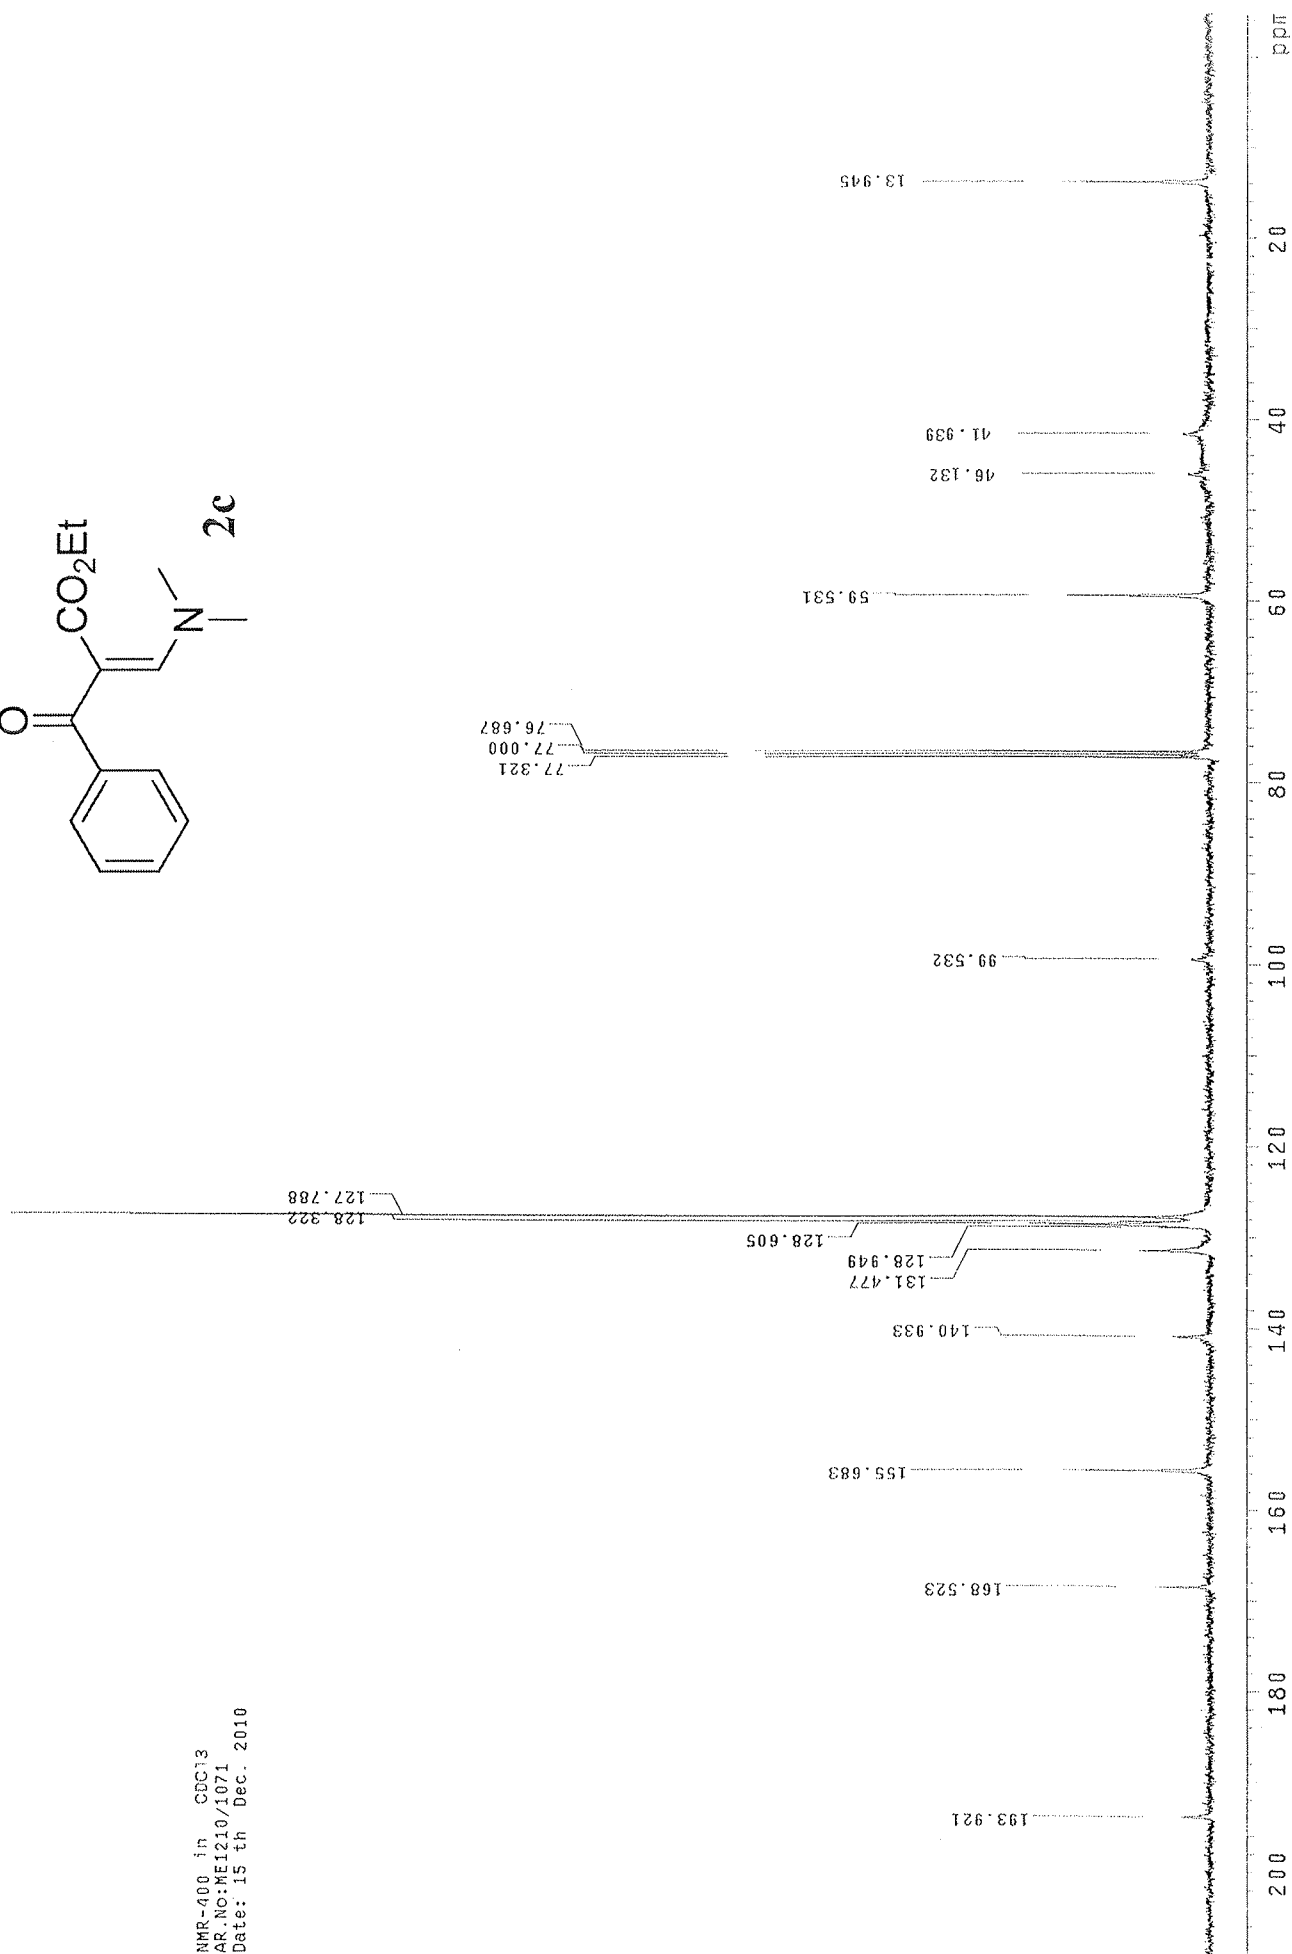

NMR-400 in CDCl<sub>3</sub>  
AR.NO:ME1210/1071  
Date: 15 th Dec. 2010

### Copies of NMR spectra

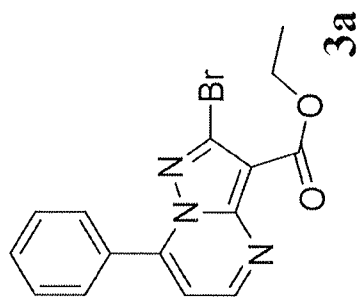

NMR-400 in CDCl<sub>3</sub>  
AR.No:ME1010/1439  
Date: 18 th Oct 2010

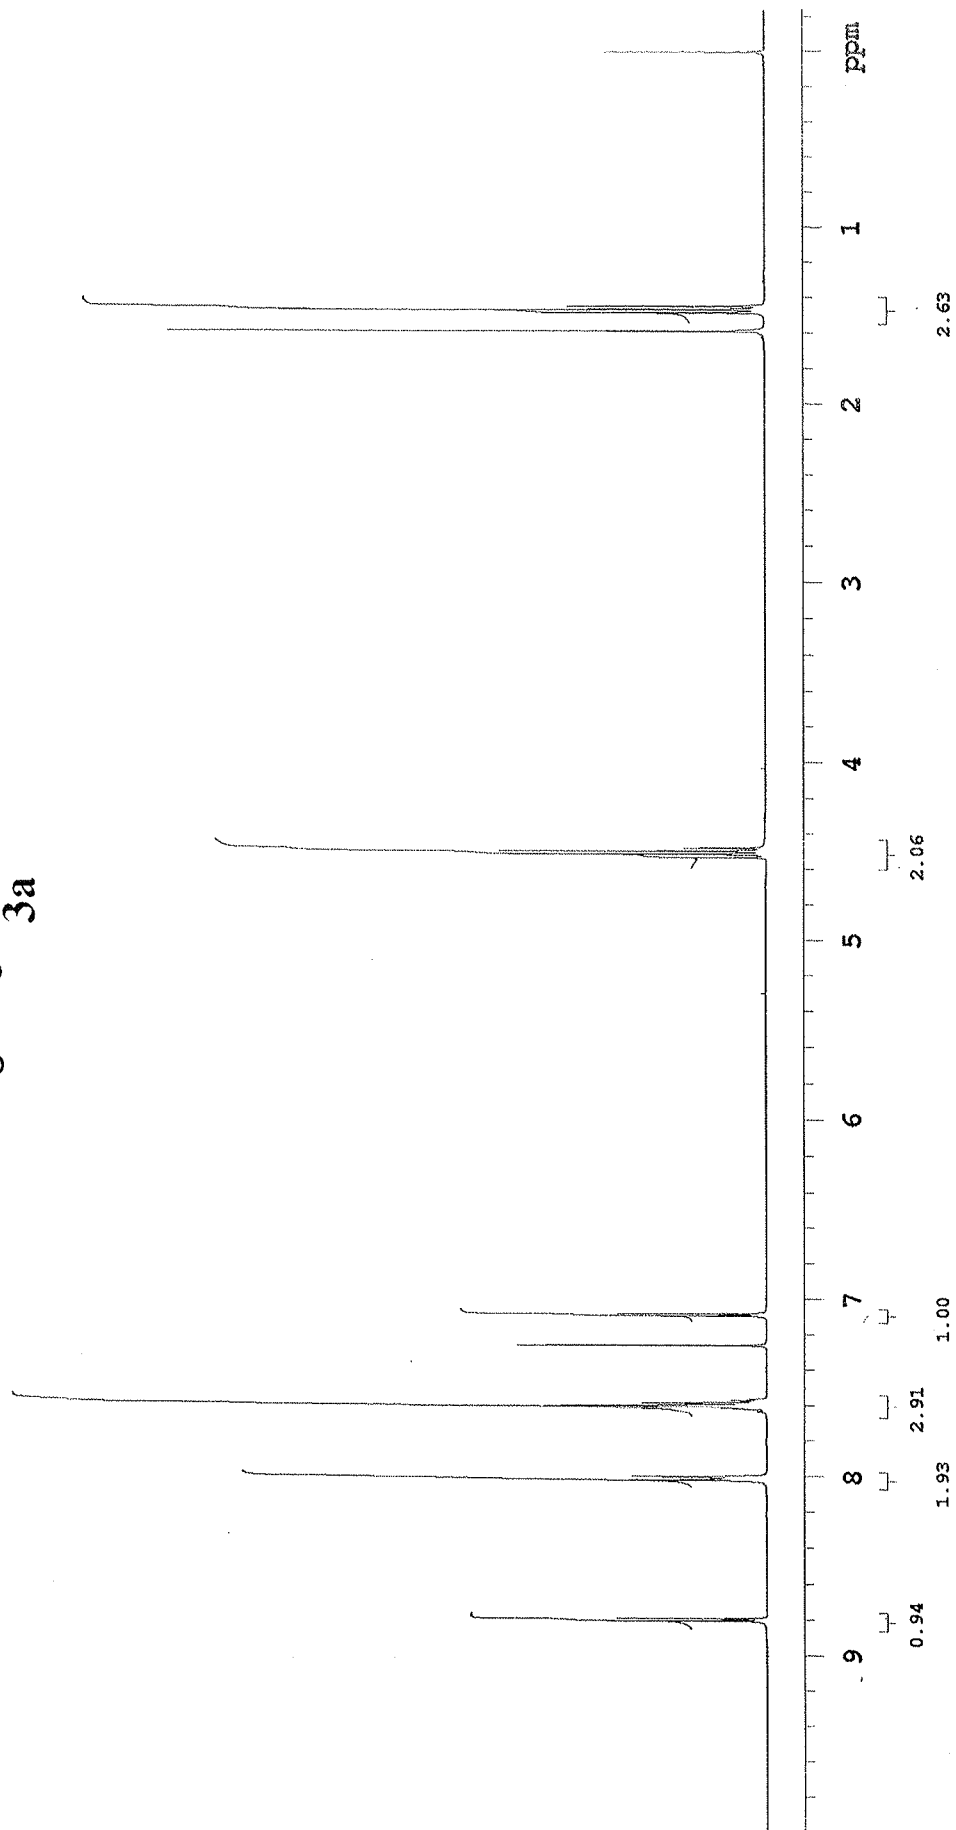

### Copies of NMR spectra

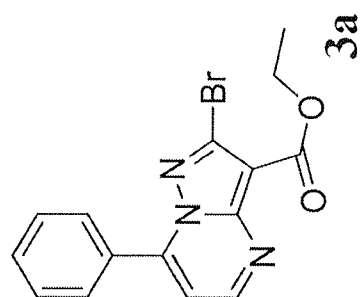

NMR-400 in CDCl<sub>3</sub>  
AR.No:ME1010/1341  
Date: 15 th Oct 2010

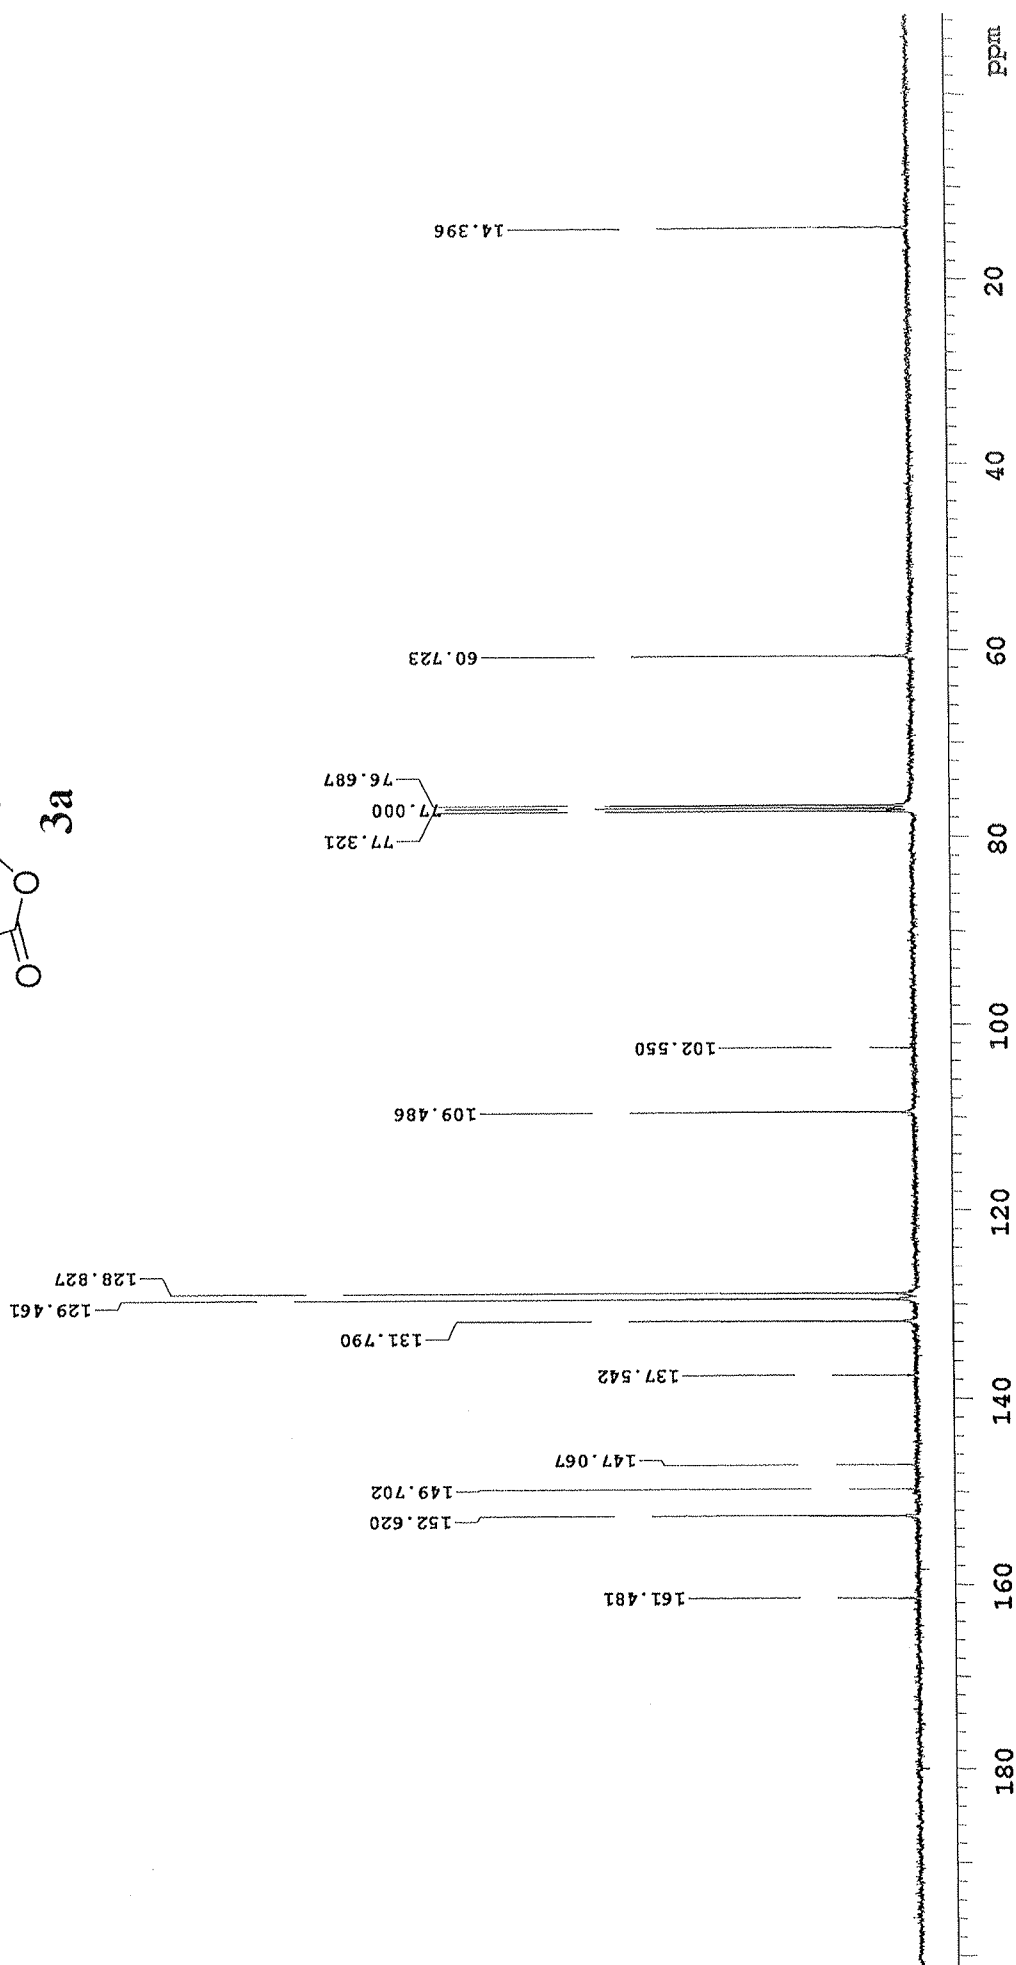

# Copies of NMR spectra

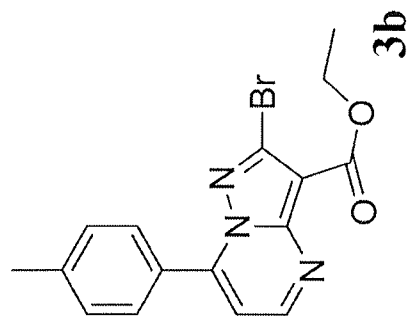

NMR-400 in CDCl<sub>3</sub>  
AR.No:ME1010/1437  
Date: 18<sup>th</sup> Oct 2010

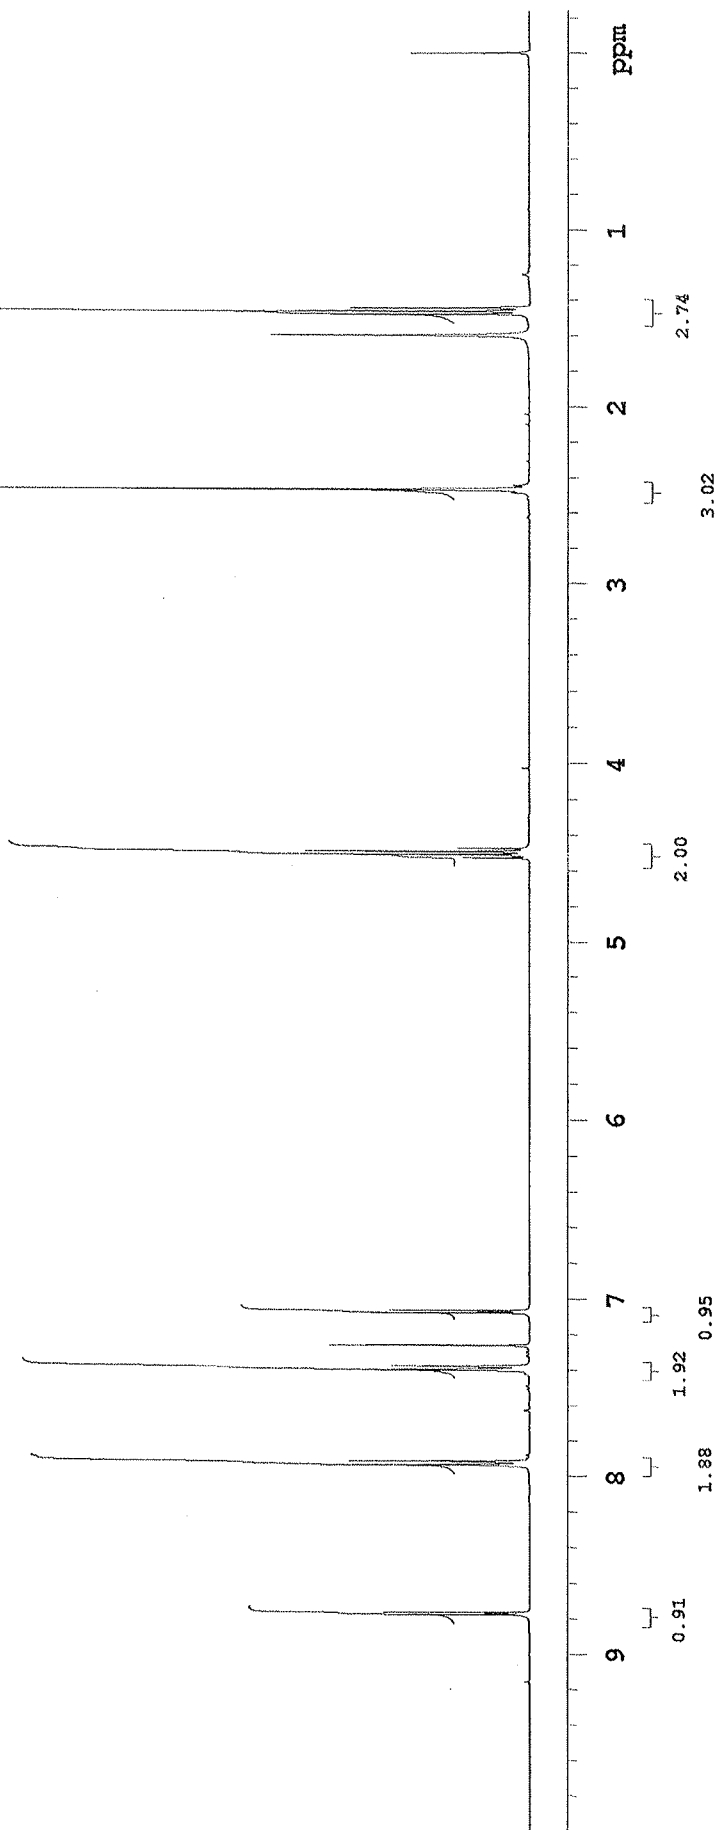

### Copies of NMR spectra

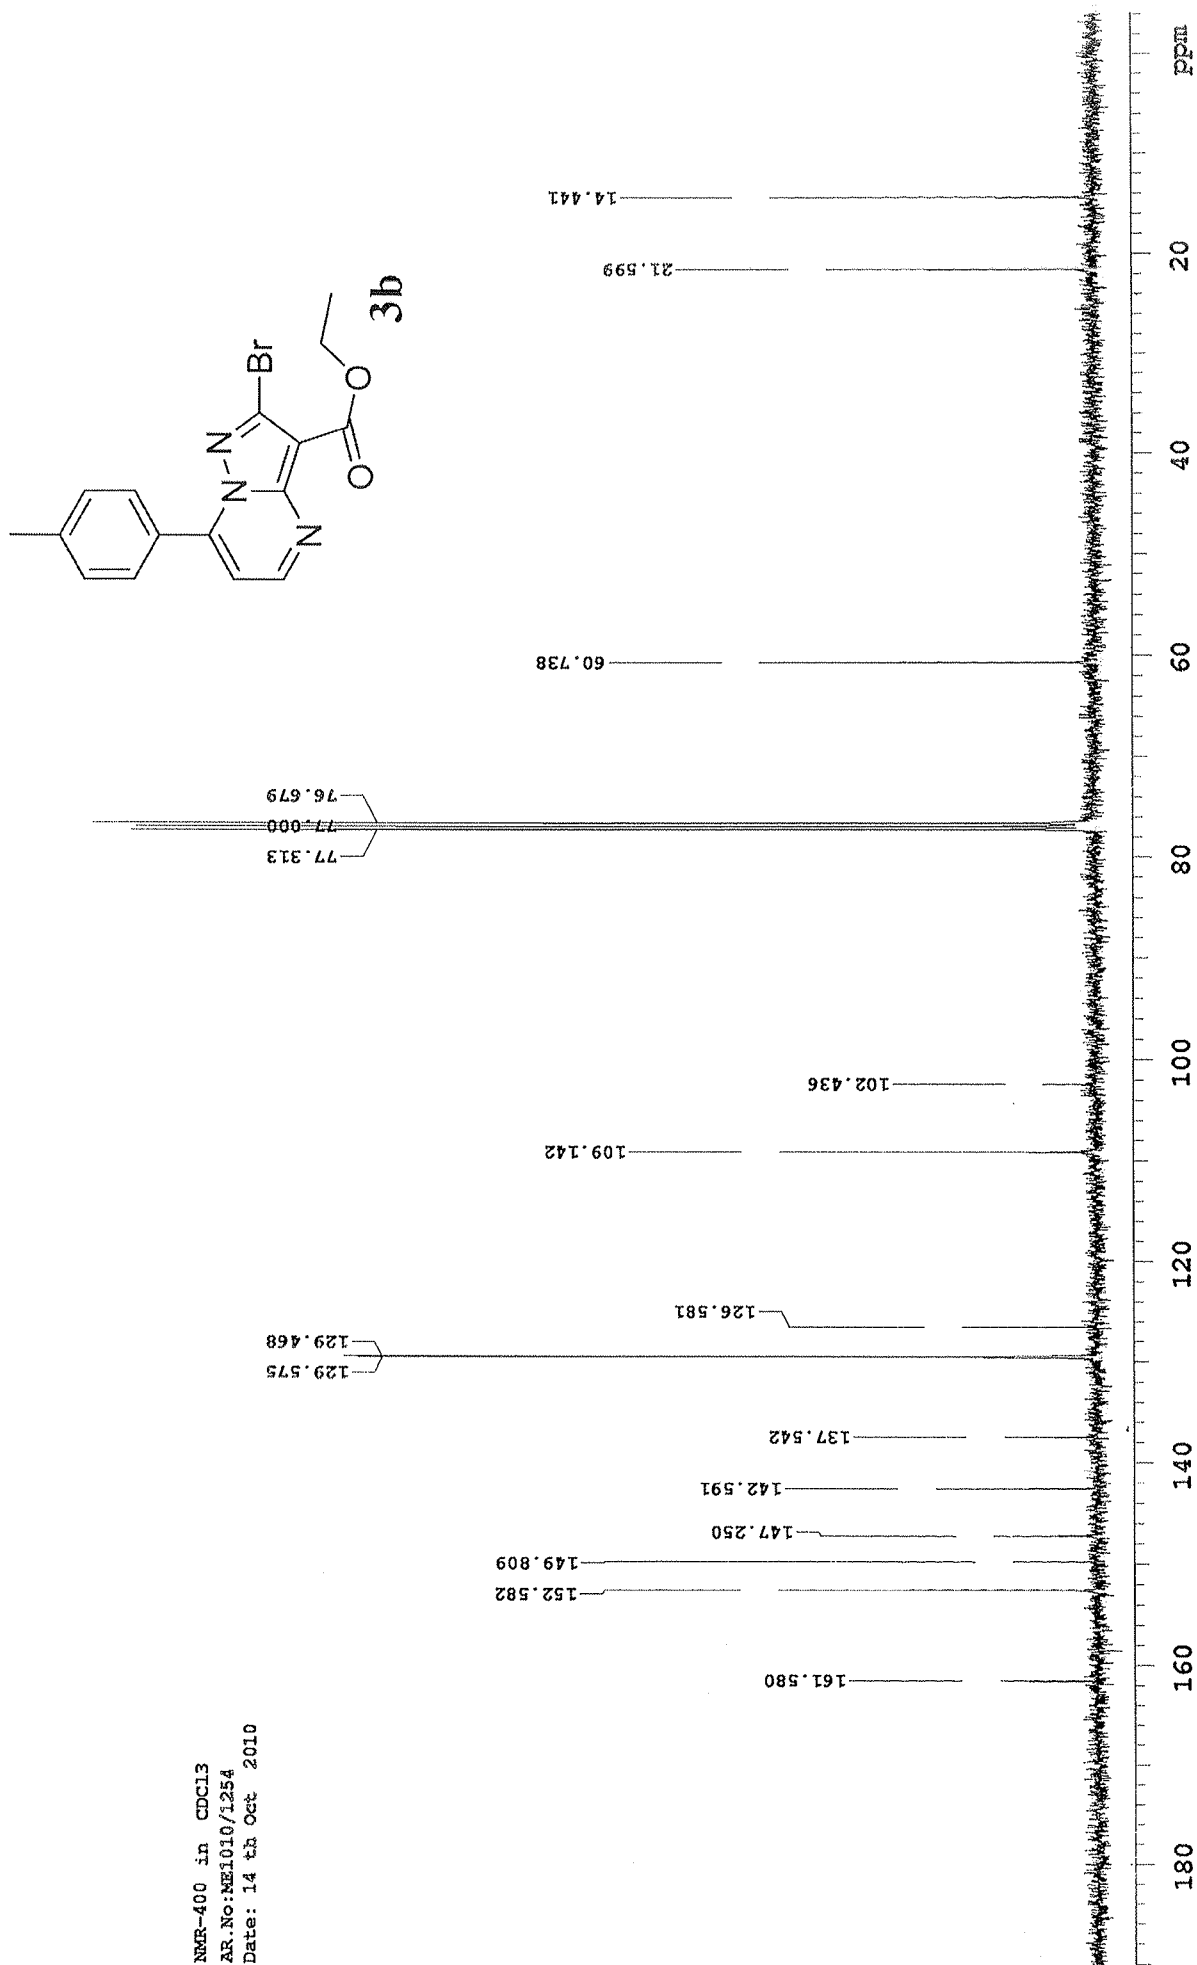

NMR-400 in CDCl3  
AR.No:MEI010/1254  
Date: 14 th Oct 2010



# Copies of NMR spectra

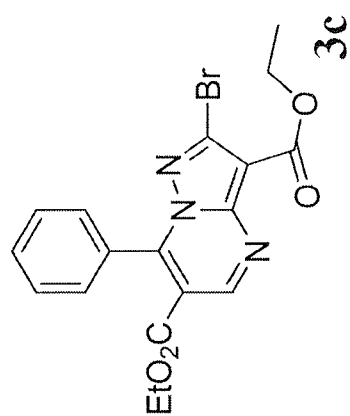

NMR-400 in CDCl<sub>3</sub>  
AR.No:MEI010/1438  
Date: 18<sup>th</sup> Oct 2010

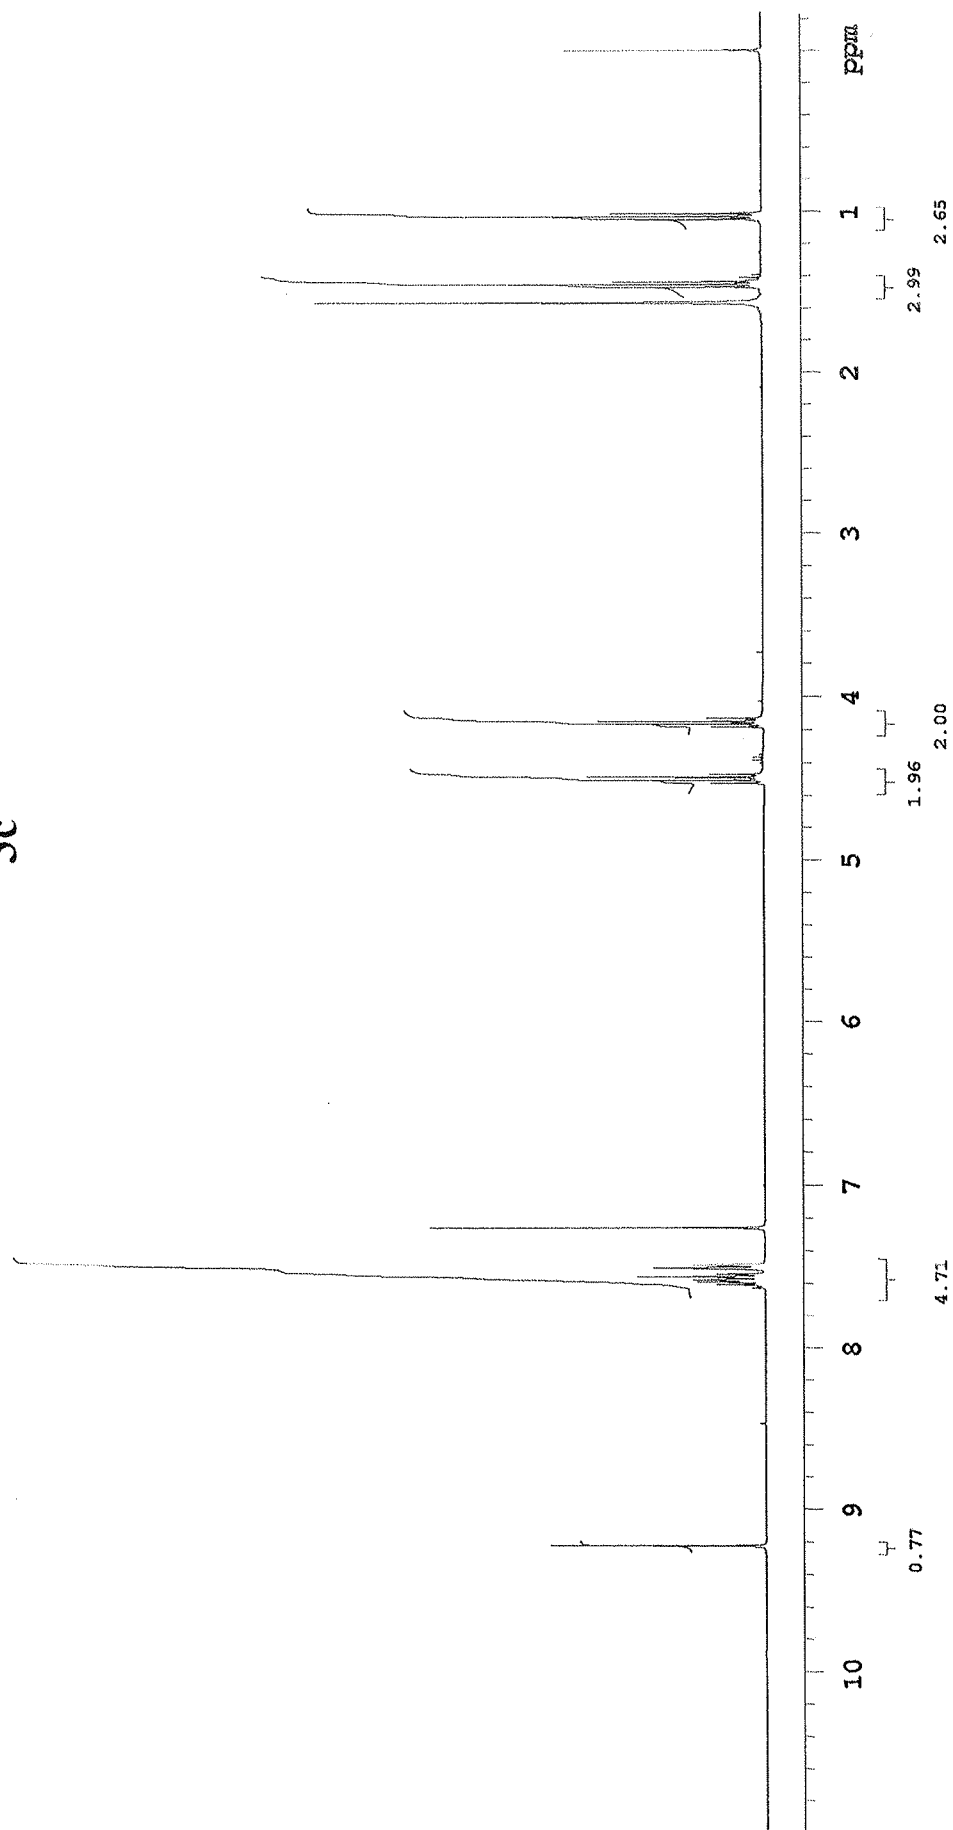

### Copies of NMR spectra

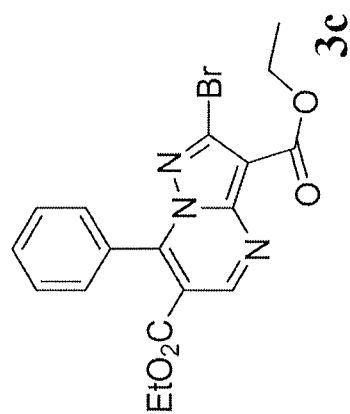

NMR-100 in CDCl<sub>3</sub>  
AR.No:ME1010/1252  
Date: 14 th Oct 2010

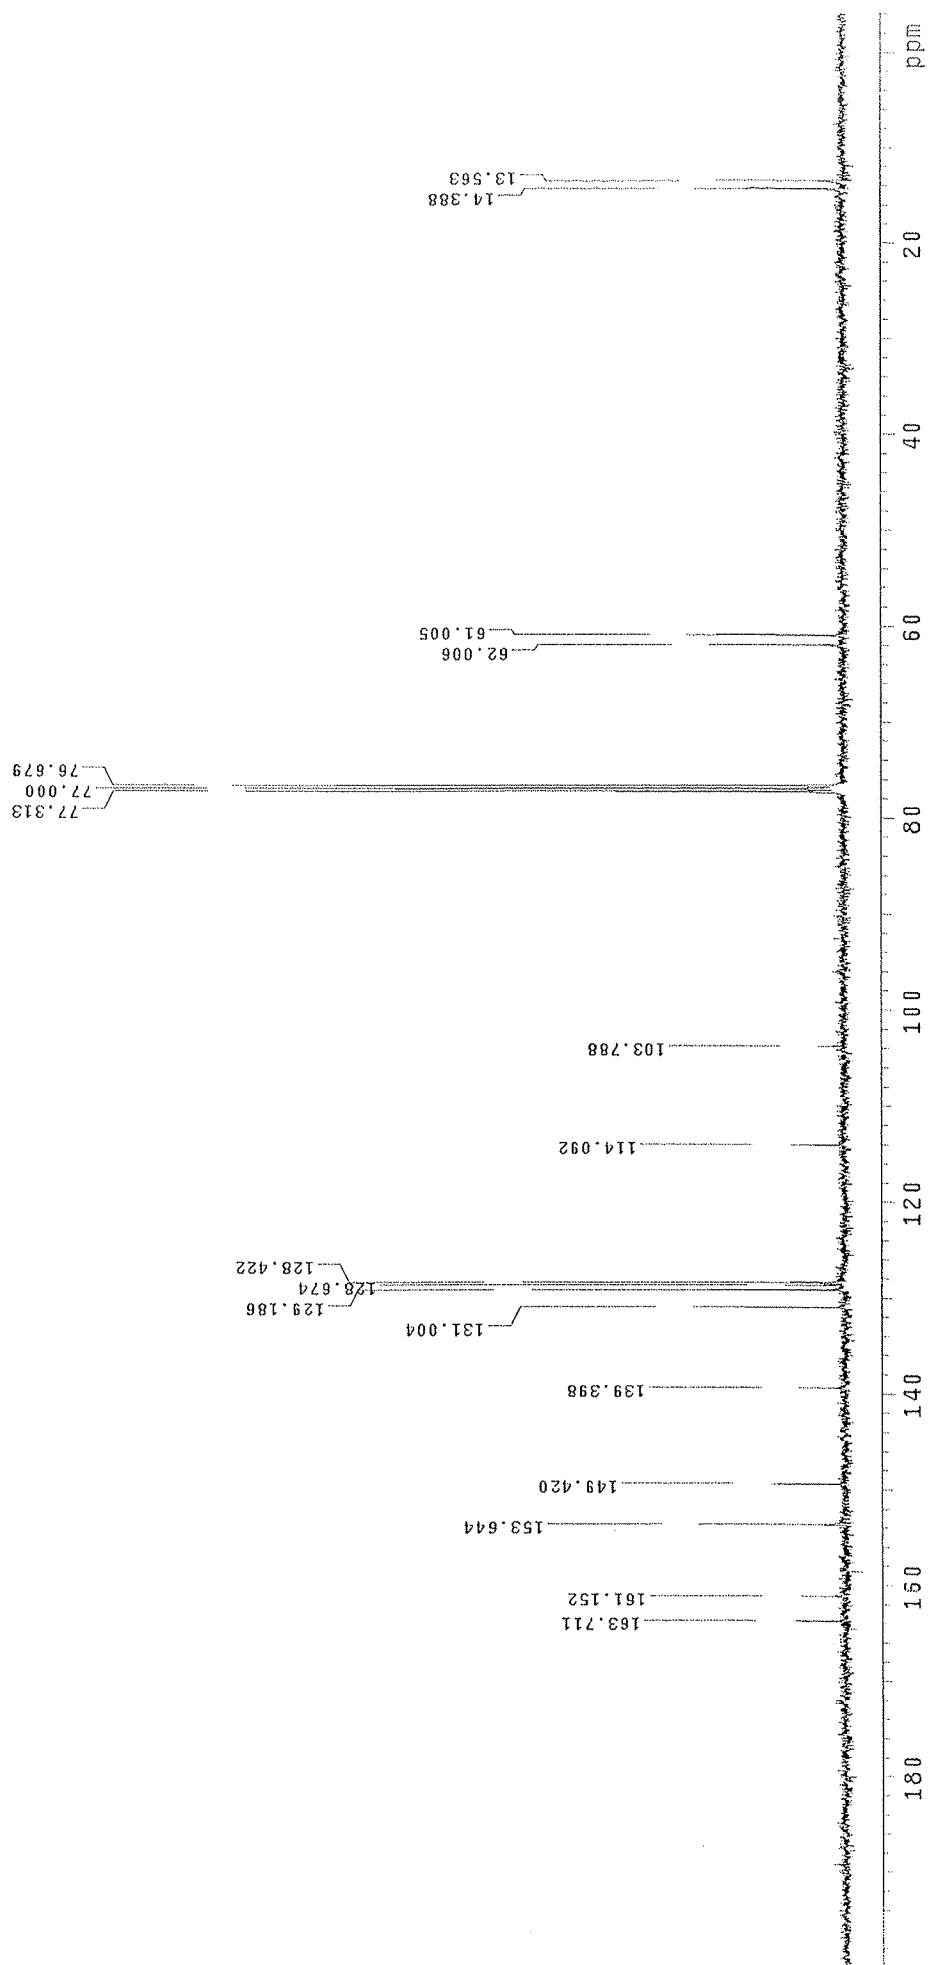

# Copies of NMR spectra

AR&D, Aurigene Discovery Technologies Ltd, Hyderabad  
Instrument : Mercury Plus (Varian 400MHz)  
Date & Time : Fri May 21 16:38:22 IST 2010

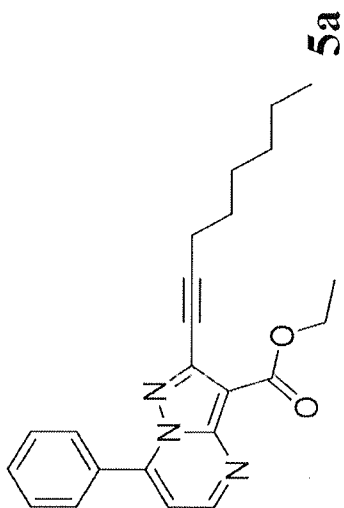

AR.No:ME0510/1520  
Date:21st May 2010

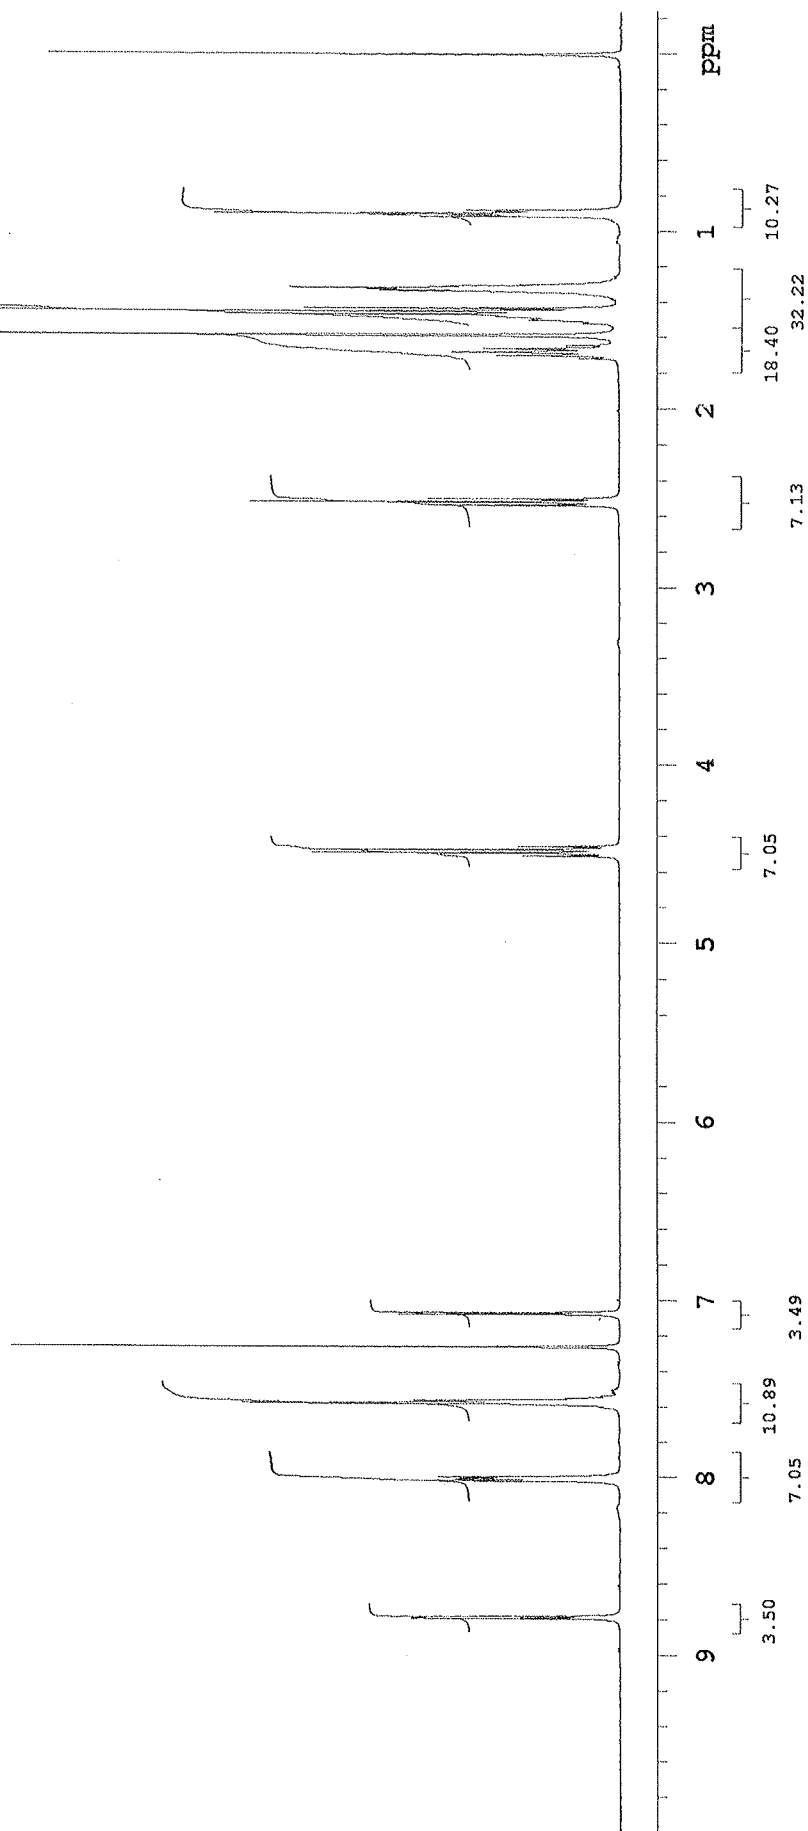

### Copies of NMR spectra

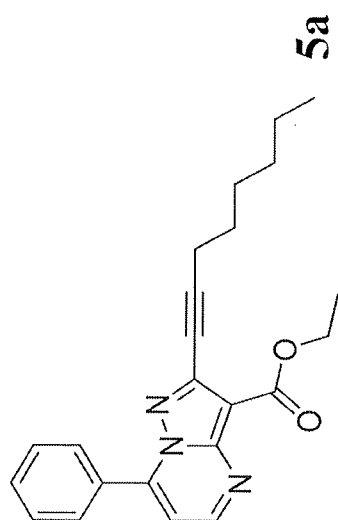

NMR-400 in CDCl<sub>3</sub>  
AR.No:ME1010/1078  
Date:13th Oct. 2010

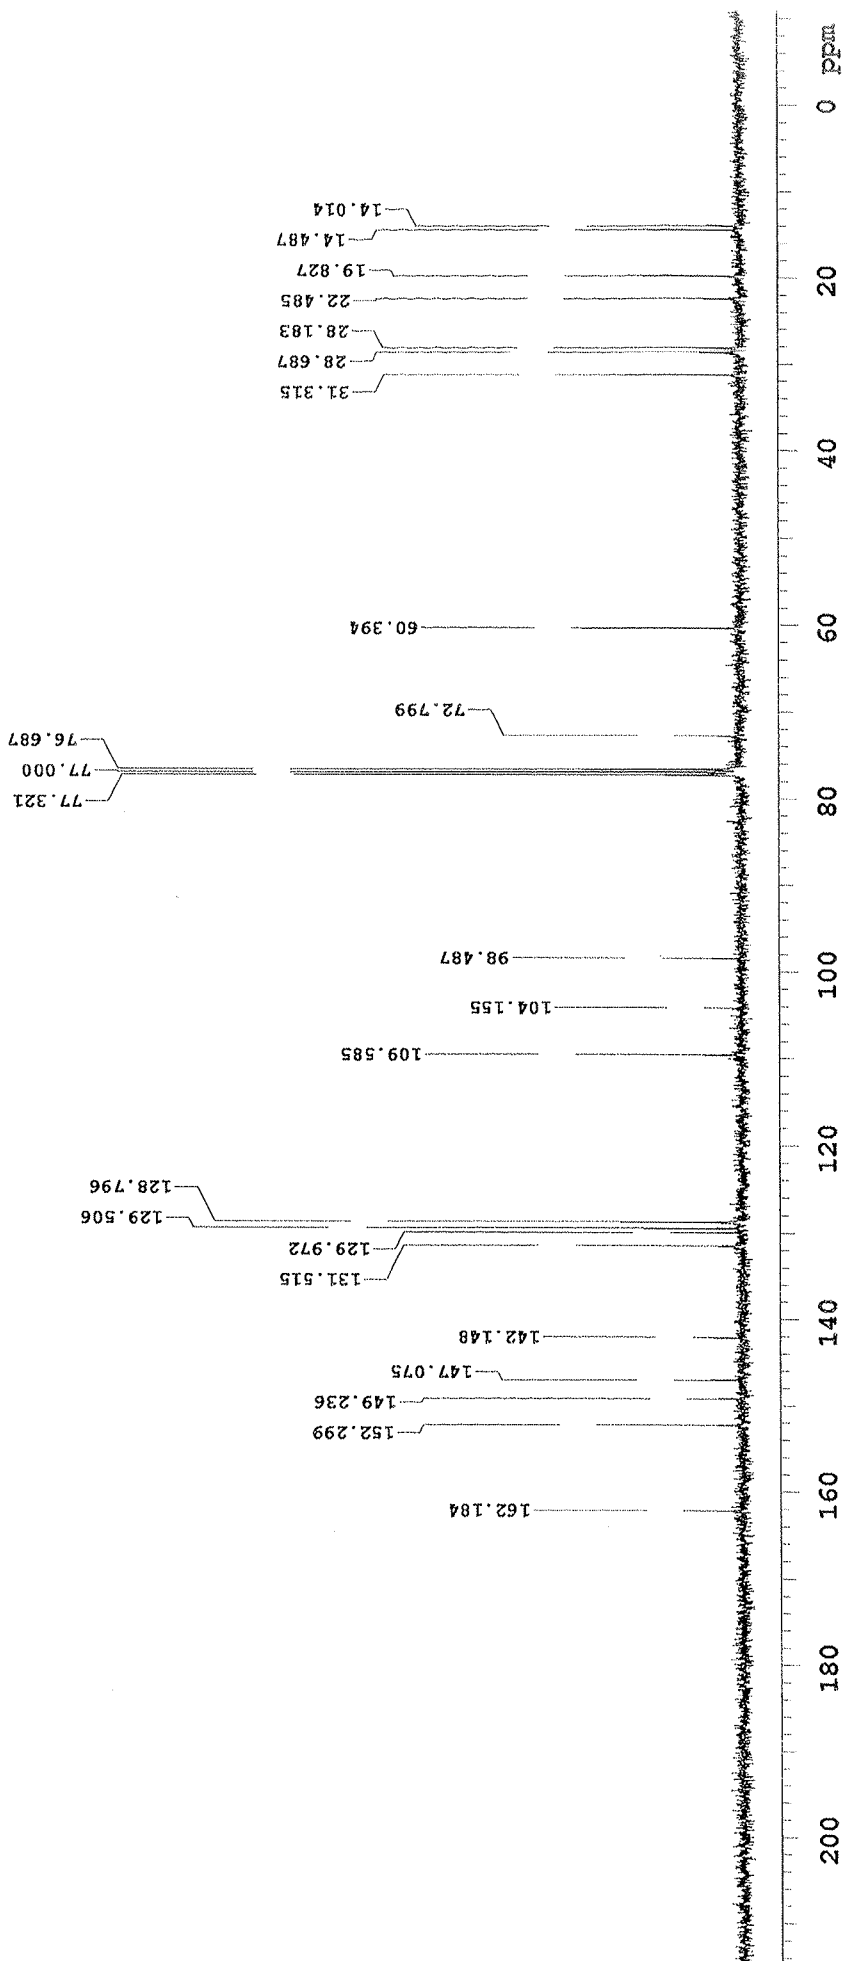

### Copies of NMR spectra

NMR-400 in CDCl<sub>3</sub>  
AR.No:ME1010/61  
Date: 01 st Oct 2010

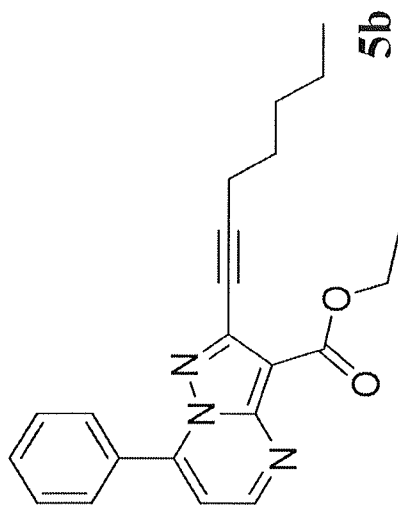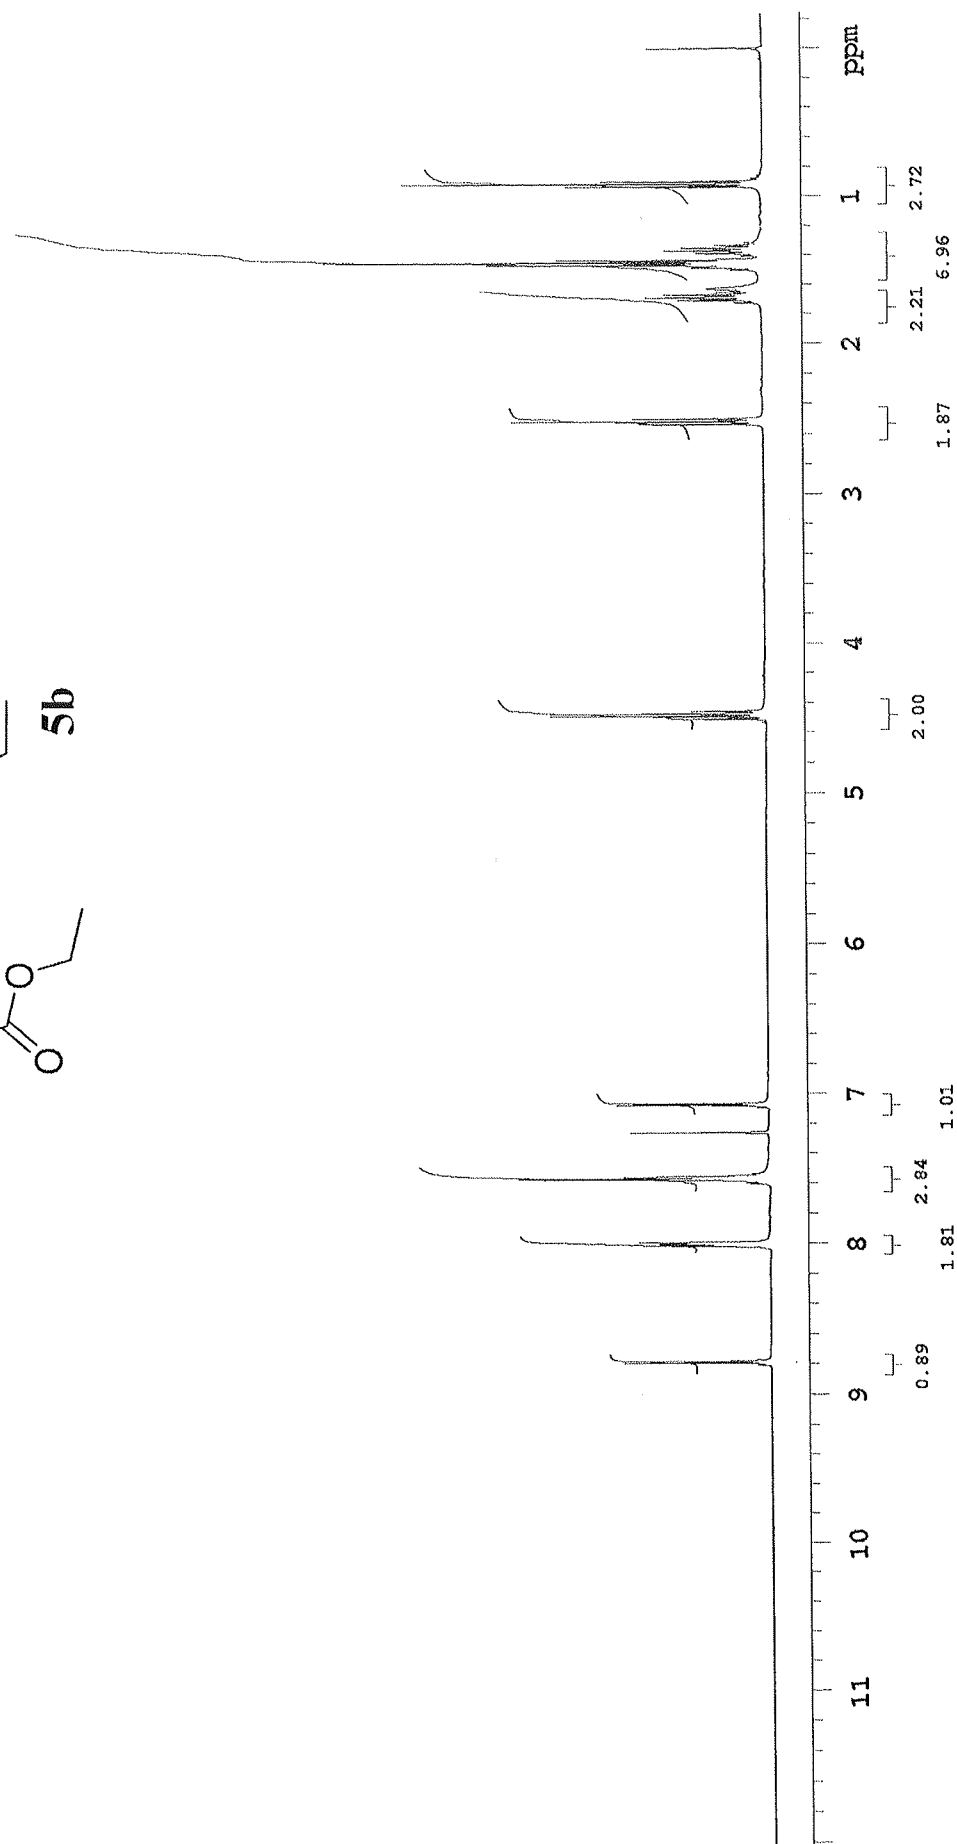

### Copies of NMR spectra

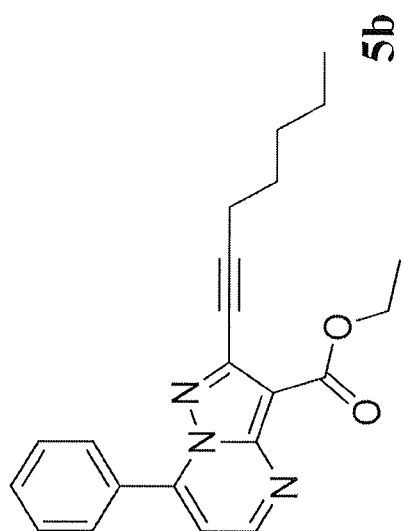

5b

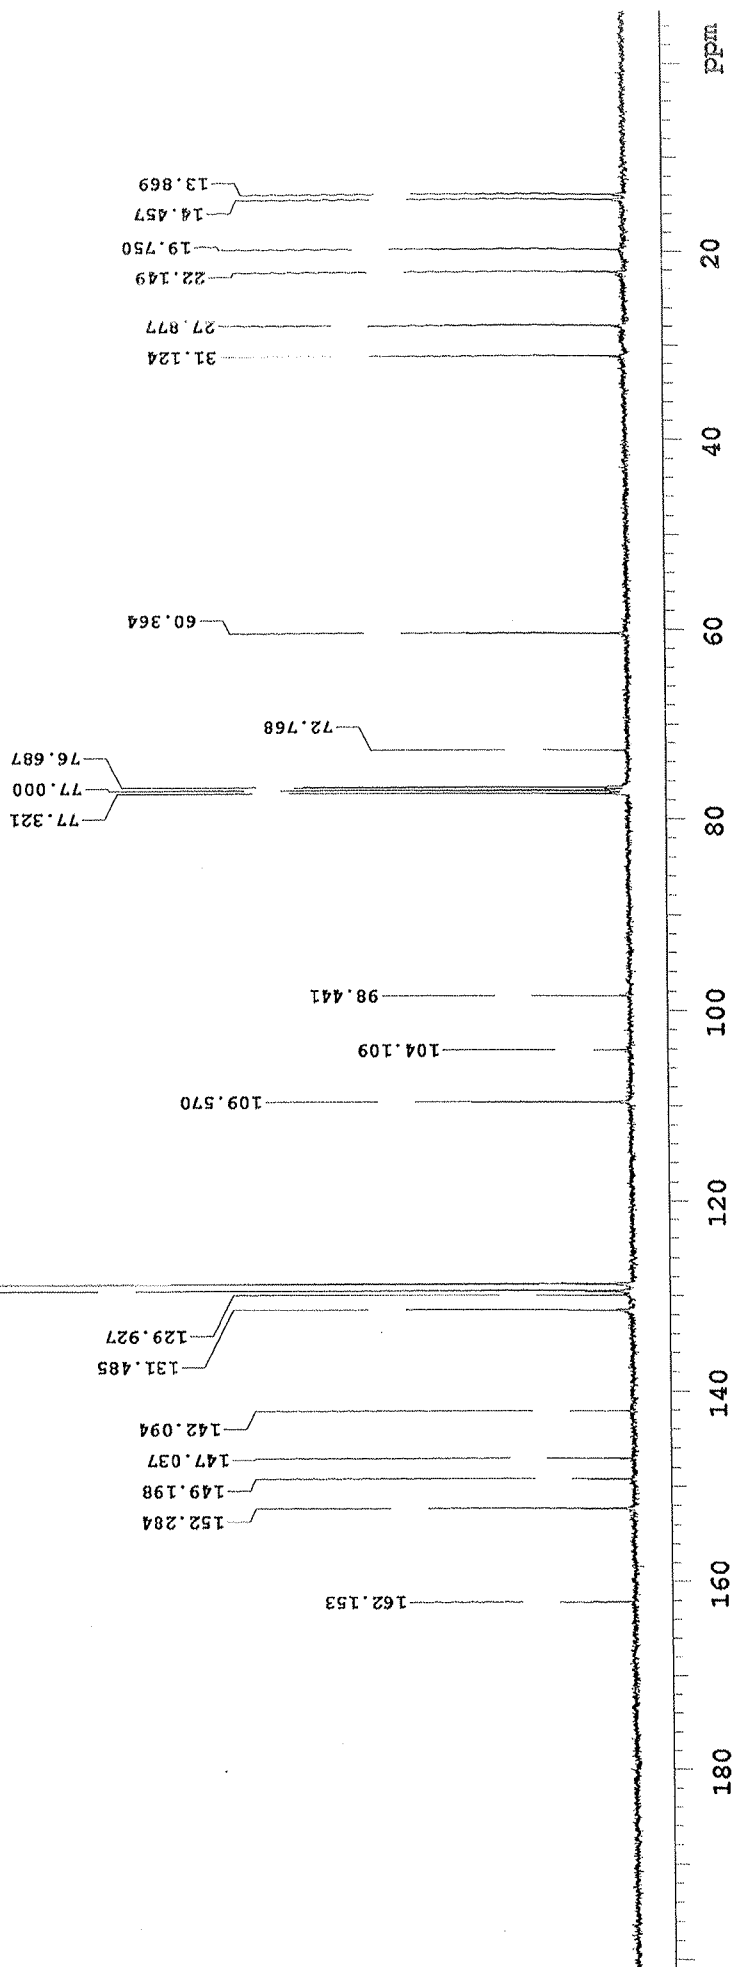

NMR-400 in CDCl<sub>3</sub>  
AR.No:ME1010/1251  
Date: 15 th Oct 2010

# Copies of NMR spectra

AR&D, Aurigene Discovery Technologies Ltd, Hyderabad  
Instrument : Mercury Plus (Varian 400MHz)  
Date & Time : Wed Apr 28 15:26:45 IST 2010

AR.No:ME0410/1854  
Date:27th April 2010

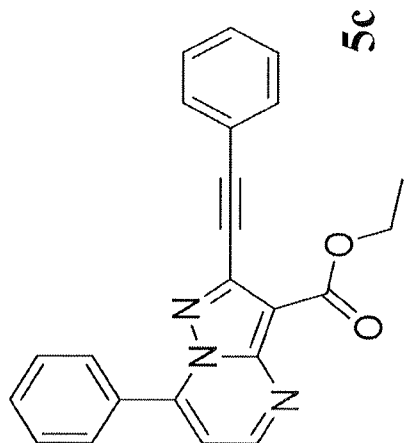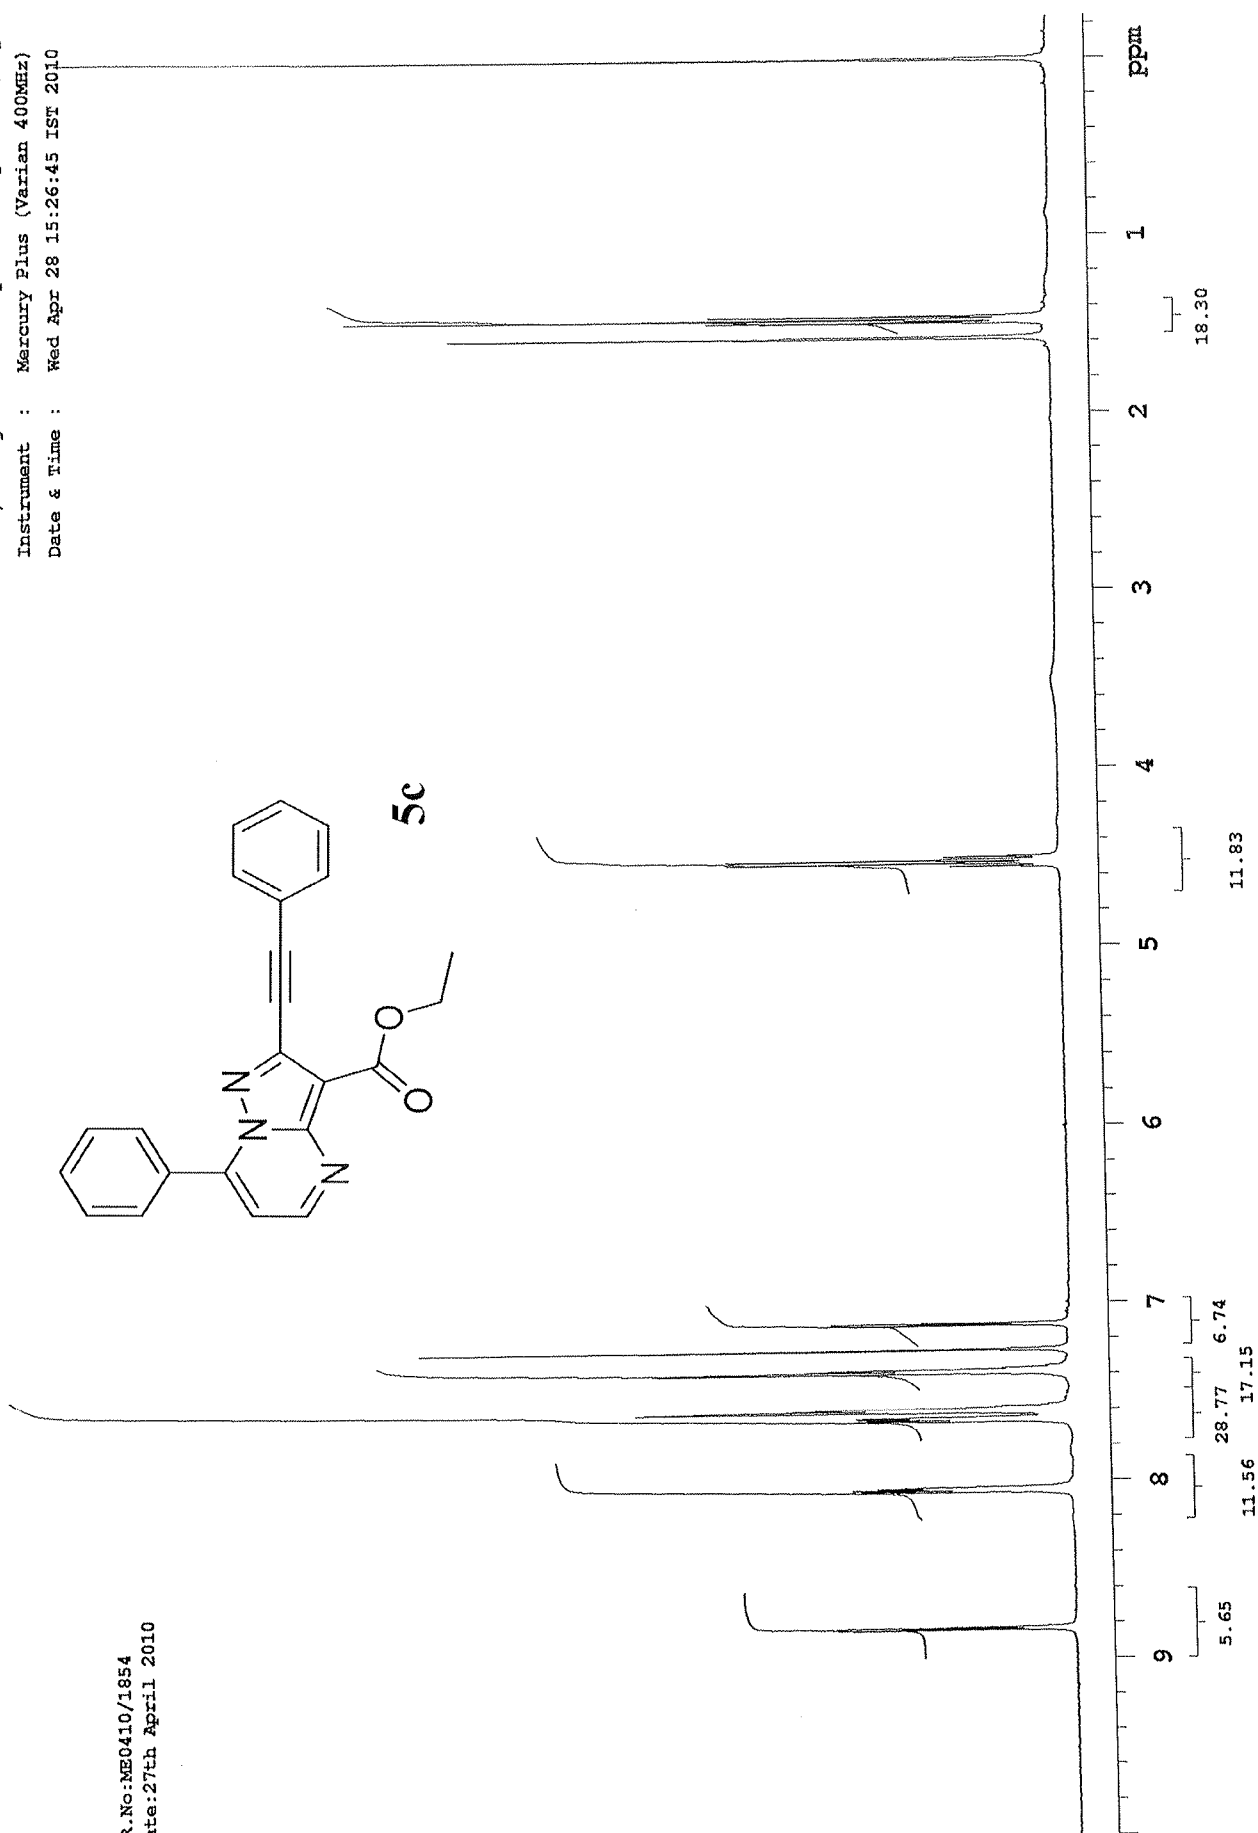

### Copies of NMR spectra

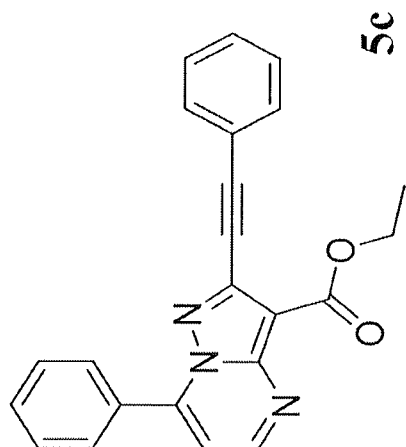

NMR-400 in CDCl<sub>3</sub>  
AR.No:ME1010/1141  
Date:13th Oct.2010

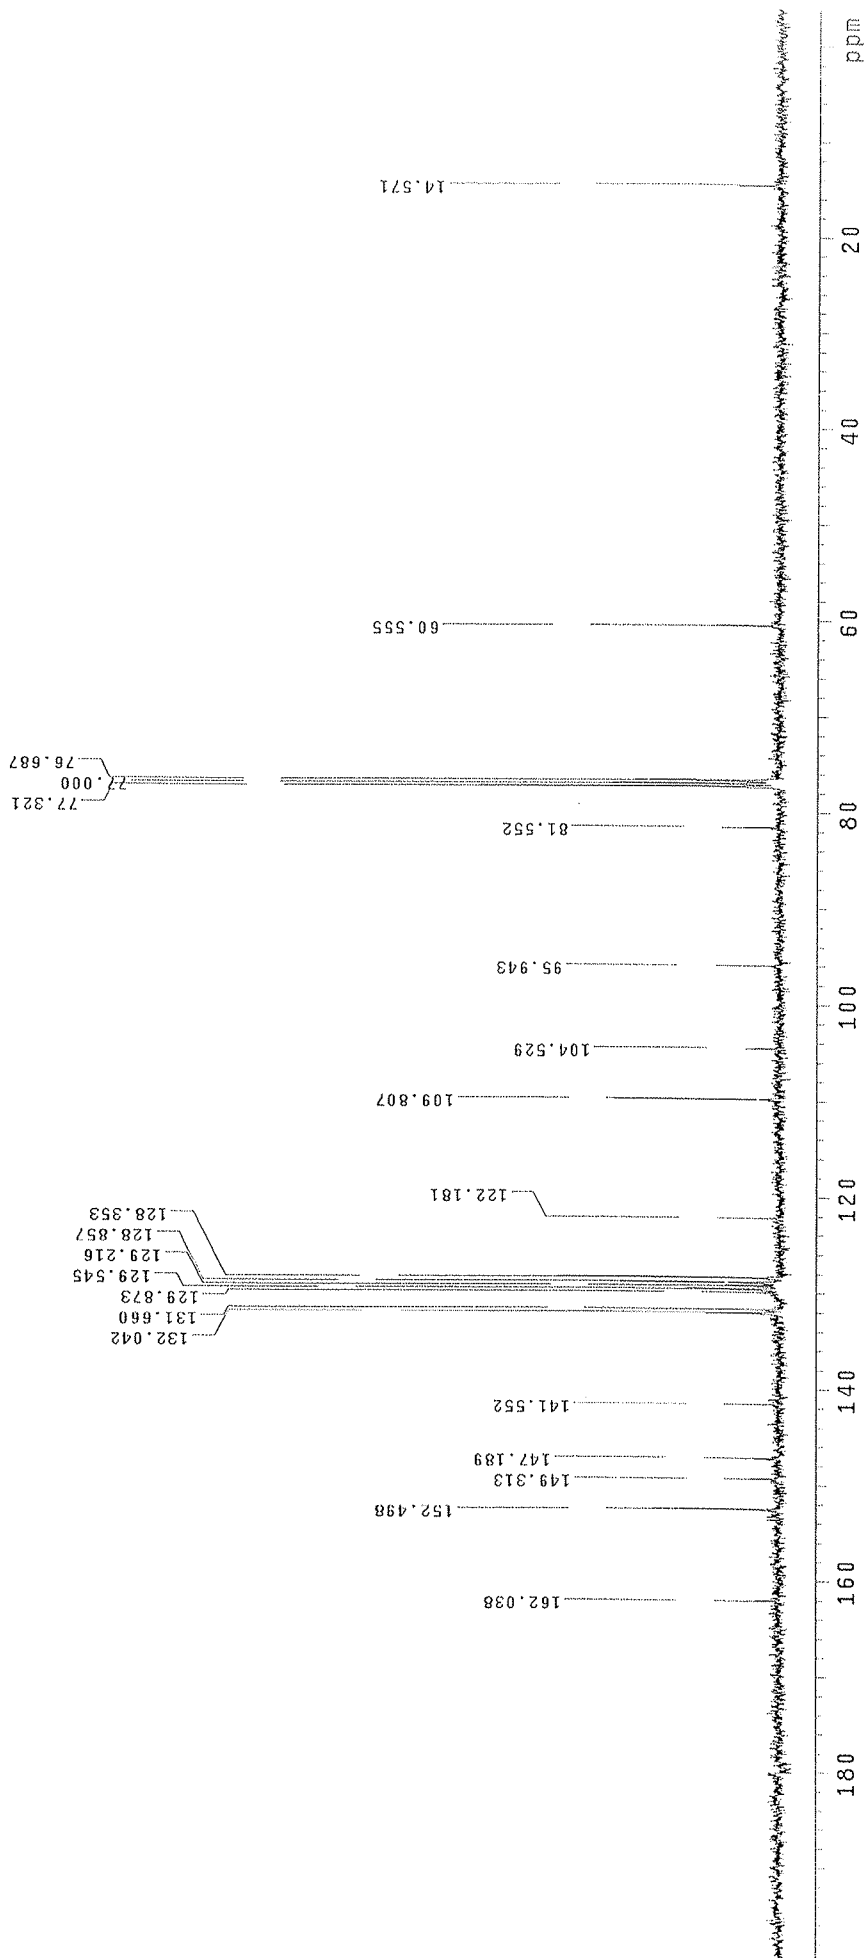



### Copies of NMR spectra

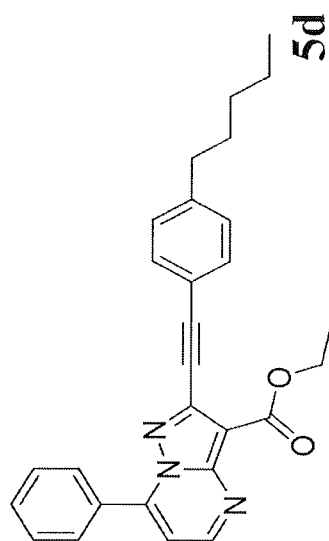

5d

NMR-400 in CDCl<sub>3</sub>  
RR.No:ME1010/62  
Date: 01 st Oct 2010

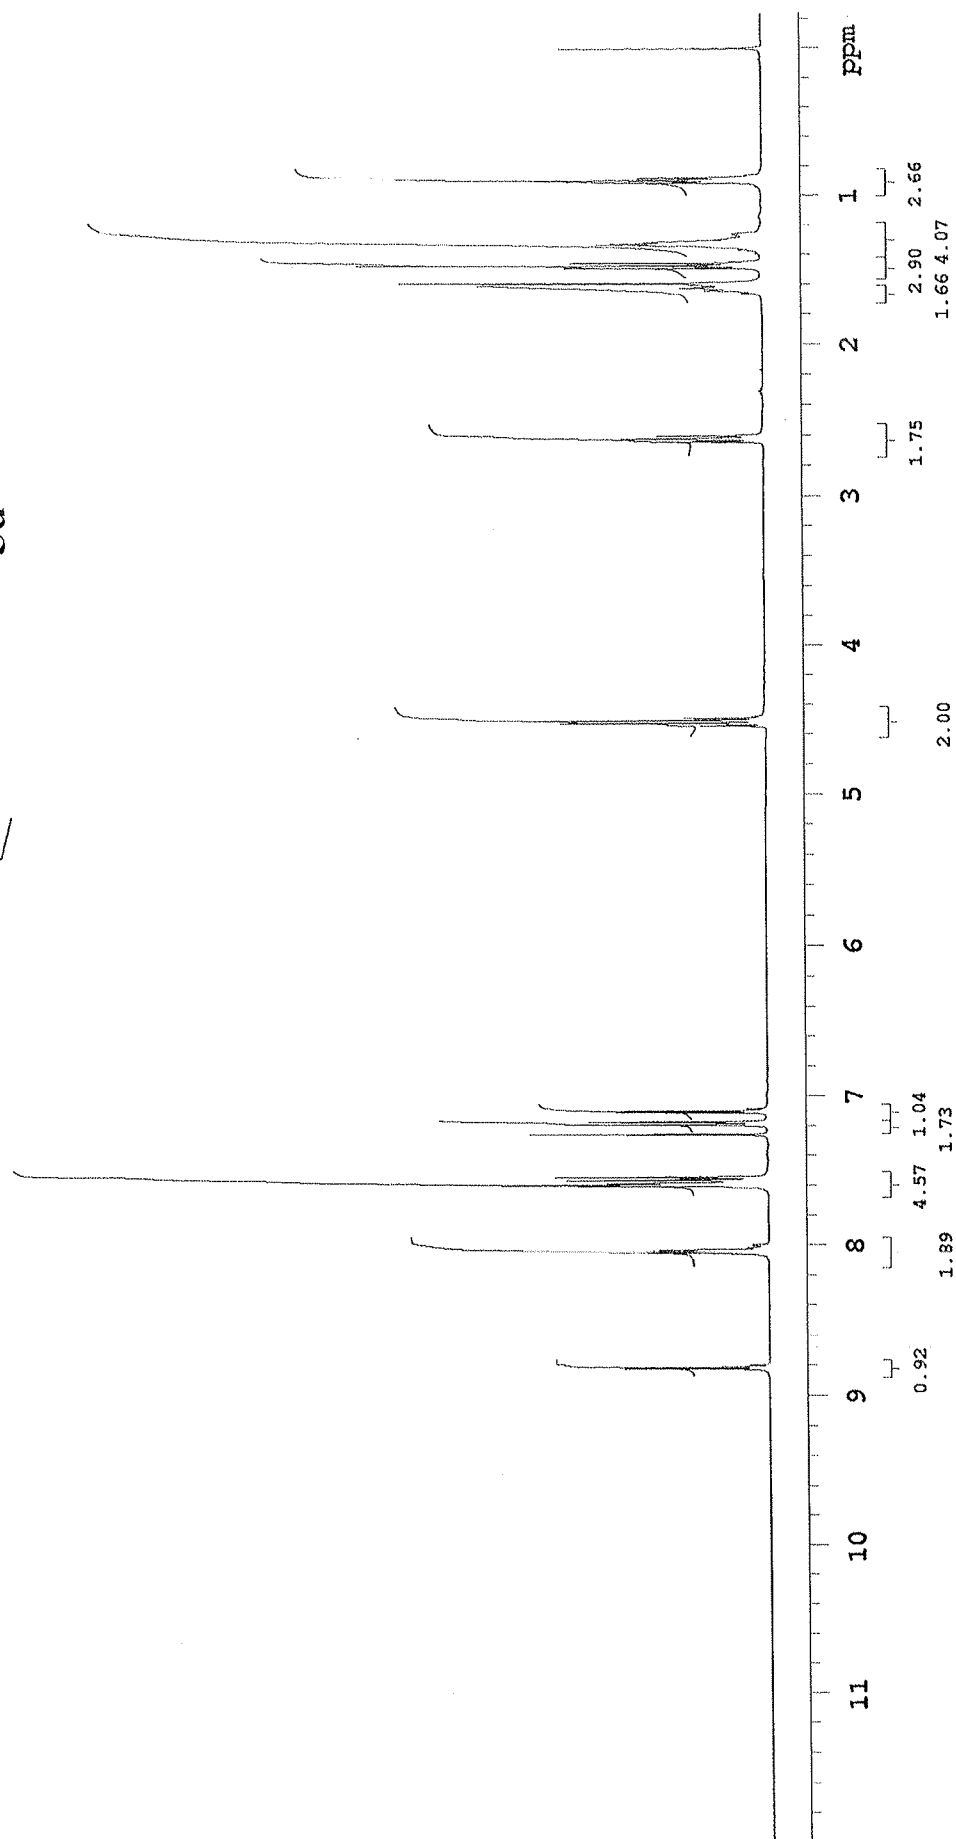

### Copies of NMR spectra

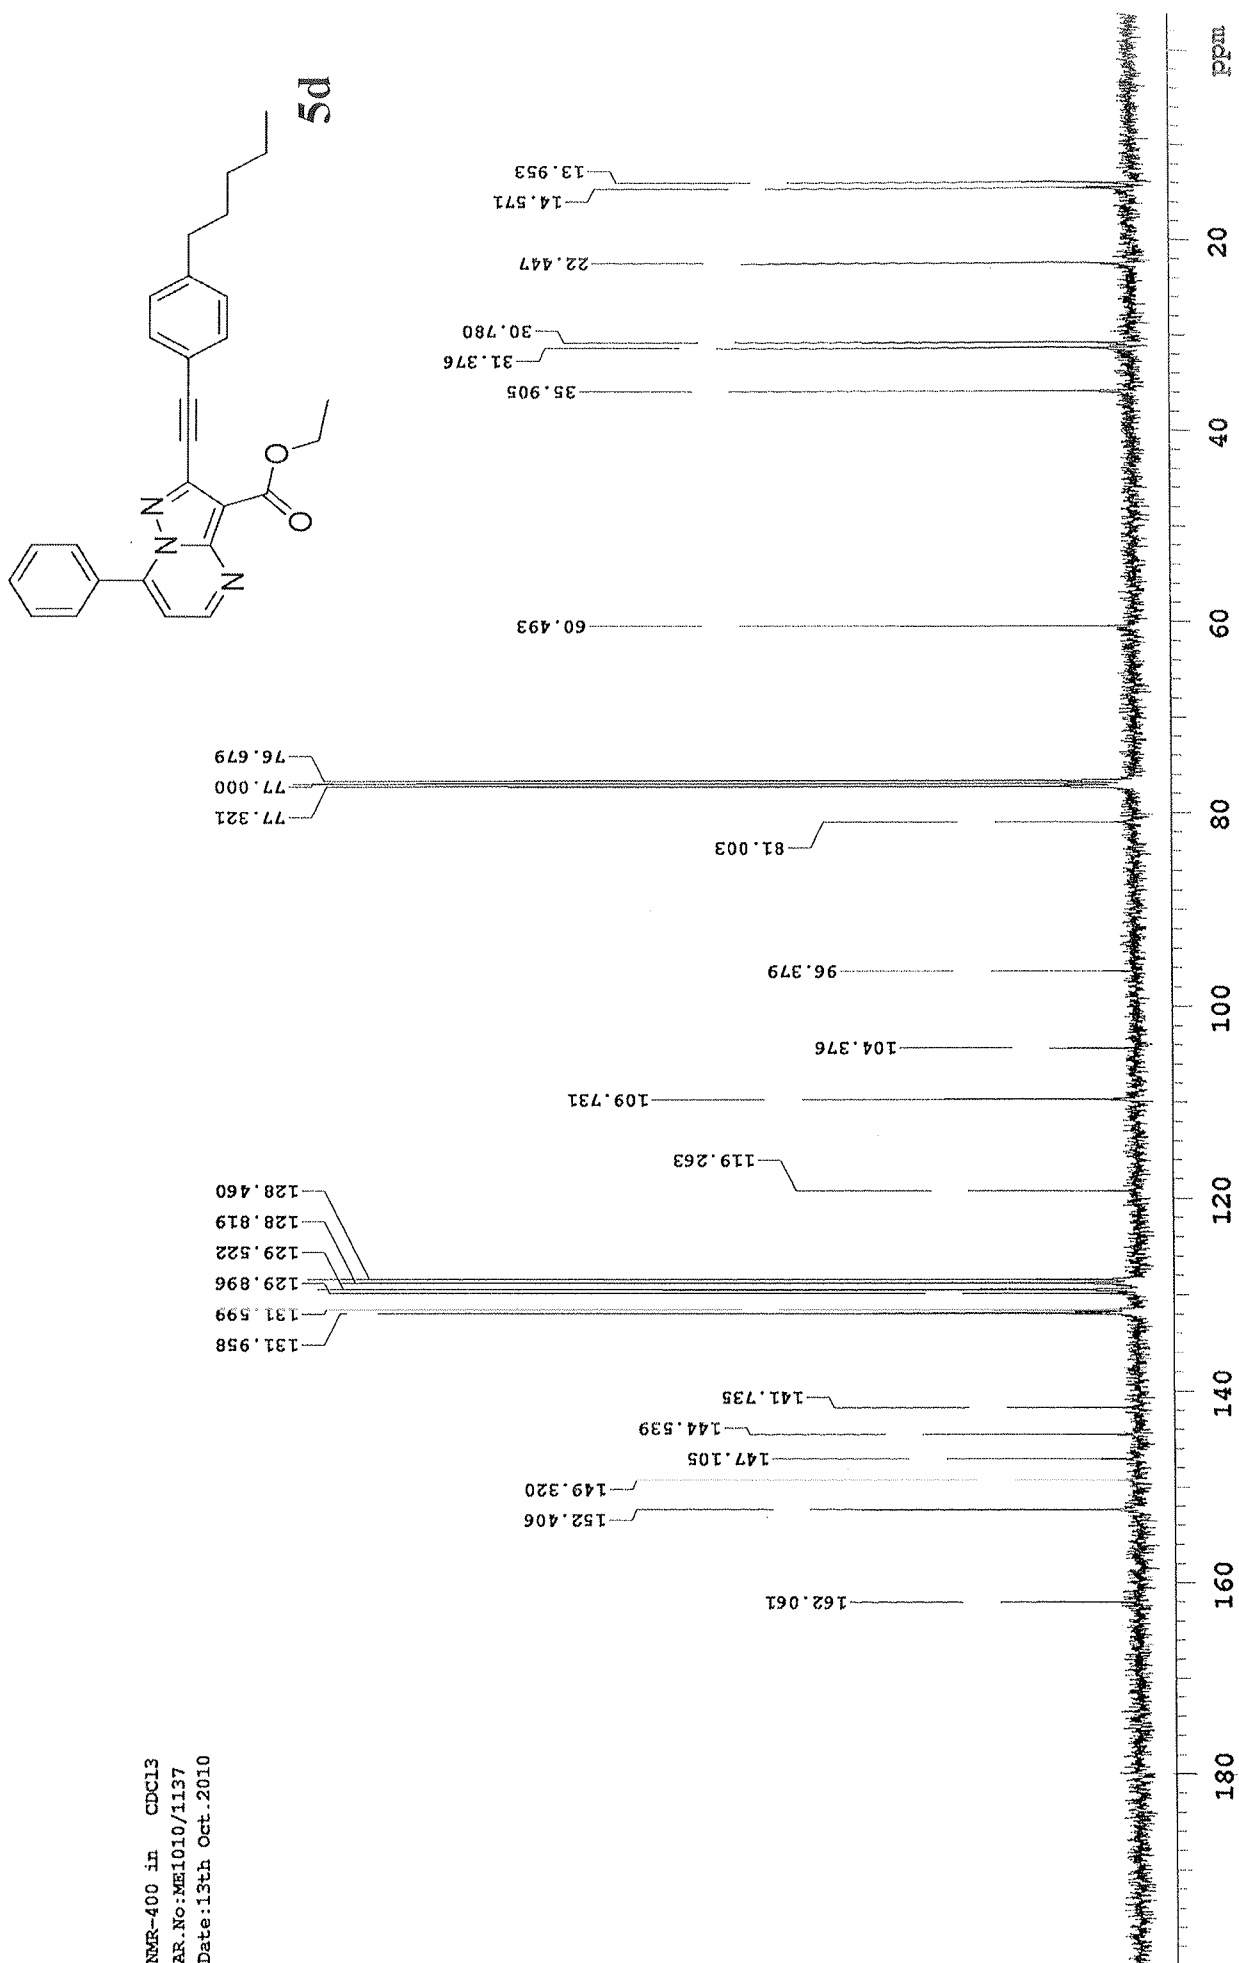

NMR-400 in CDCl<sub>3</sub>  
AR.No:ME1010/1137  
Date:13th Oct..2010

# Copies of NMR spectra

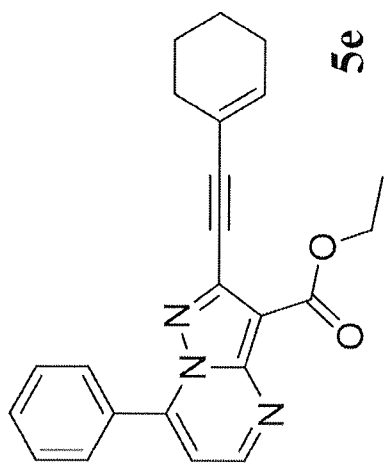

5e

NMR-400 in CDCl<sub>3</sub>  
AR.No:ME1010/664  
Date: 8th Oct 2010

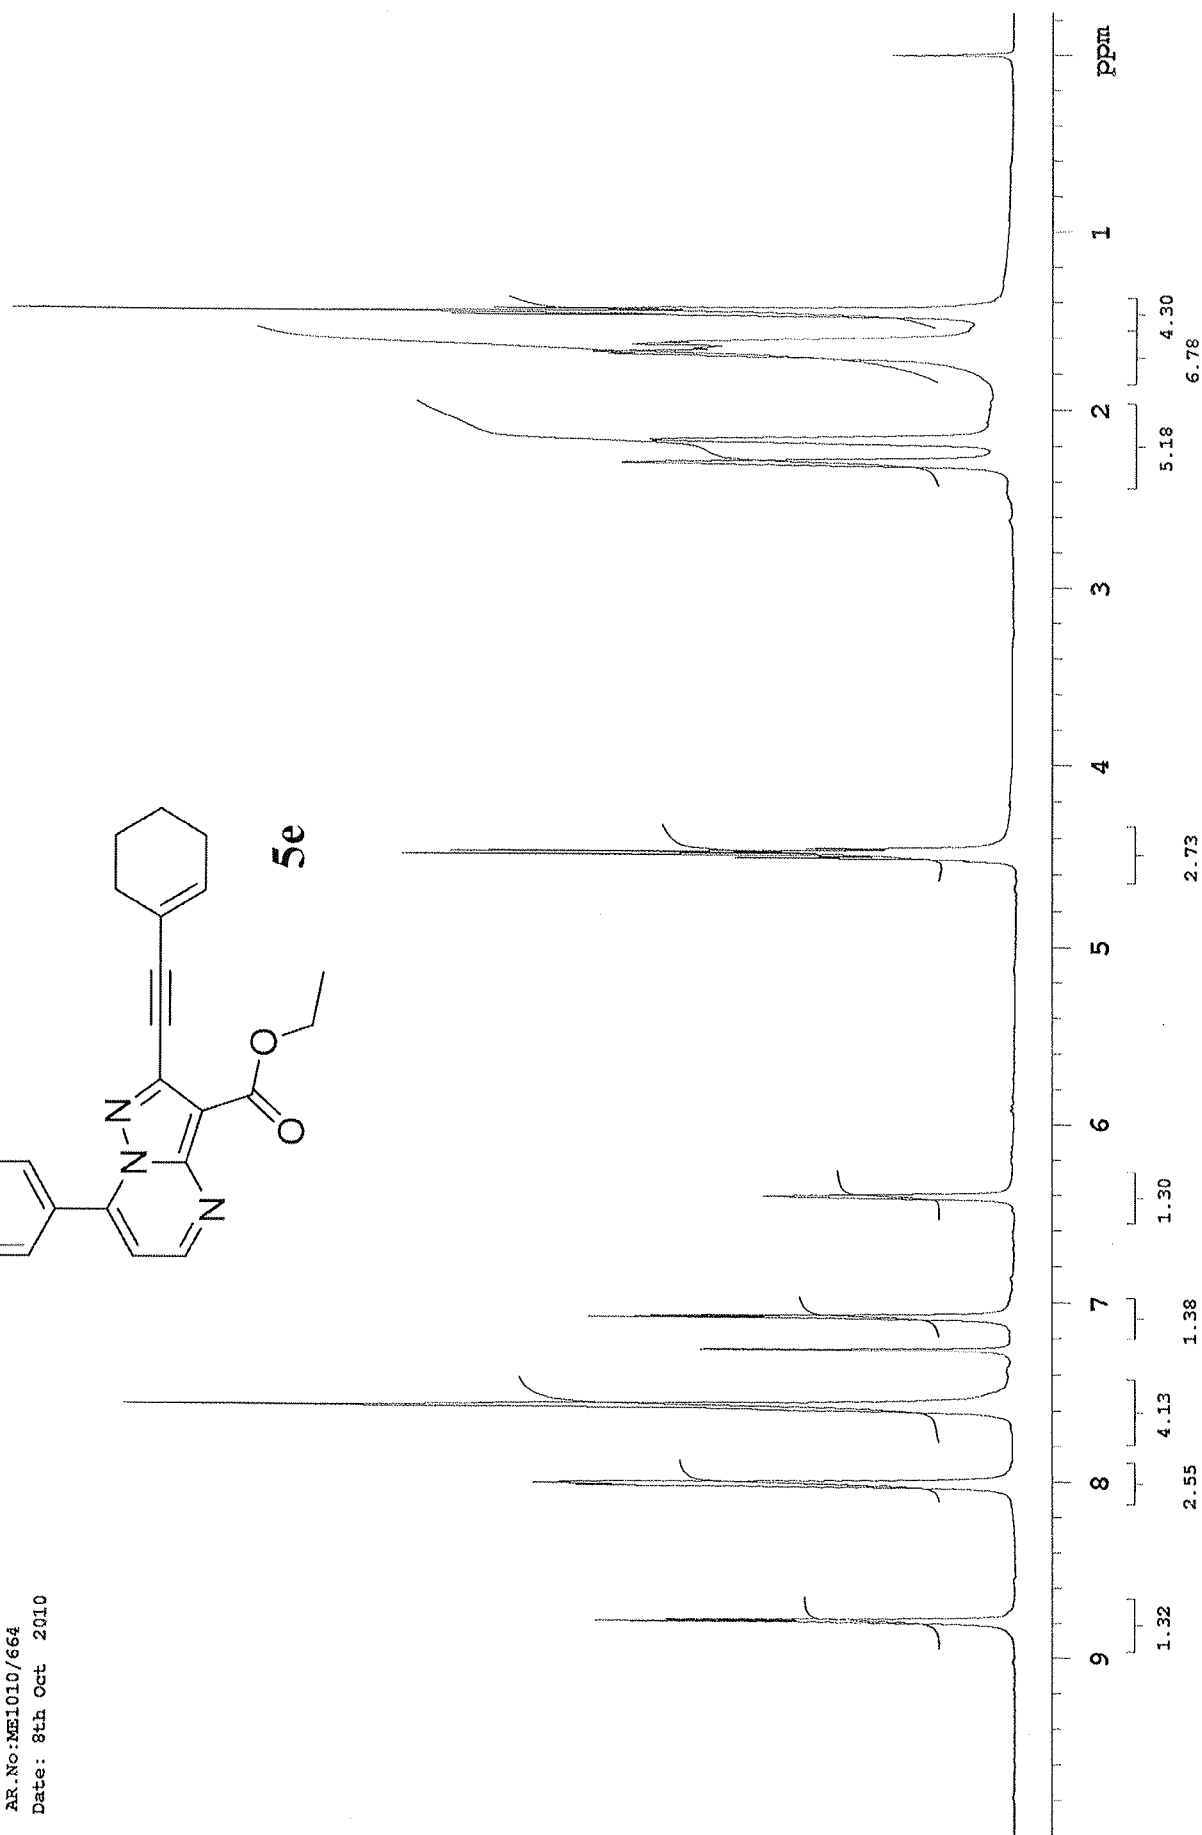

### Copies of NMR spectra

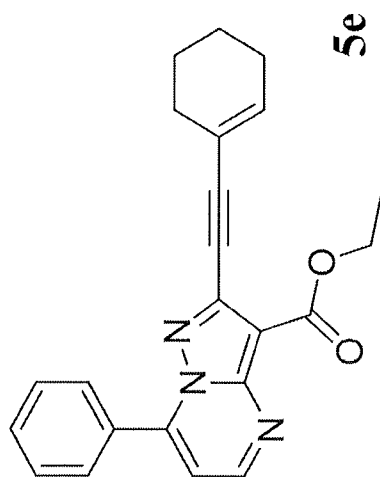

5e

NMR-400 in CDCl<sub>3</sub>  
AR.No:ME1210/245  
Date: 2nd Dec. 2010

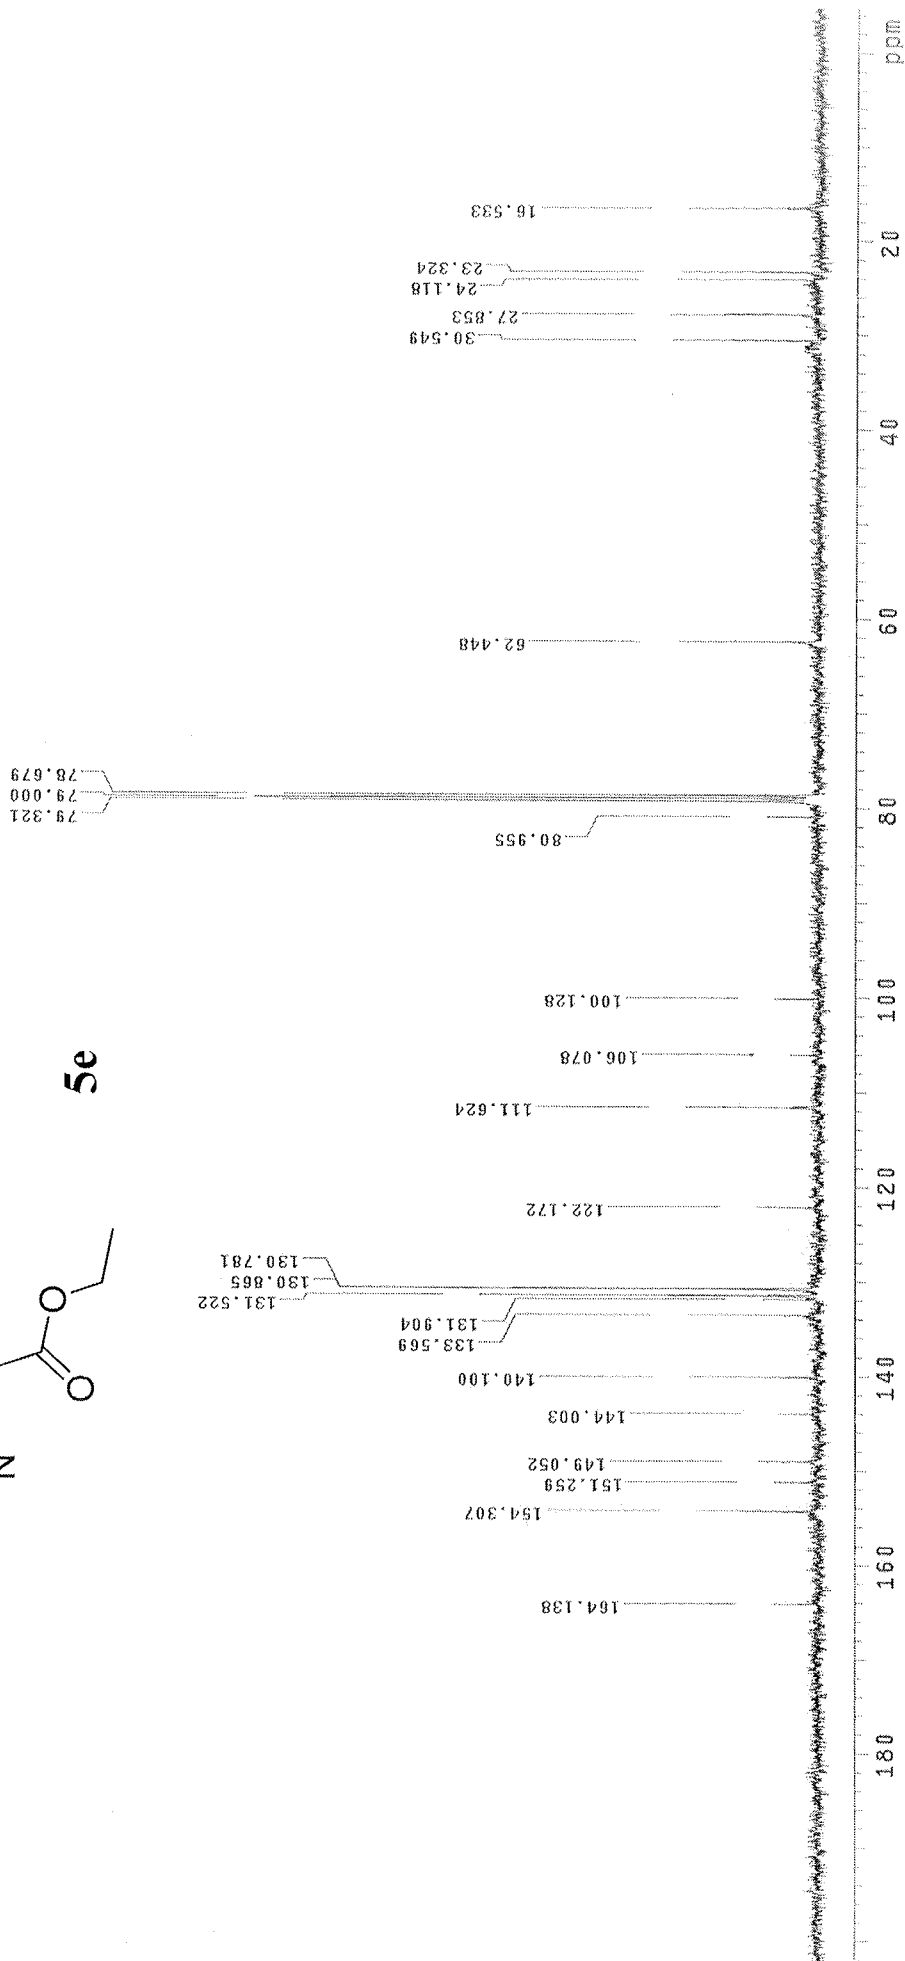

# Copies of NMR spectra

NMR-400 in CDCl<sub>3</sub>  
AR.No:ME1010/286  
Date: 5th Oct 2010

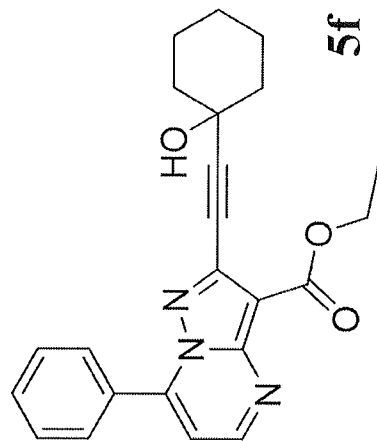

5f

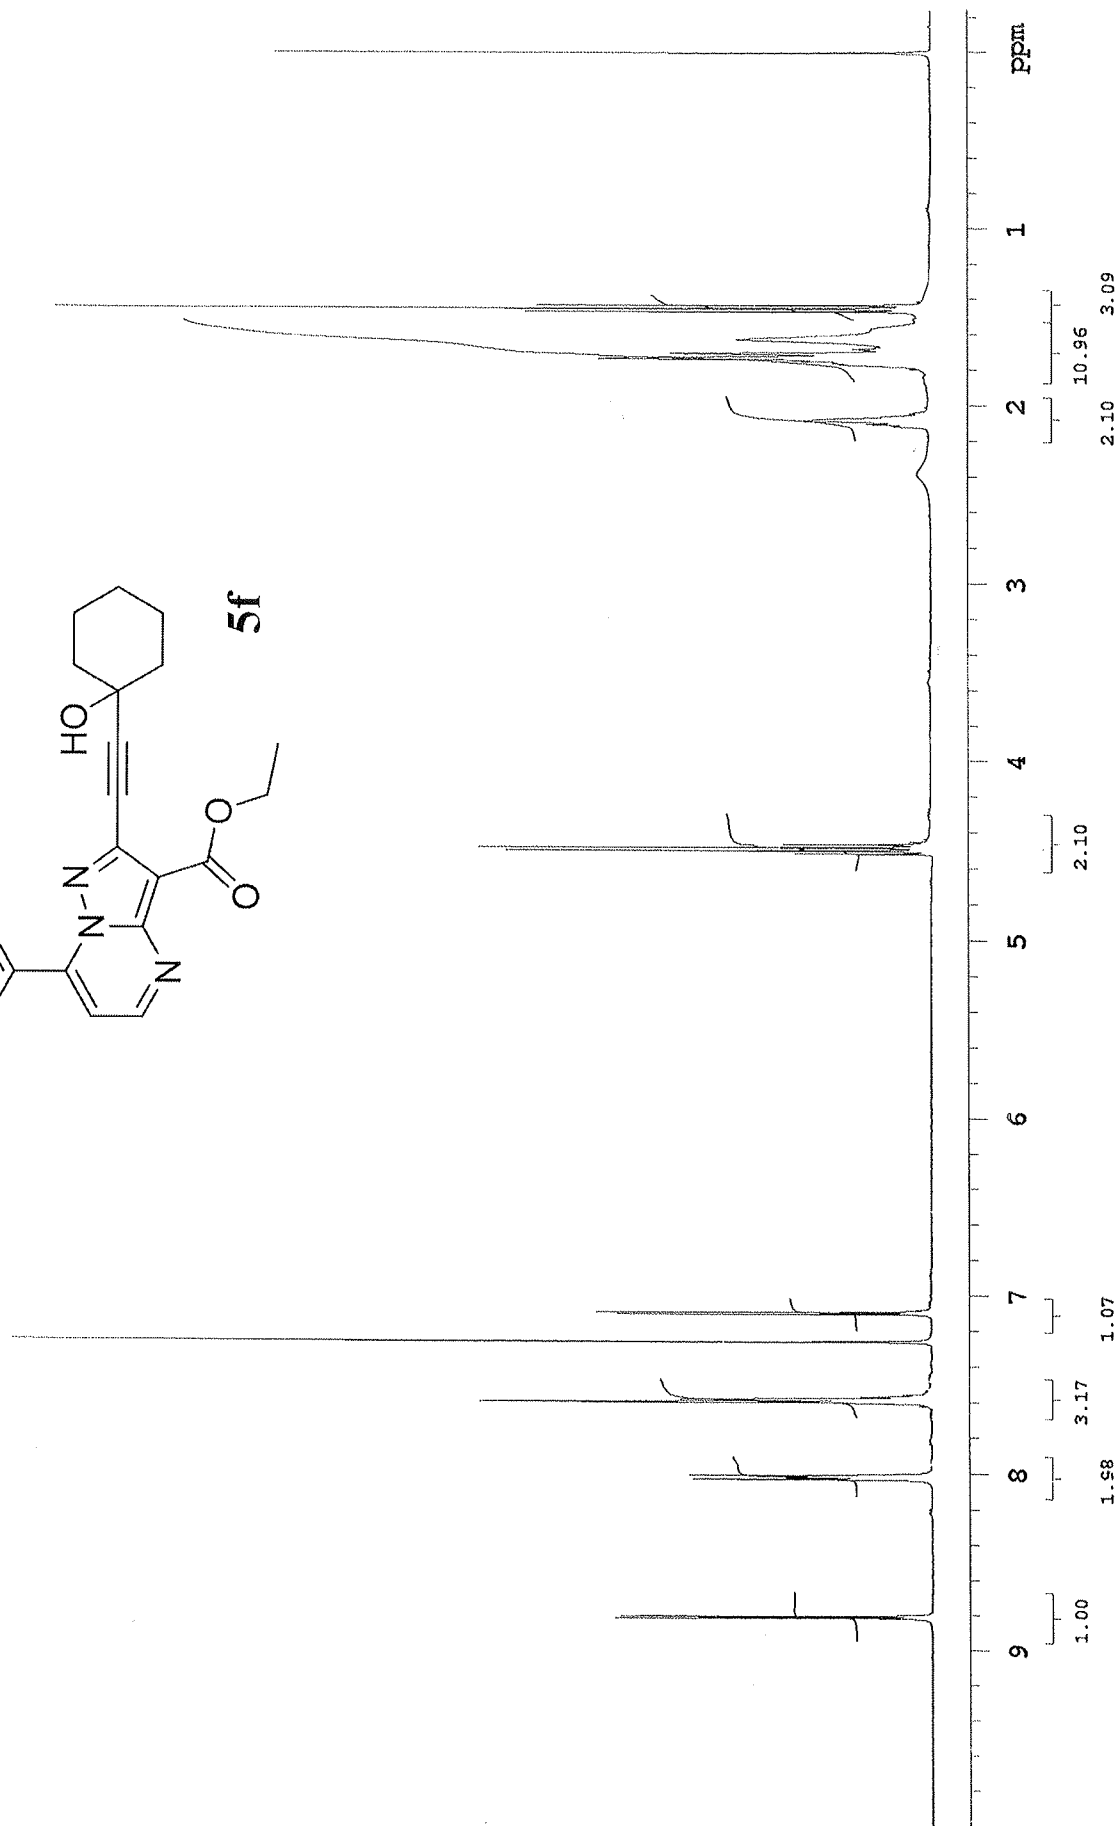

# Copies of NMR spectra

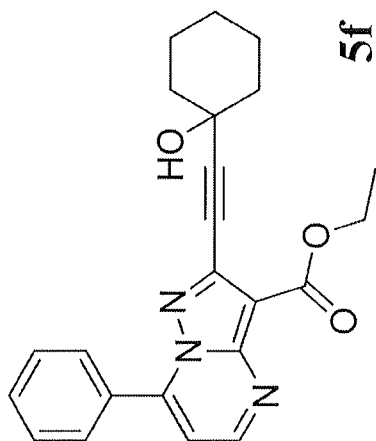

NMR-400 in CDCl<sub>3</sub>  
RR.No:ME1010/1139  
Date:13th Oct.2010

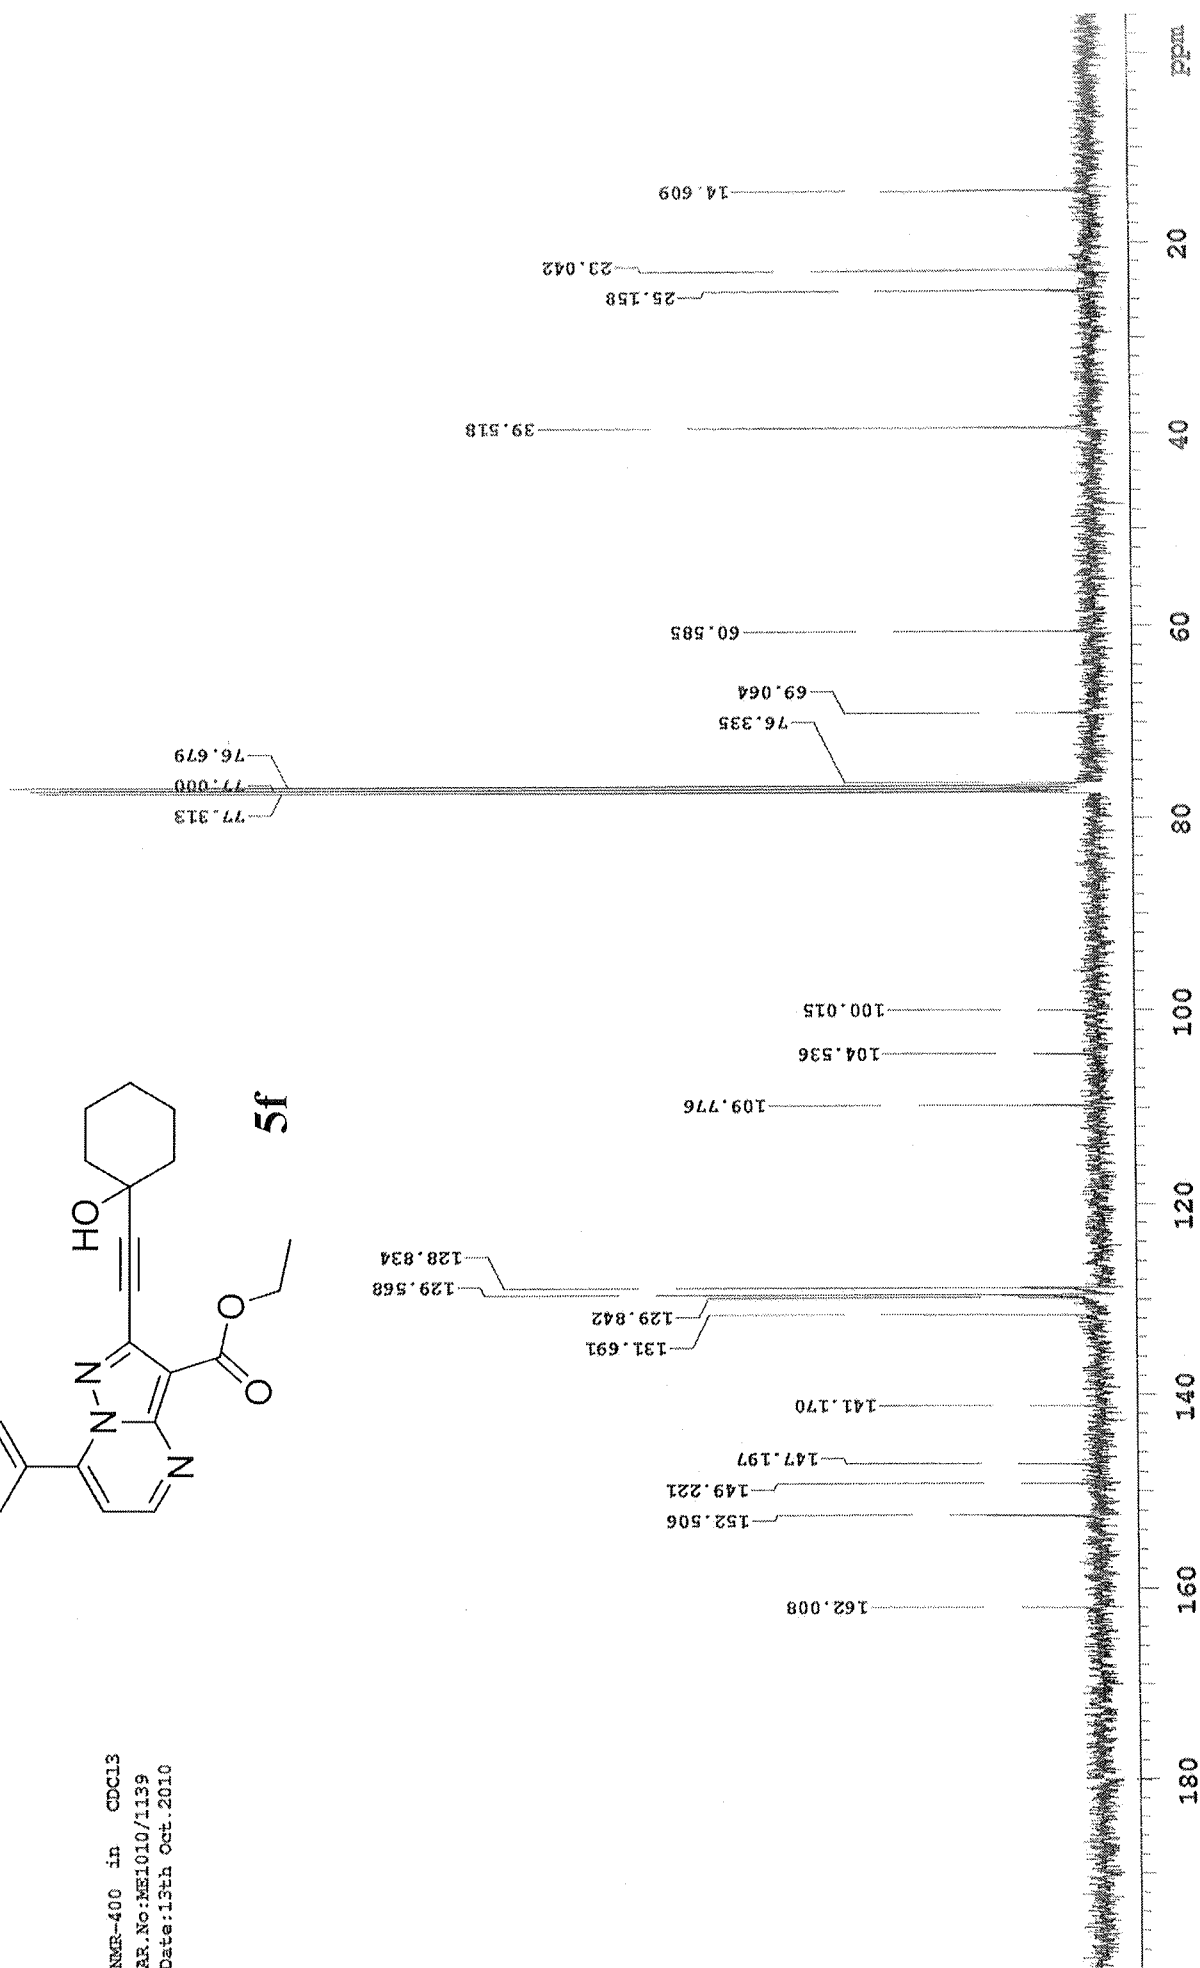

# Copies of NMR spectra

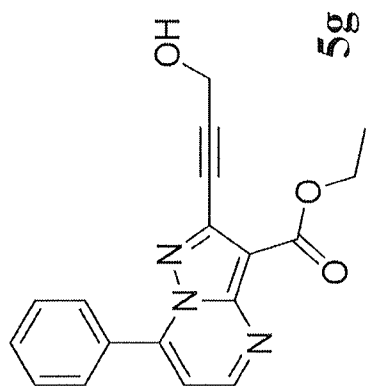

NMR-400 in CDCl<sub>3</sub>  
AR.No:MF1010/60  
Date: 01 st Oct 2010

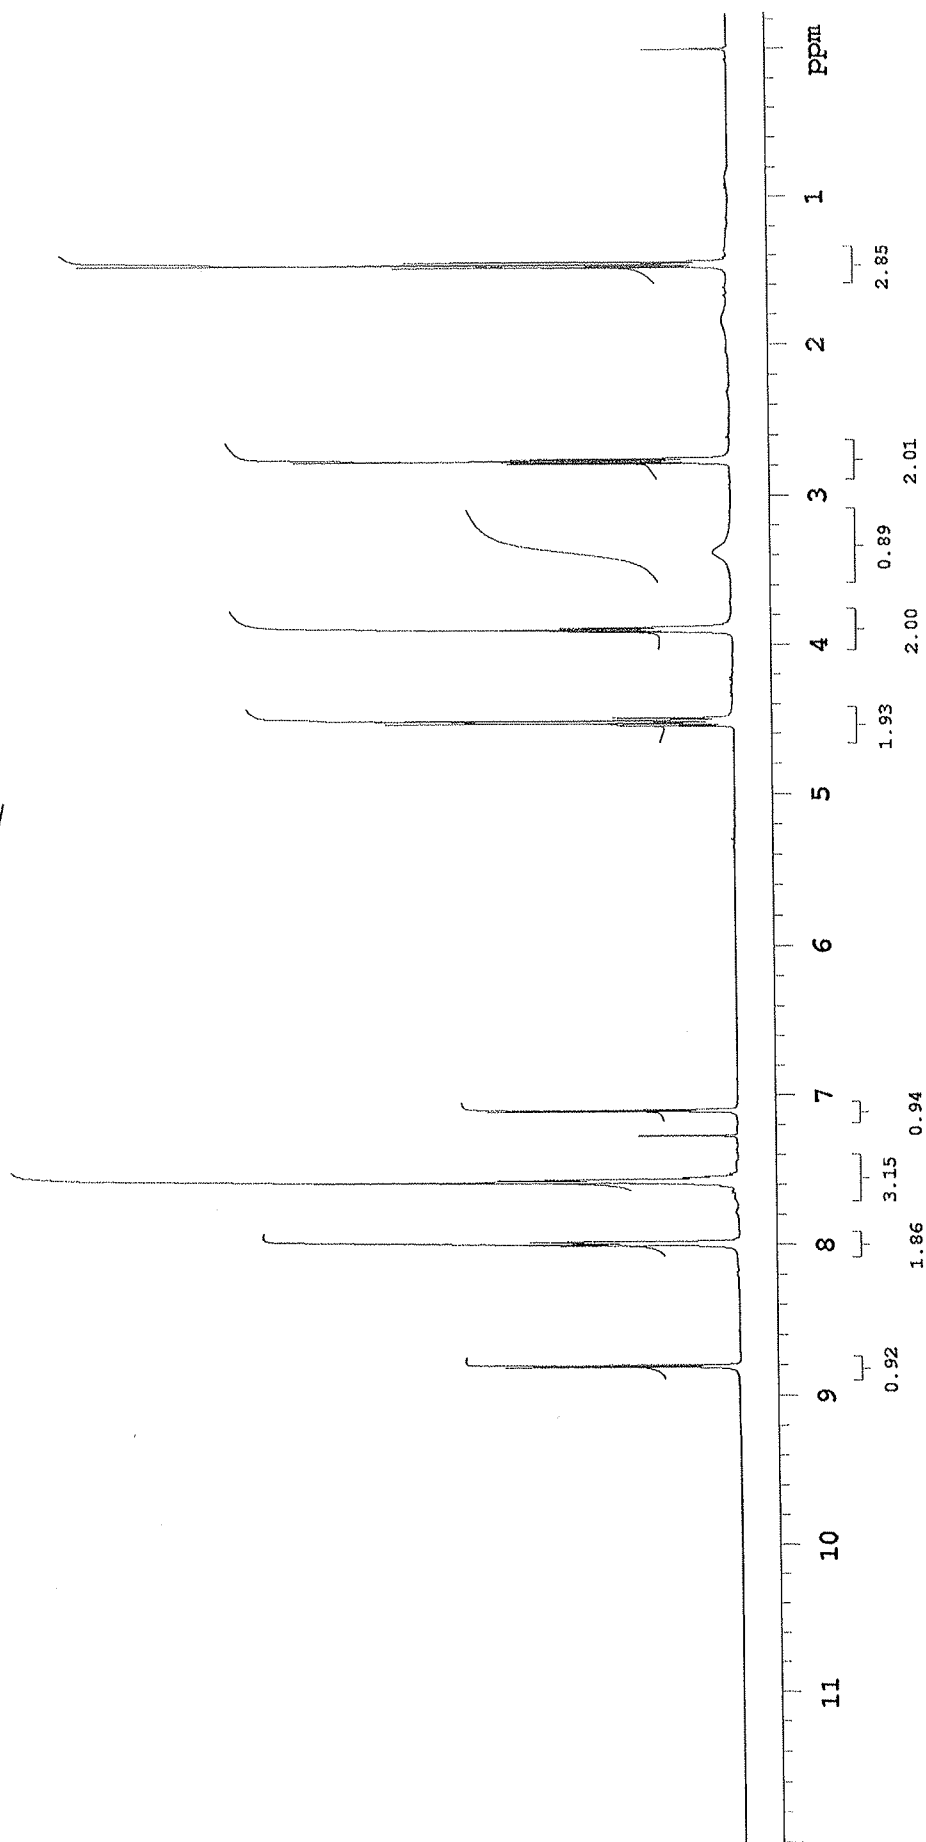

### Copies of NMR spectra

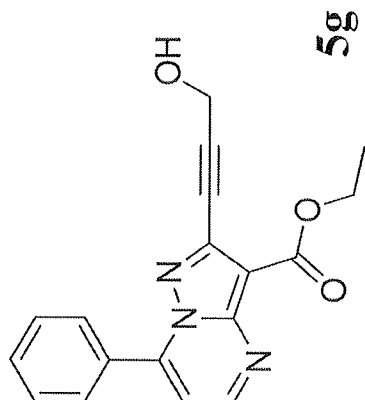

NMR-400 in CDCl3  
AR.No:ME1010/1138  
Date:13th Oct.2010

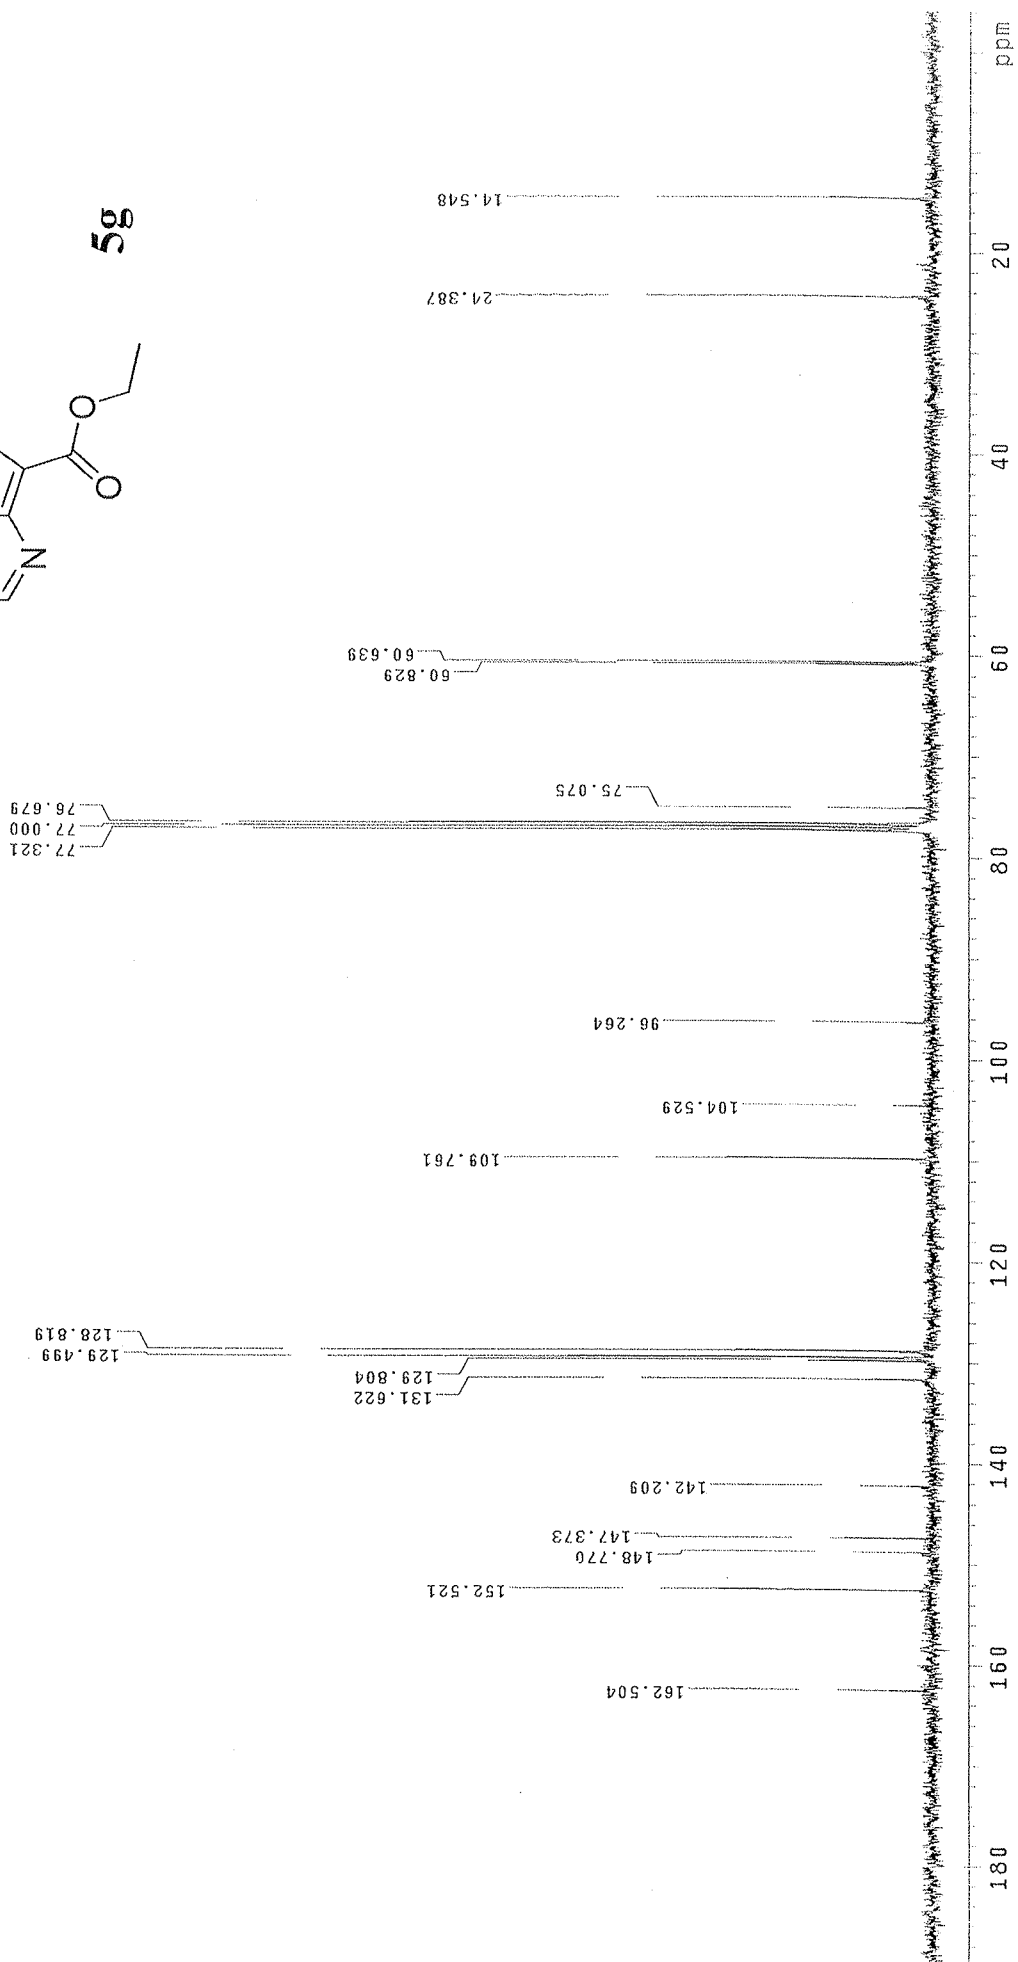



# Copies of NMR spectra

NMR-400 in CDCl<sub>3</sub>  
AR.No:ME1010/01  
Date: 01 st Oct 2010

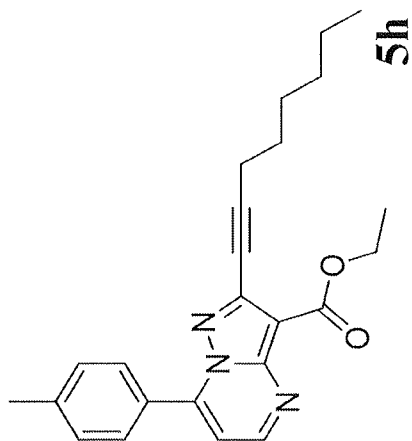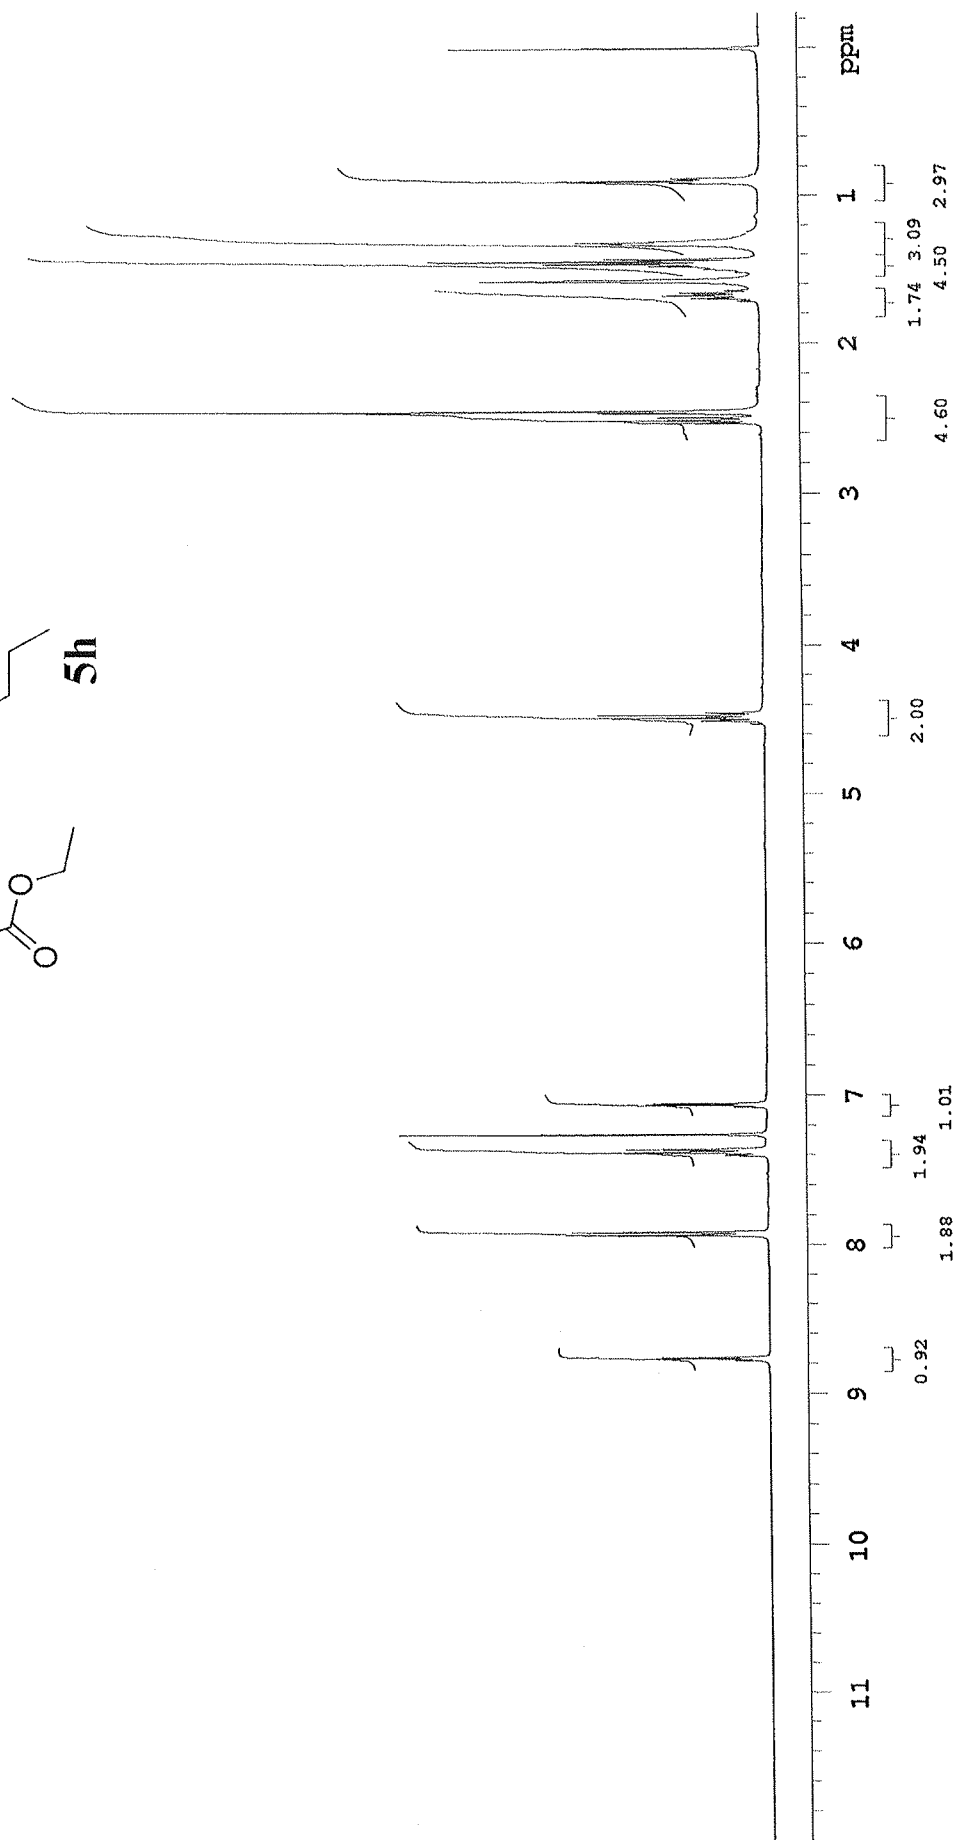

### Copies of NMR spectra

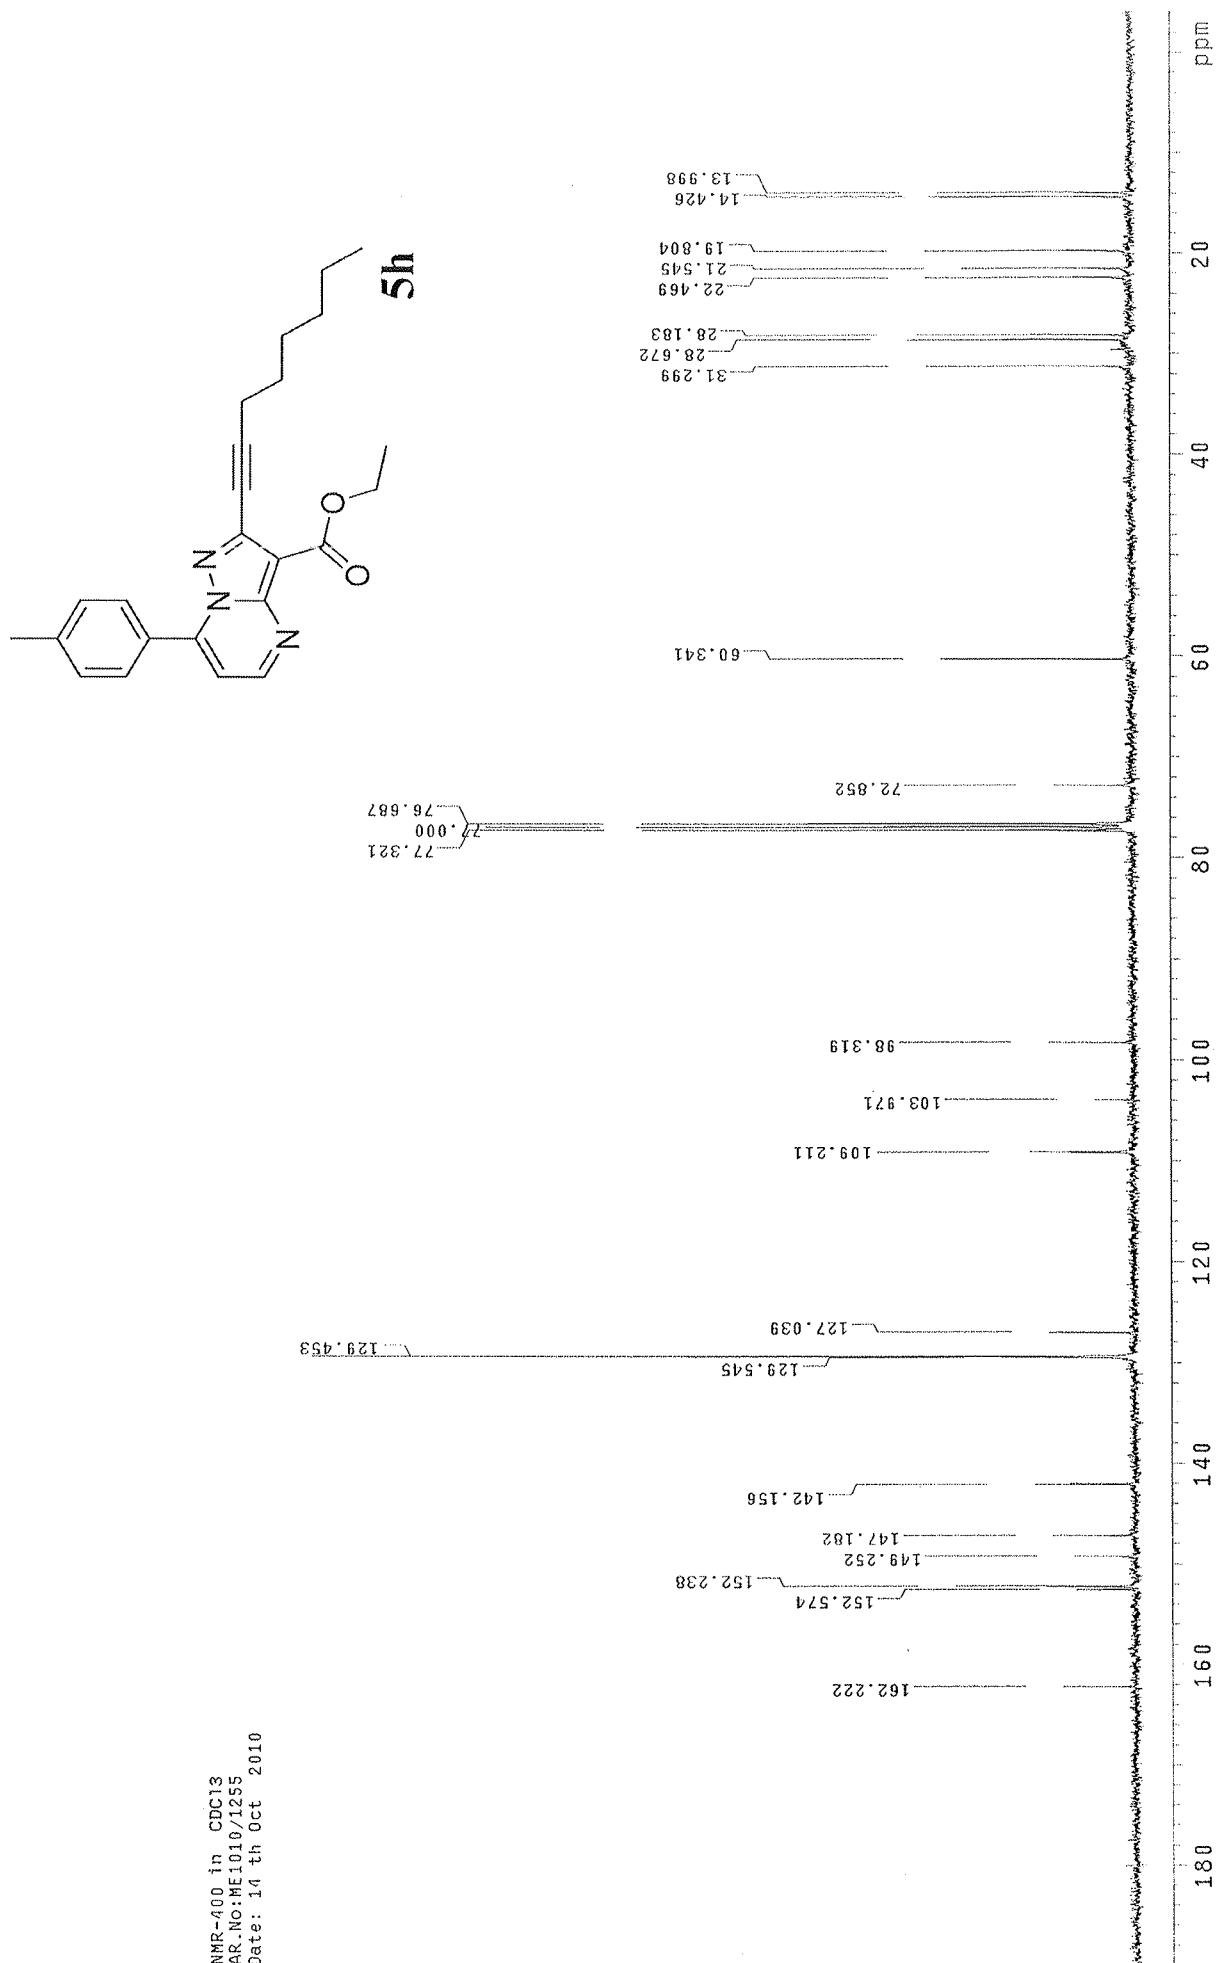

NMR-400 in CDCl3  
AR.NO:ME1010/1255  
Date: 14 th Oct 2010

# Copies of NMR spectra

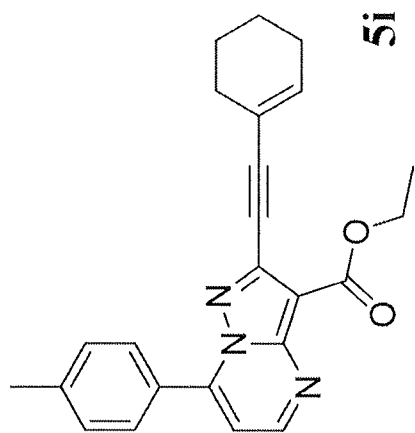

NMR-400 in CDCl<sub>3</sub>  
AR.No:ME1010/851  
Date: 11 th Oct 2010

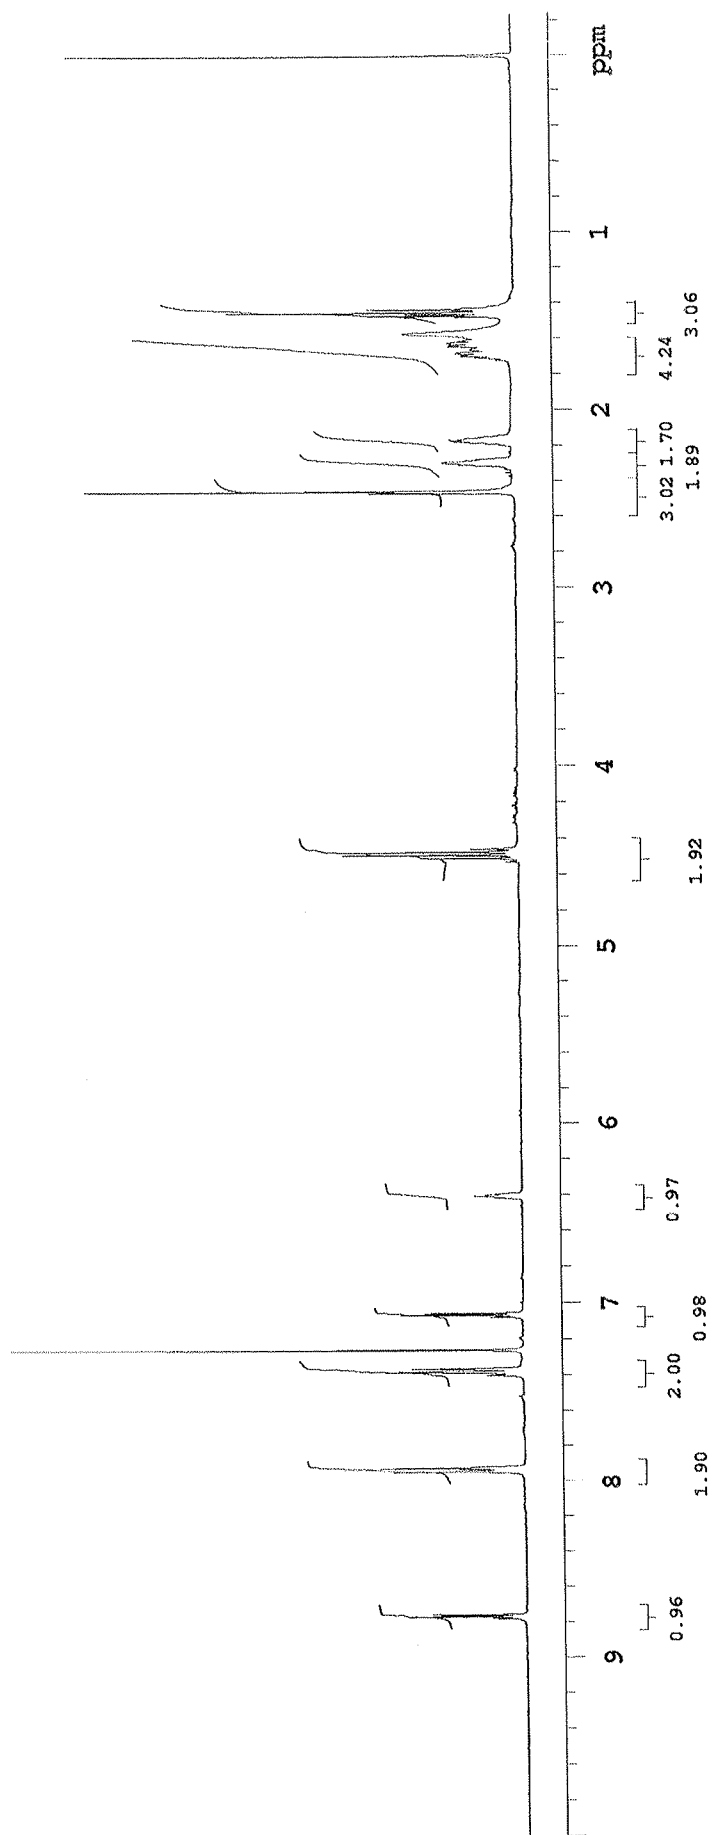

### Copies of NMR spectra

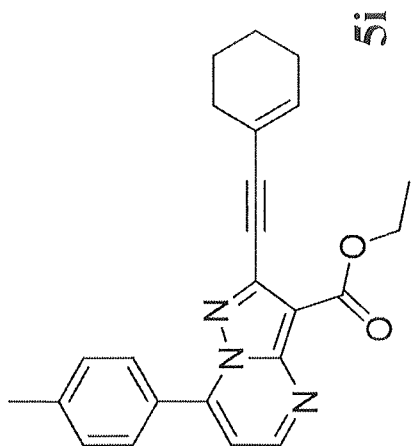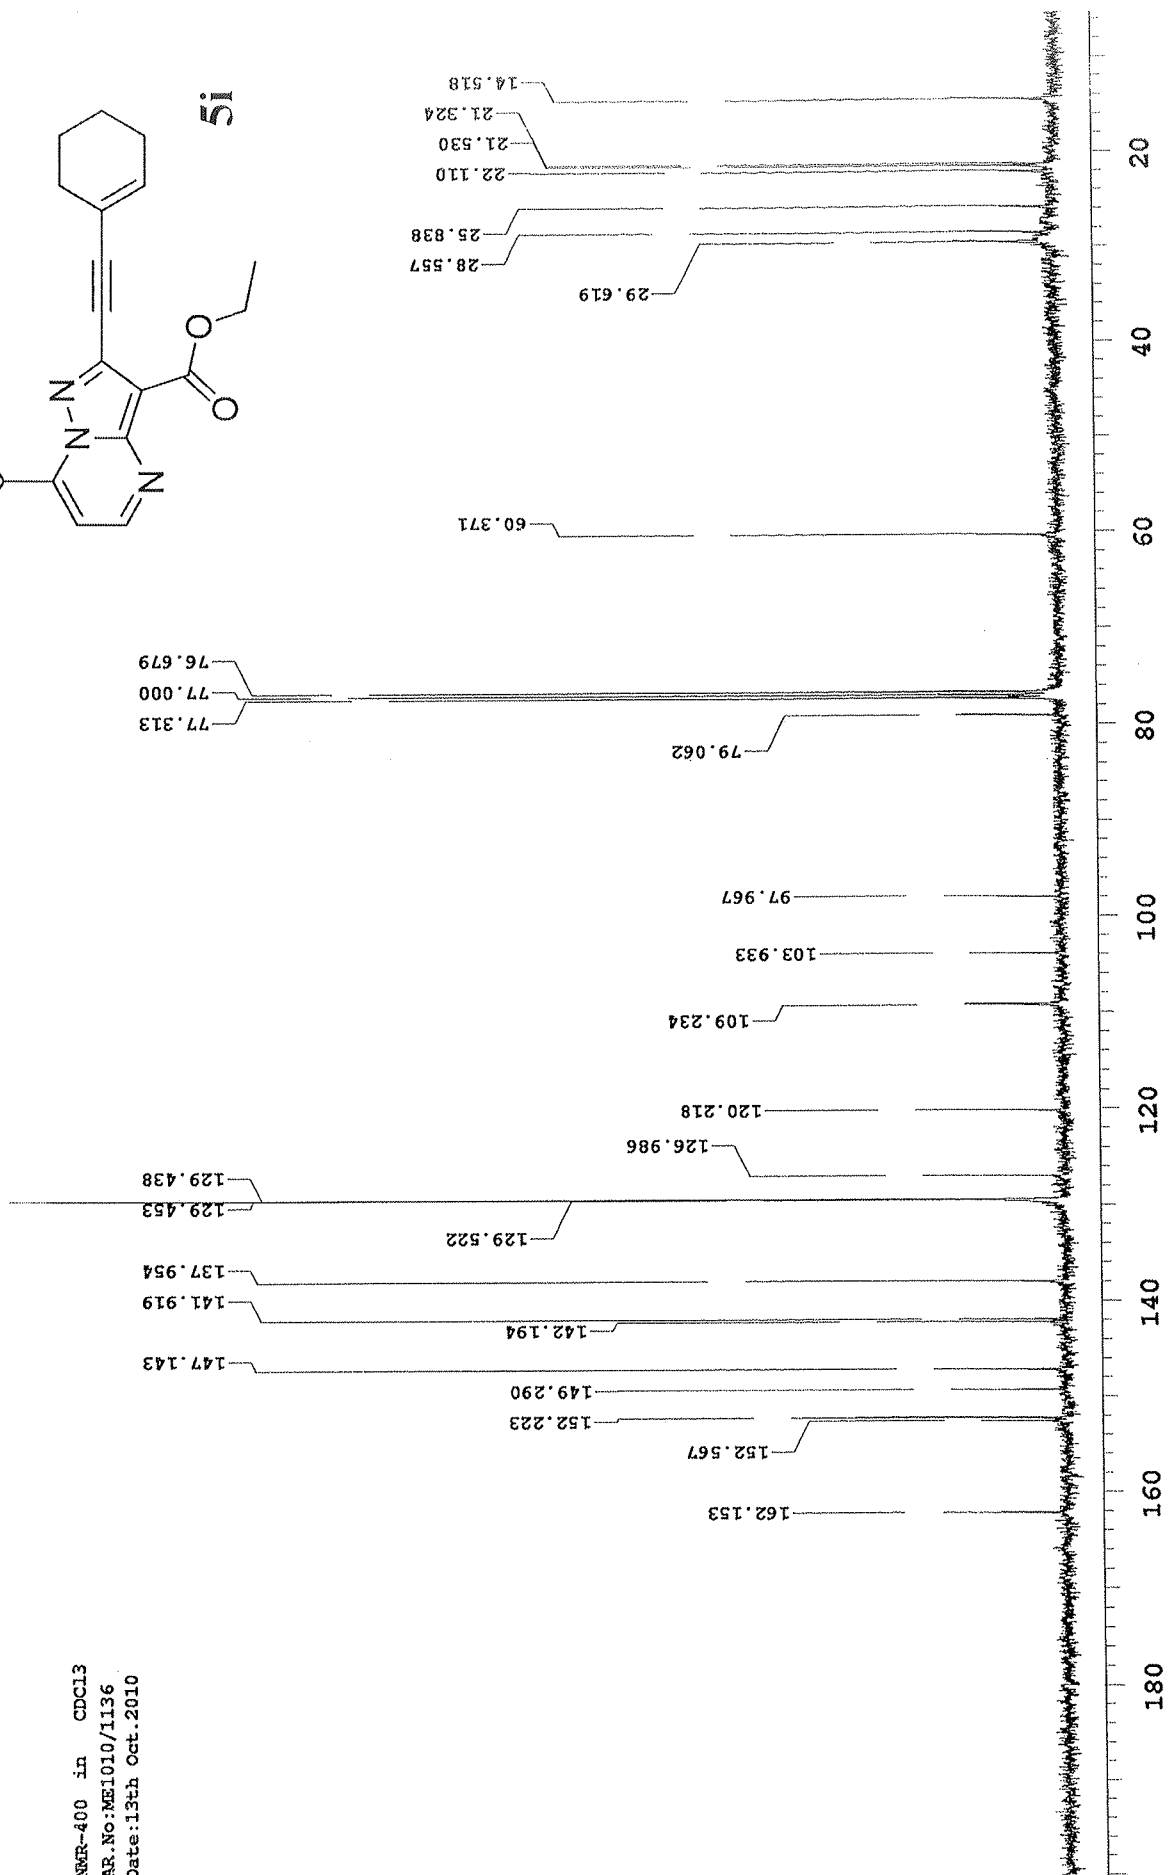

NMR-400 in CDCl<sub>3</sub>  
AP.No:ME1010/1136  
Date:13th Oct.2010

### Copies of NMR spectra

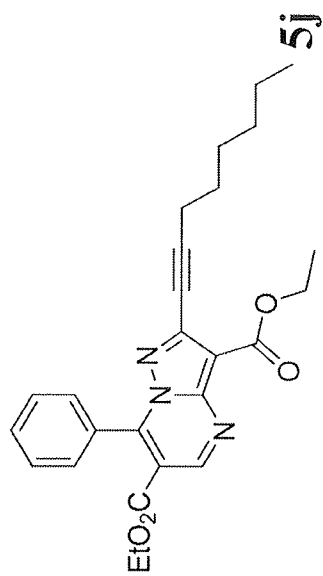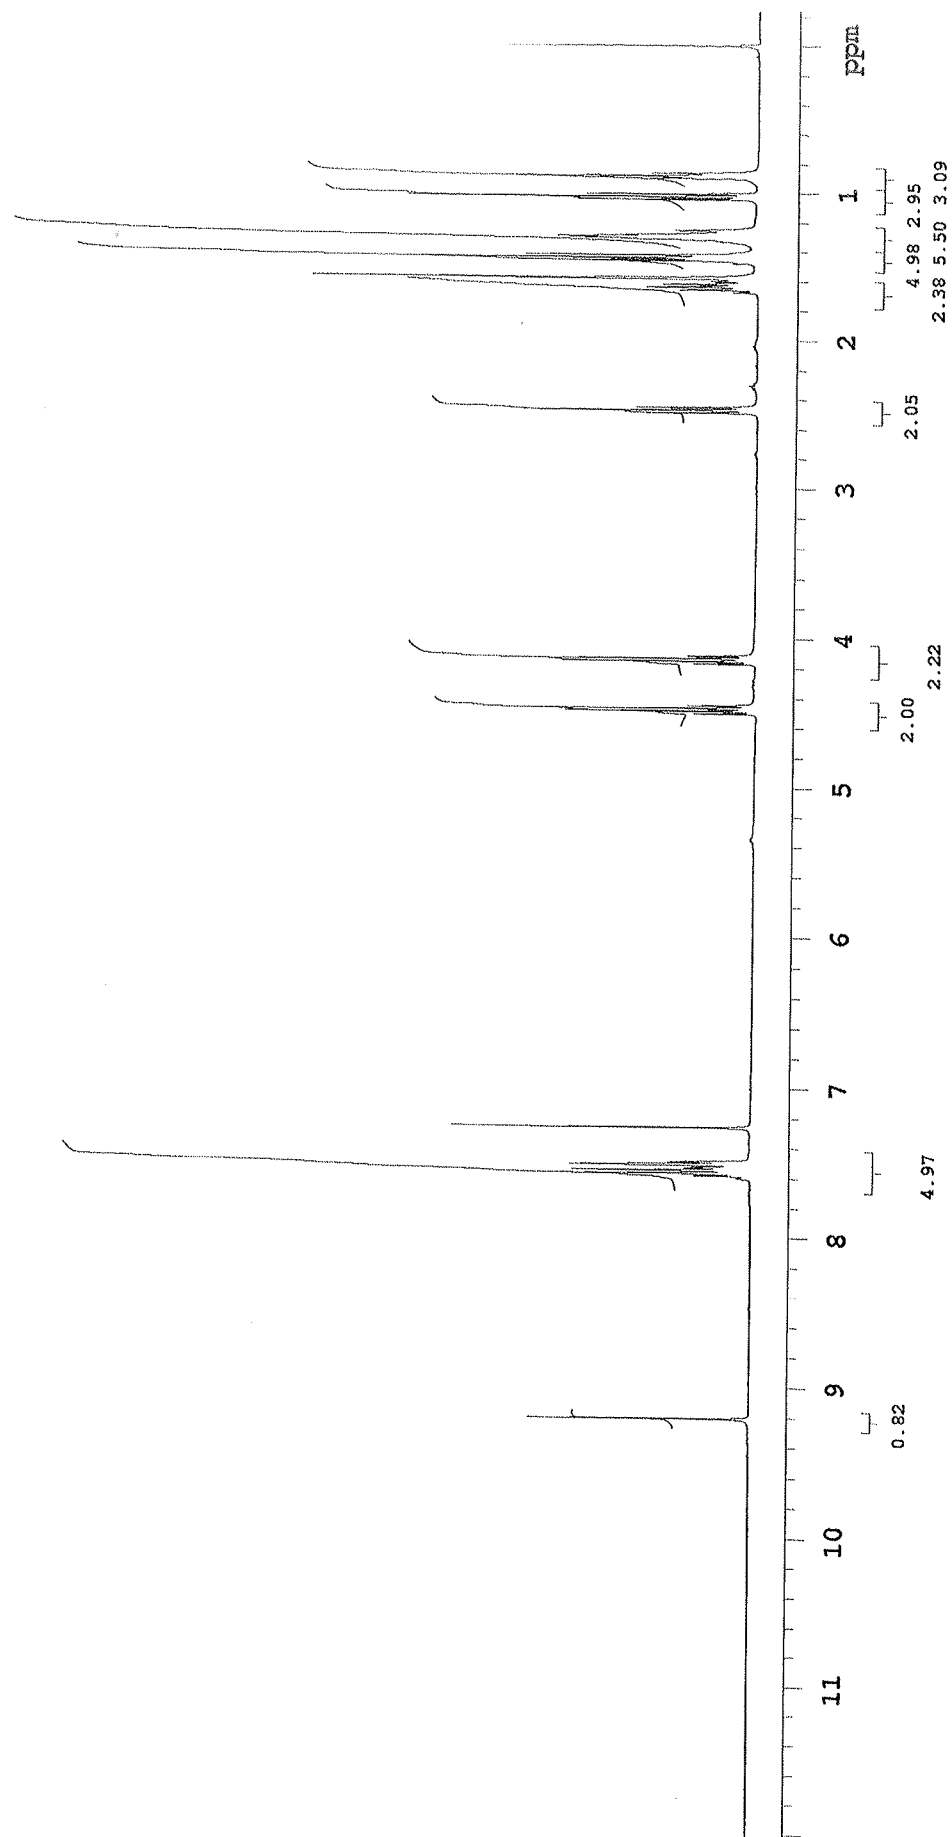

NMR-400 in CDCl<sub>3</sub>  
AR.No:ME1010/63  
Date: 01 st Oct 2010

### Copies of NMR spectra

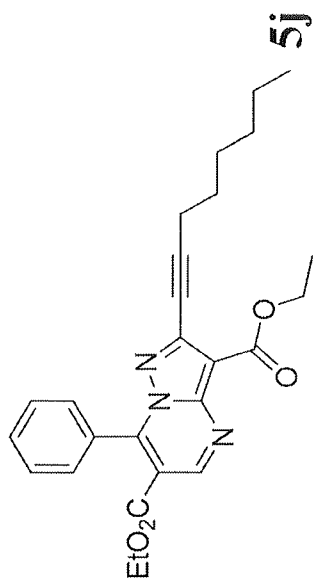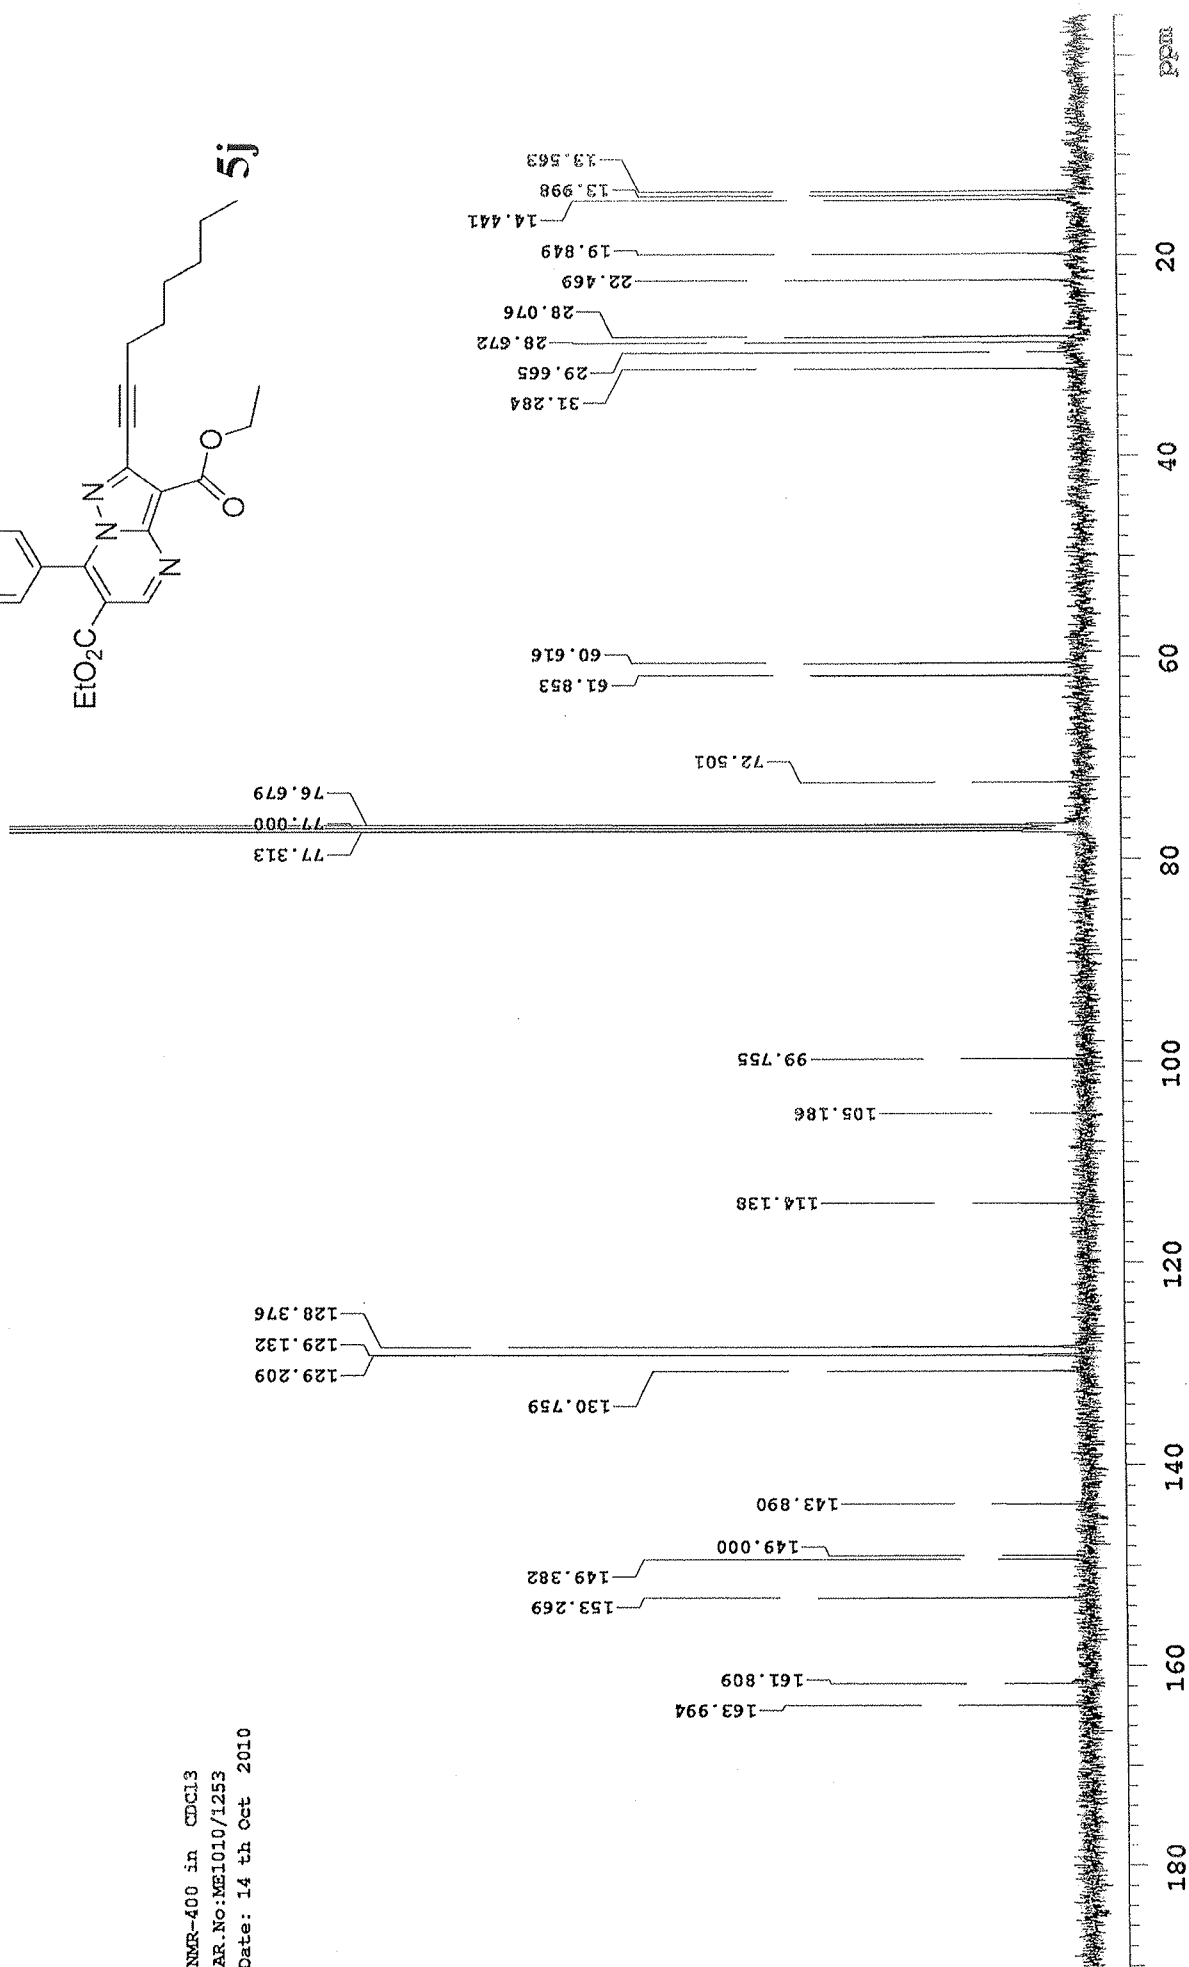

NMR-400 in CDCl<sub>3</sub>  
AR.No:ME1010/1253  
Date: 14 th Oct 2010

### Copies of NMR spectra

AR&D, Aurigene Discovery Technologies Ltd.  
Instrument : Mercury Plus (Varian 400MHz)  
Date & Time : Fri Sep 3 15:09:25 GMT 2010

NMR-400 in CDCl<sub>3</sub>  
AR.No:ME0910/119  
Date: 3rd Sept 2010

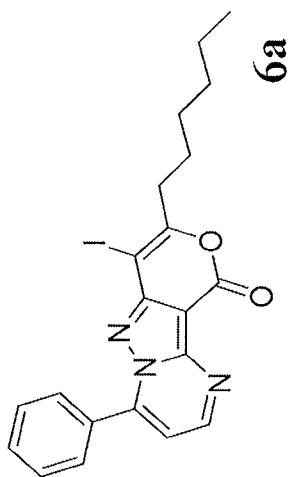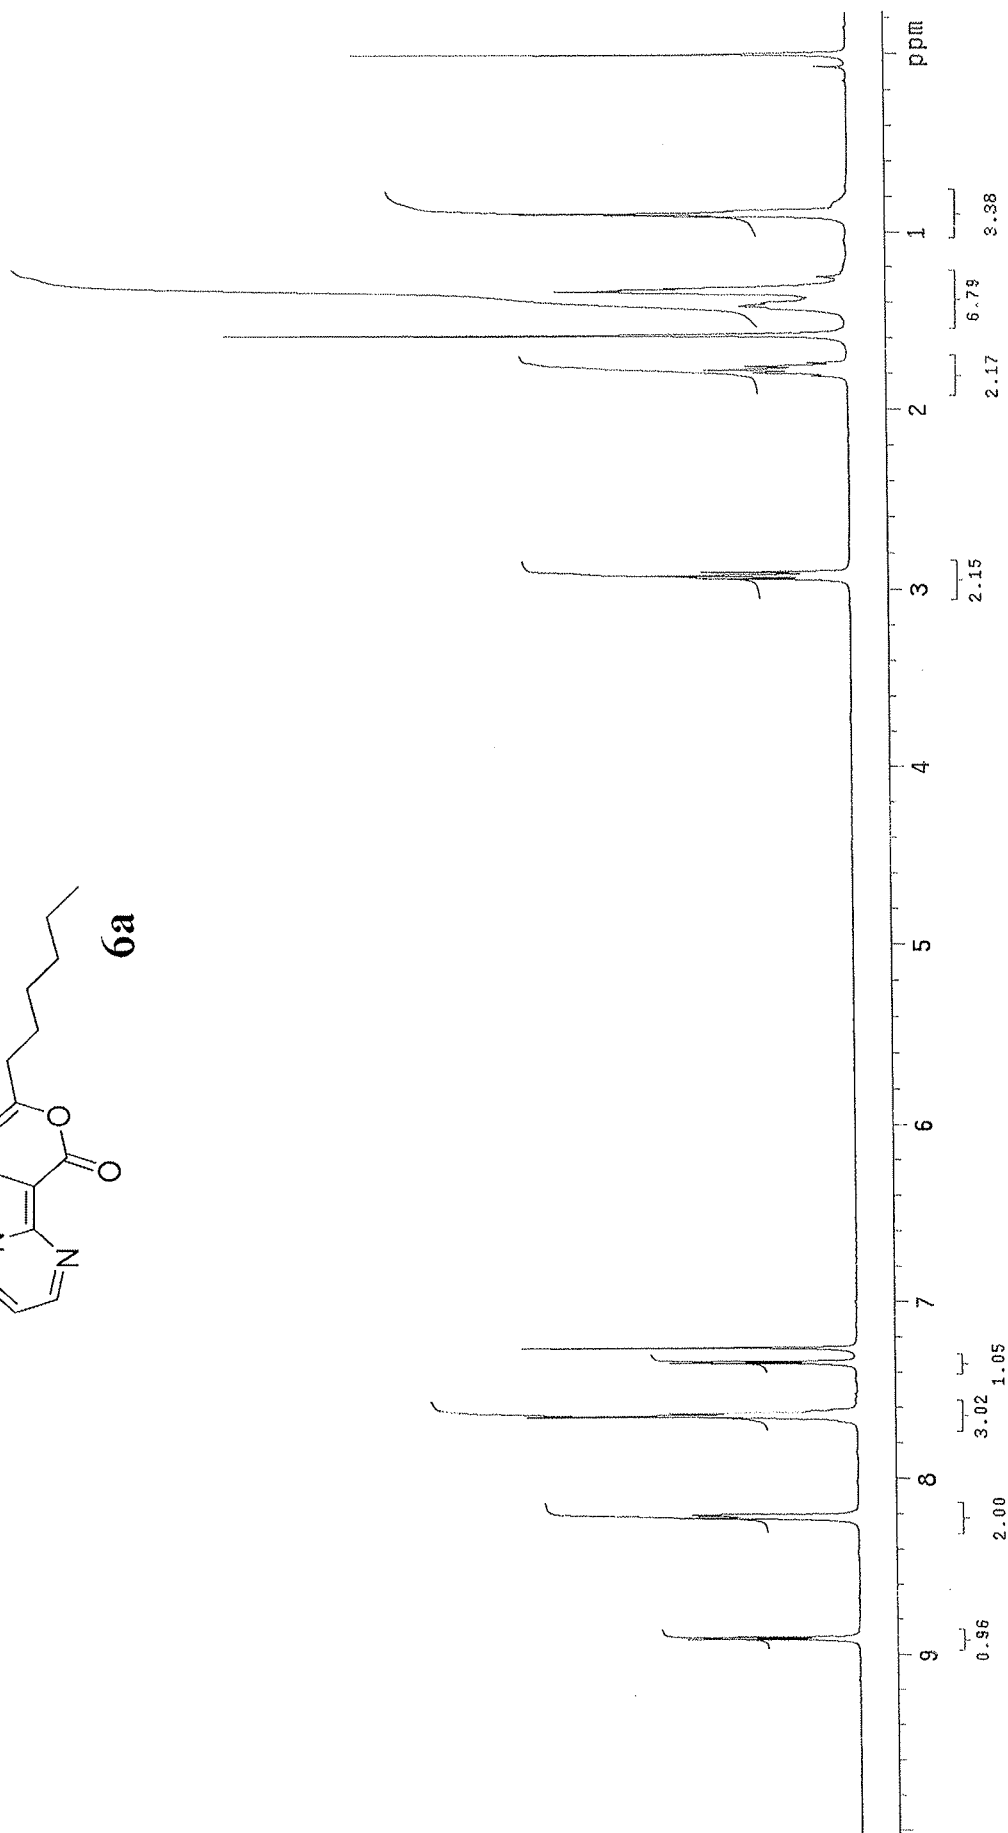

### Copies of NMR spectra

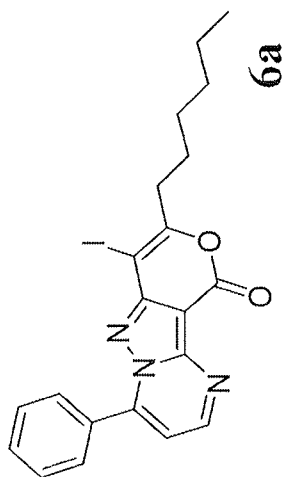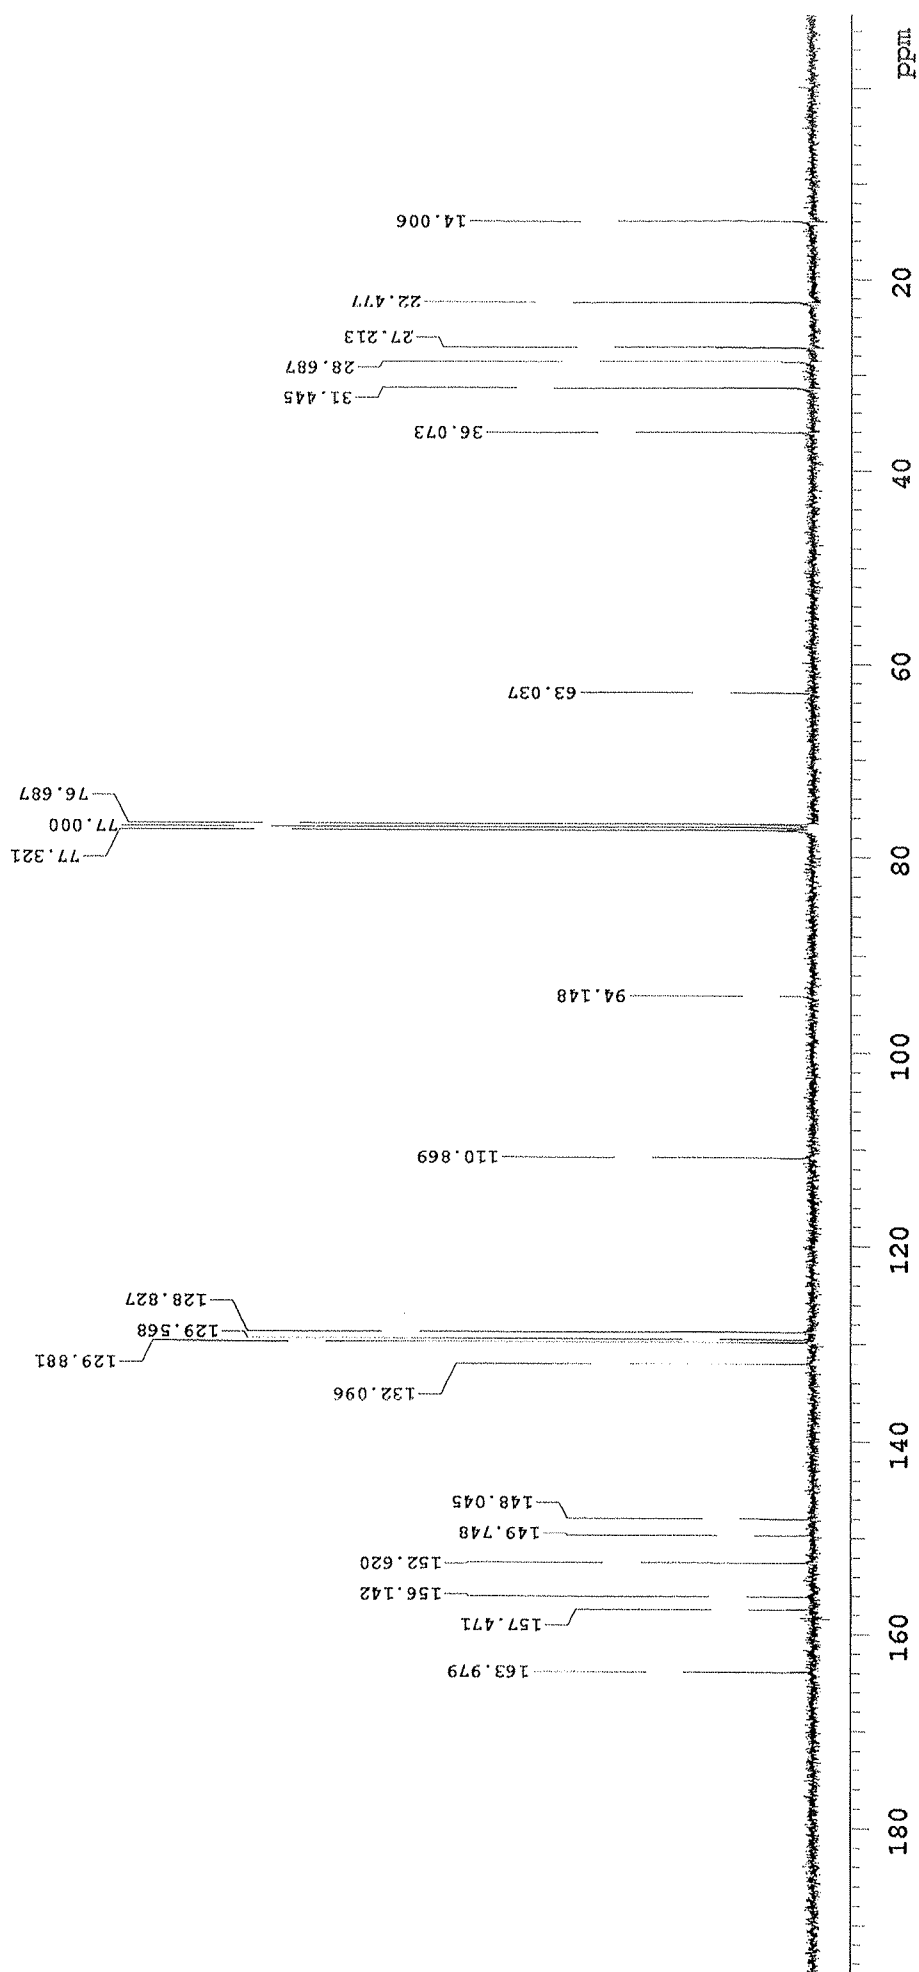

NMR-400 in CDCl<sub>3</sub>  
AR.No:ME0910/1423  
Date:24th Sept 2010



### Copies of NMR spectra

NMR: 400MHz CDC13  
AR.No: IN0910/555  
Date:24th Sept.2010

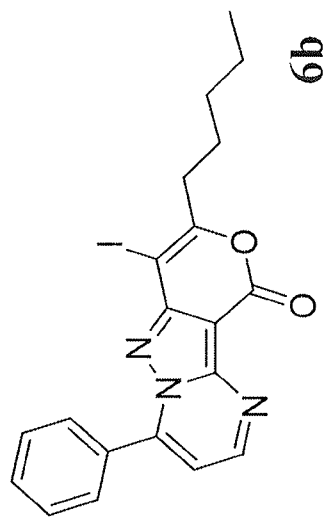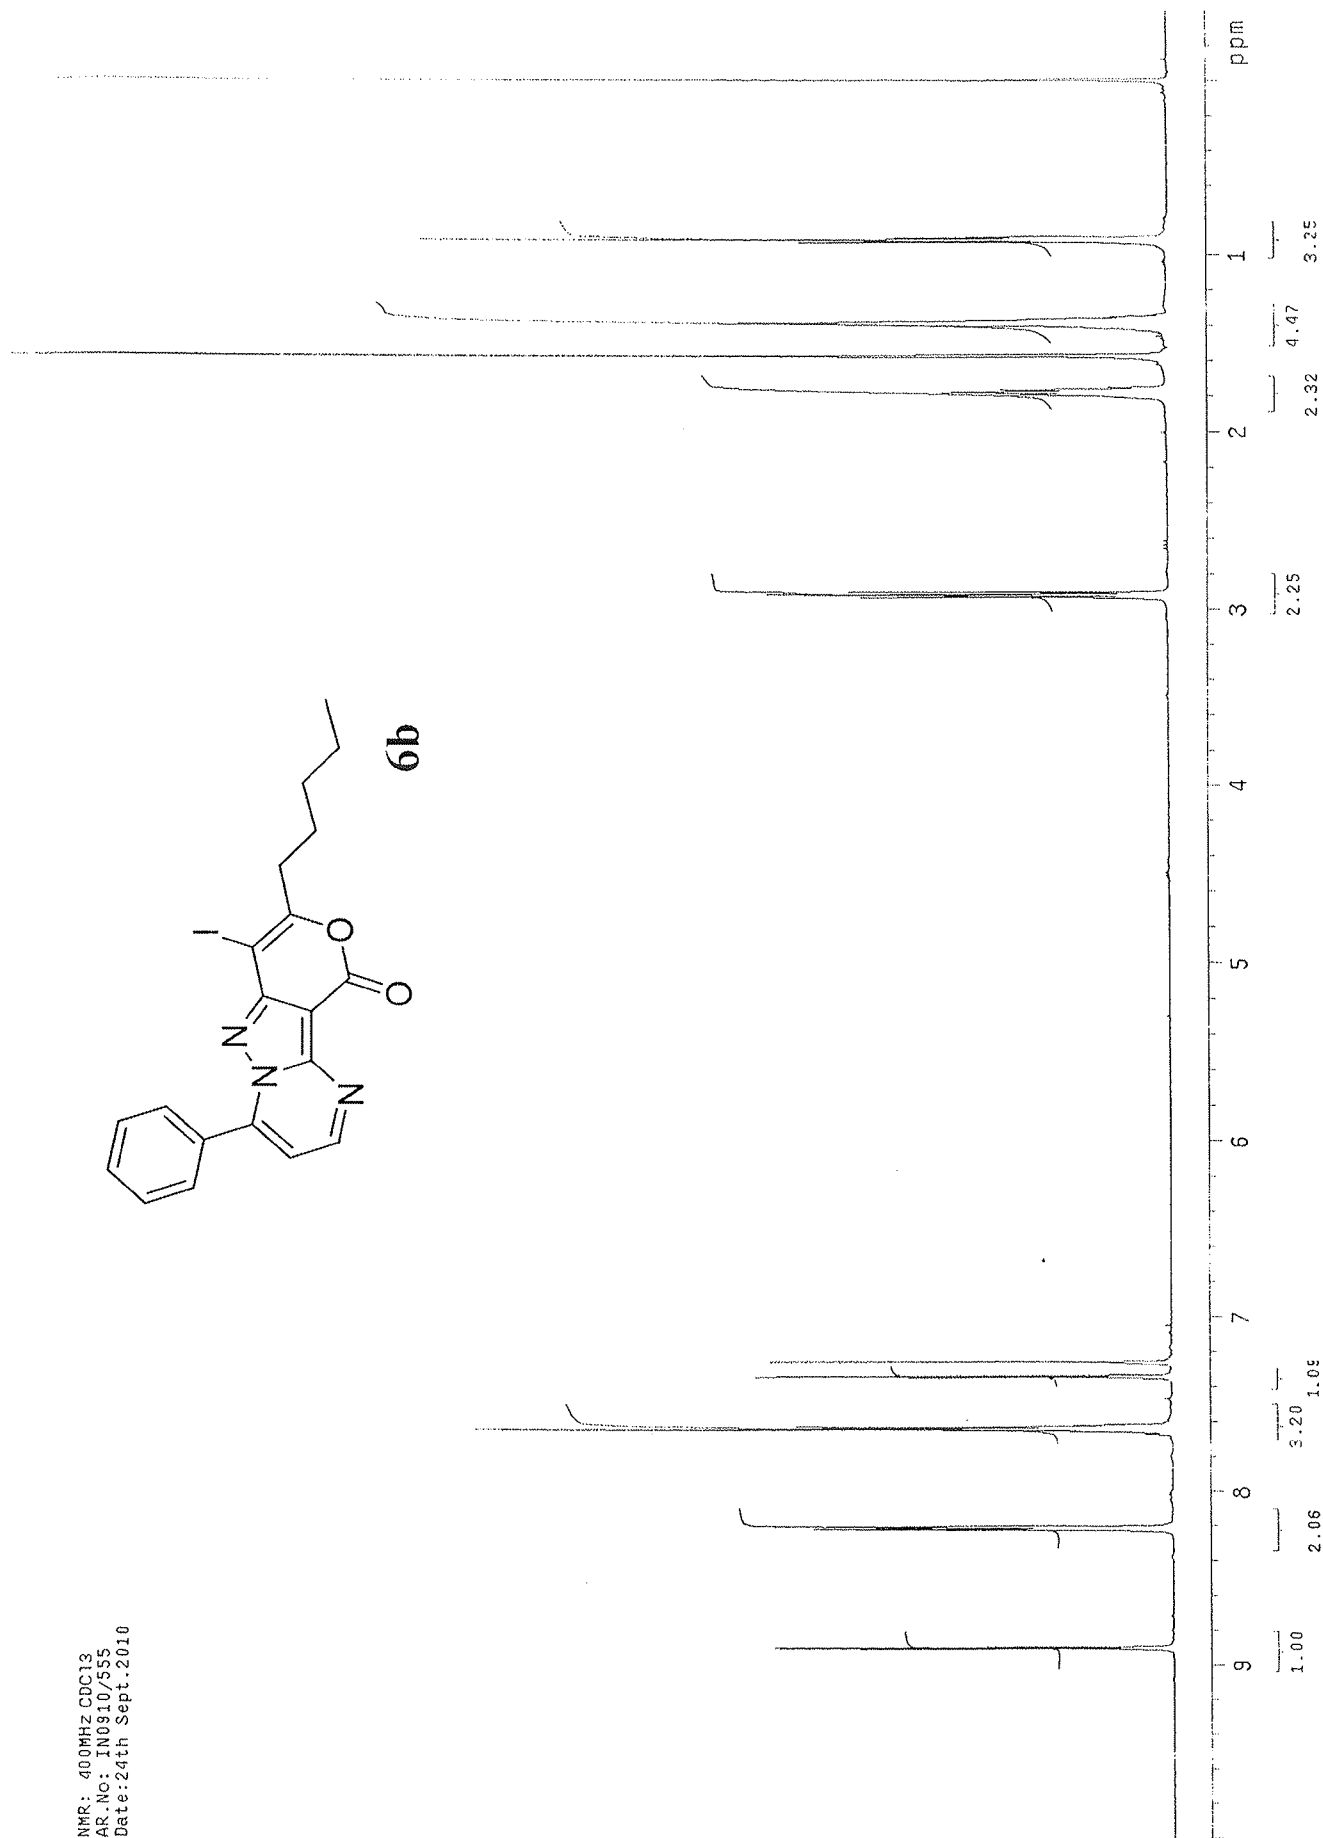

### Copies of NMR spectra

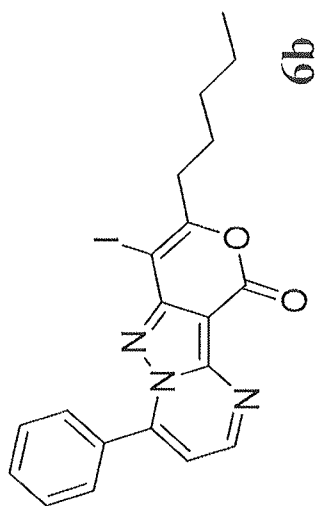

NMR-400 in CDCl3  
AR.No:ME0910/1426  
Date:24th Sept 2010

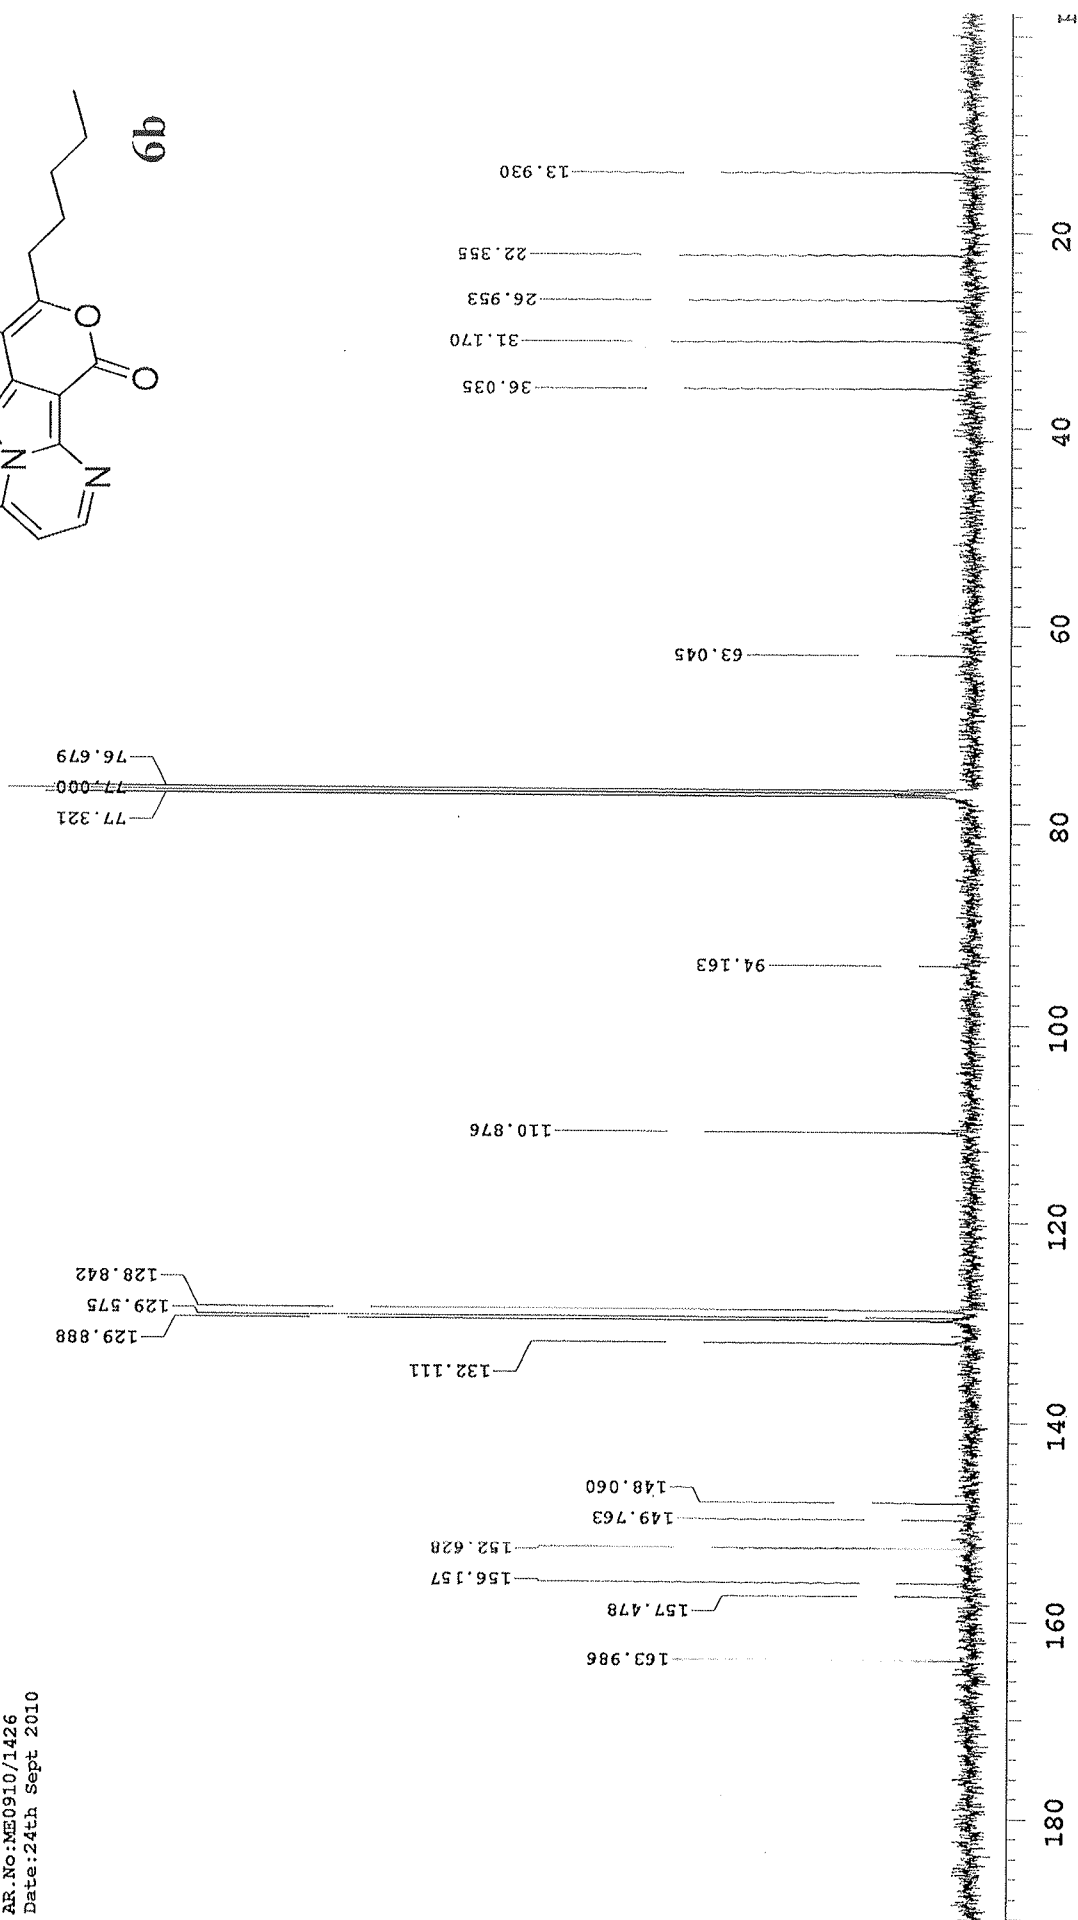

# Copies of NMR spectra

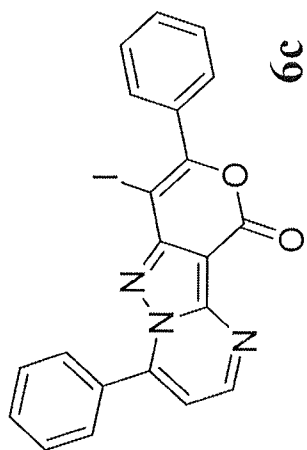

NMR-400 in CDCl<sub>3</sub>  
AR.NC:ML1210/1193  
Date: 13 th Dec. 2010

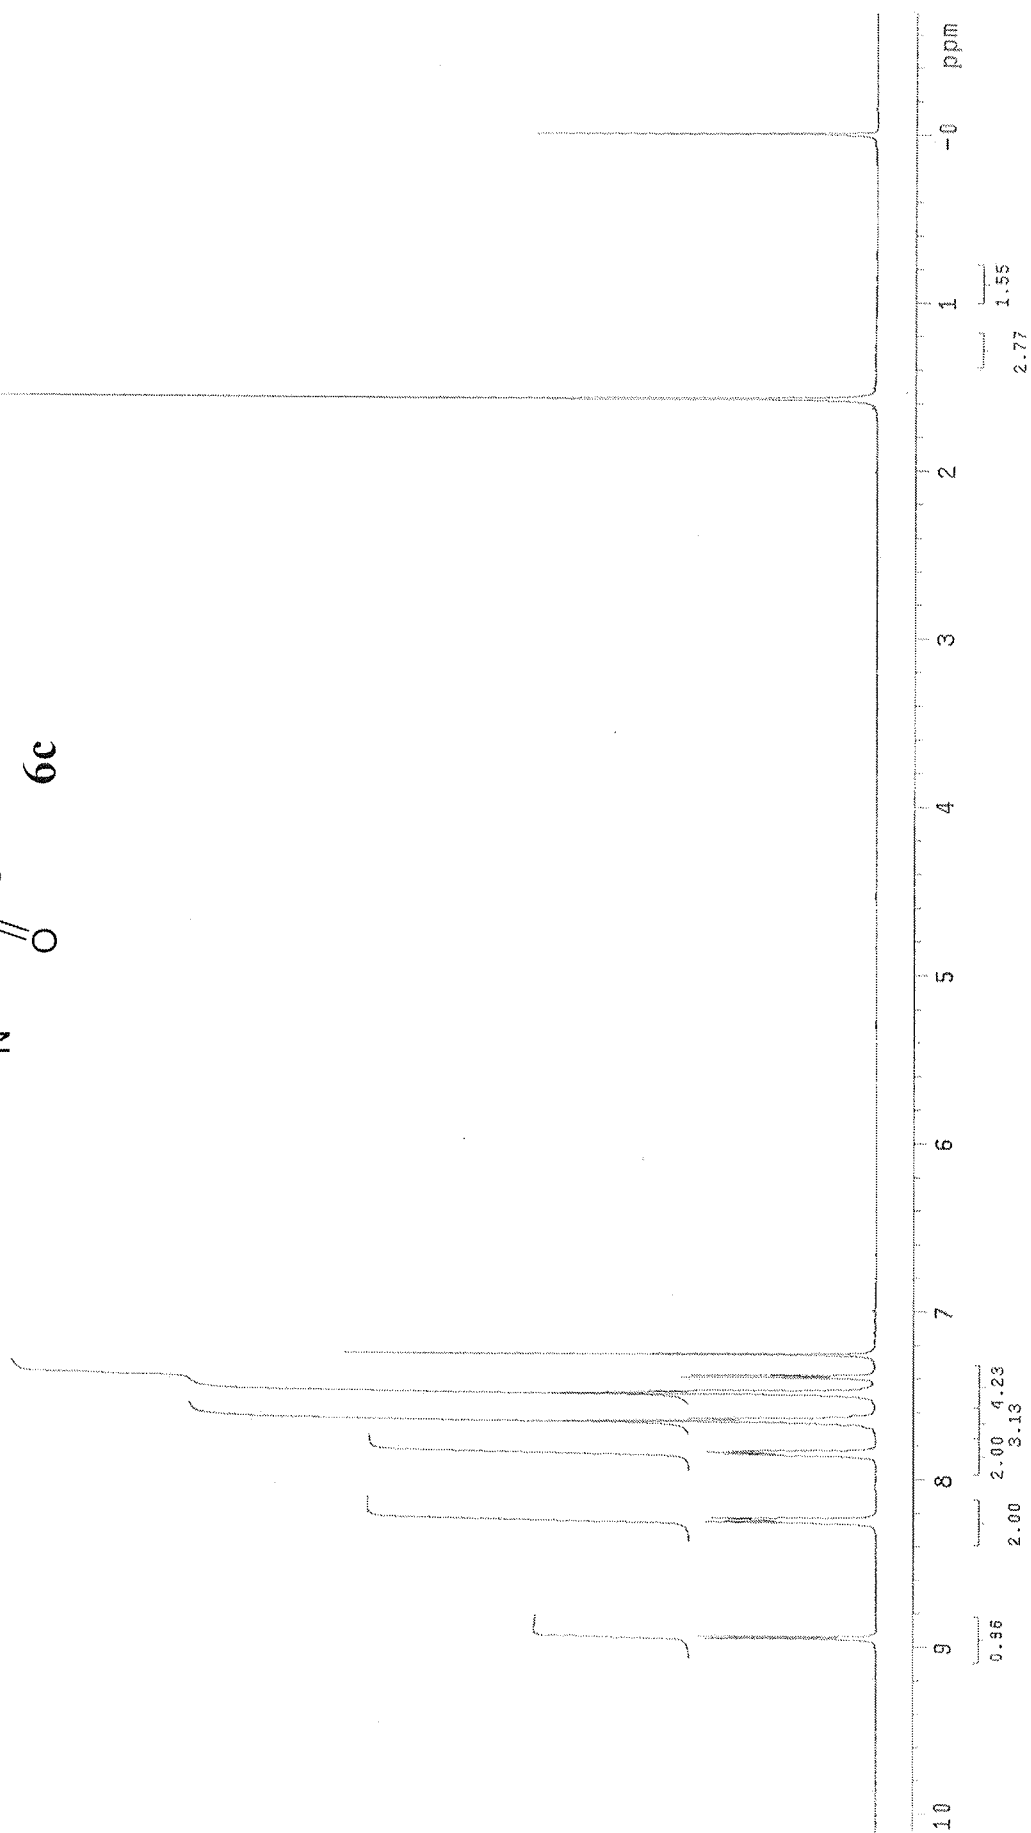

# Copies of NMR spectra

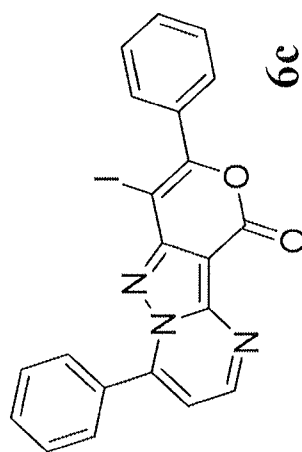

6c

NMR-400 .in CDCl3  
AR.No:ME1010/2217  
Date: 26 th Oct 2010

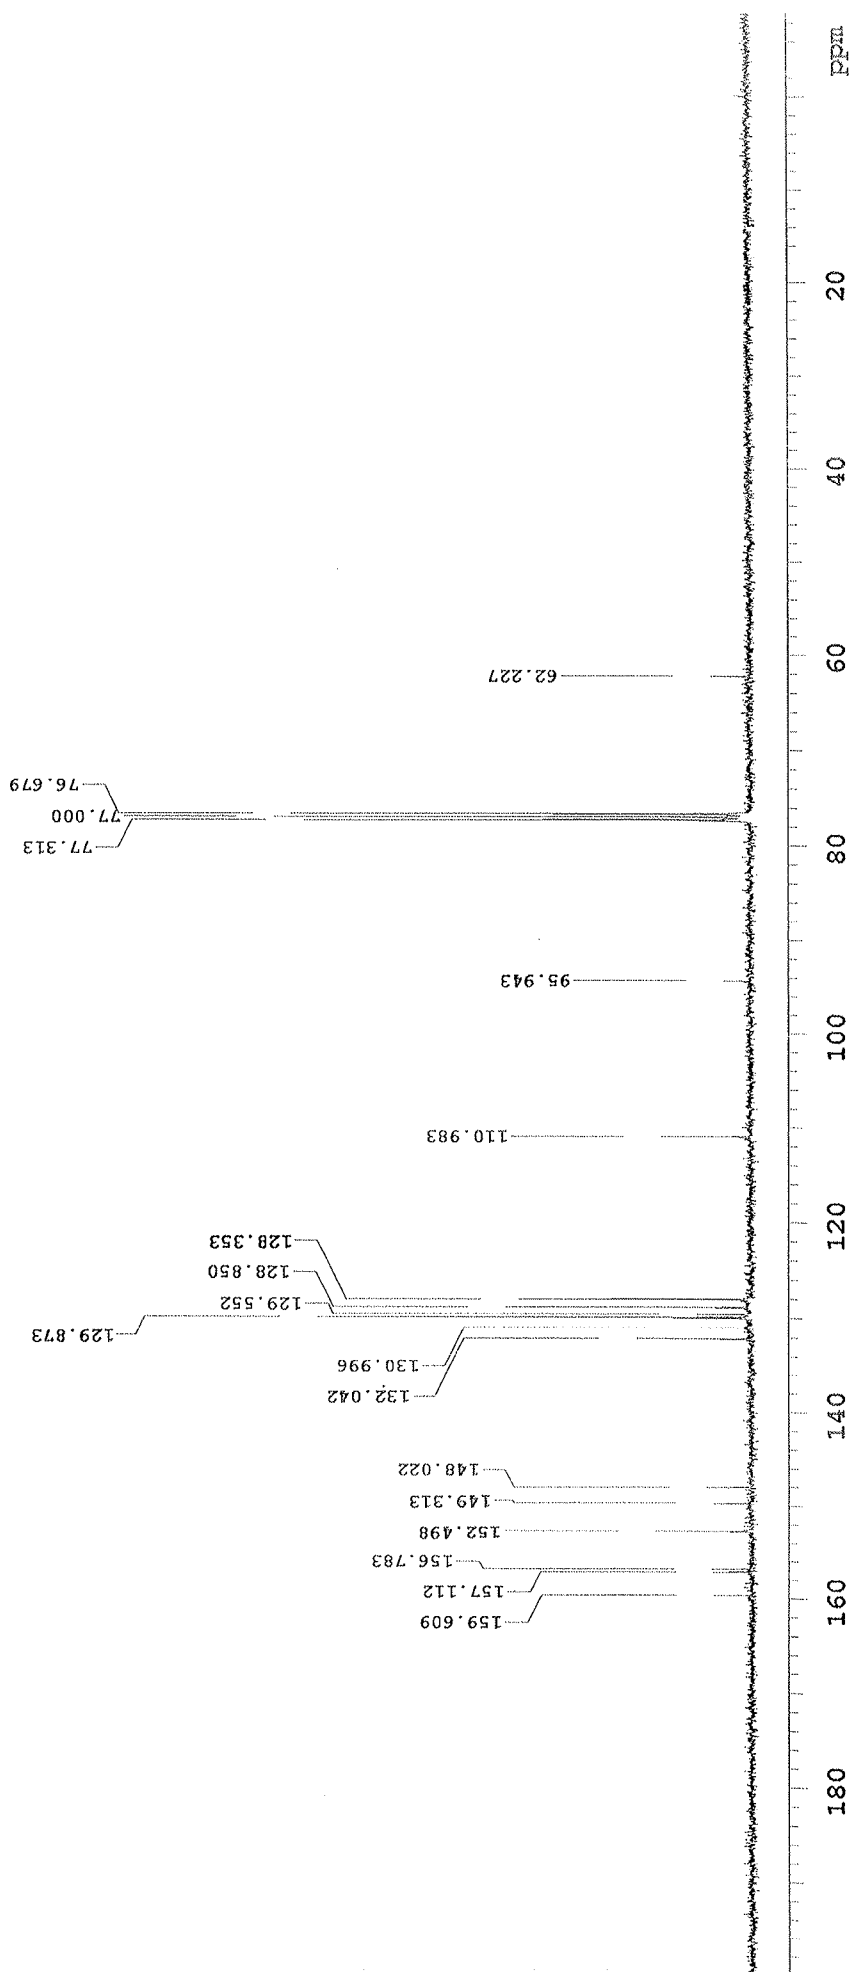

# Copies of NMR spectra

NMR: 400MHz in CDCl3  
AR.No: IN0510/557  
Date:24th Sept. 2010

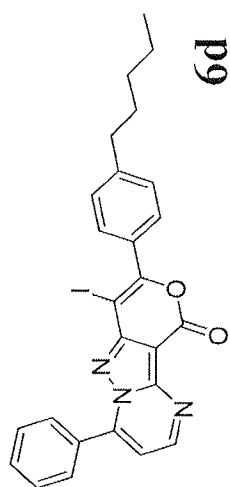

6d

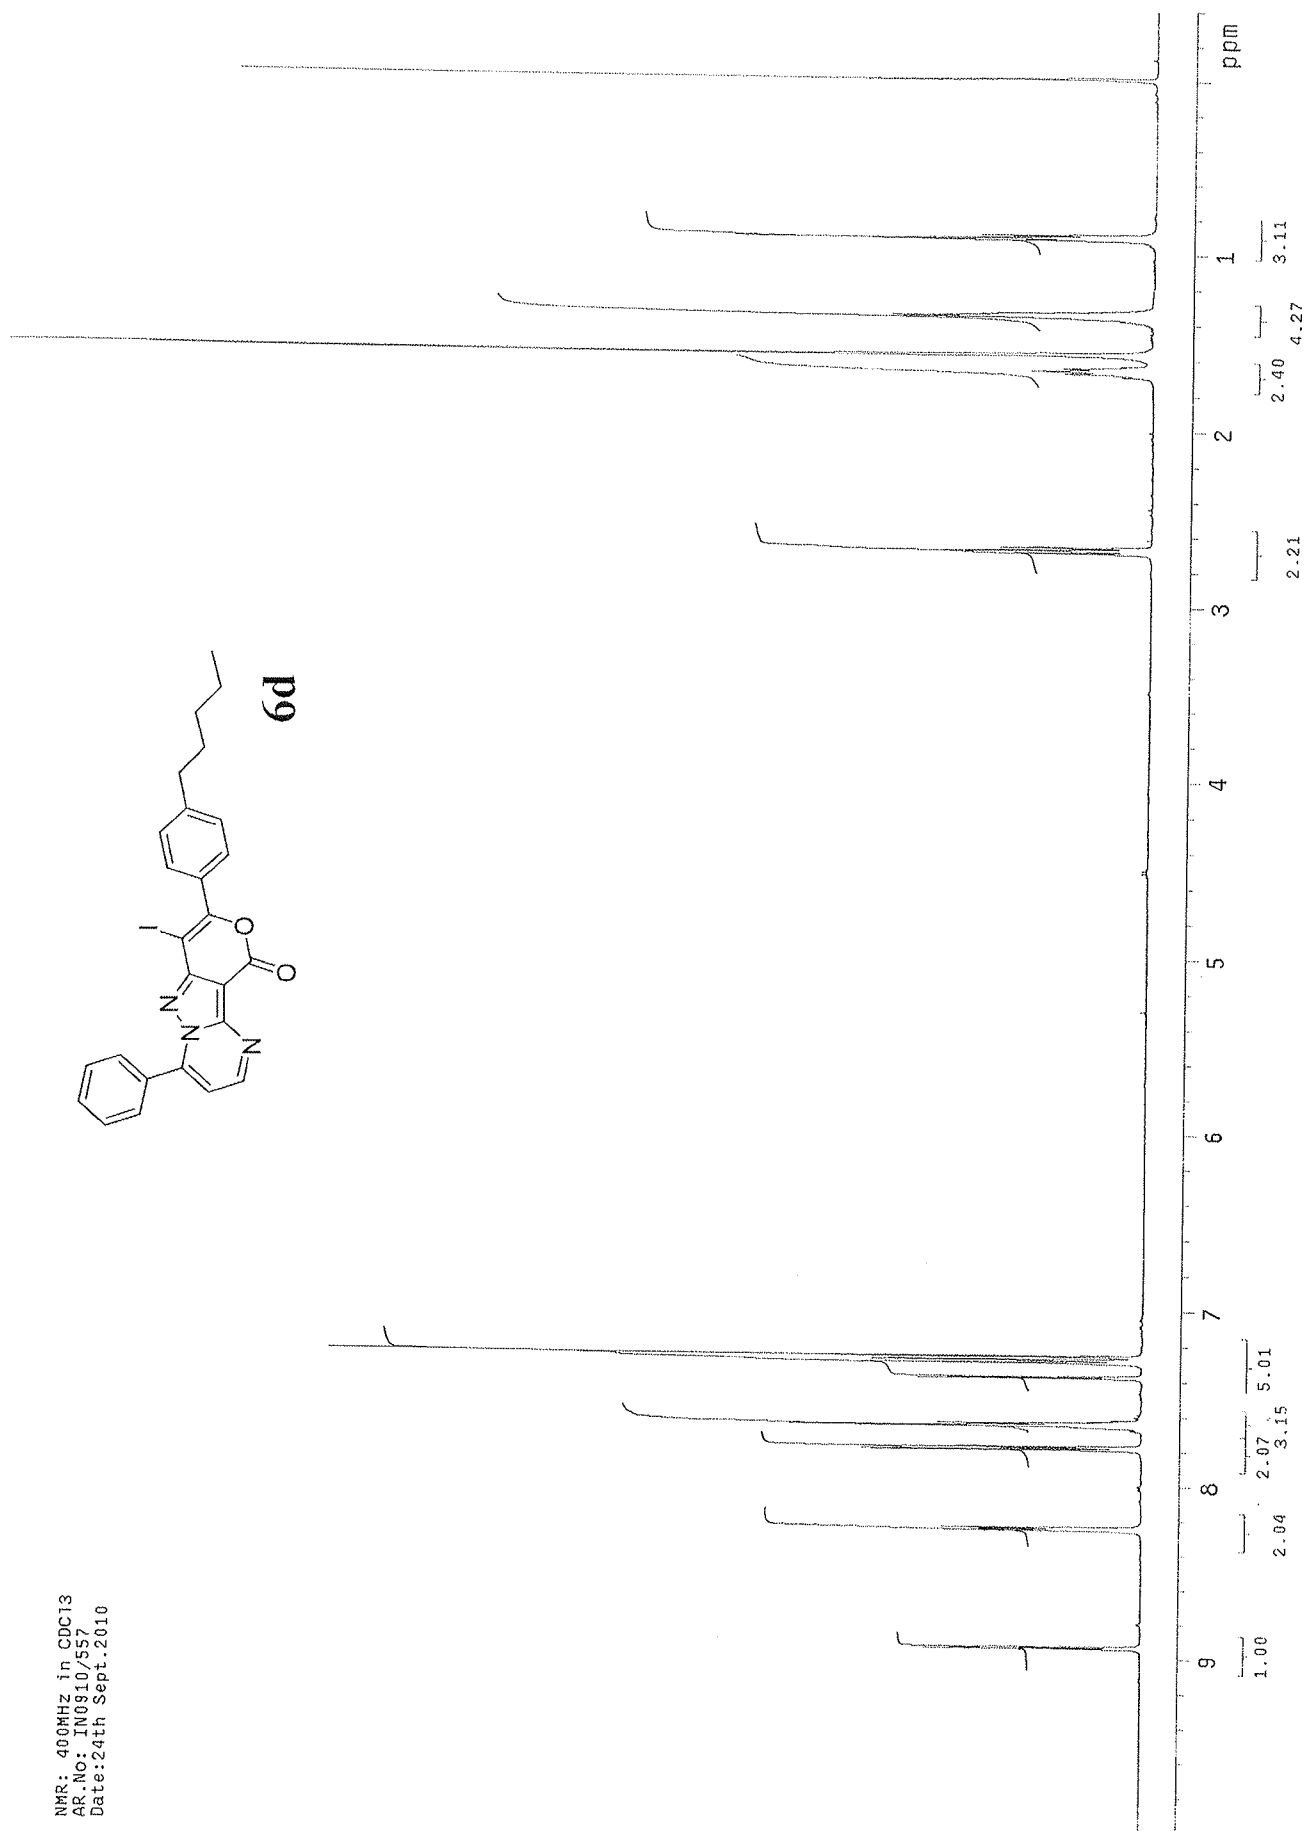

### Copies of NMR spectra

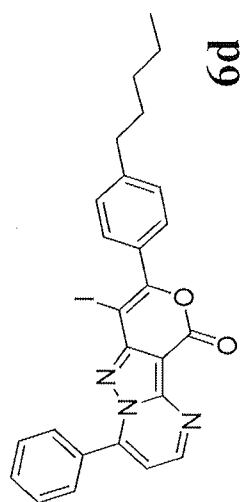

6d

NMR-400 in CDCl<sub>3</sub>  
AR.No:ME0910/1.425  
Date:24th Sept 2010

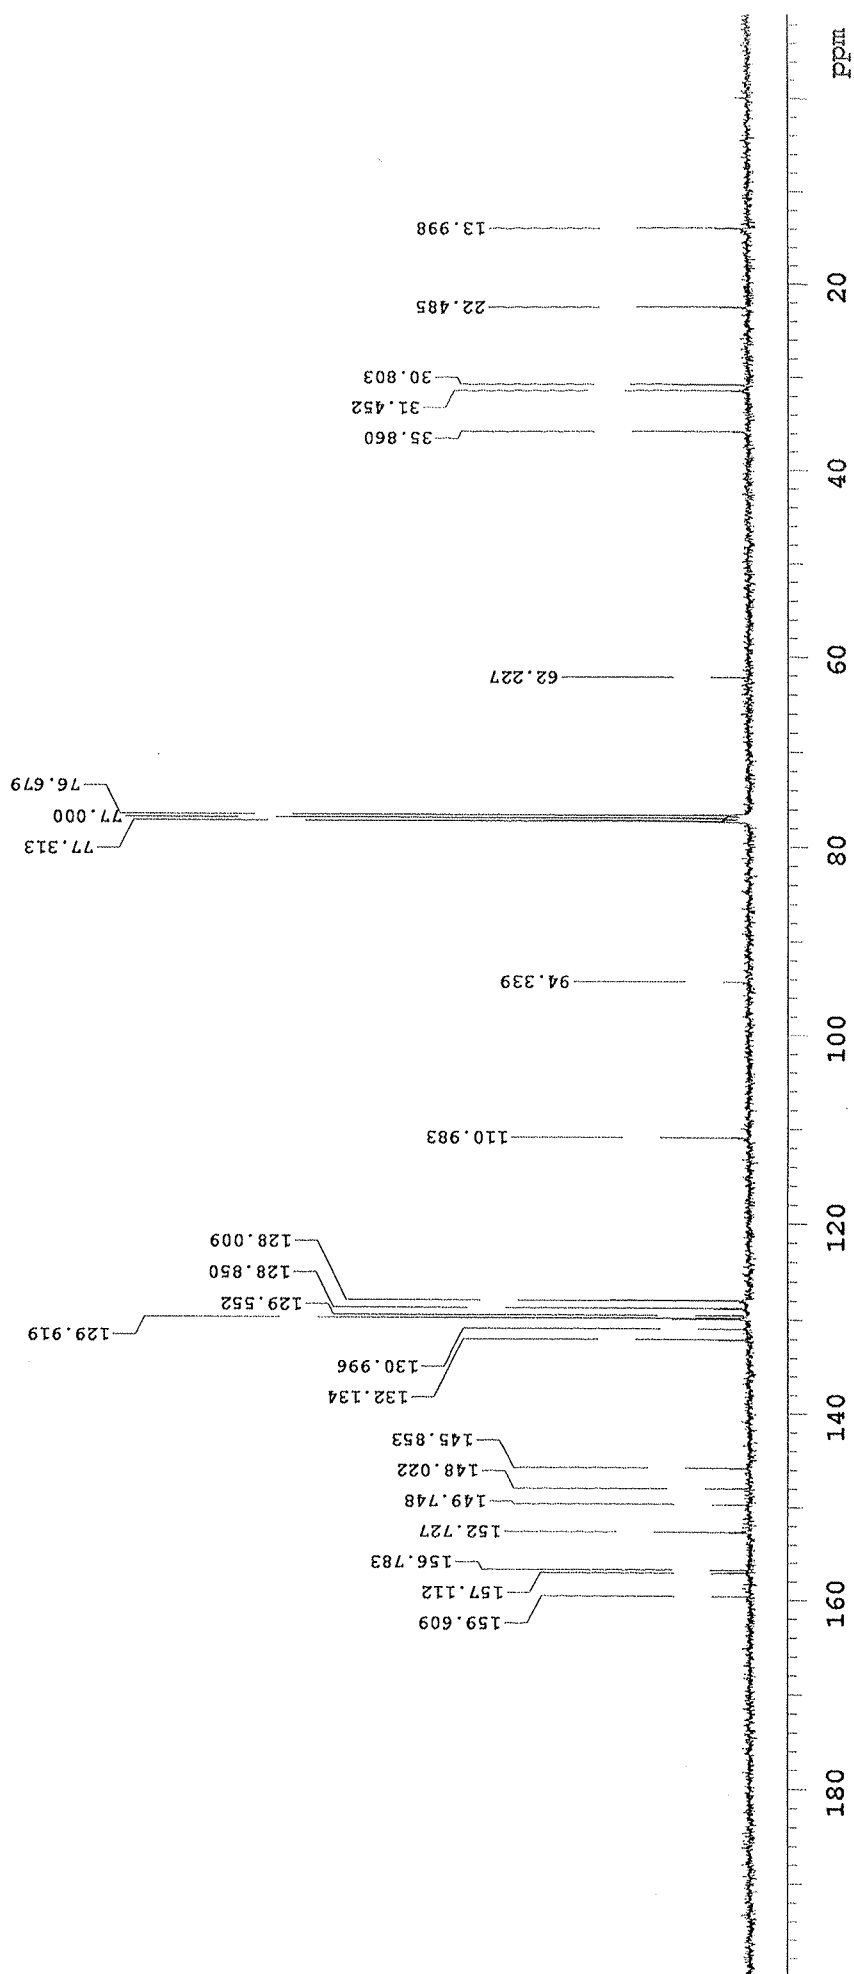

# Copies of NMR spectra

AR&D, Aurigene Discovery Technologies Ltd.  
Instrument : Mercury Plus (Varian 400MHz)  
Date & Time : Fri Sep 3 14:51:11 GMT 2010

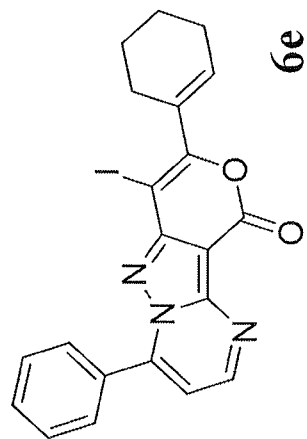

NMR-400 in CDCl<sub>3</sub>  
AR.No:ME0910/117  
Date: 3rd Sept 2010

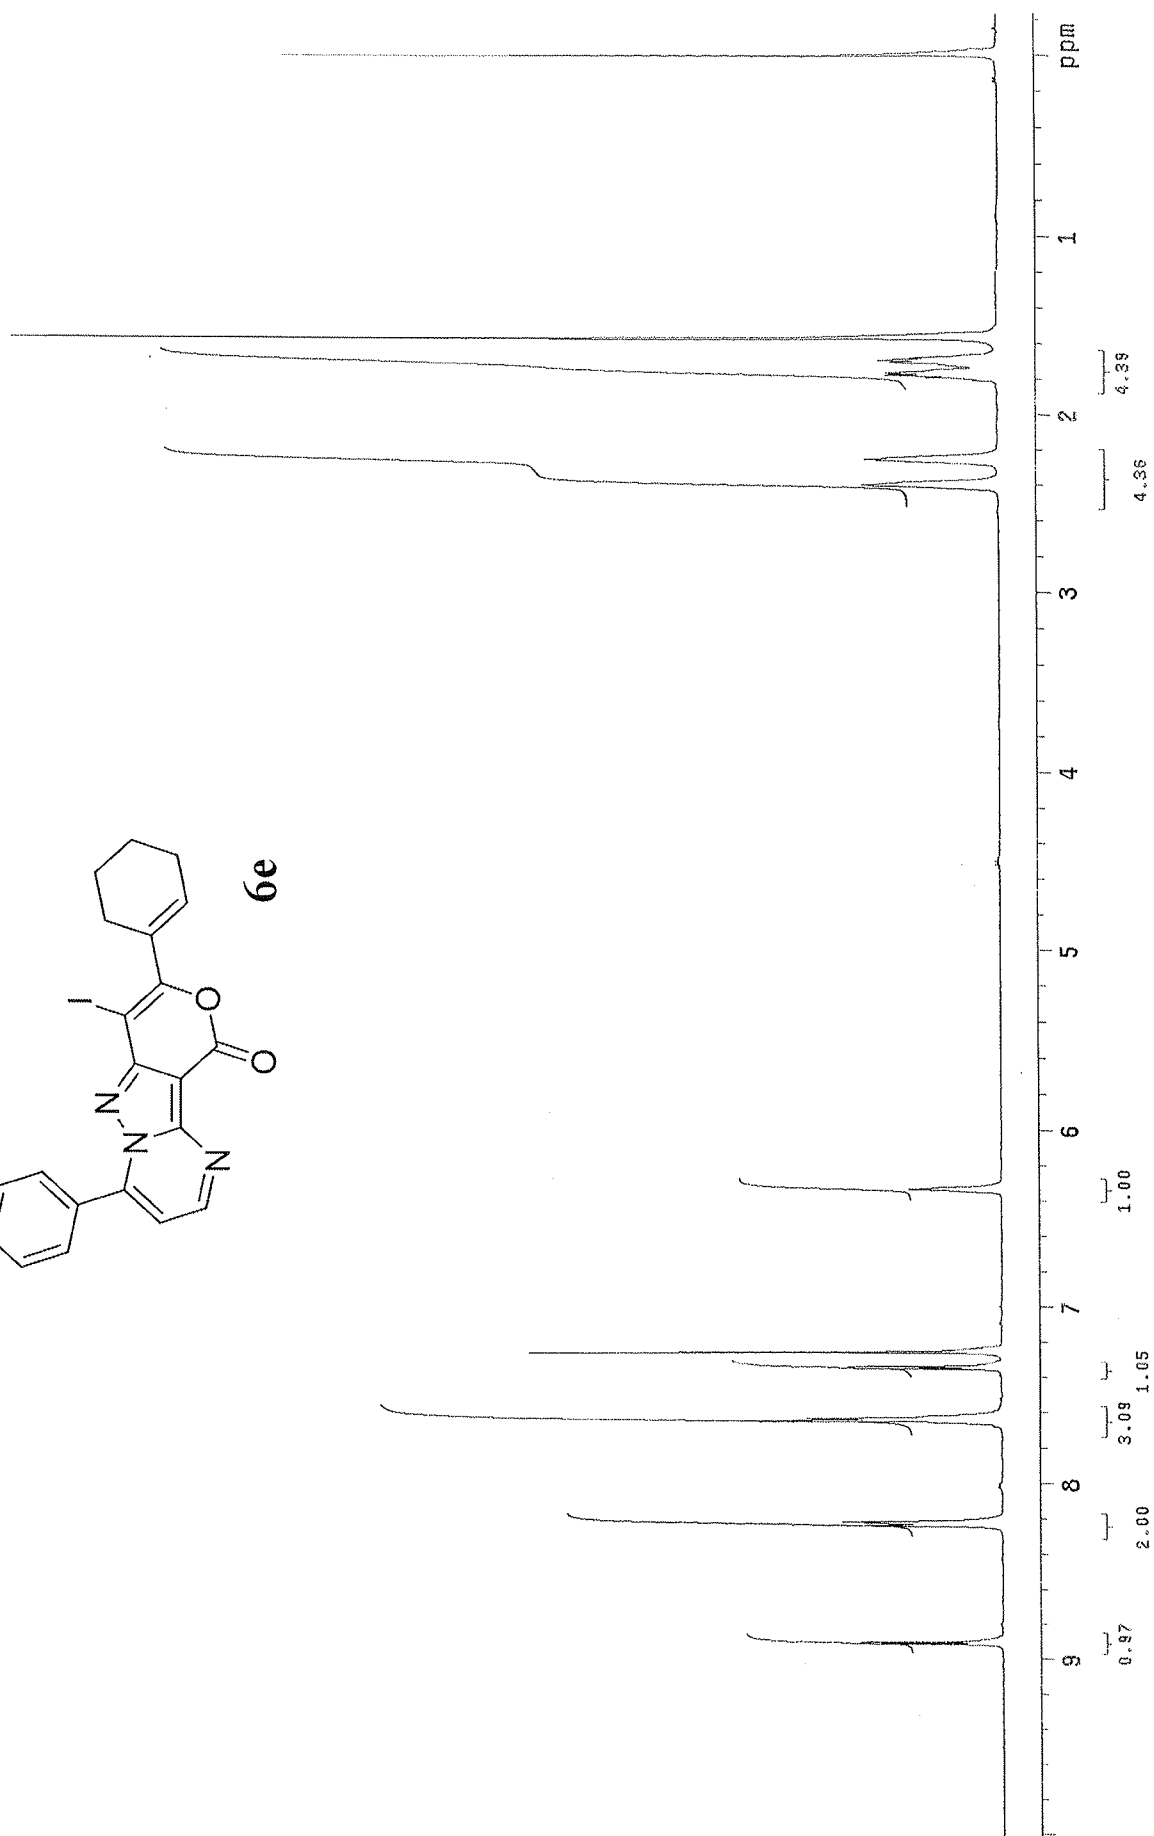

# Copies of NMR spectra

AR&D, Aurigene Discovery Technologies Ltd, Hyderabad

NMR-400 in CDCl<sub>3</sub>  
AR NO:GE0910/36  
Date: 25 th Sept. 2010

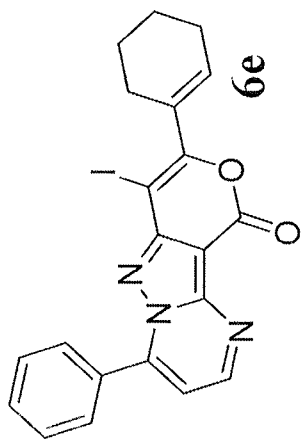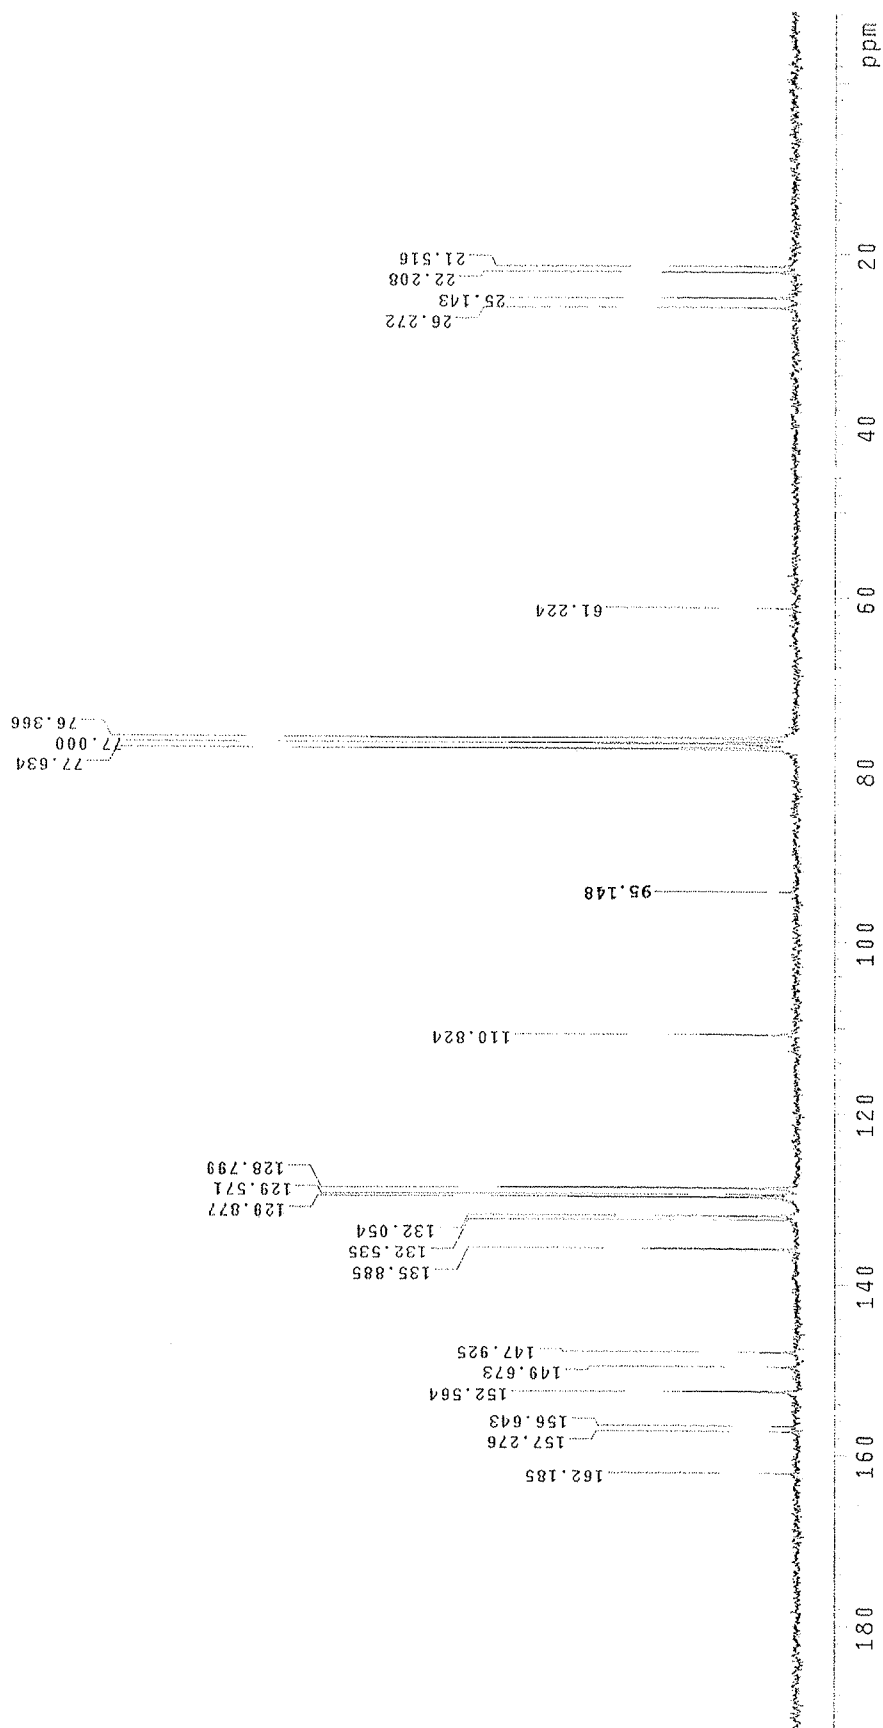



### Copies of NMR spectra

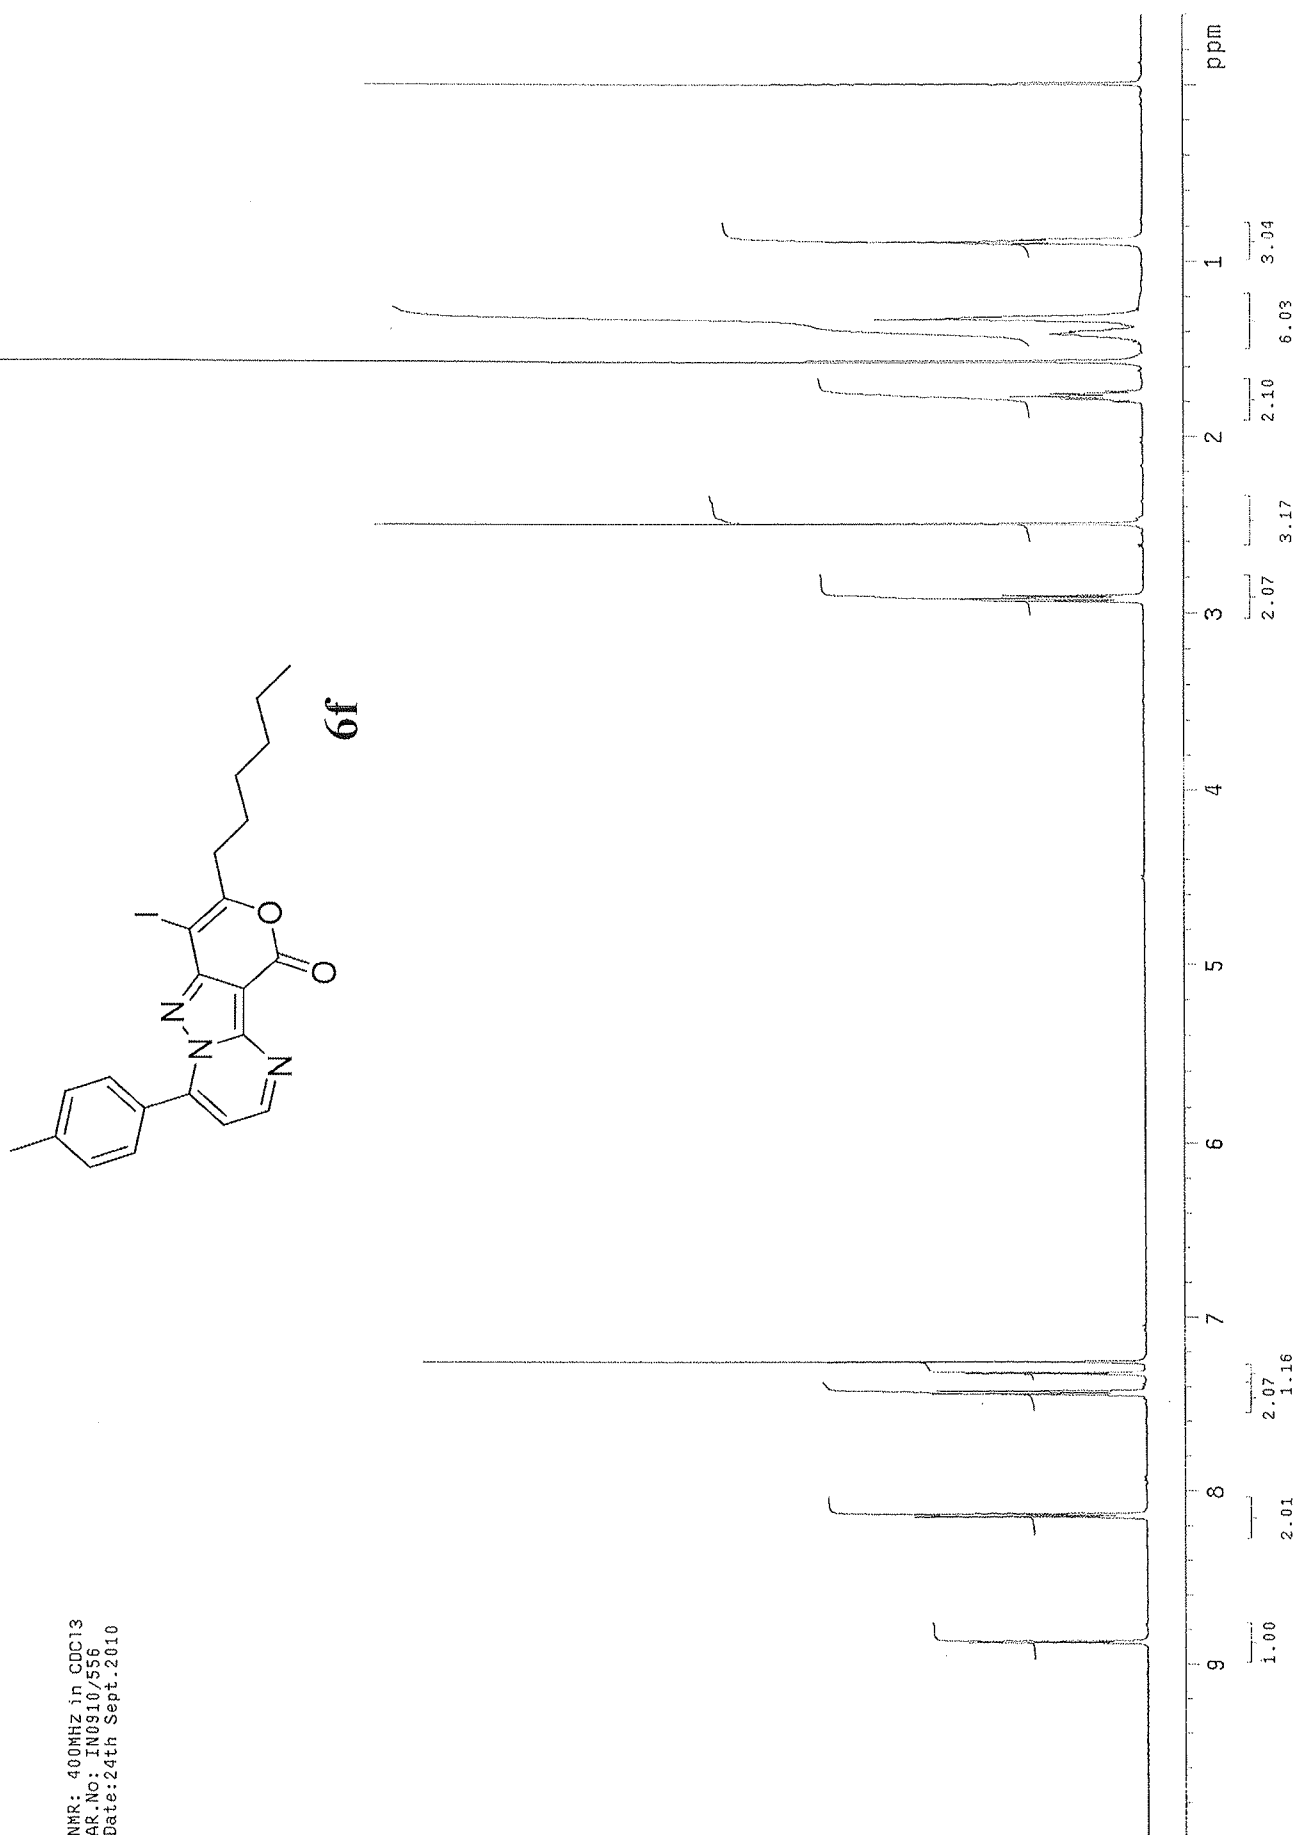

# Copies of NMR spectra

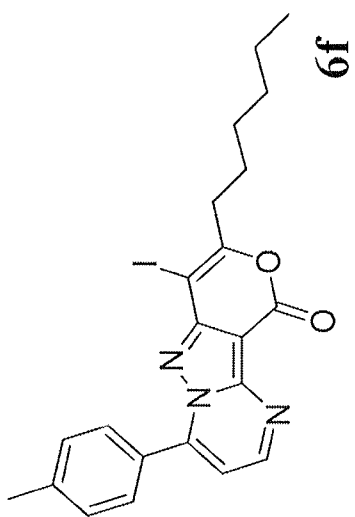

NMR-400 in CDCl<sub>3</sub>  
AR.No:ME0910/1424  
Date:24<sup>th</sup> Sept 2010

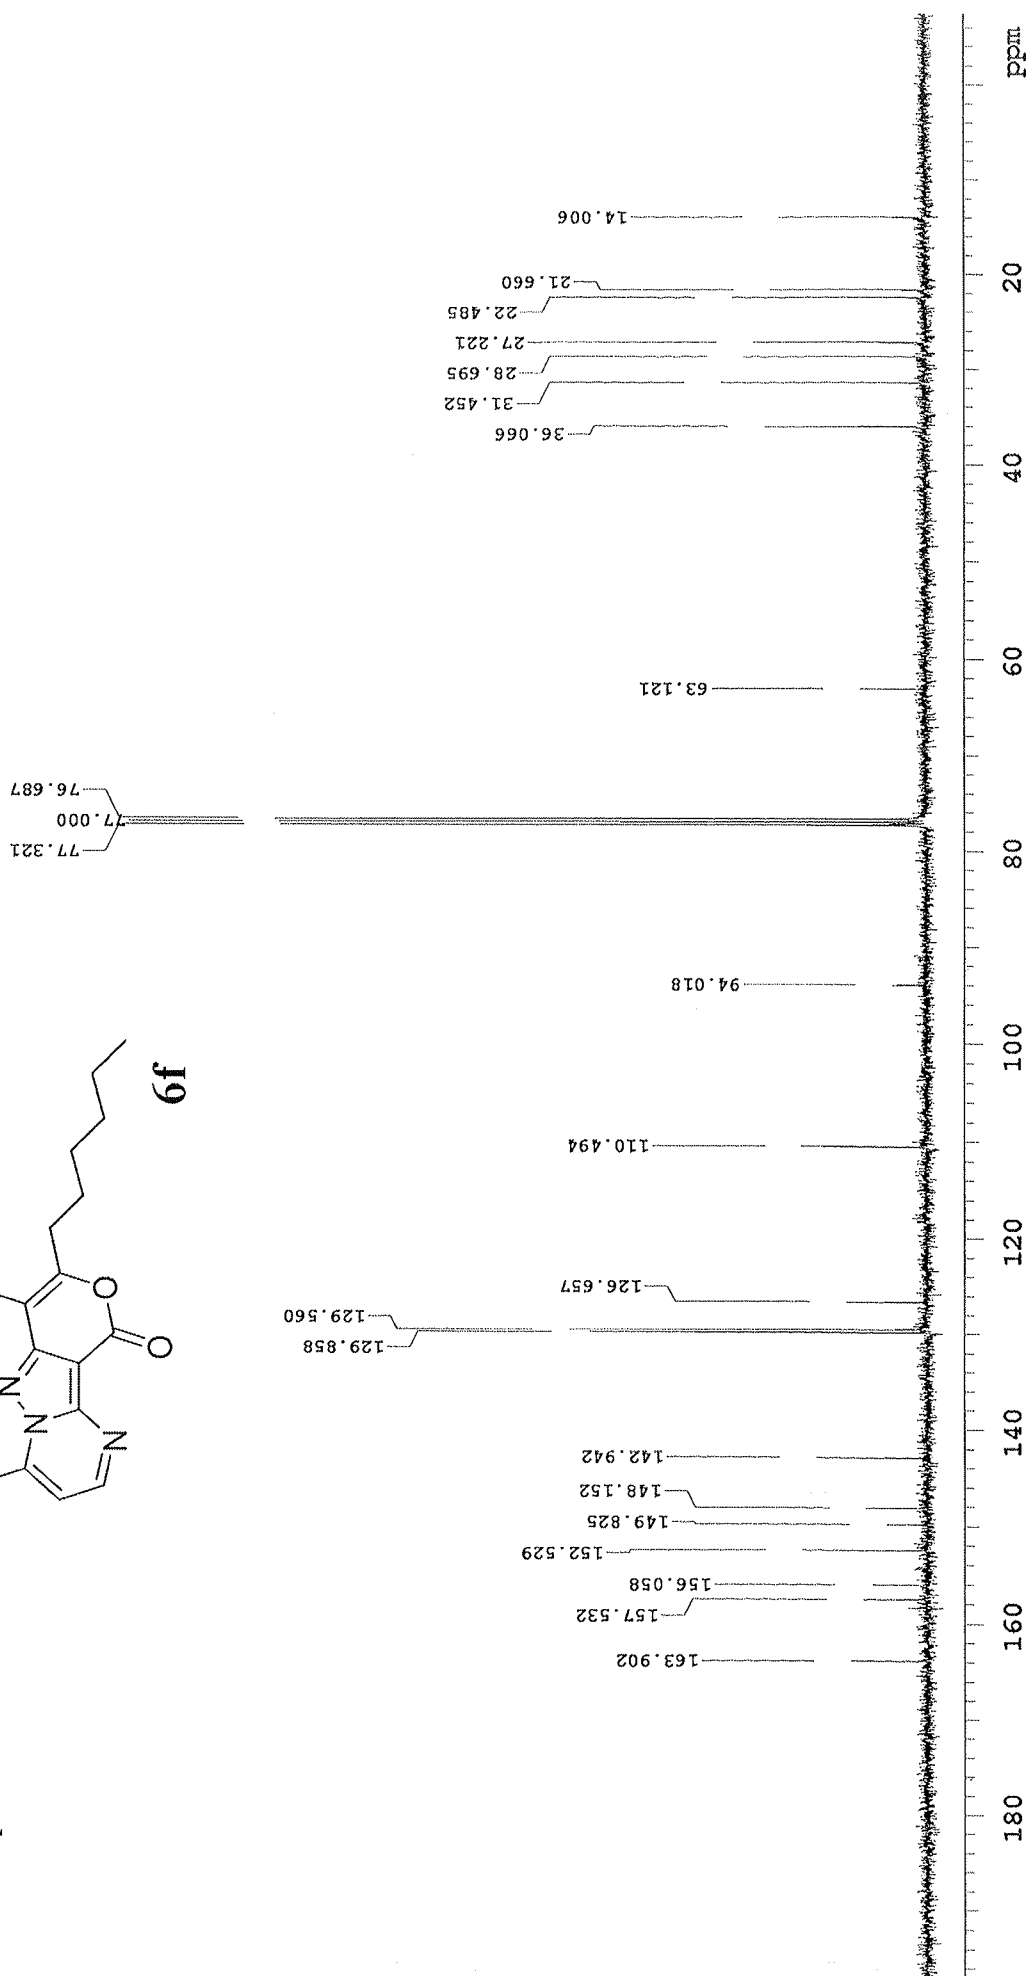

# Copies of NMR spectra

NMR-400 in CDCL3  
AR.No:ME1010/285  
Date: 5th Oct 2010

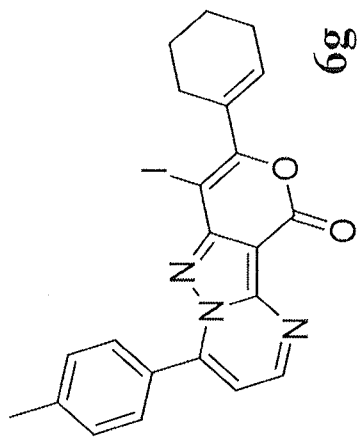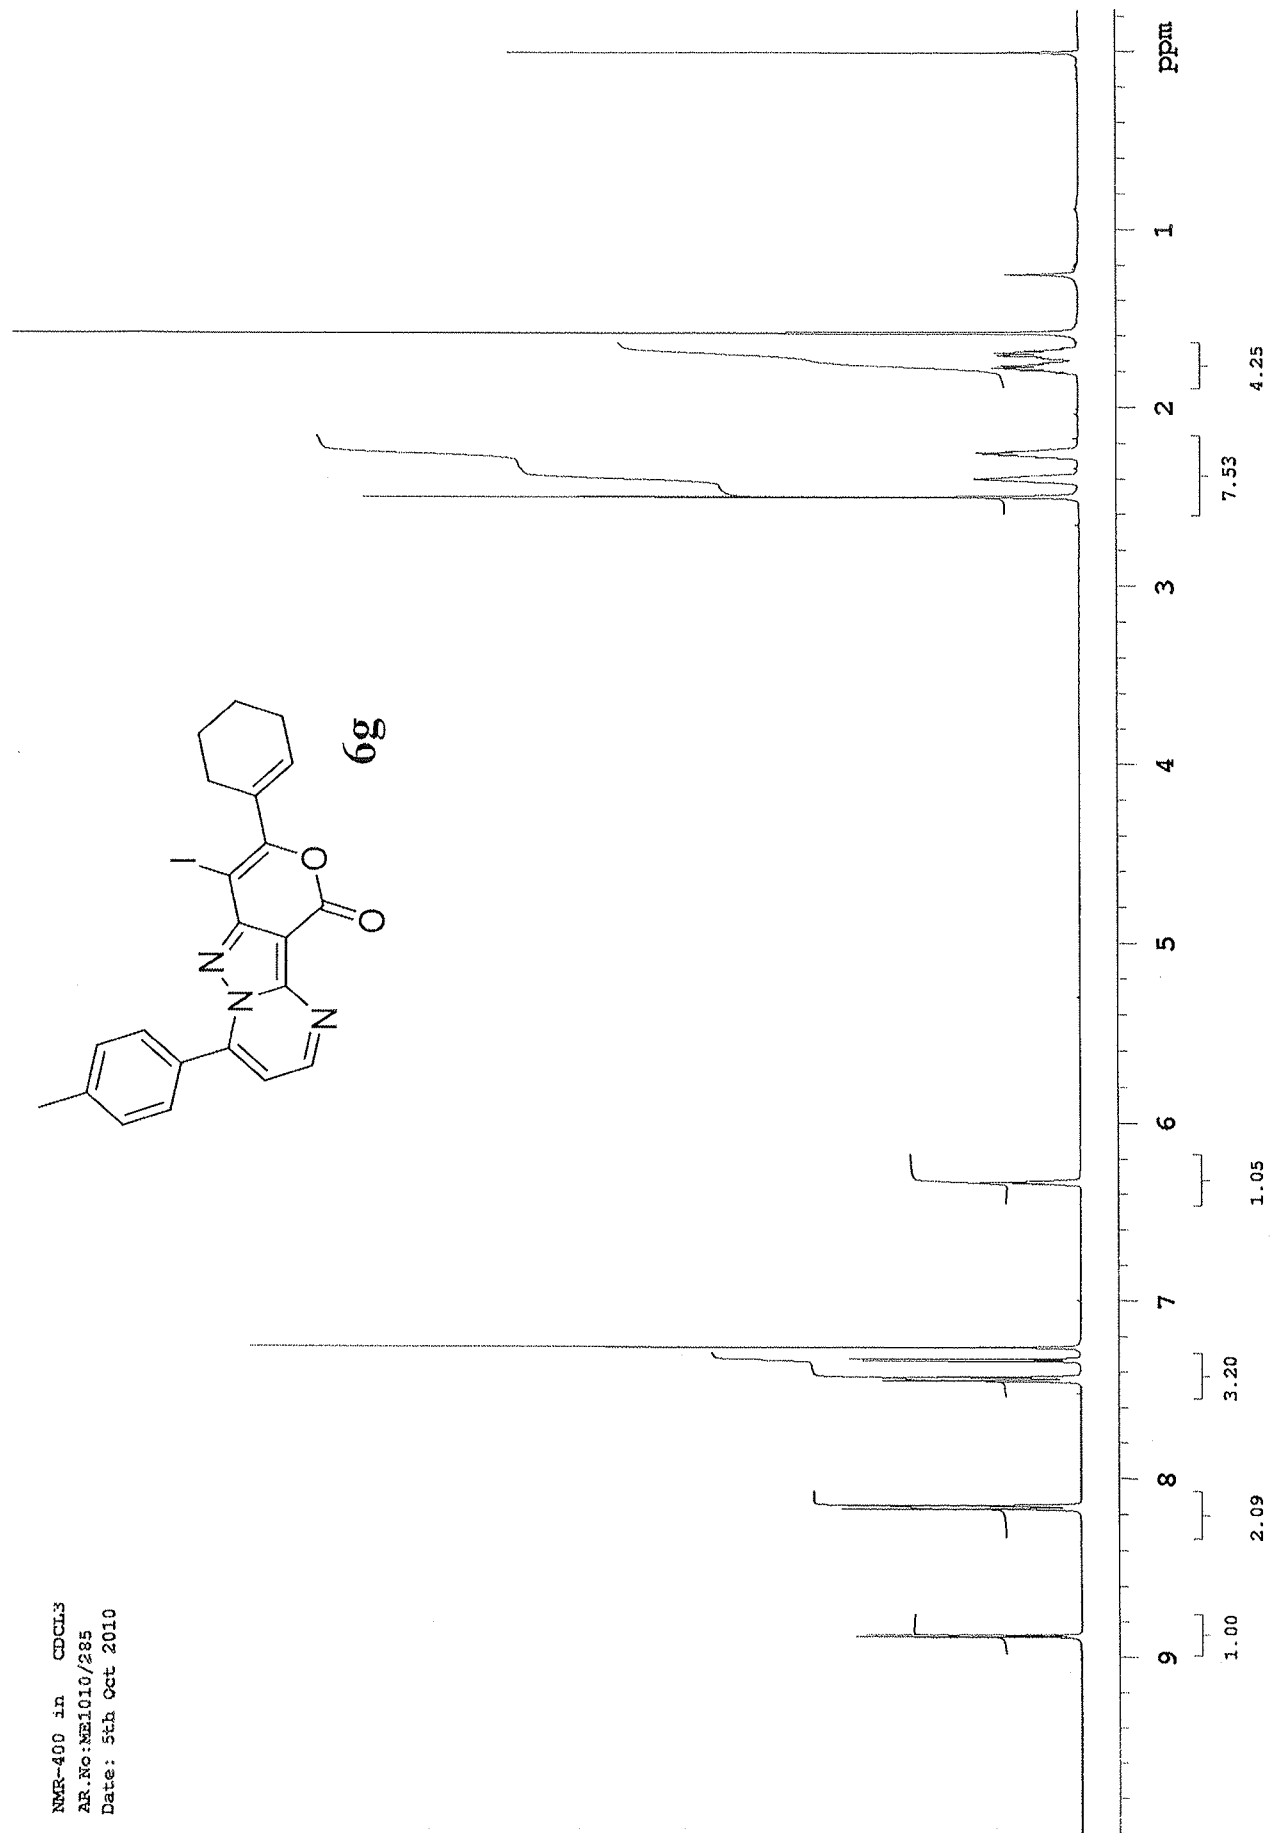

### Copies of NMR spectra

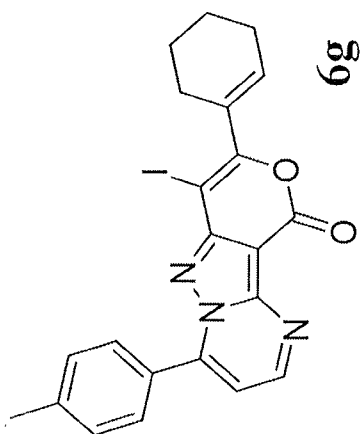

NMR-400 in CDCl3  
AR.No:MEI1010/381  
Date: 05 th Oct 2010

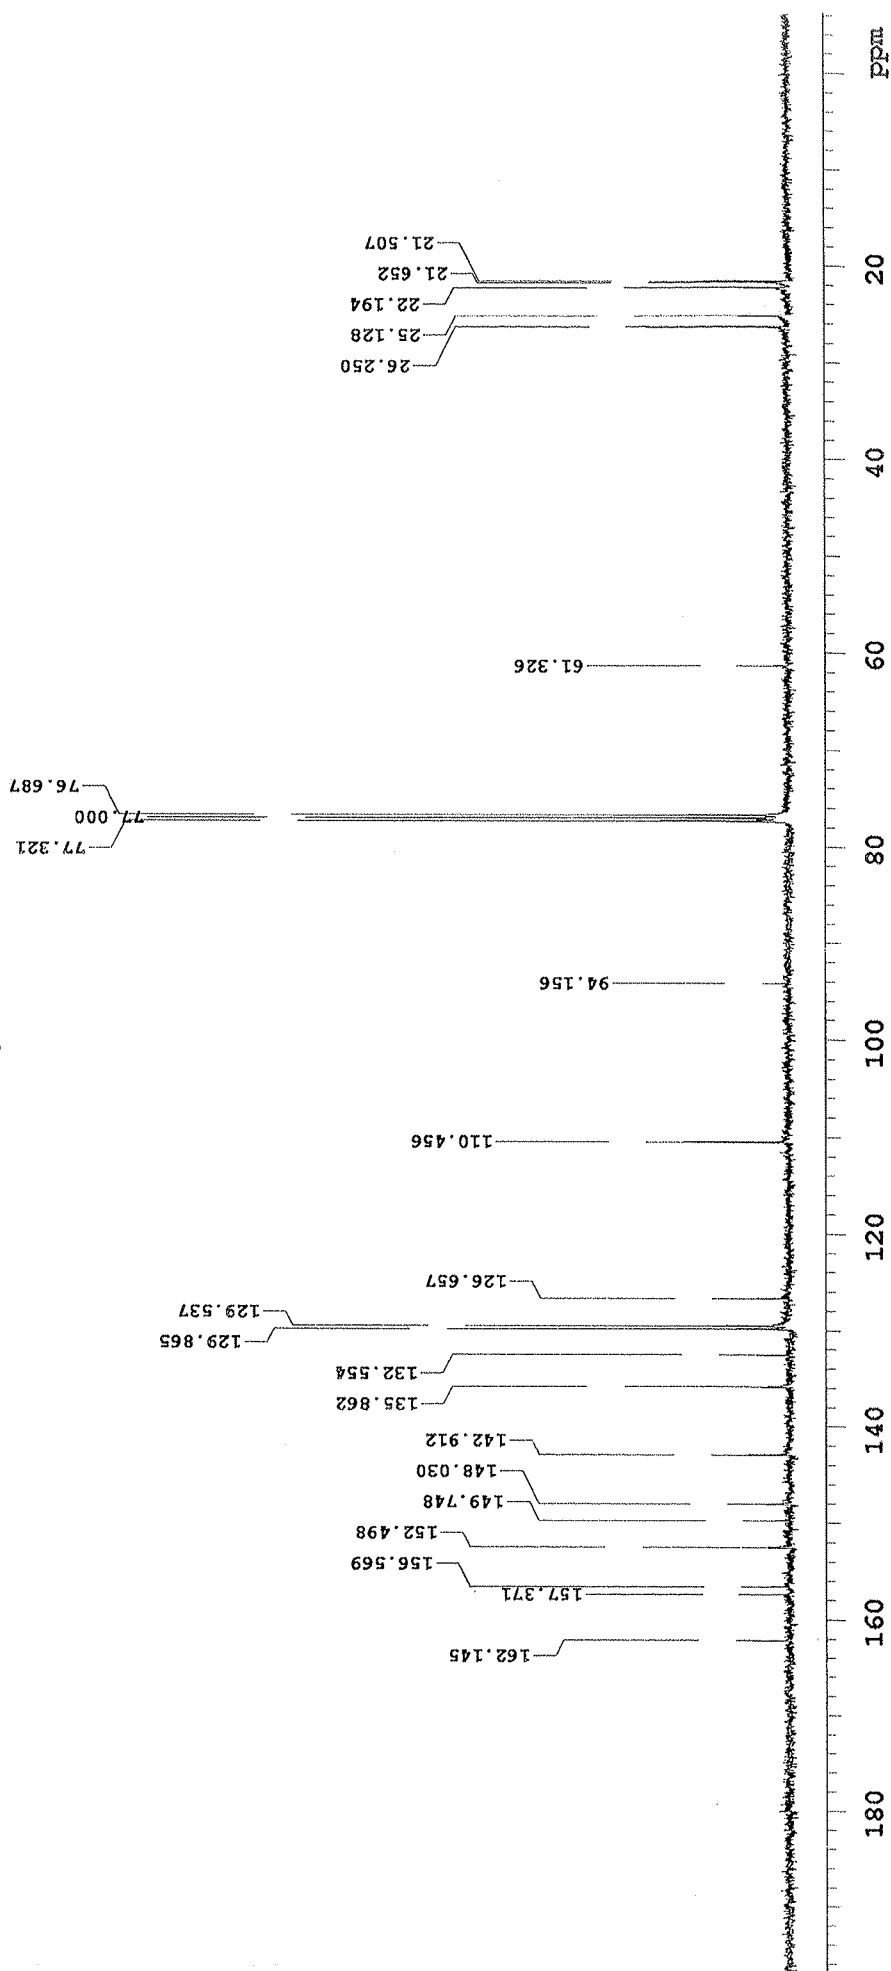

# Copies of NMR spectra

NMR-400 in CDCl<sub>3</sub>  
AR.No:ME0910/930  
Date:20th Sept 2010

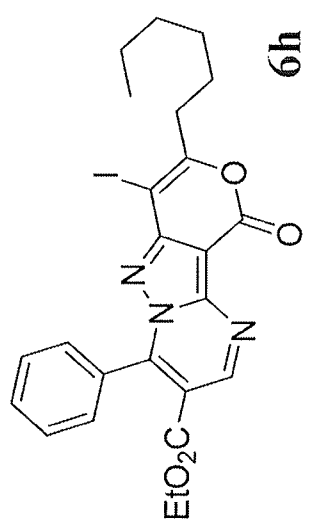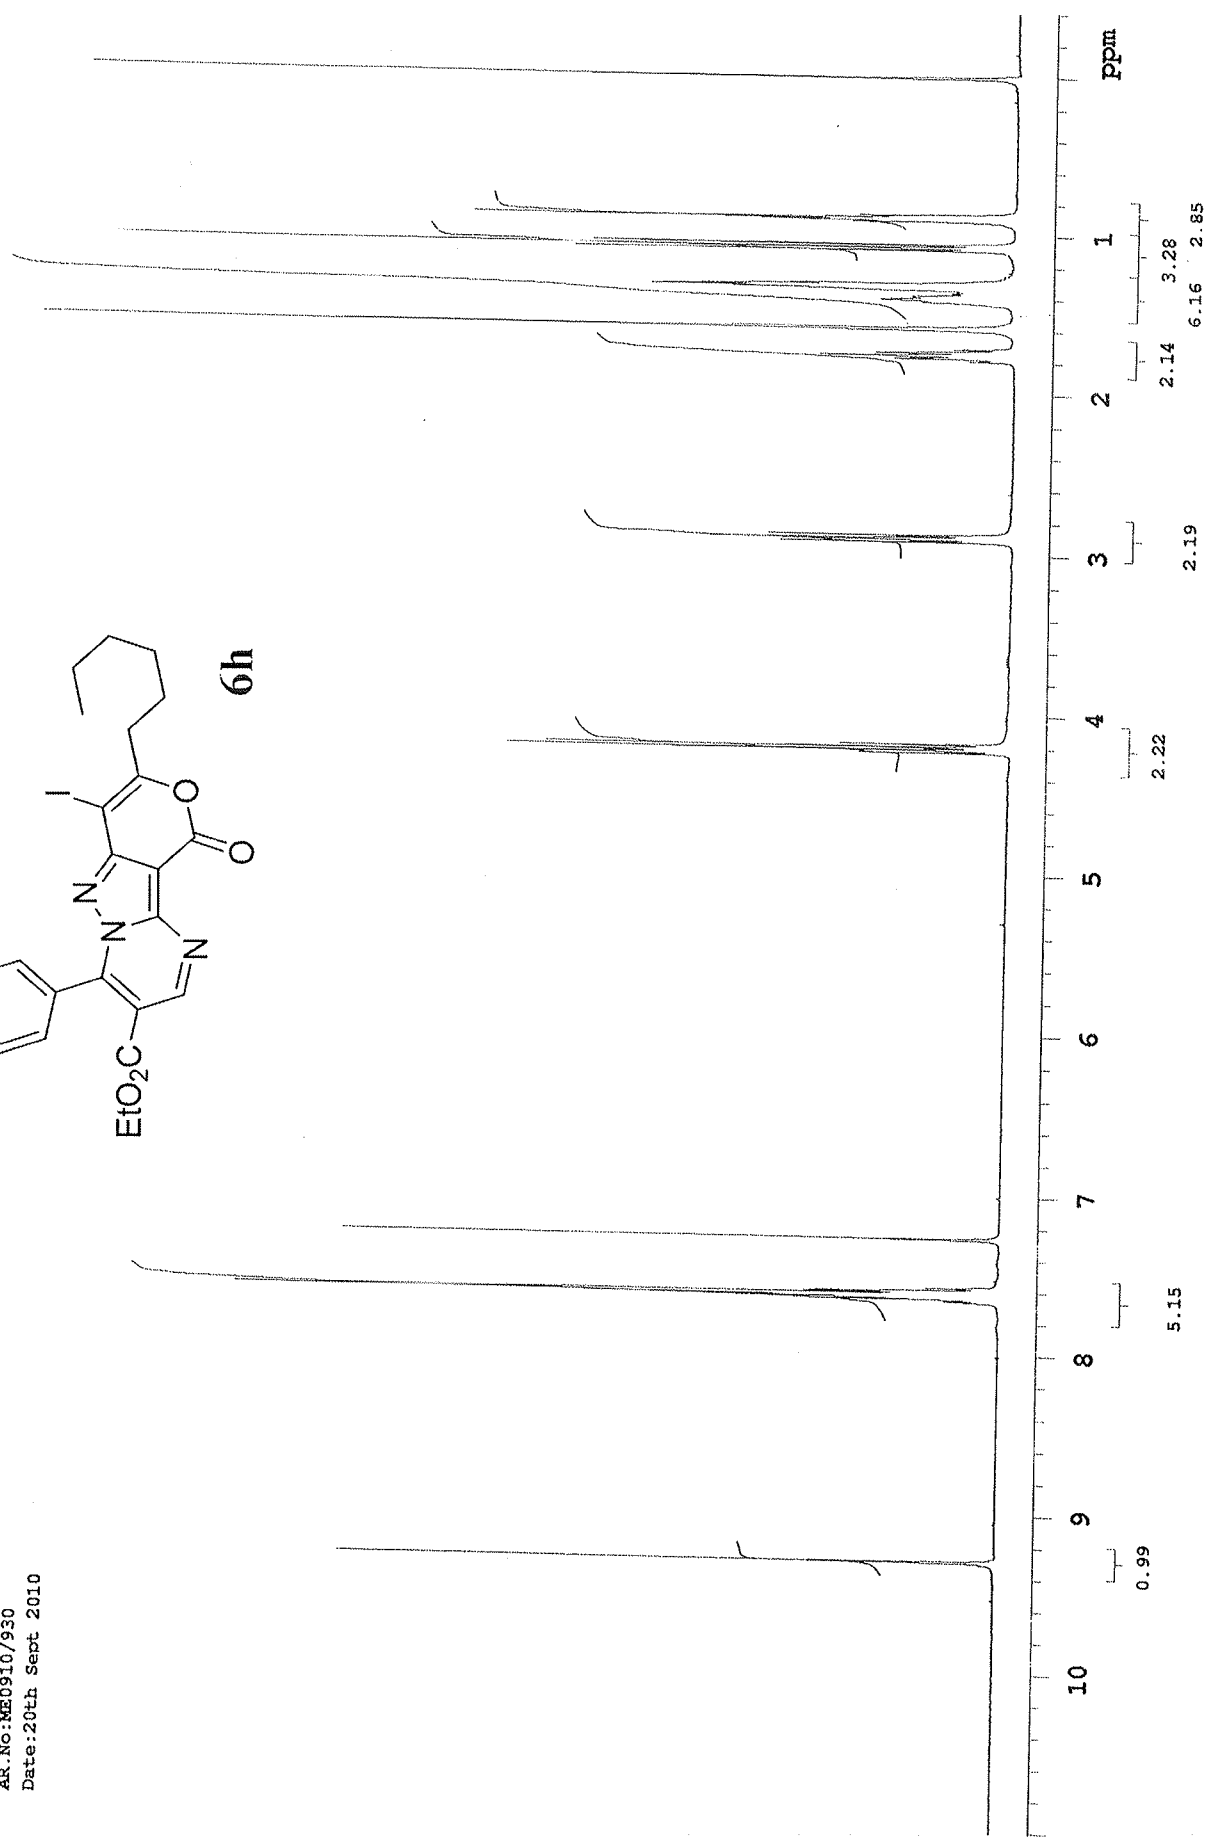

### Copies of NMR spectra

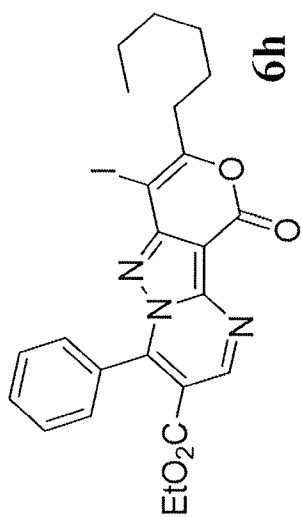

NMR-400MHz in CDCl<sub>3</sub>  
RF.No:ME0910/1455  
Date:24th Sept 2010

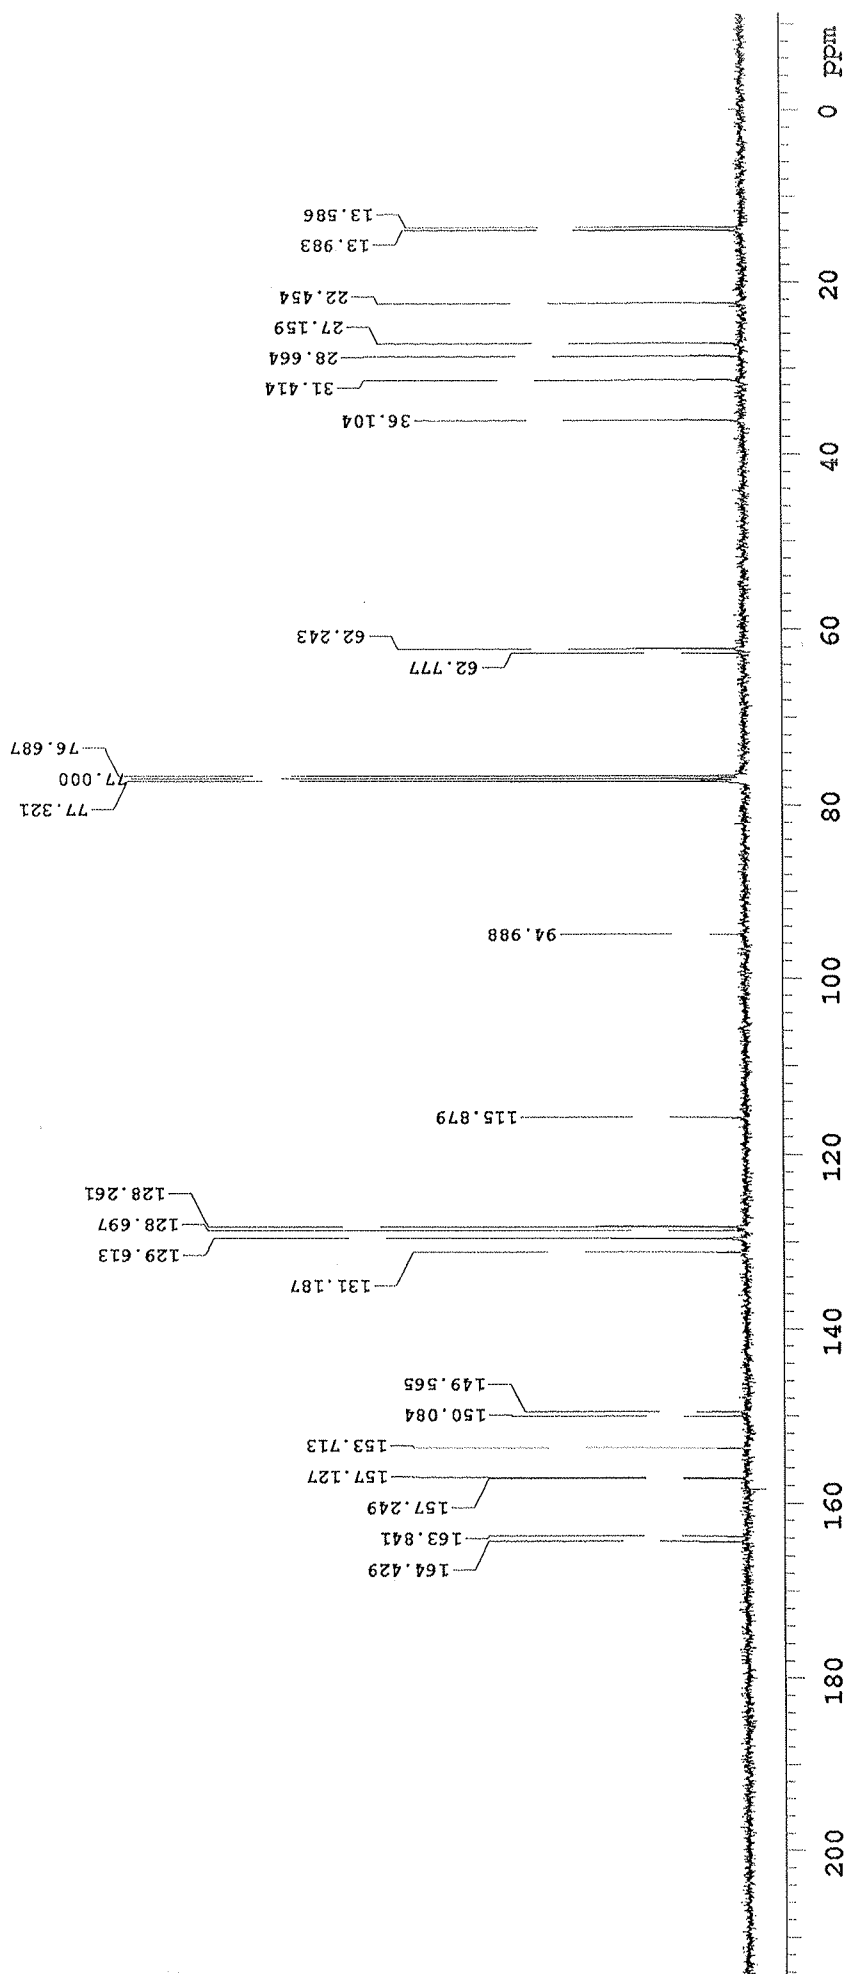

### Copies of NMR spectra

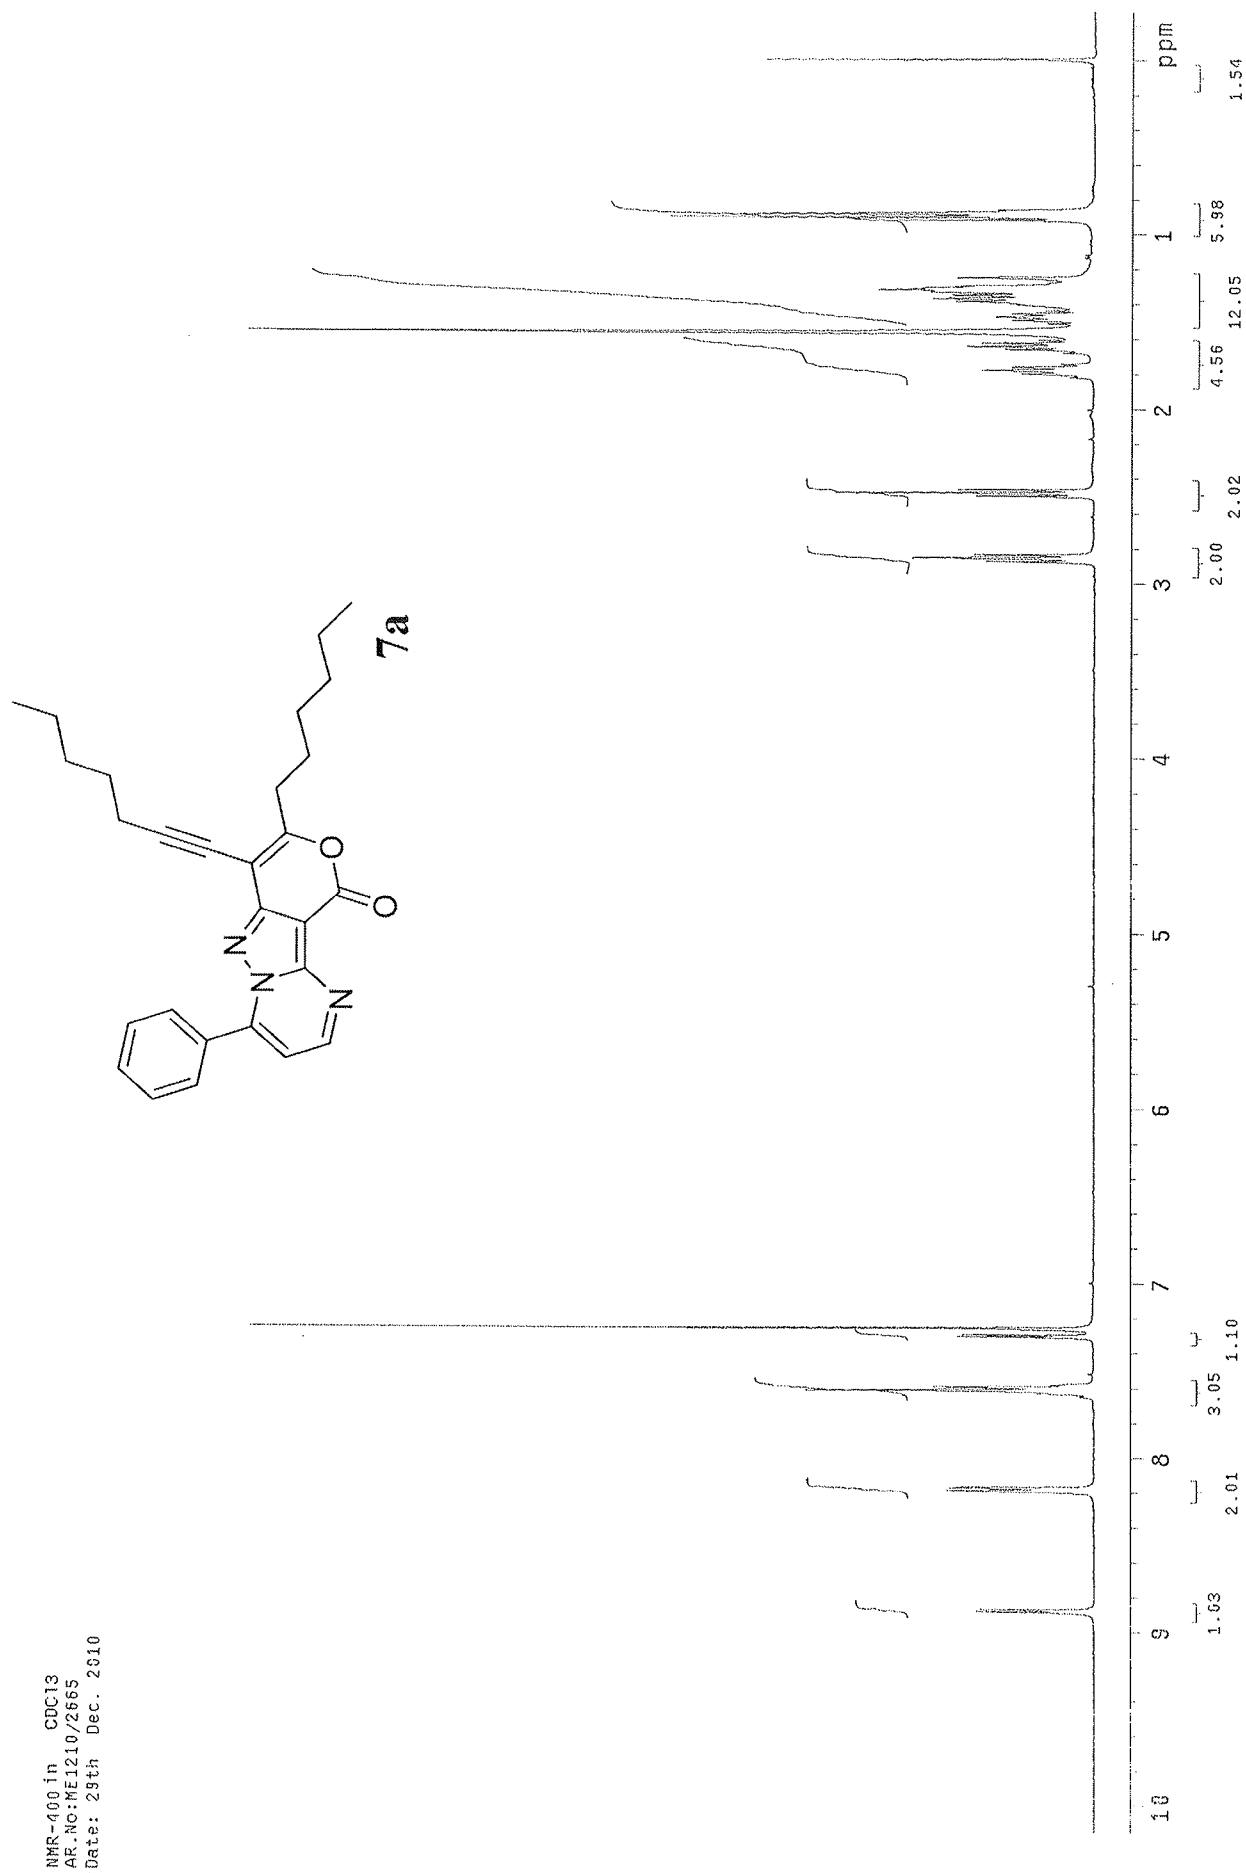

### Copies of NMR spectra

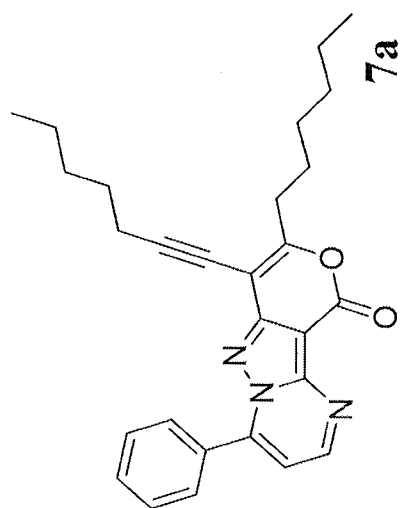

7a

NMR-400 in CDCl<sub>3</sub>  
AR.No:ME1010/1454  
Date: 18 th Oct 2010

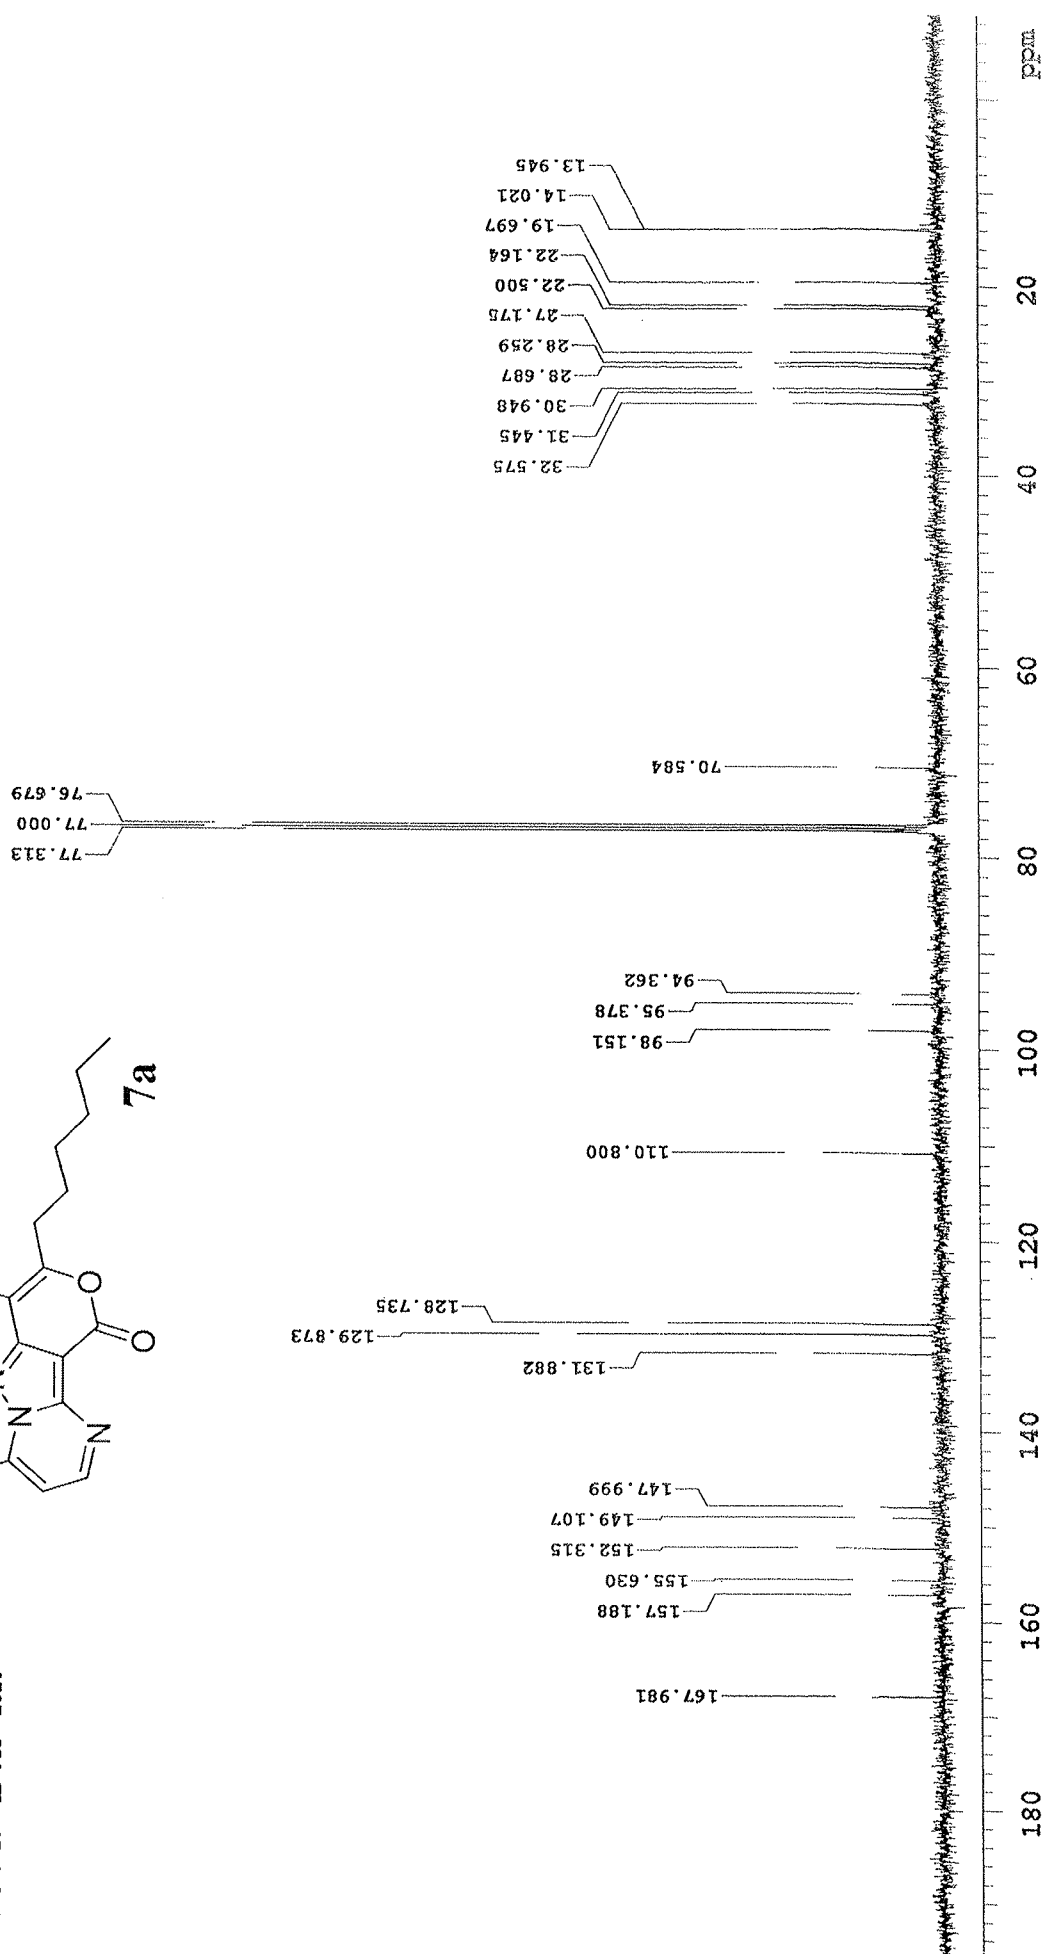



# Copies of NMR spectra

AR&D, Aurigene Discovery Technologies Ltd, Hyderabad  
Instrument : Mercury Plus (Varian 400MHz)  
Date & Time : Wed May 5 12:15:07 IST 2010  
Recorded By : Shruithi. D

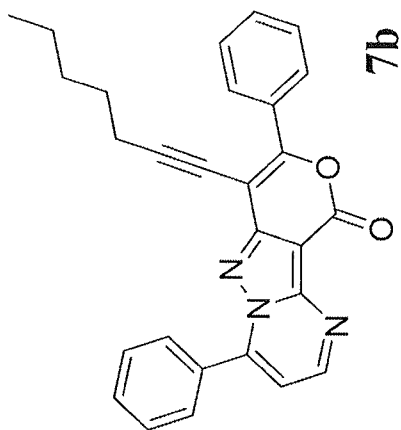

NMR-400 in CDCl<sub>3</sub>  
AR.No:ME0510/237  
Date:5th May 2010

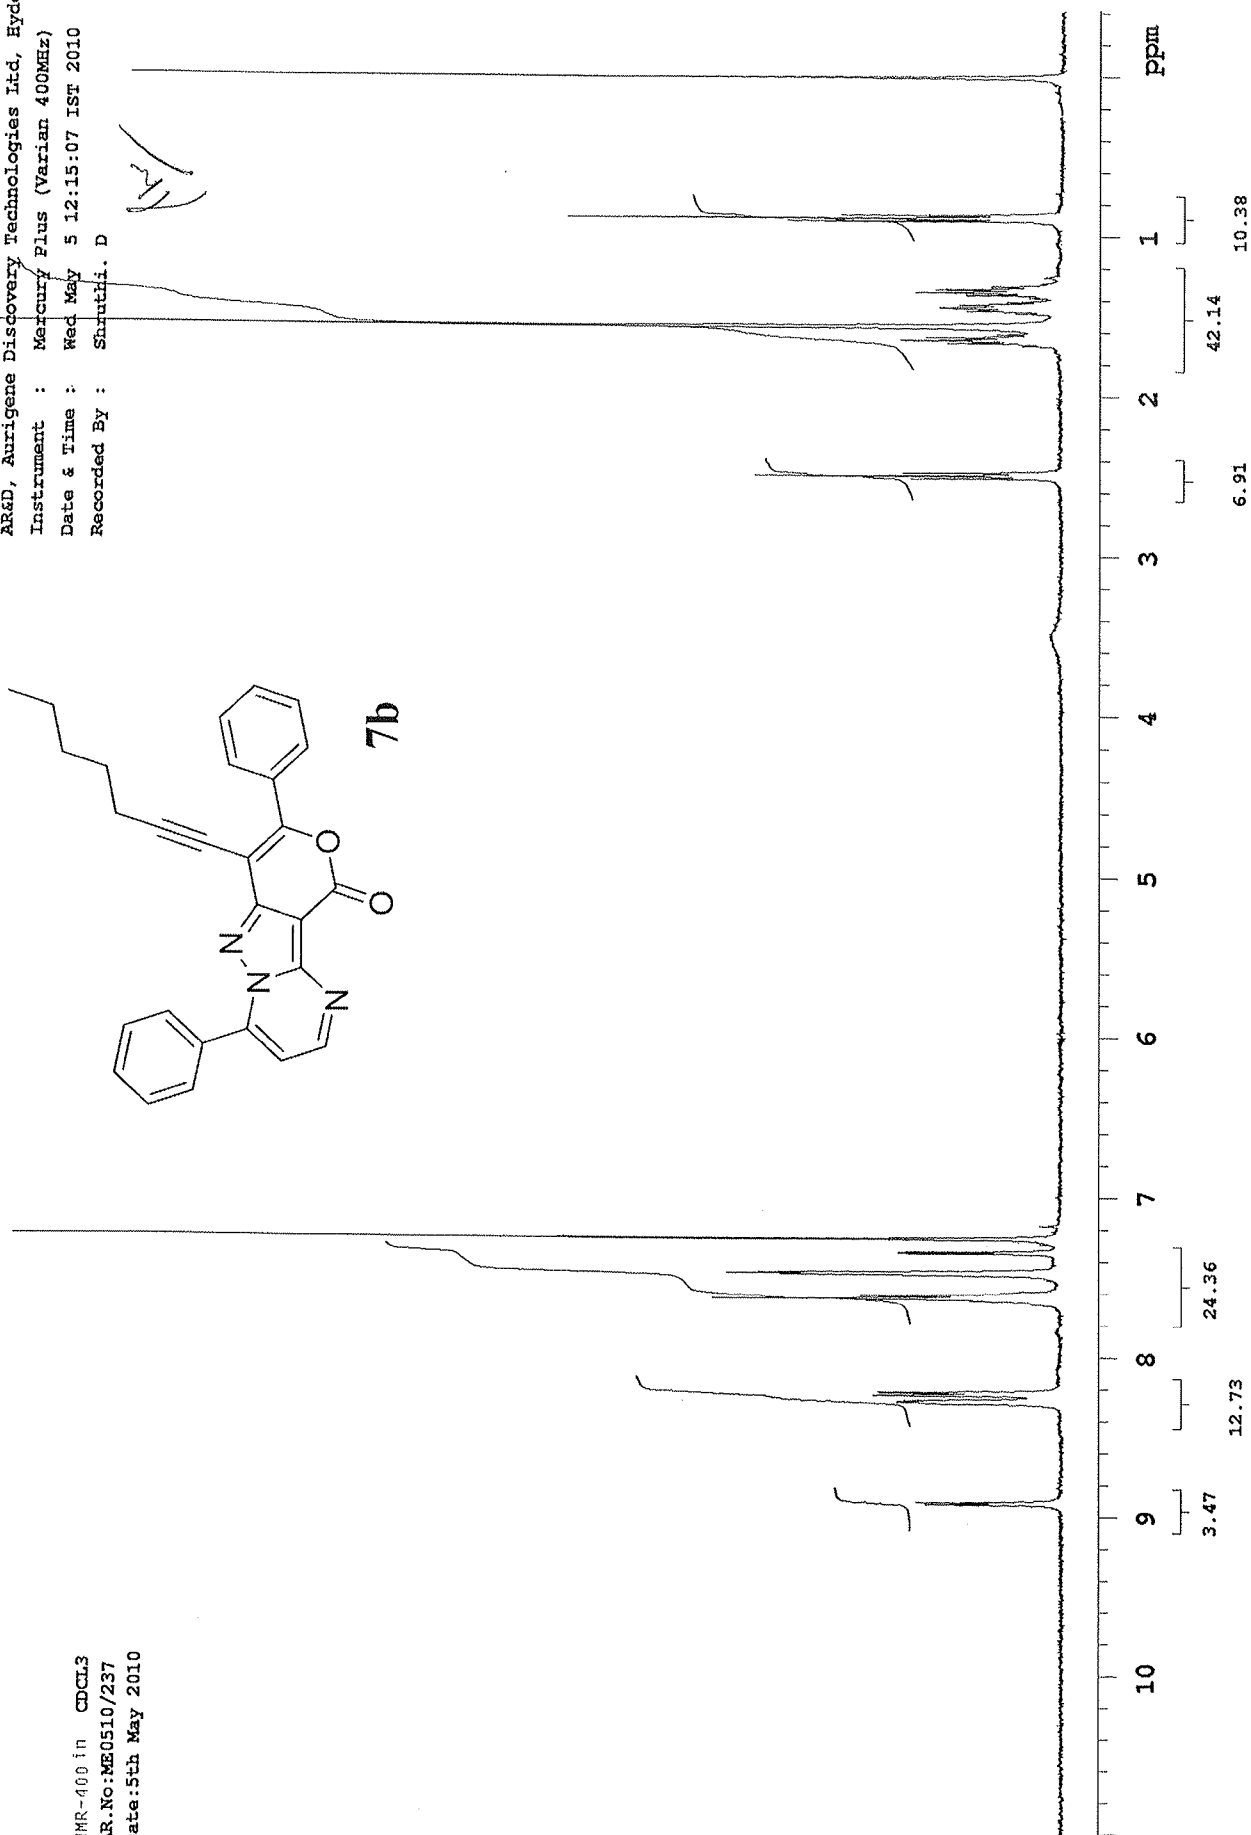

### Copies of NMR spectra

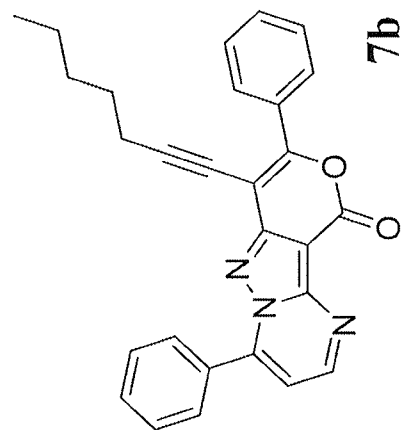

NMR-400 in CDCl3  
AK.No:ME1210/380  
Date: 3rd Dec. 2010

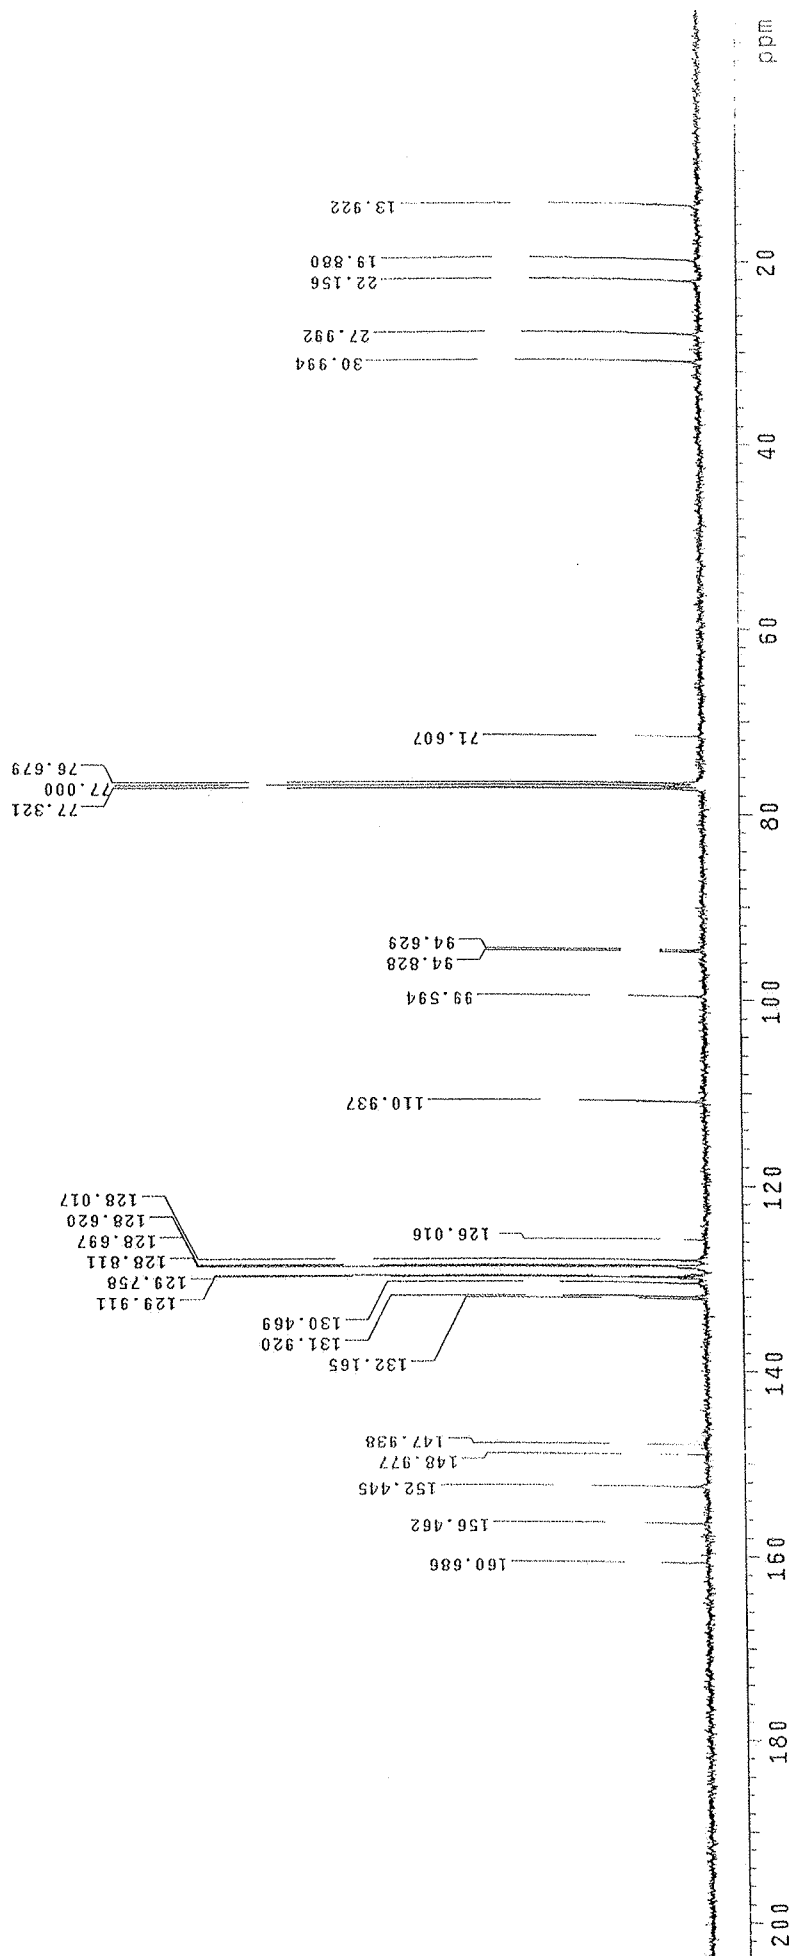

# Copies of NMR spectra

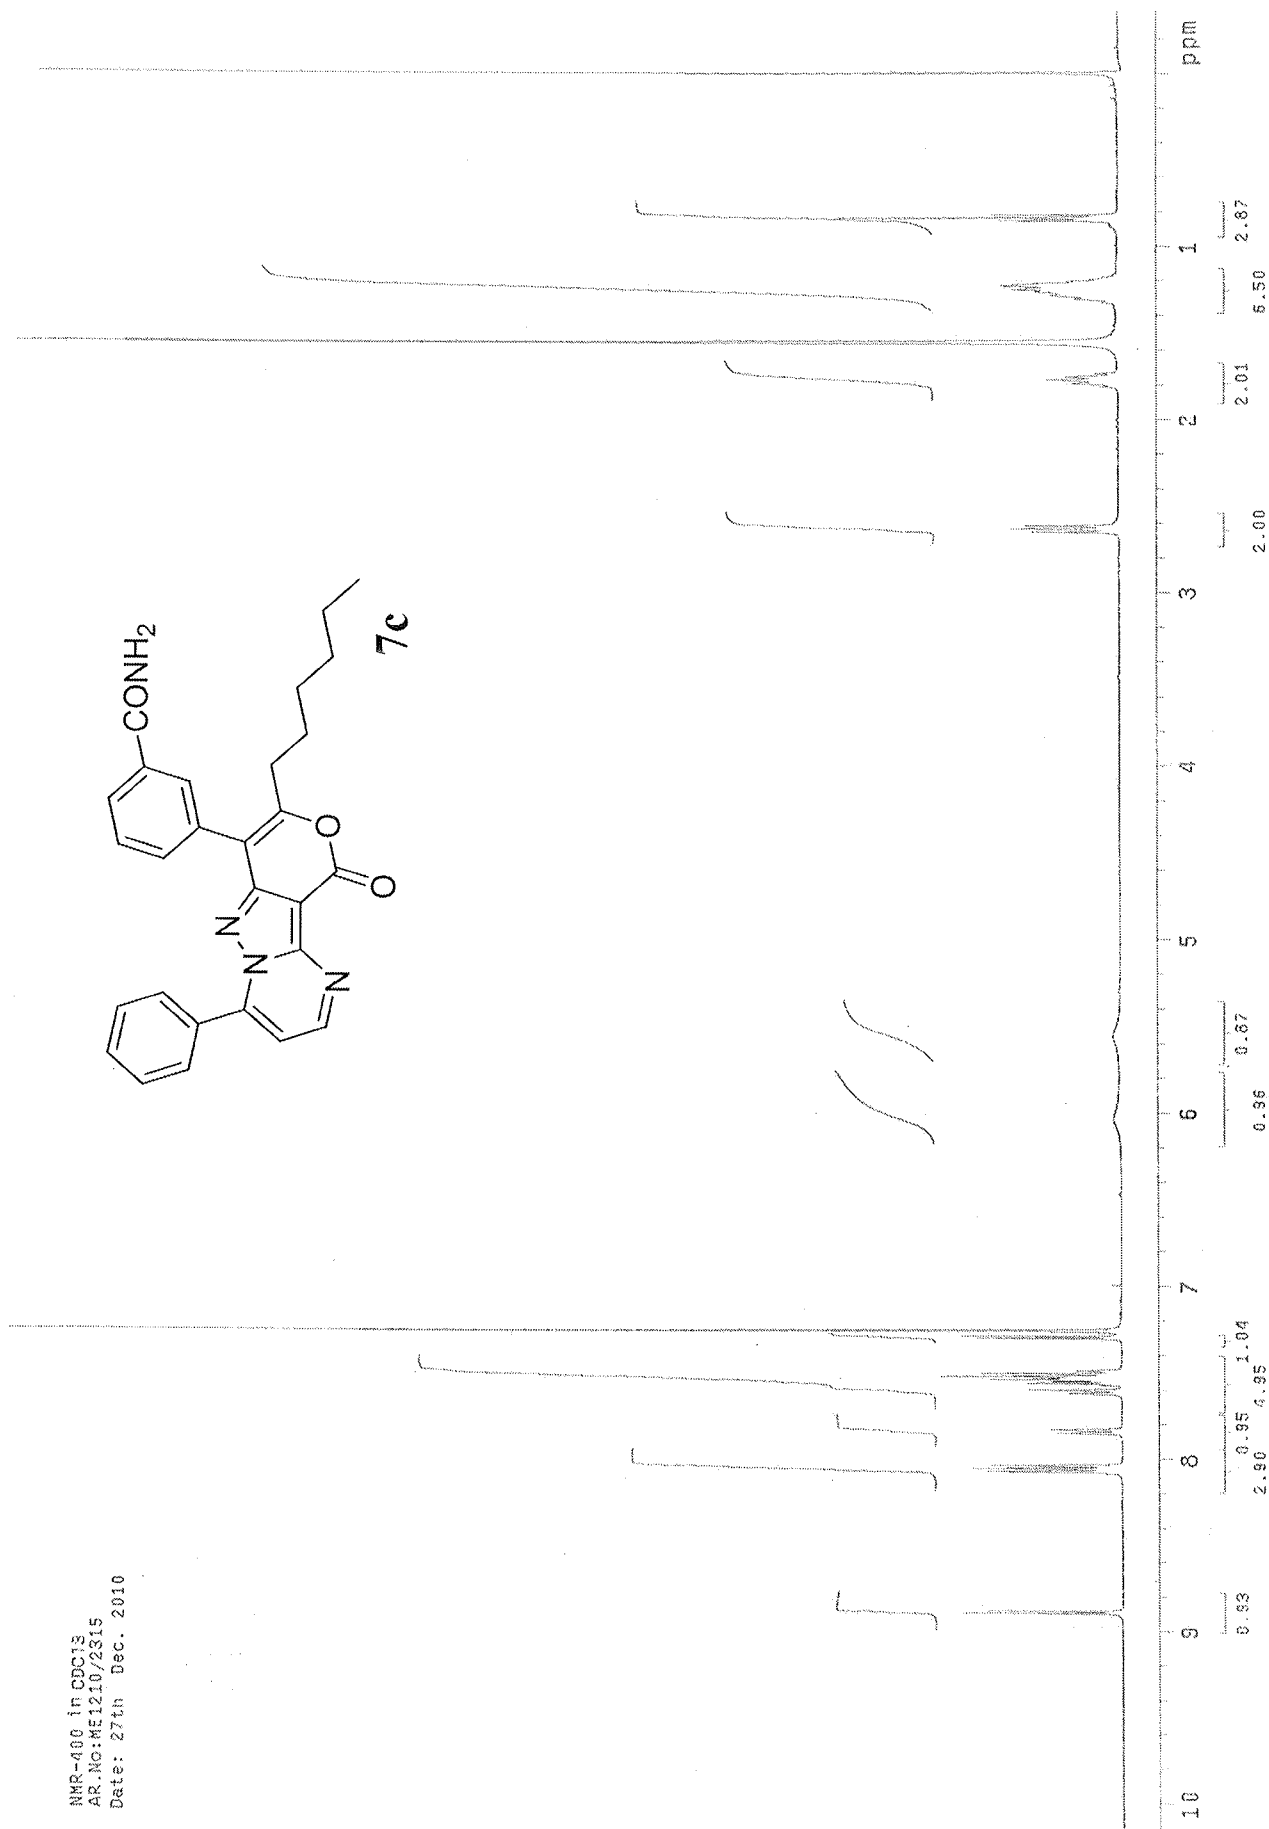

### Copies of NMR spectra

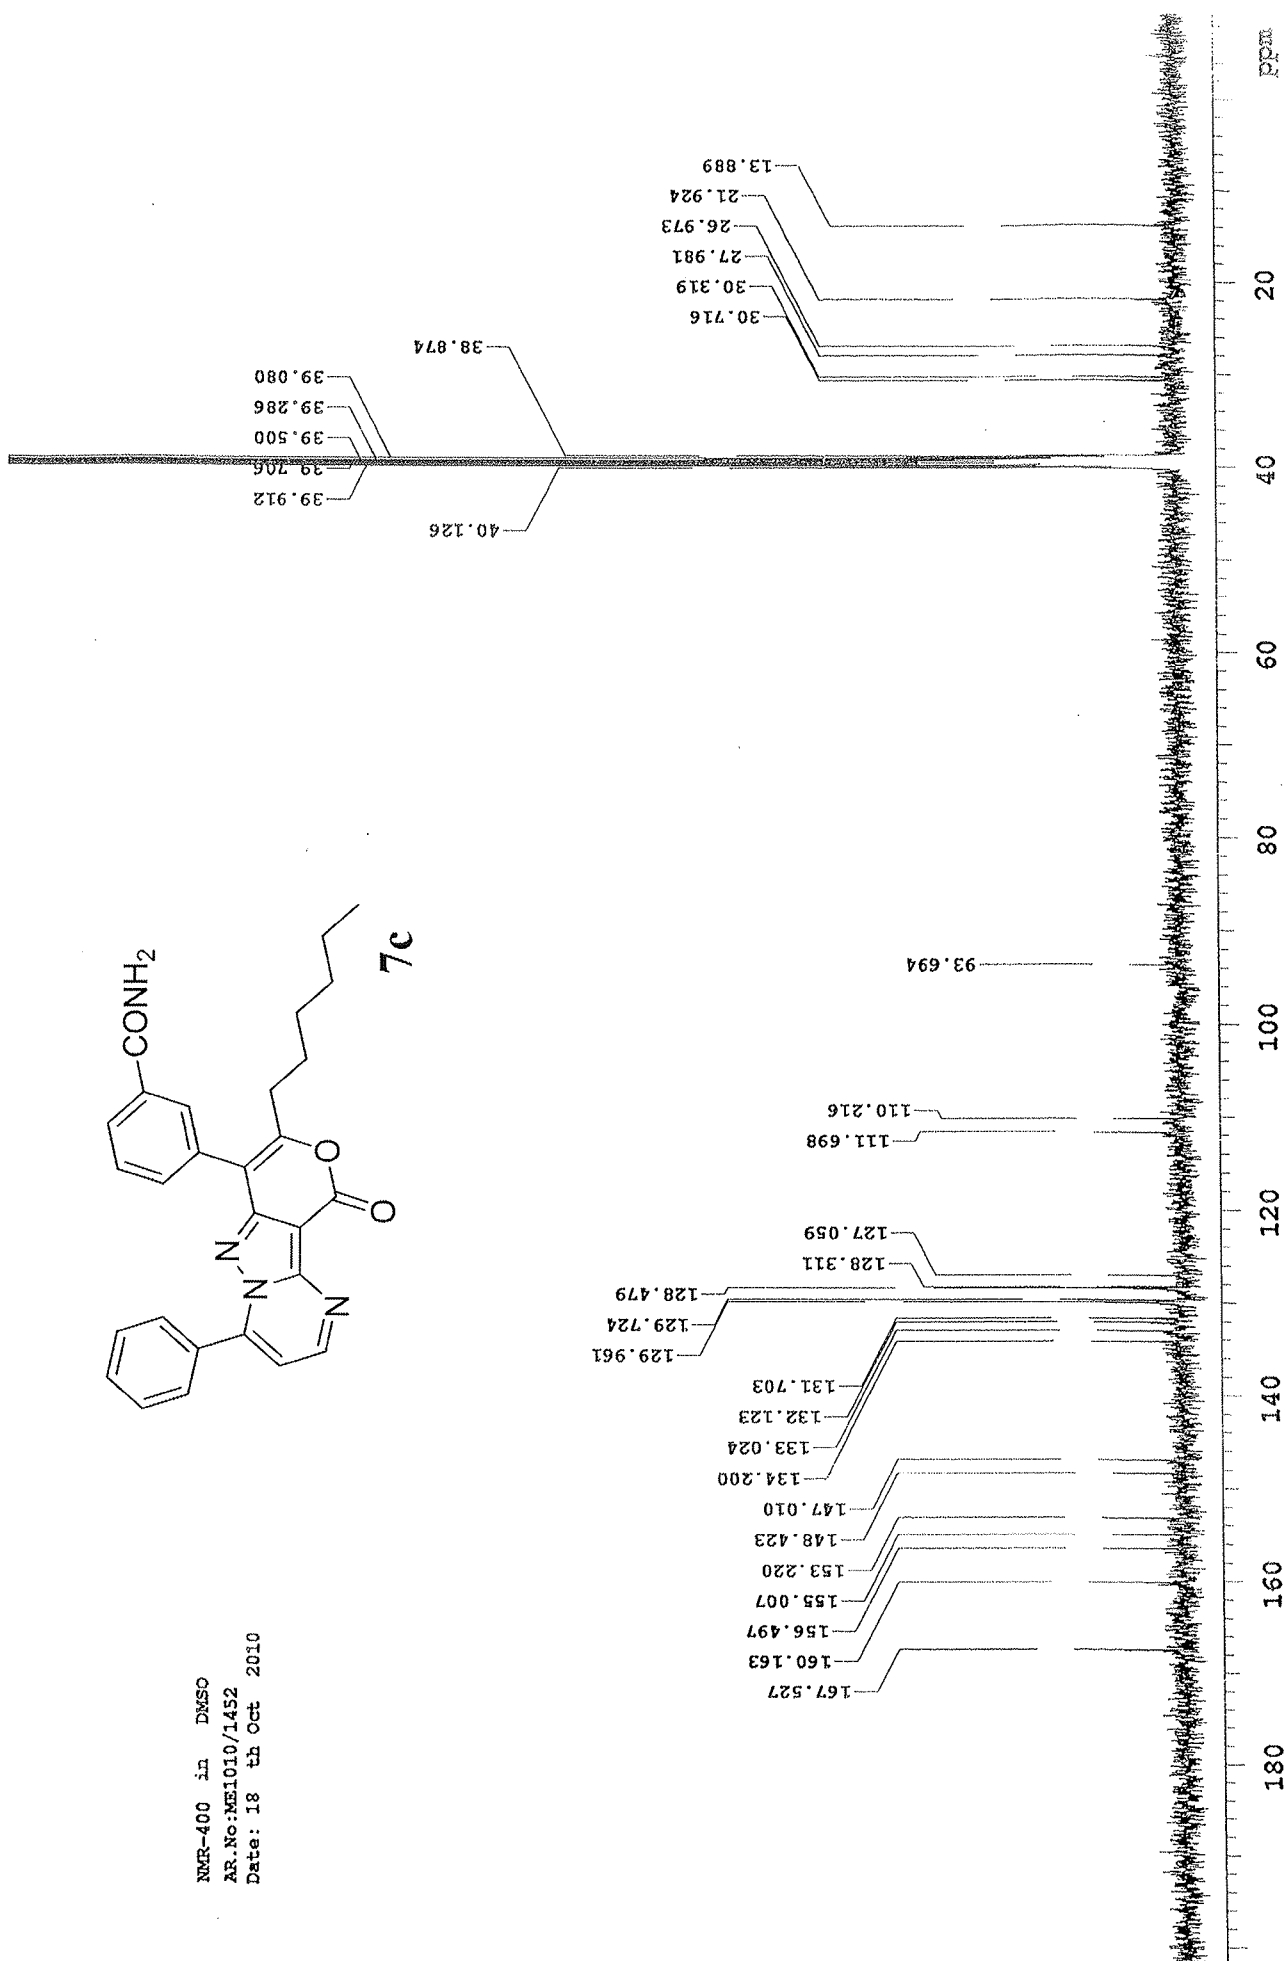

NMR-400 in DMSO  
AR.No:ME1010/1452  
Date: 18 th Oct 2010

# Copies of NMR spectra

AR&D, Aurigene Discovery Technologies Ltd, Hyderabad  
Instrument : Mercury Plus (Varian 400MHz)  
Date & Time : Wed Jun 2 11:11:54 IST 2010  
Recorded By : Srikanth.A

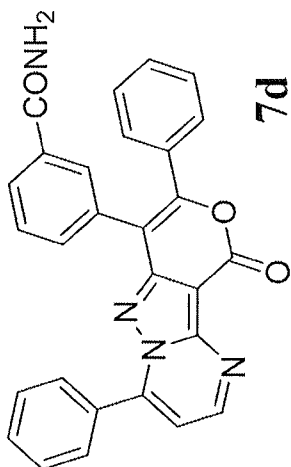

NMR-400 in CDCl3  
AR.No:ME0610/115  
Date:2nd June 2010

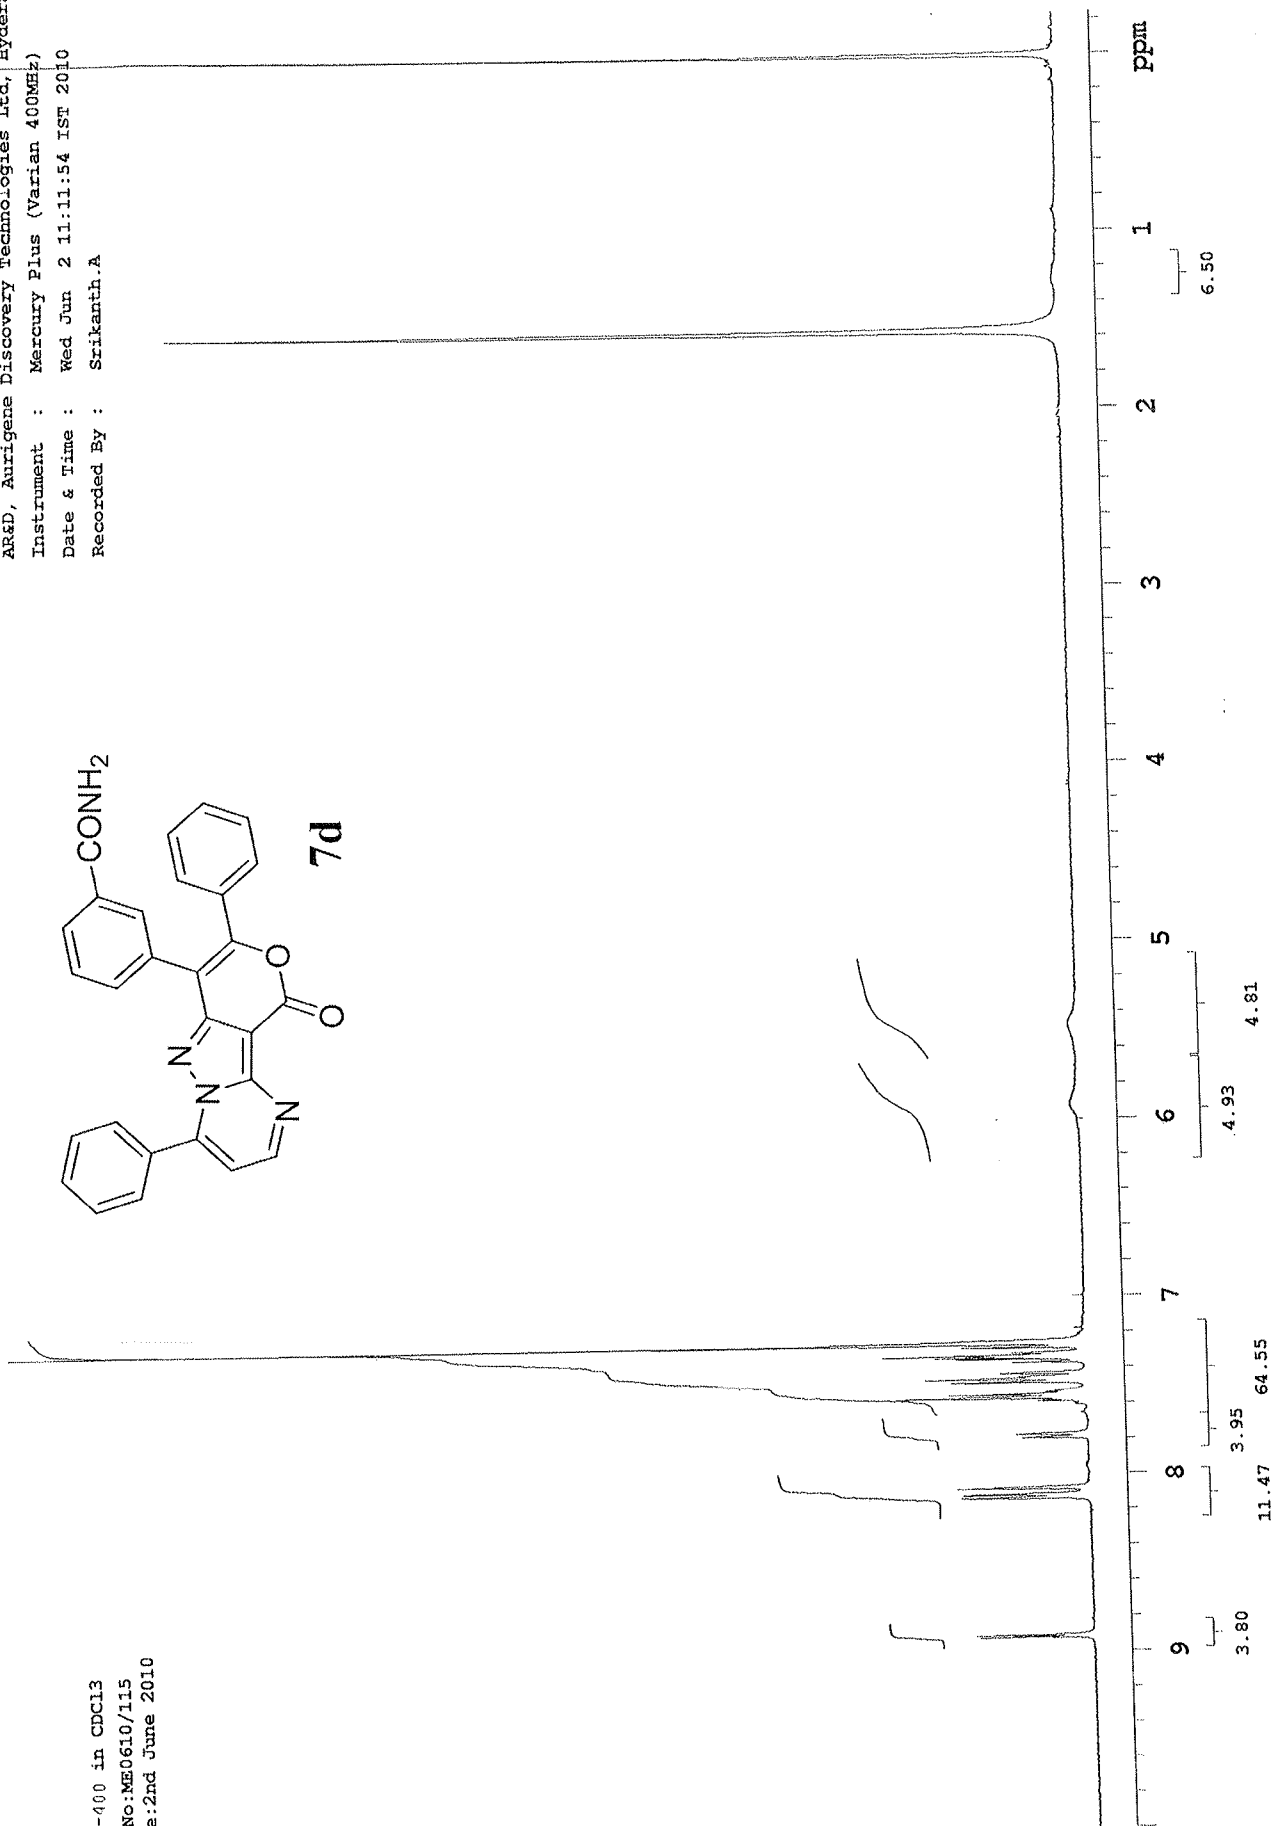

# Copies of NMR spectra

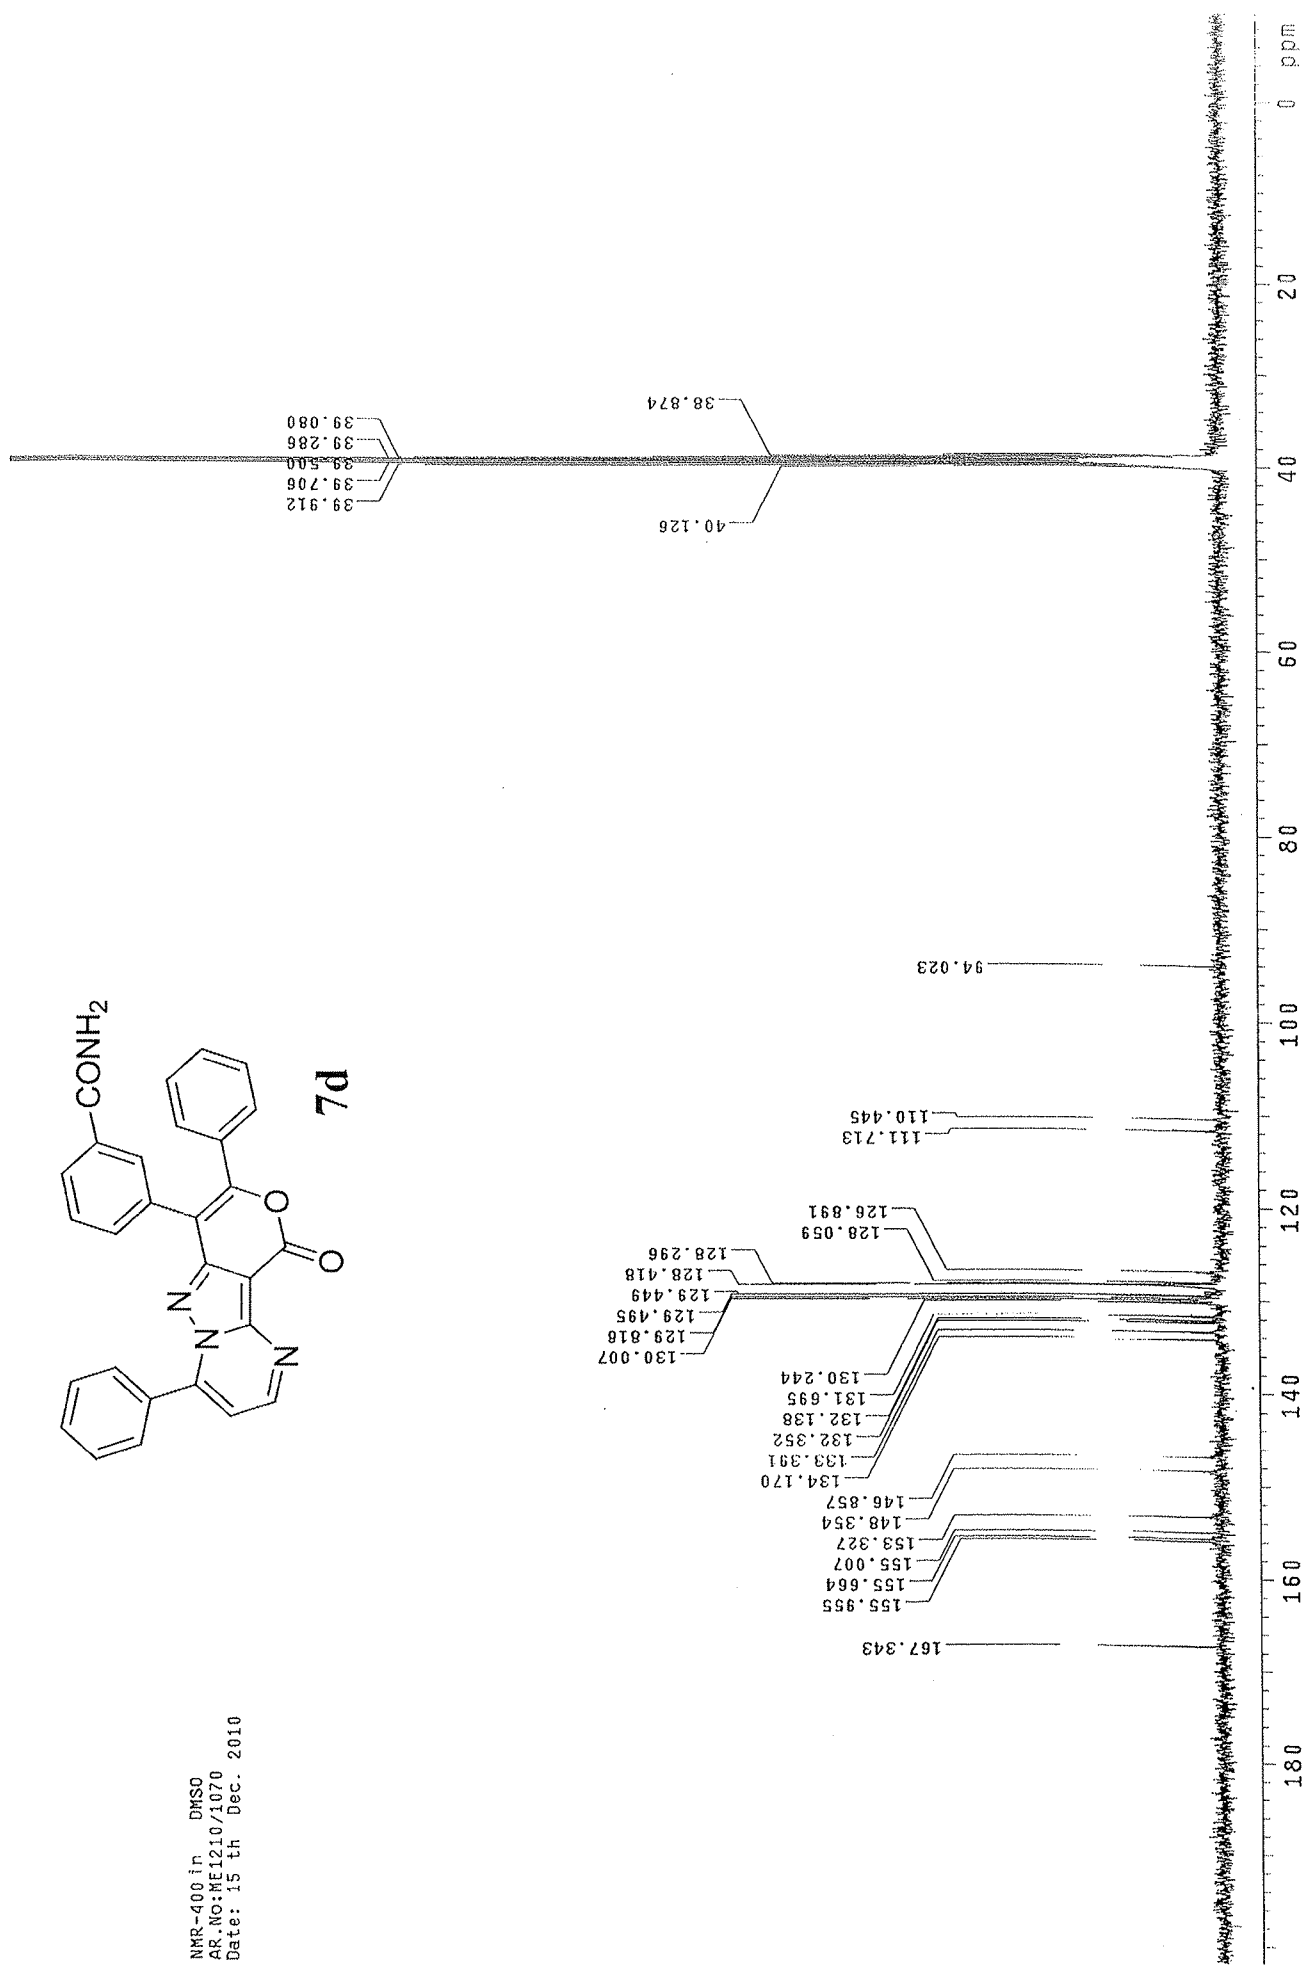

NMR-400 in DMSO  
AK.NO:ME1210/1070  
Date: 15 th Dec. 2010

# Copies of NMR spectra

NMR-400 in CDCl<sub>3</sub>  
AR.No:ME1010/1440  
Date: 18 th Oct 2010

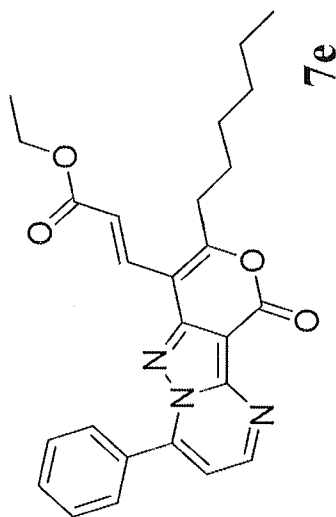

7e

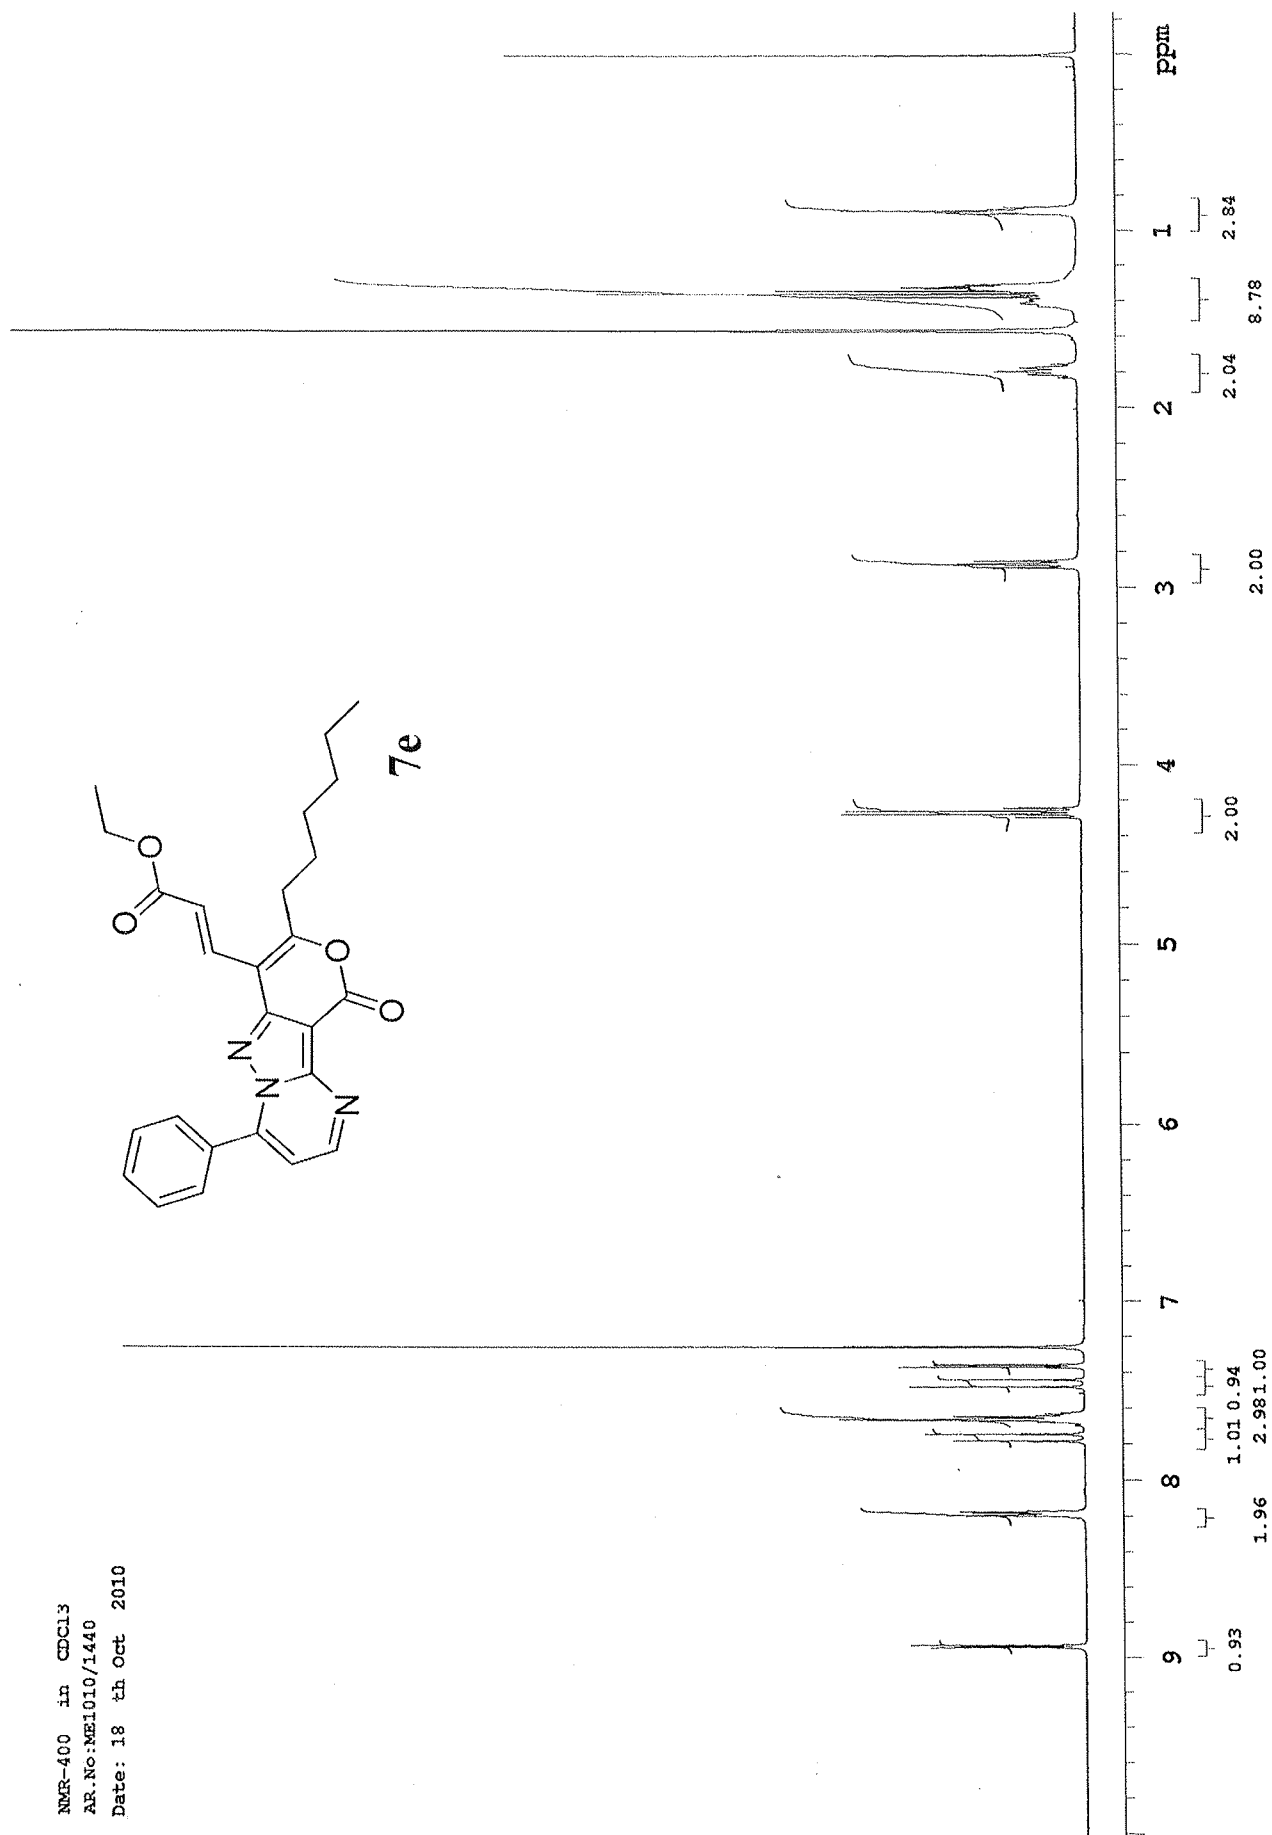

# Copies of NMR spectra

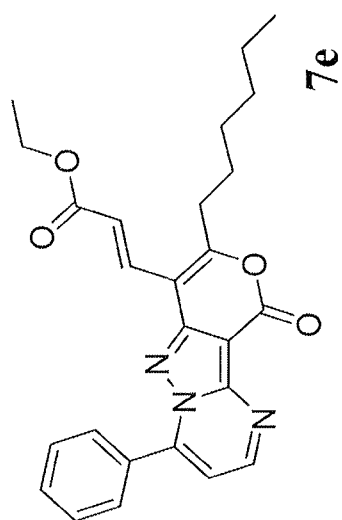

7e

NMR-400 in CDCl<sub>3</sub>  
AR.No:ME1010/2218  
Date: 26 th Oct 2010

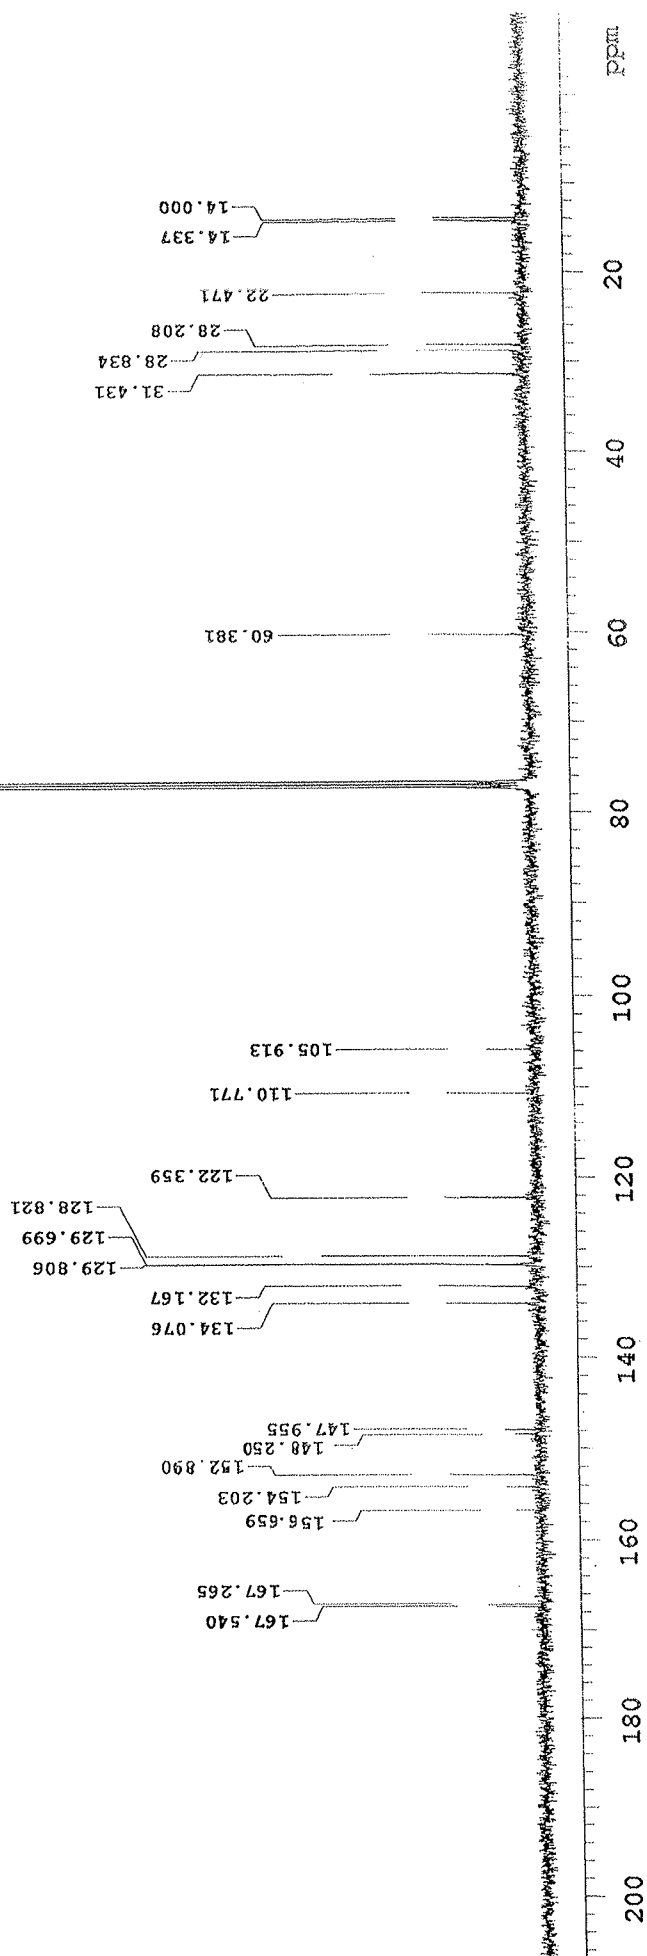



# Copies of NMR spectra

NMR-100 in CDCl<sub>3</sub>  
AR.No:ME1210/1194  
Date: 13 th Dec. 2010

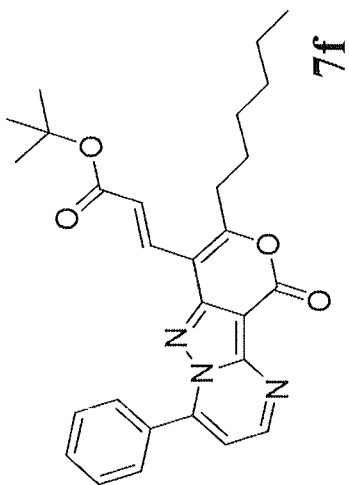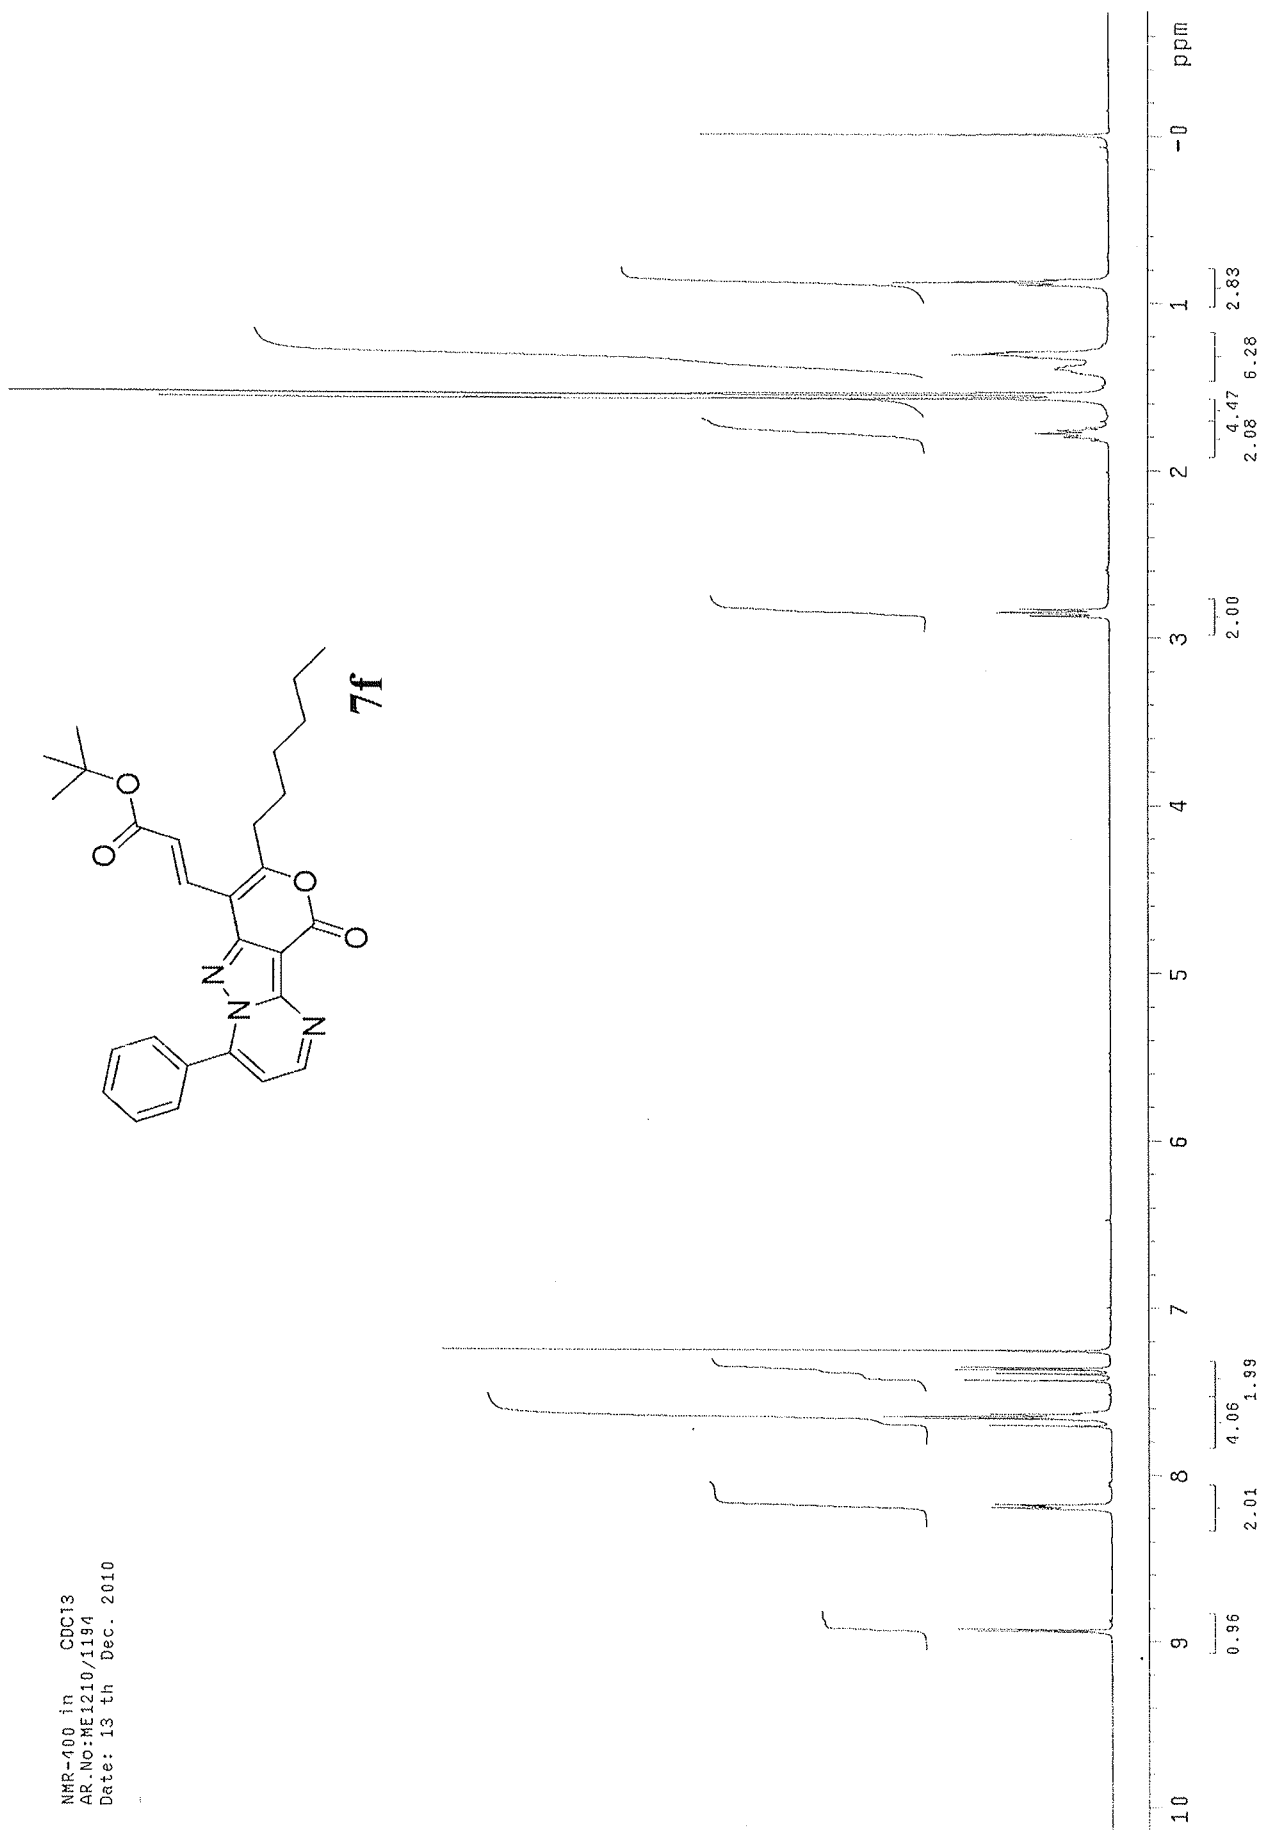

### Copies of NMR spectra

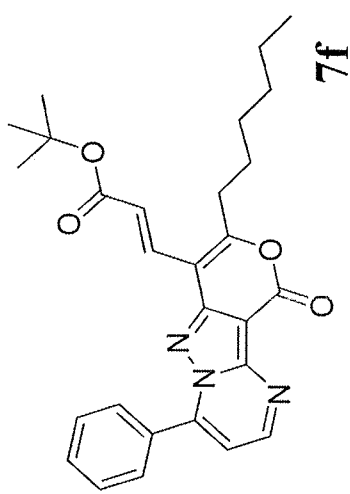

NMR-400 in CDCl<sub>3</sub>  
AR.No:ME1010/2351  
Date: 27 th Oct 2010

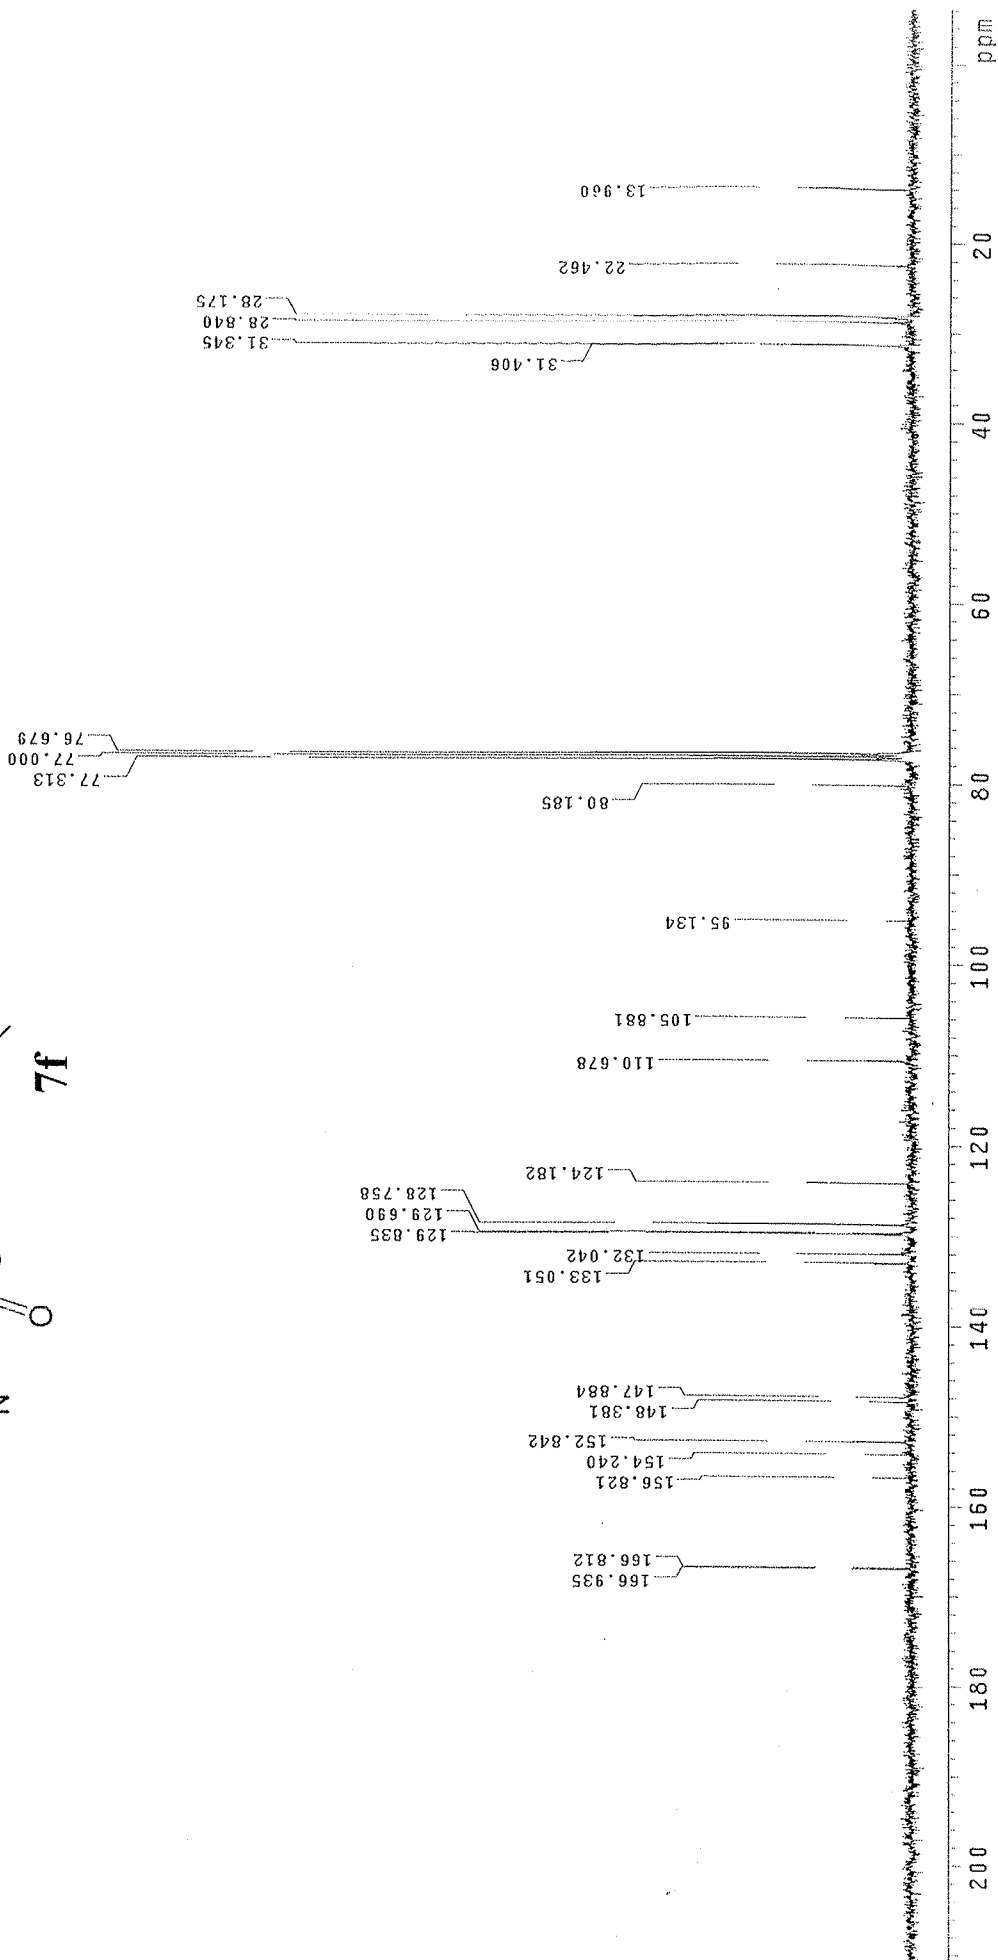

# Copies of NMR spectra

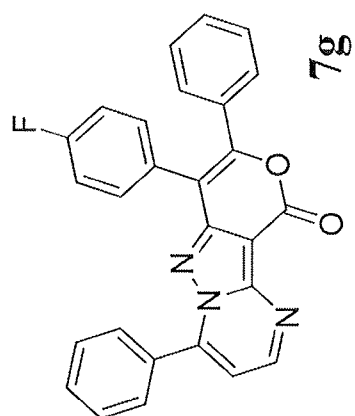

NMR-400 in CDCl<sub>3</sub>  
AR.No:ME0311/26  
Date: 01 st March. 2011

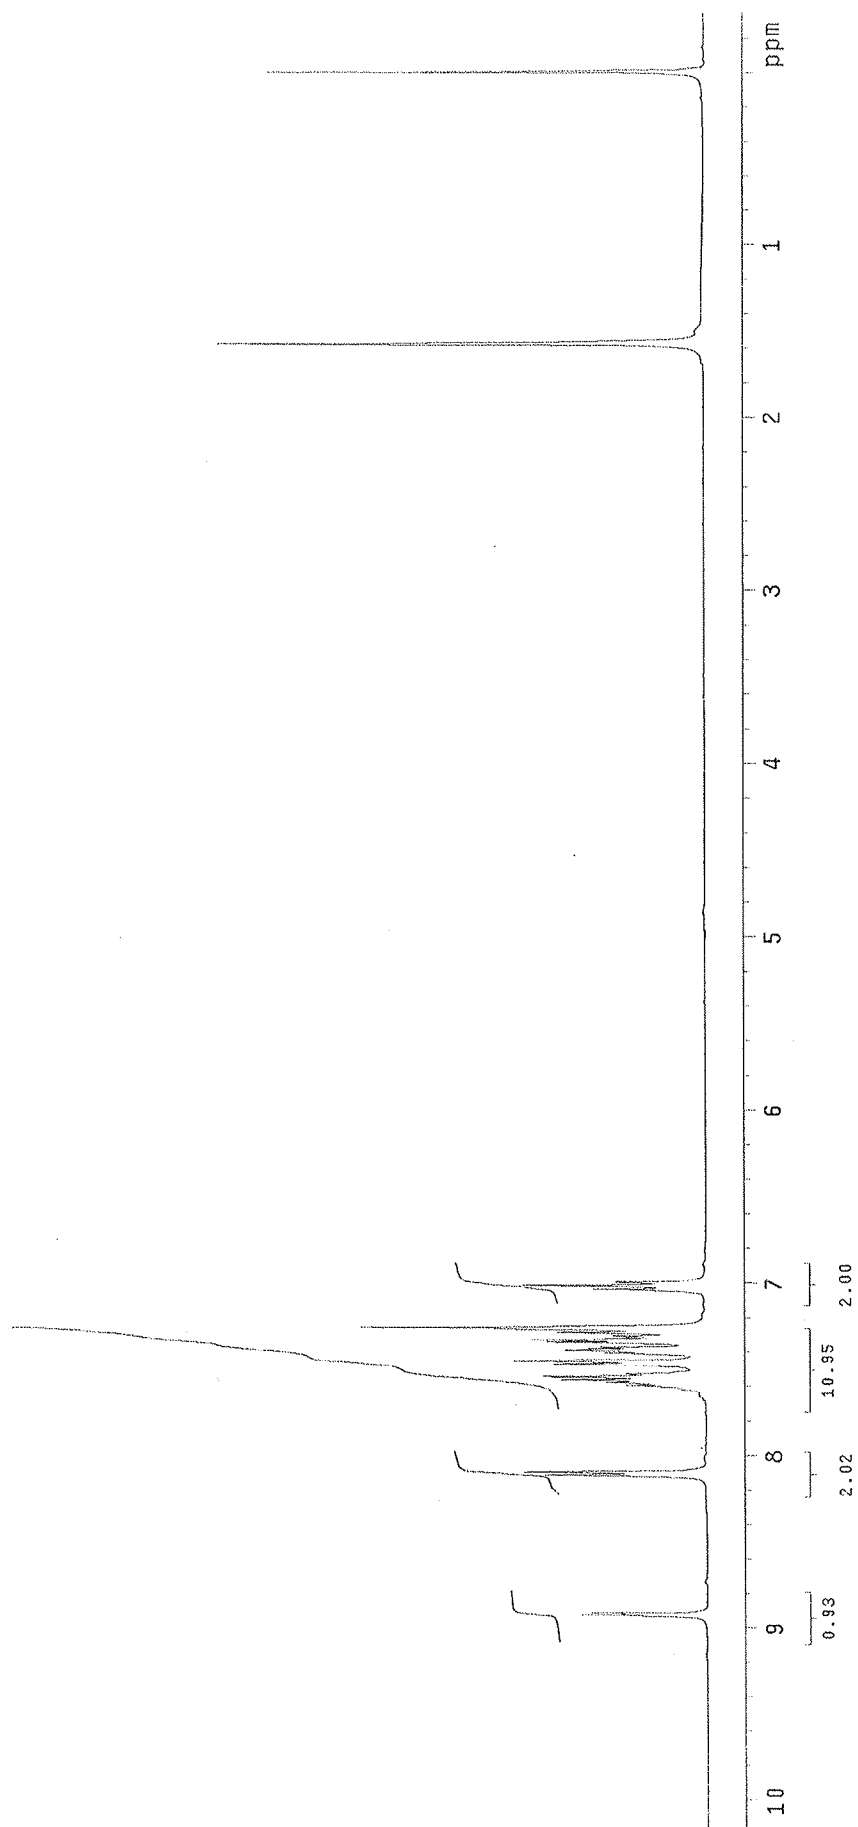

# Copies of NMR spectra

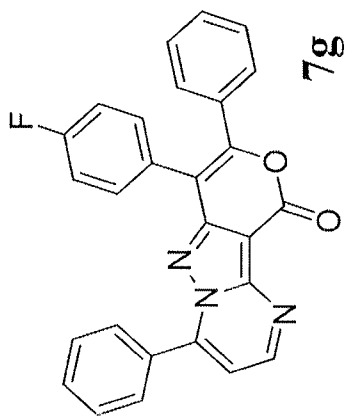

NMR-400 in CDCl<sub>3</sub>  
AR.No.:ME0311/384  
Date: 3rd March, 2011

77.321  
77.000  
76.679

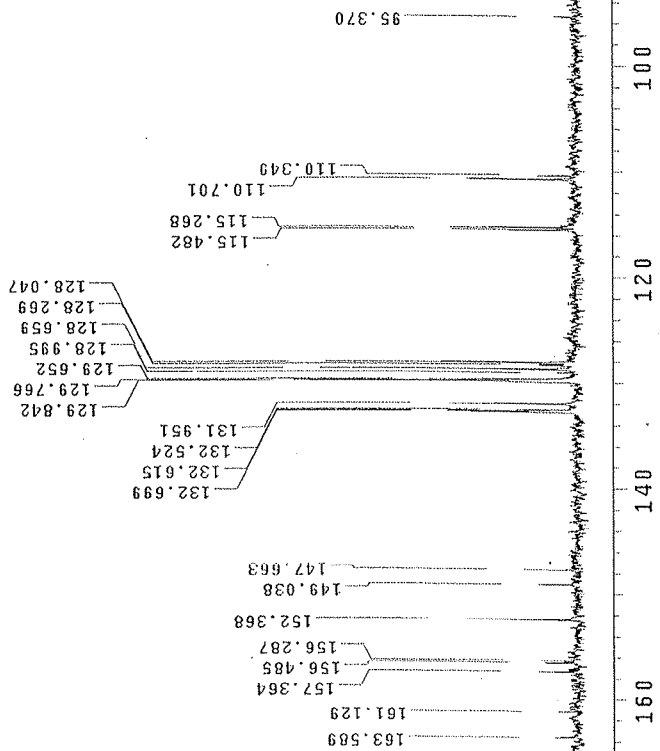

ppm

# Copies of NMR spectra

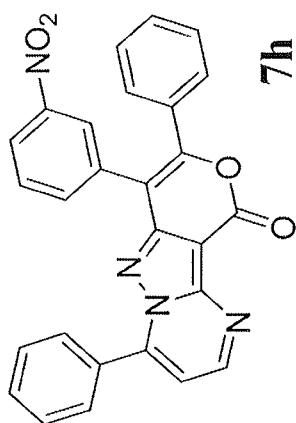

NMR-400 in CDCl<sub>3</sub>  
AK.No:ME0311/376  
Date: 3rd March, 2011

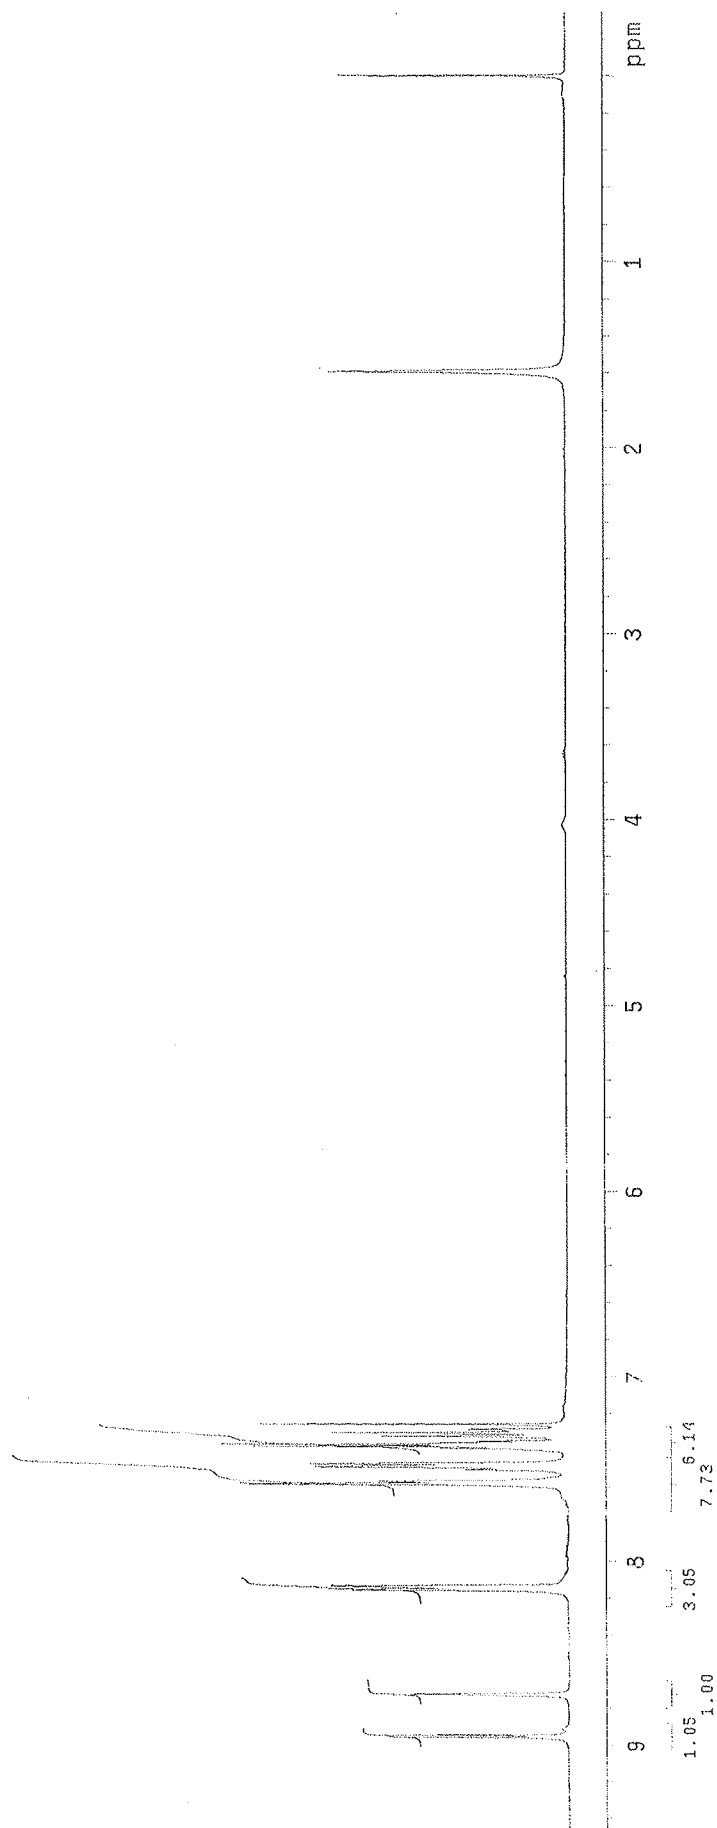

# Copies of NMR spectra

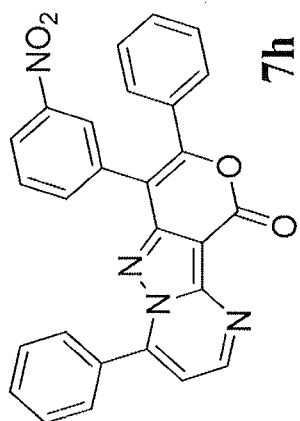

NMR-400 in CDCl<sub>3</sub>  
AR.No:ME0311/296  
Date: 2nd March, 2011

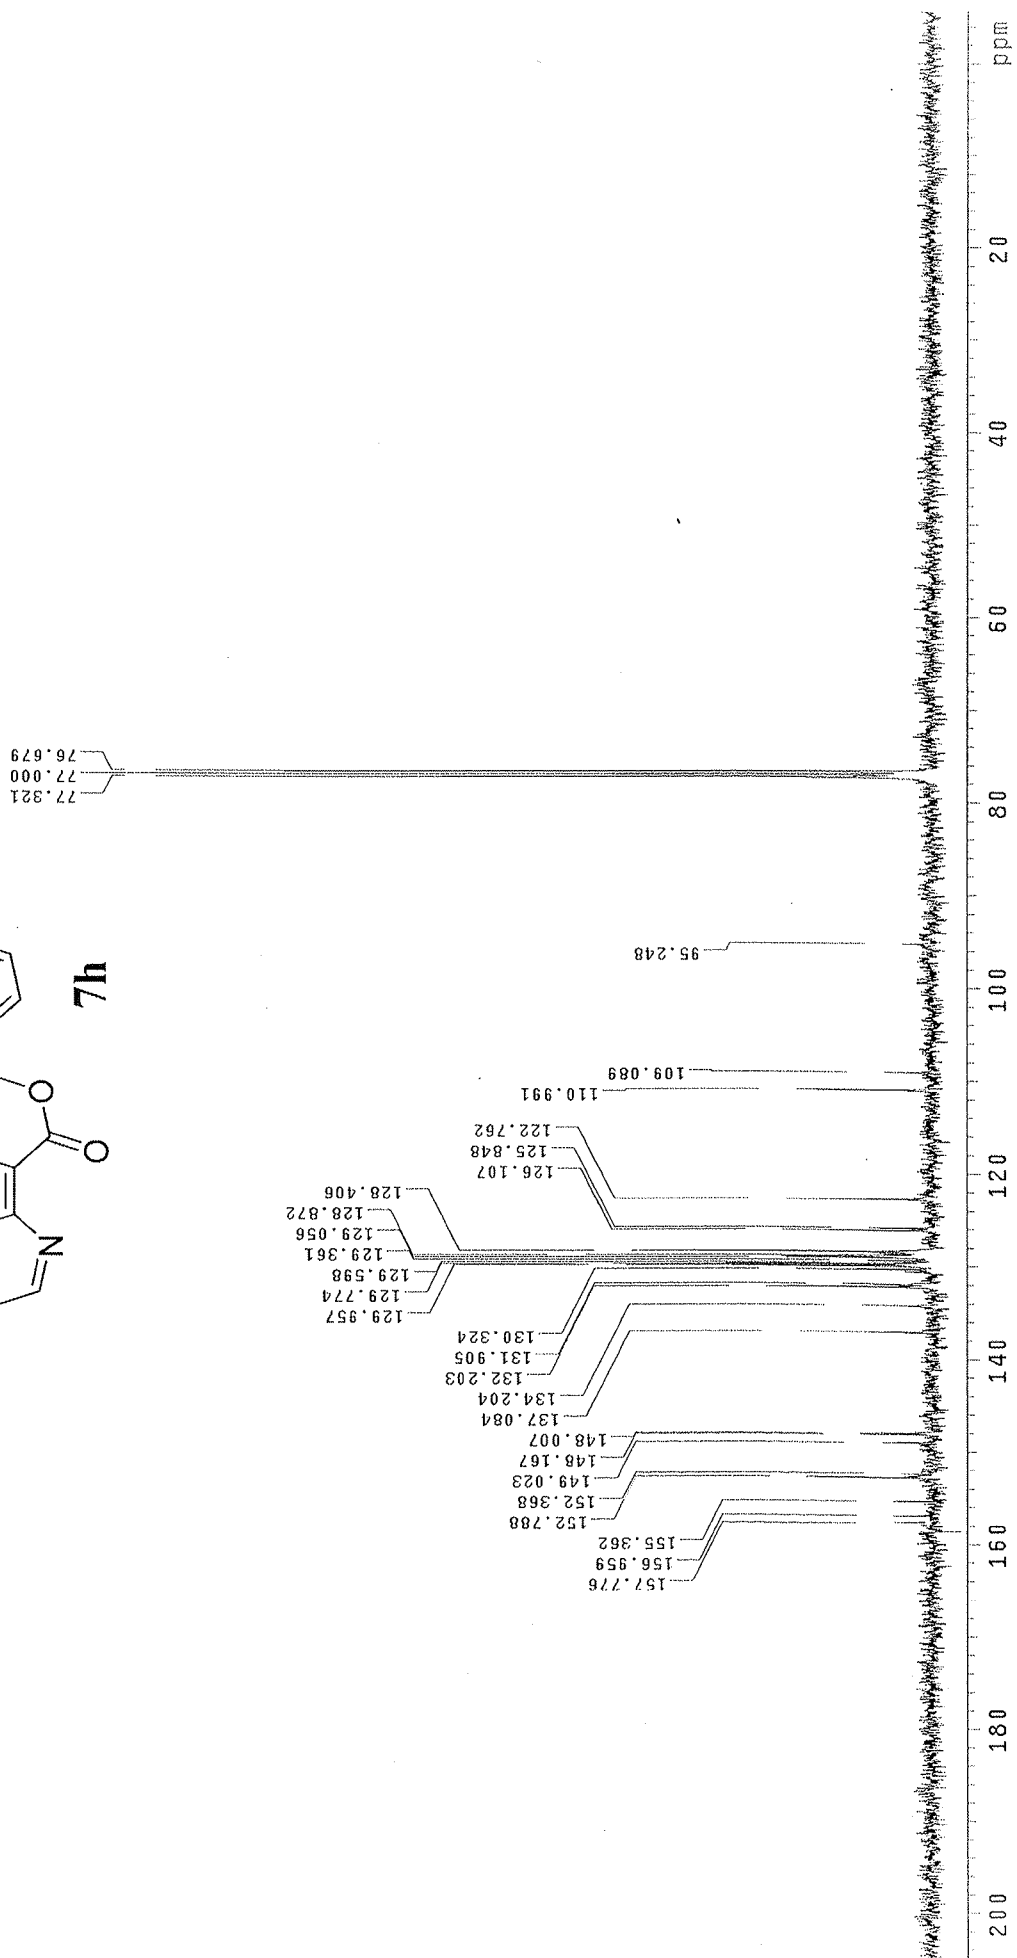

# Copies of NMR spectra

NMR-400 in CDCl<sub>3</sub>  
AR.No:ME0311/256  
Date: 2nd March, 2011

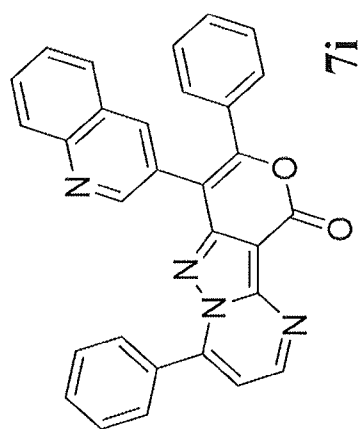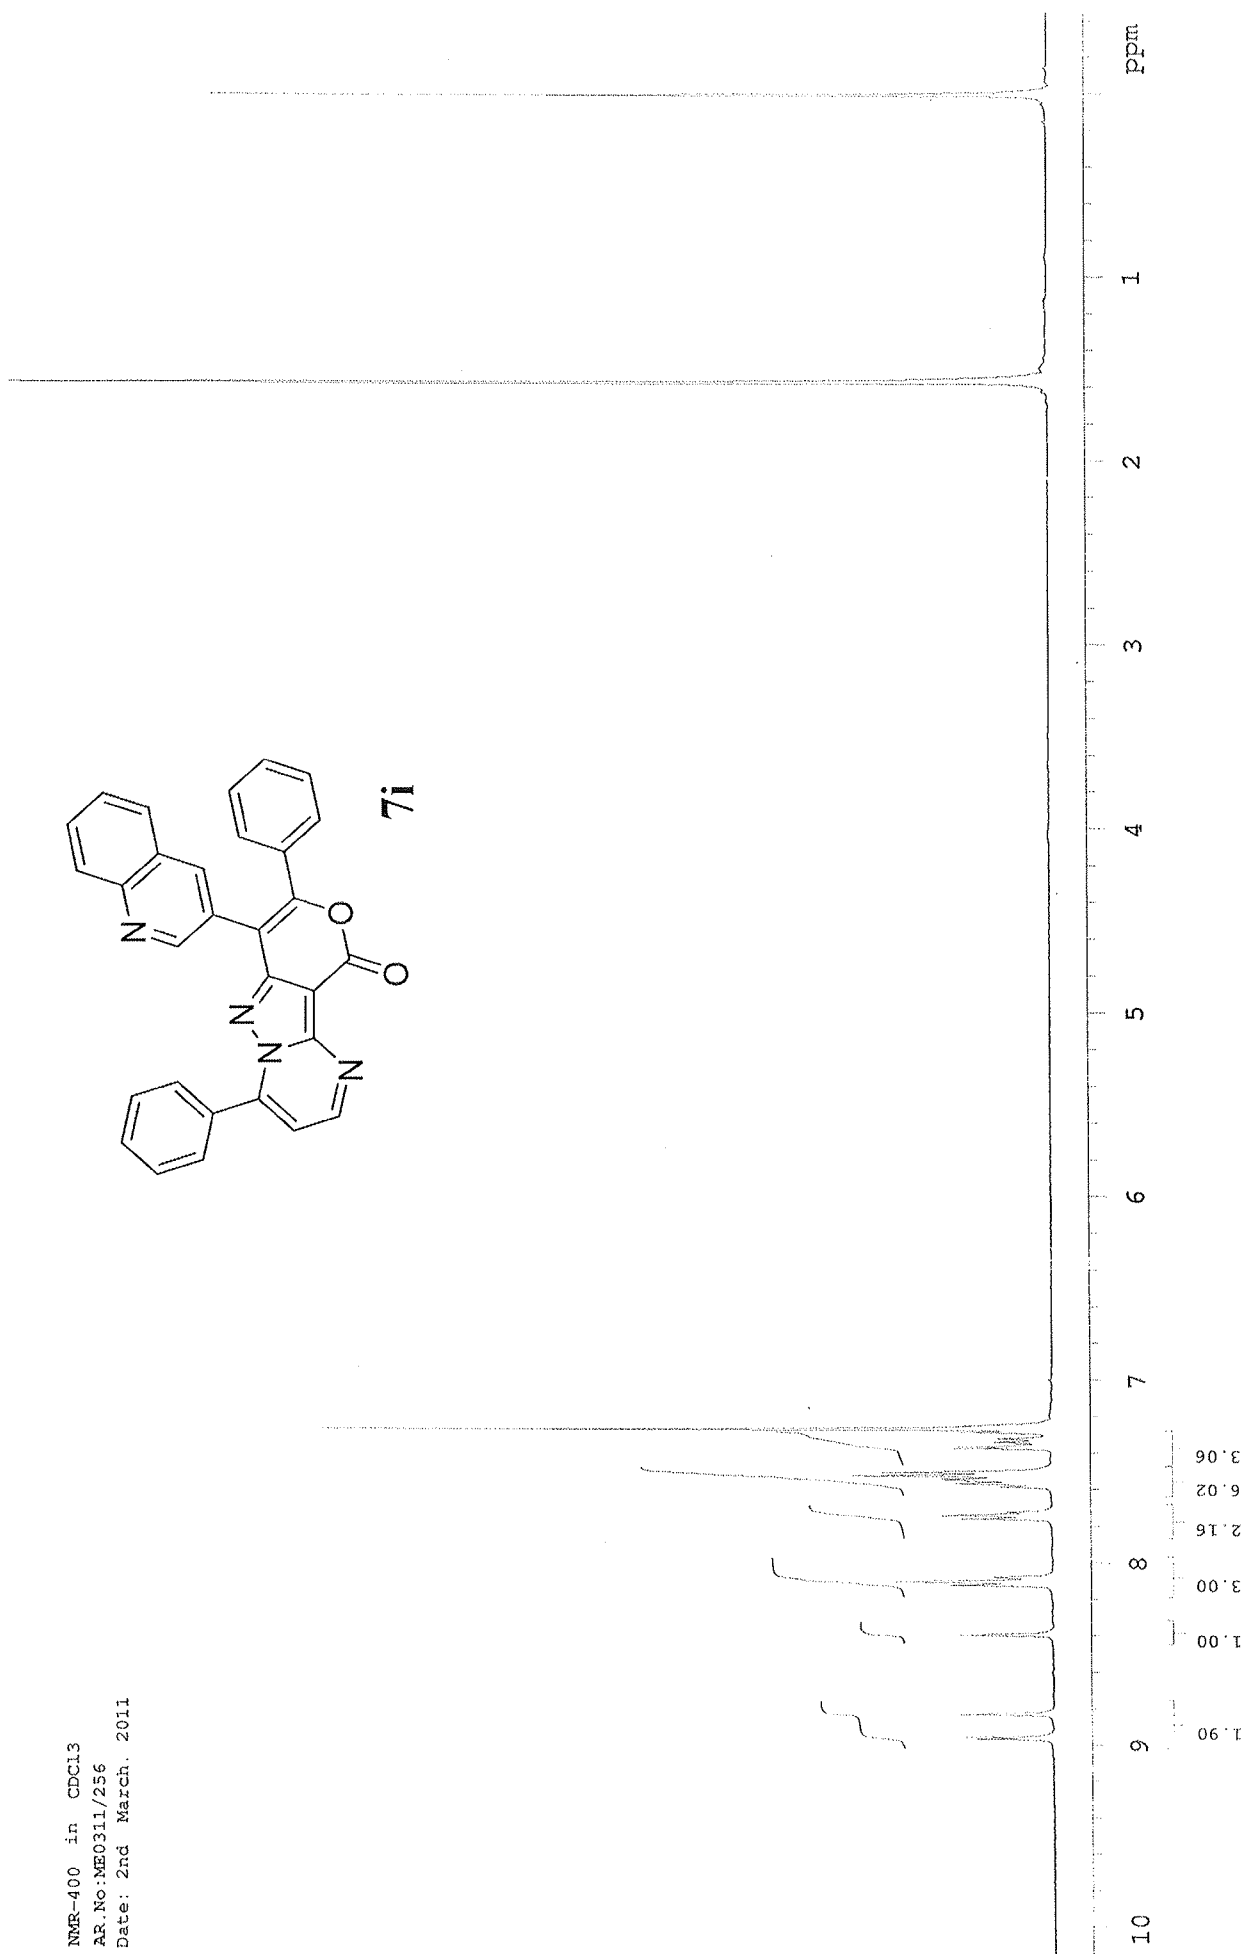

### Copies of NMR spectra

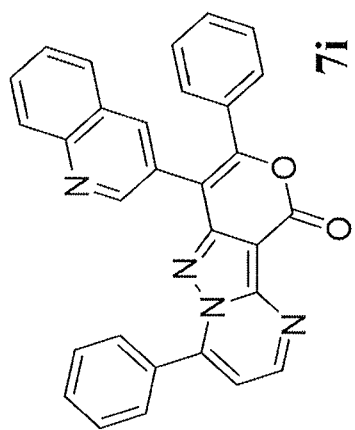

77.313  
77.000  
76.679

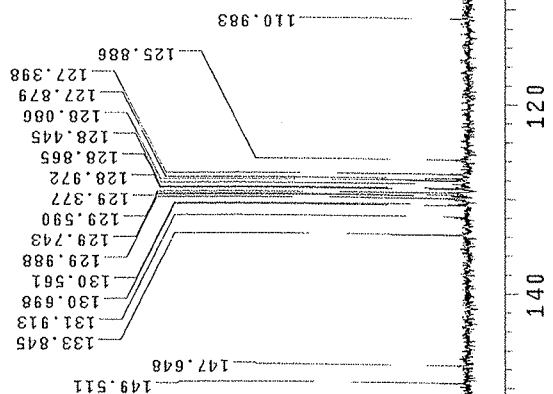

NMR-400 in CDCl3  
AR.No:ME0311/491  
Date: 4th March, 2011



CPS,MIYAPUR

# Mass Analysis Report

|                 |              |                        |         |
|-----------------|--------------|------------------------|---------|
| Data Filename   | 100303015.d  | Sample Name            | APC-1   |
| Sample Type     | Sample       | Position               | Vial 76 |
| Instrument Name | Instrument 1 | User Name              |         |
| Acq Method      | ESI.m        | IRM Calibration Status | Success |
| DA Method       | default.m    | Comment                |         |

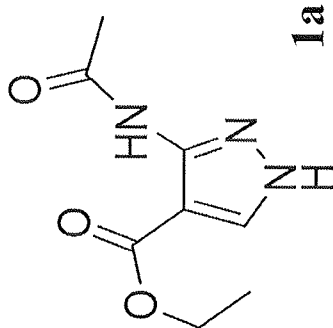

## User Spectra

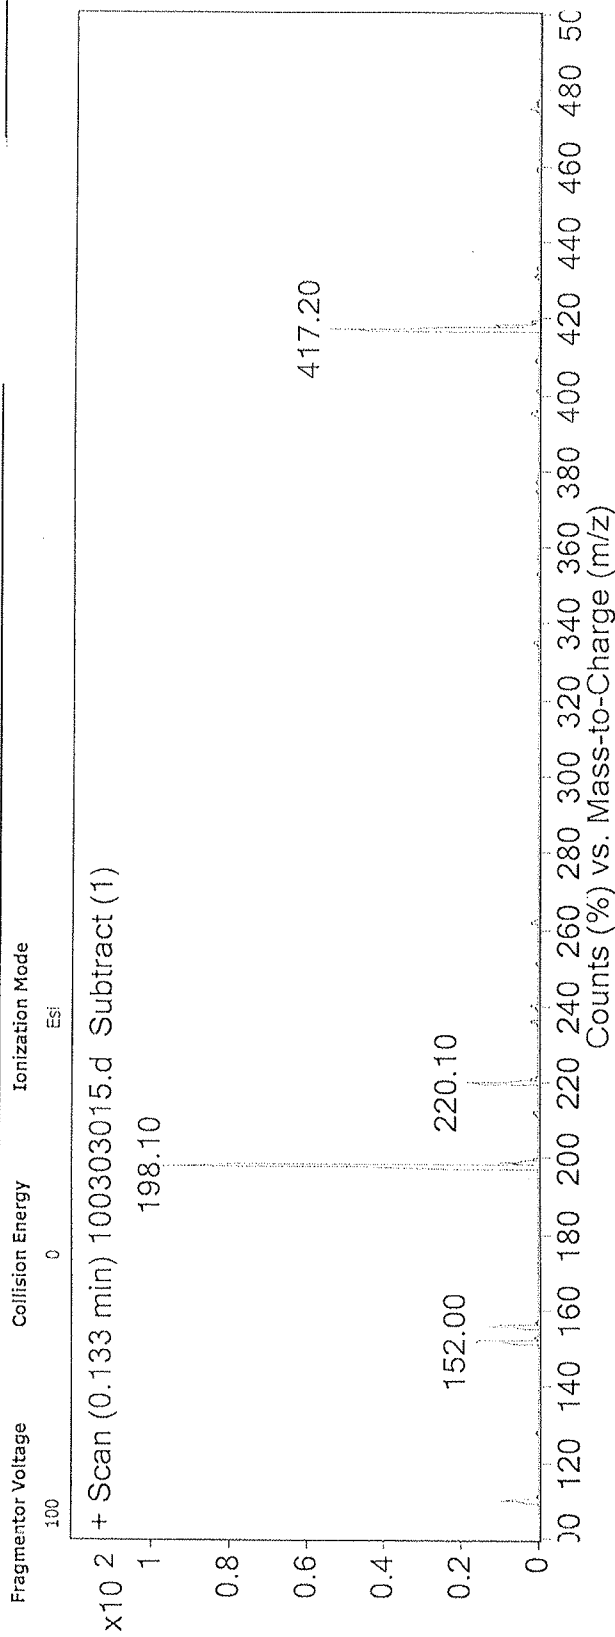

--- End Of Report ---

*Bohrer*  
23/03/10

Page 12/110

**Elemental Composition Report**

**Single Mass Analysis**

Tolerance = 5.0 PPM / DBE: min = -1.0, max = 80.0

Element prediction: Off

Number of isotope peaks used for i-FIT = 3

Monoisotopic Mass, Even Electron Ions

281 formula(e) evaluated with 1 results within limits (up to 4 best isotopic matches for each mass)

Elements Used:

C: 0-40 H: 0-55 N: 0-6 O: 0-6 Br: 0-1

APC-2

UT1210\_109 11 (0.345) Cm (11:16-41:46)

1: TOF MS ES+  
4.86e+003

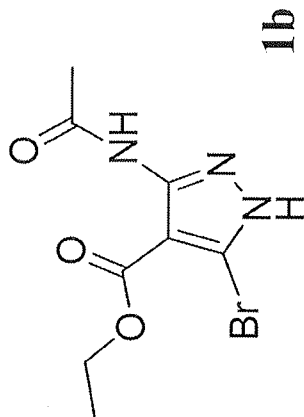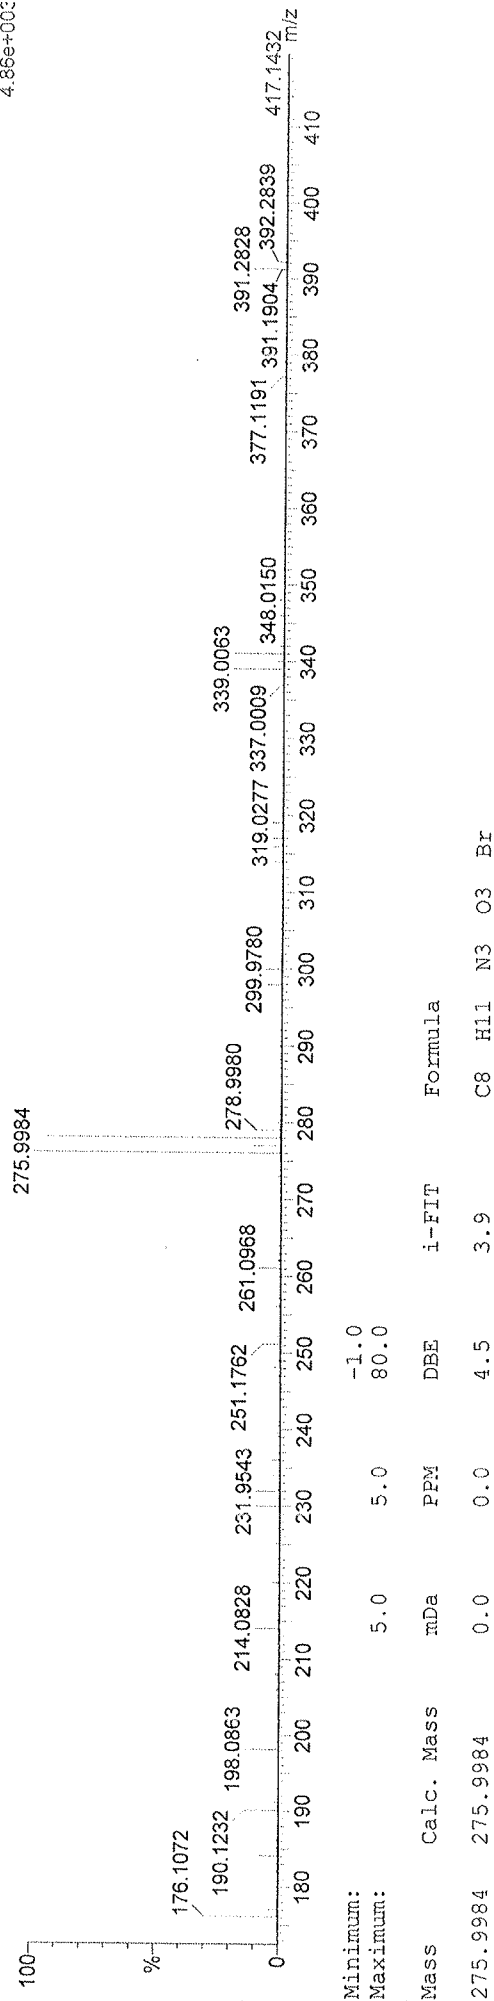

Elemental Composition Report

Page

Single Mass Analysis

Tolerance = 5.0 PPM / DBE: min = -1.0, max = 80.0  
 Element prediction: Off  
 Number of isotope peaks used for i-FIT = 3

Monoisotopic Mass, Even Electron Ions  
 151 formula(e) evaluated with 1 results within limits (up to 4 best isotopic matches for each mass)  
 Elements Used:

C: 0-30 H: 0-35 N: 0-5 O: 0-4 Br: 0-1

APC-3  
 UT1010\_263.9 (0.218) Cm (7:13-61:72)

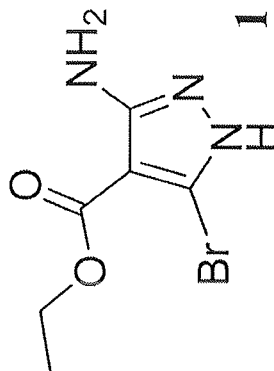

1: TOF MS ES+  
 2.35e+00

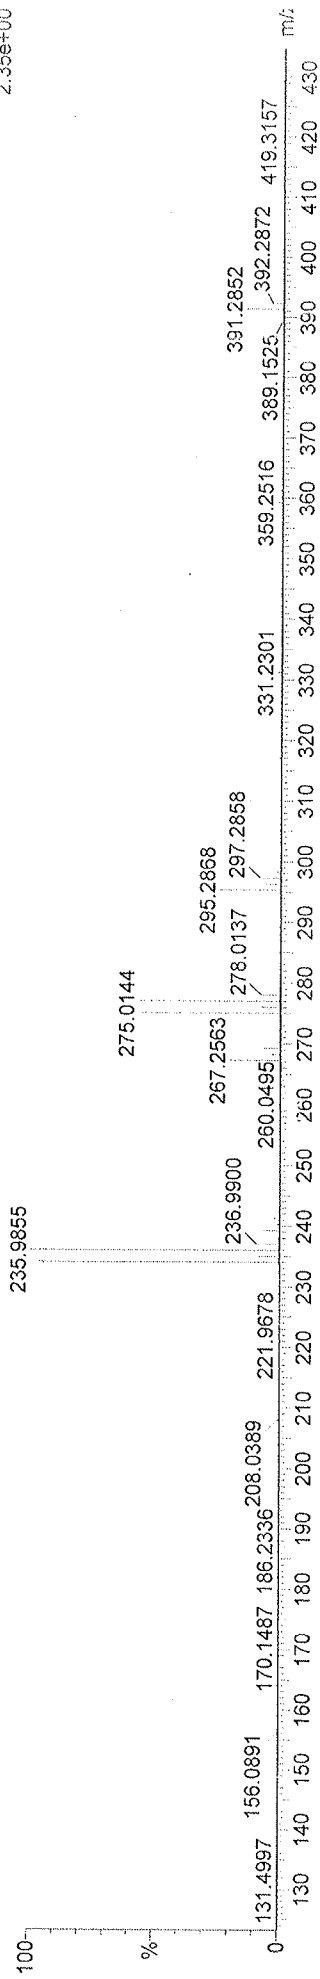

Minimum: -1.0  
 Maximum: 80.0

| Mass     | Calc. Mass | mDa  | PPM  | DBE | i-FIT | Formula        |
|----------|------------|------|------|-----|-------|----------------|
| 233.9874 | 233.9878   | -0.4 | -1.7 | 3.5 | 2.2   | C6 H9 N3 O2 Br |

## Elemental Composition Report

### Single Mass Analysis

Tolerance = 5.0 PPM / DBE: min = -1.0, max = 80.0  
 Element prediction: Off  
 Number of isotope peaks used for i-FIT = 3

Monoisotopic Mass, Even Electron Ions  
 103 formula(e) evaluated with 1 results within limits (up to 4 best isotopic matches for each mass)  
 Elements Used:

C: 0-40 H: 0-55 N: 0-6 O: 0-6  
 KSM-2A  
 UT1210\_108 18 (0.569) Cm (18:20-47:50)

1: TOF MS ES+  
 7.04e+003

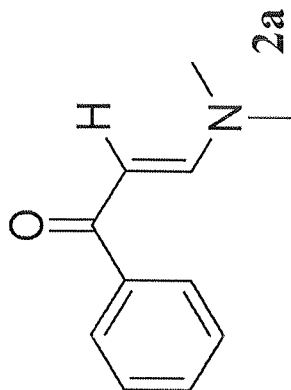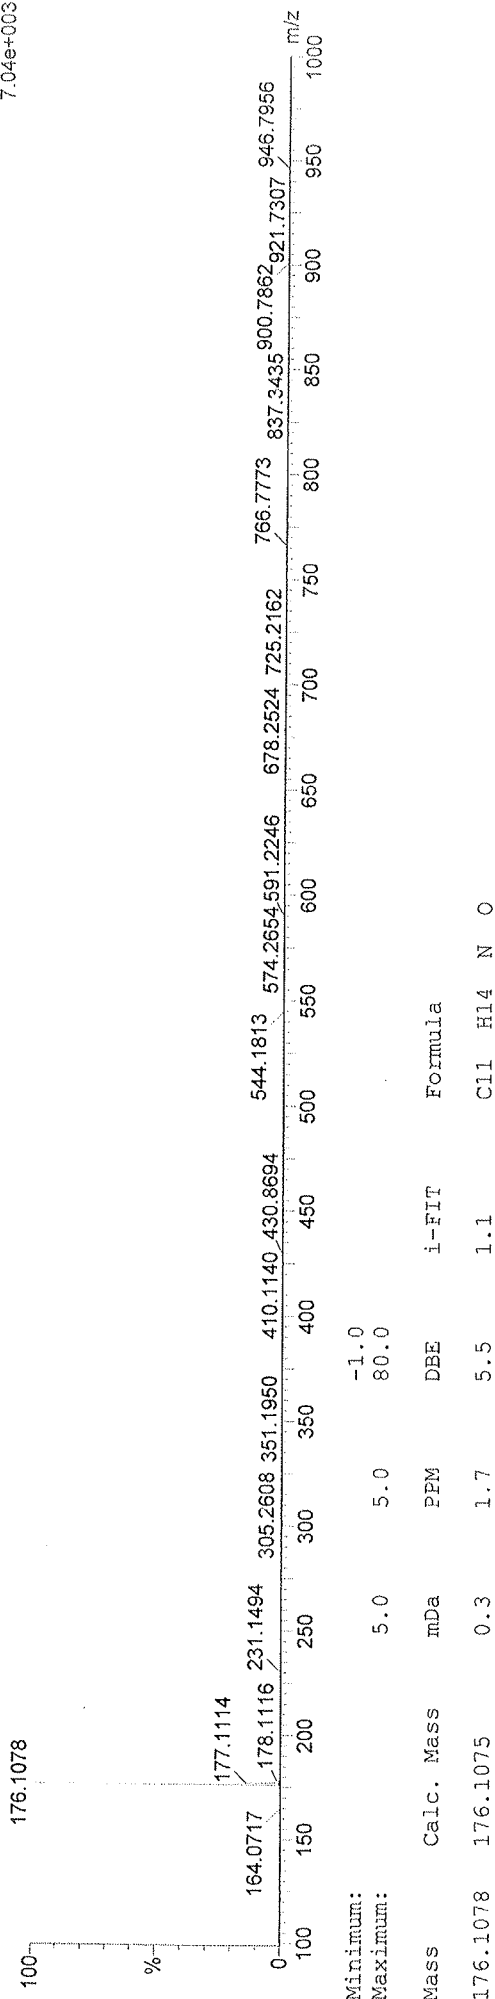

6/12/10

2012110

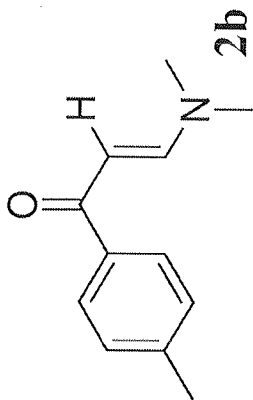

1: TOF MS ES+  
 3.19e+003

### Elemental Composition Report

#### Single Mass Analysis

Tolerance = 5.0 PPM / DBE: min = -1.0, max = 80.0

Element prediction: Off

Number of isotope peaks used for i-FIT = 3

Monoisotopic Mass, Even Electron Ions

111 formula(e) evaluated with 1 results within limits (up to 4 best isotopic matches for each mass)

Elements Used:

C: 0-40 H: 0-55 N: 0-6 O: 0-6

KSM-2B

UT1210\_107 27 (0.841) Cm (24:27-57:61)

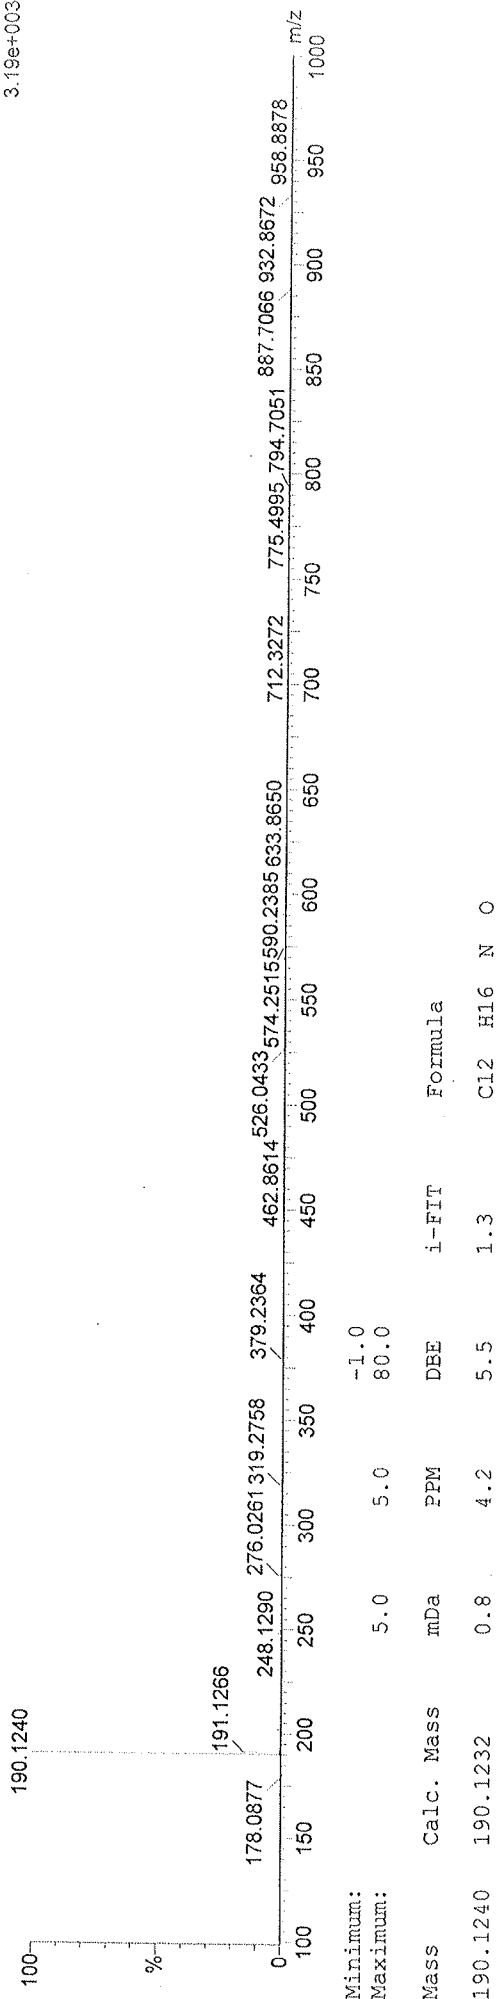

## Elemental Composition Report

### Single Mass Analysis

Tolerance = 5.0 PPM / DBE: min = -1.0, max = 80.0

Element prediction: Off

Number of isotope peaks used for i-FIT = 3

Monoisotopic Mass, Even Electron Ions

244 formula(e) evaluated with 1 results within limits (up to 4 best isotopic matches for each mass)

Elements Used:

C: 0-40 H: 0-55 N: 0-6 O: 0-6 Br: 0-1

KSM-2C

UT1210\_106 17 (0.547) Cm (17:20-49:56)

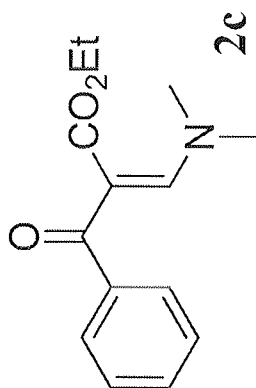

1: TOF MS ES+  
5.72e+003

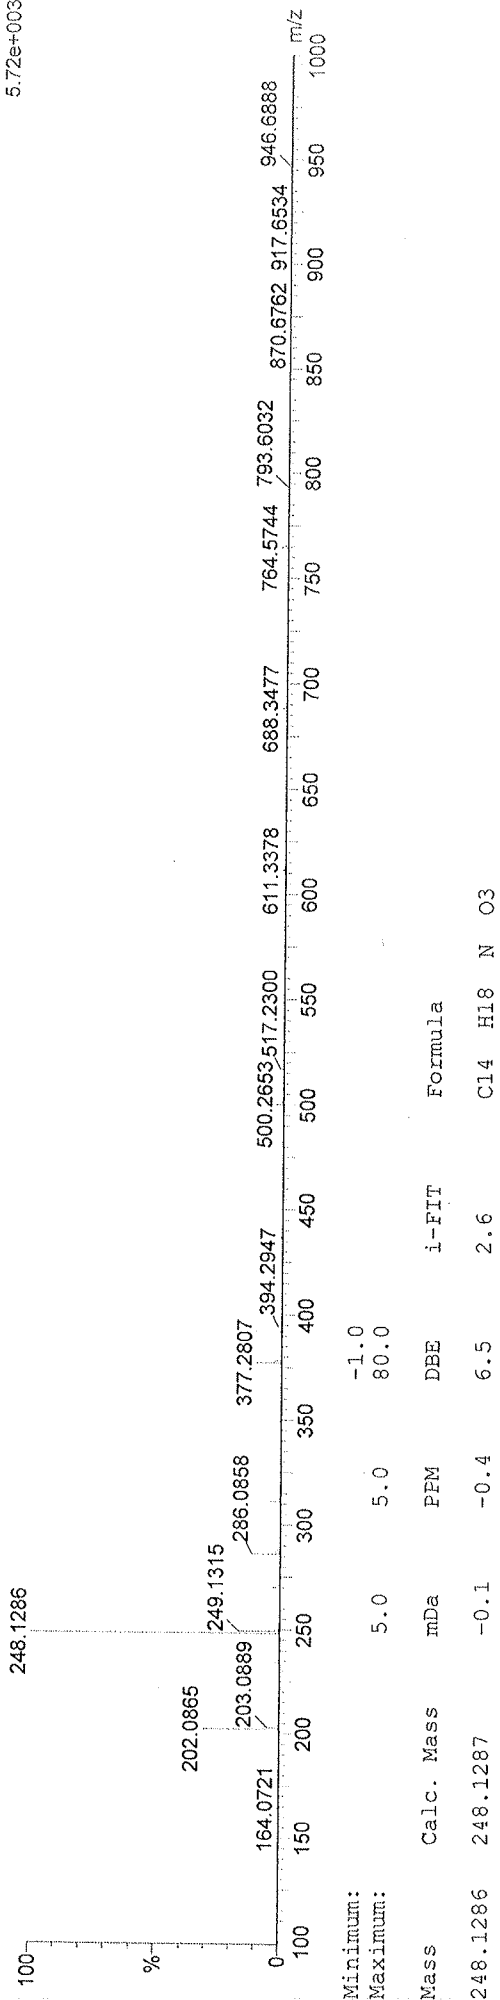

### Elemental Composition Report

#### Single Mass Analysis

Tolerance = 5.0 PPM / DBE: min = -1.0, max = 80.0  
 Element prediction: Off  
 Number of isotope peaks used for i-FIT = 2

Monoisotopic Mass, Even Electron Ions  
 214 formula(e) evaluated with 1 results within limits (up to 4 closest results for each mass)  
 Elements Used:

C: 0-25 H: 0-30 N: 0-5 O: 0-6 Br: 0-1

BPPC-1  
 UT0910\_102.27 (0.615) Cm (26:31-68:77)

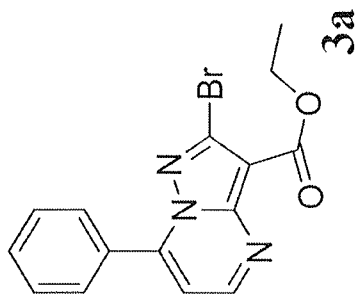

1: TOF MS ES+  
 2.24e+003

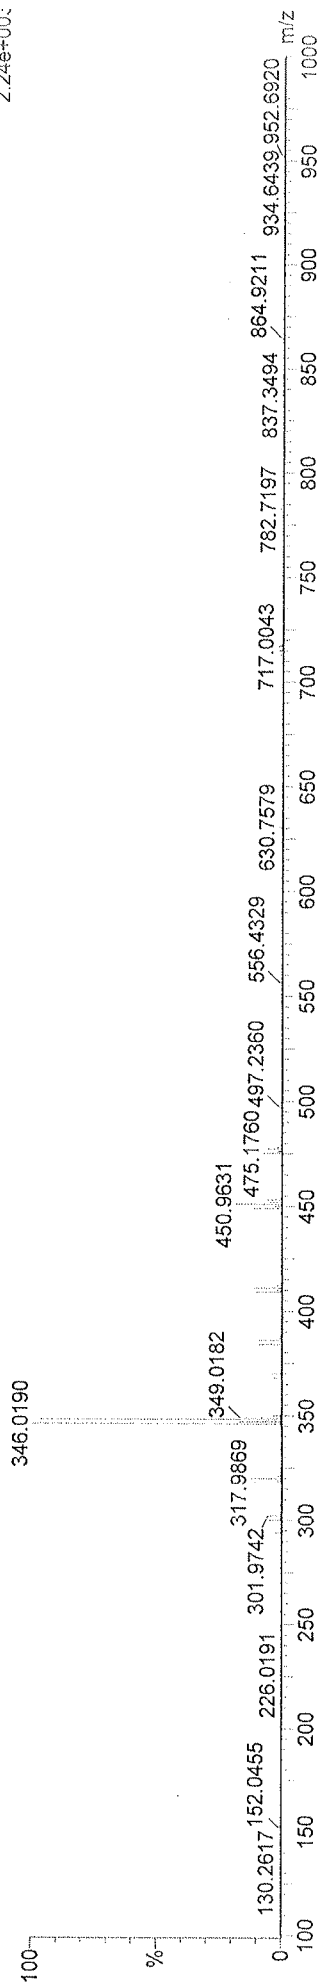

Minimum: -1.0  
 Maximum: 80.0

| Mass     | Calc. Mass | mDa  | PPM  | DBE  | i-FIT | Formula          |
|----------|------------|------|------|------|-------|------------------|
| 346.0190 | 346.0191   | -0.1 | -0.3 | 10.5 | 0.7   | C15 H13 N3 O2 Br |

### Elemental Composition Report

#### Single Mass Analysis

Tolerance = 5.0 PPM / DBE: min = -1.0, max = 80.0  
 Element prediction: Off  
 Number of isotope peaks used for i-FIT = 2

Monoisotopic Mass, Even Electron Ions  
 207 formula(e) evaluated with 2 results within limits (up to 4 closest results for each mass)  
 Elements Used:

C: 0-25 H: 0-30 N: 0-5 O: 0-6 Br: 0-1

MPPC-1

UT0910\_103.21 (0.489) Cm (21:25-58:68)

1: TOF MS ES+  
 3.21e+003

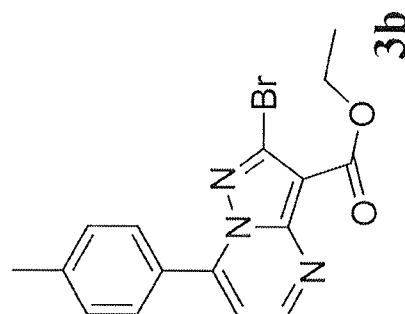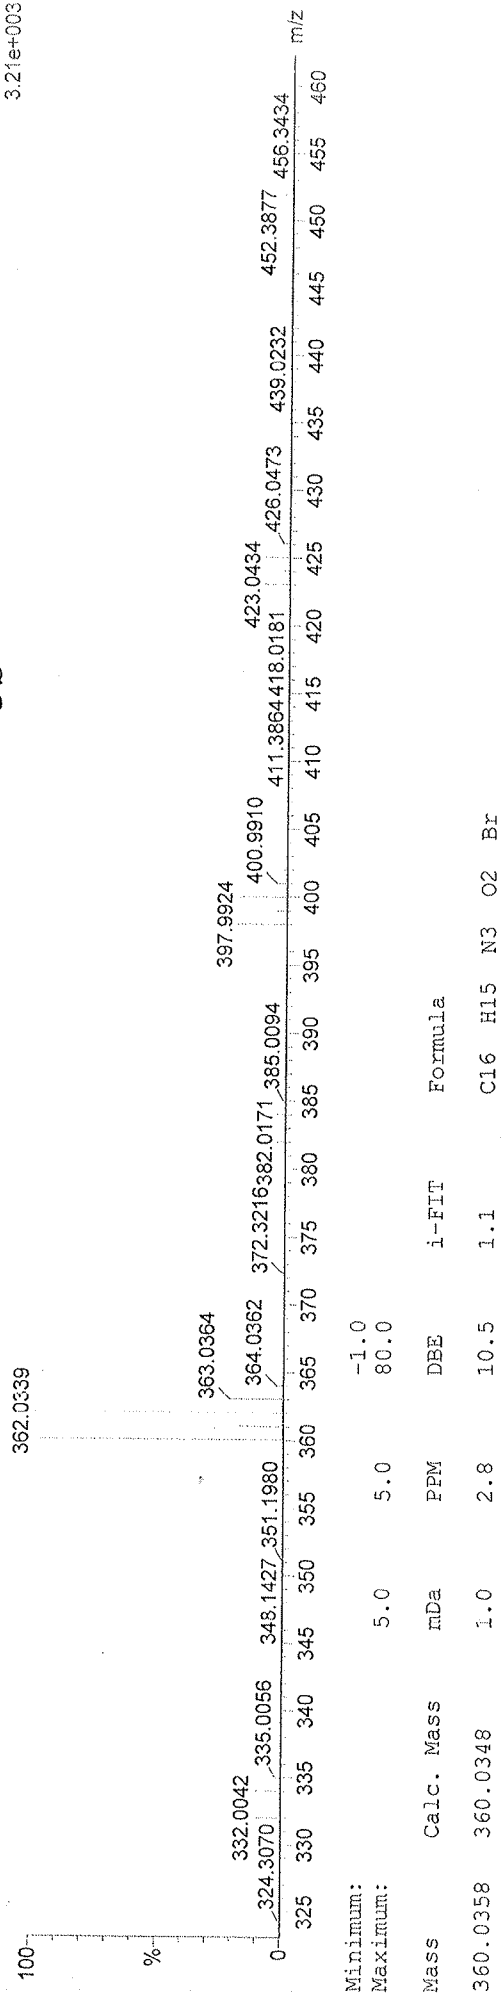

Minimum:  
 Maximum:

-1.0  
 80.0

| Mass     | Calc. Mass | mDa | PPM | DBE  | i-FIT | Formula          |
|----------|------------|-----|-----|------|-------|------------------|
| 360.0358 | 360.0348   | 1.0 | 2.8 | 10.5 | 1.1   | C16 H15 N3 O2 Br |



612110

**Elemental Composition Report**

**Single Mass Analysis**

Tolerance = 5.0 PPM / DBE: min = -1.0, max = 80.0  
 Element prediction: Off  
 Number of isotope peaks used for i-FIT = 3

Monoisotopic Mass, Even Electron Ions  
 426 formula(e) evaluated with 2 results within limits (up to 4 best isotopic matches for each mass)  
 Elements Used:

C: 0-40 H: 0-55 N: 0-6 O: 0-6 Br: 0-1

BPPC-1C TDC-113

UT1210\_105 13 (0.421) Cm (13:16-53:57)

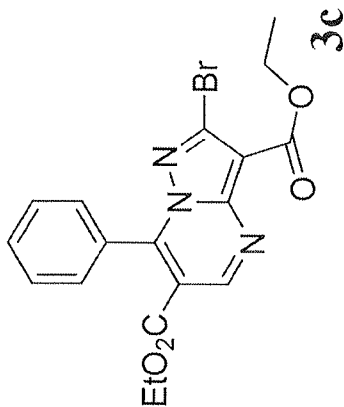

1: TOF MS ES+  
 8.09e+003

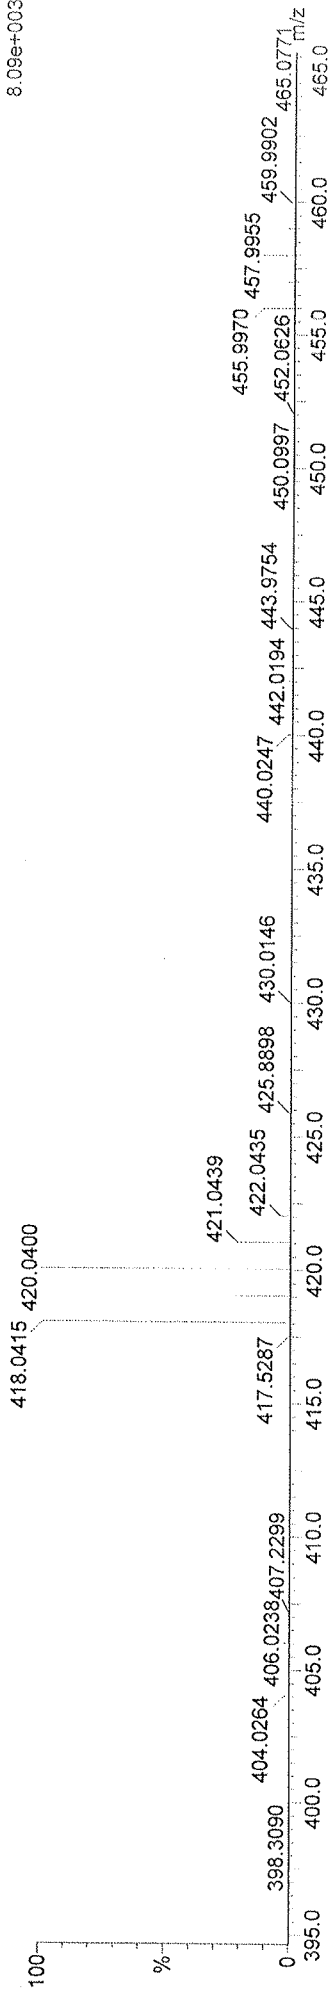

Minimum: -1.0  
 Maximum: 80.0

| Mass     | Calc. Mass | mDa | PPM | i-FIT | Formula          |
|----------|------------|-----|-----|-------|------------------|
| 418.0415 | 418.0402   | 1.3 | 3.1 | 11.5  | C18 H17 N3 O4 Br |
|          |            |     |     | 1.5   | C18 H17 N3 O4 Br |

## Elemental Composition Report

### Single Mass Analysis

Tolerance = 5.0 PPM / DBE: min = -1.0, max = 80.0  
 Element prediction: Off  
 Number of isotope peaks used for i-FIT = 3

Monoisotopic Mass, Even Electron Ions  
 89 formula(e) evaluated with 1 results within limits (up to 4 best isotopic matches for each mass)  
 Elements Used:

C: 0-30 H: 0-35 N: 0-5 O: 0-4  
 BPPC2001  
 UT1010\_259 17 (0.399) Cm (17:21-67:72)

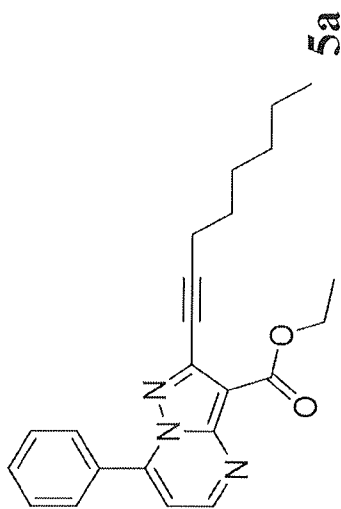

1: TOF MS ES+  
 1.35e+00:

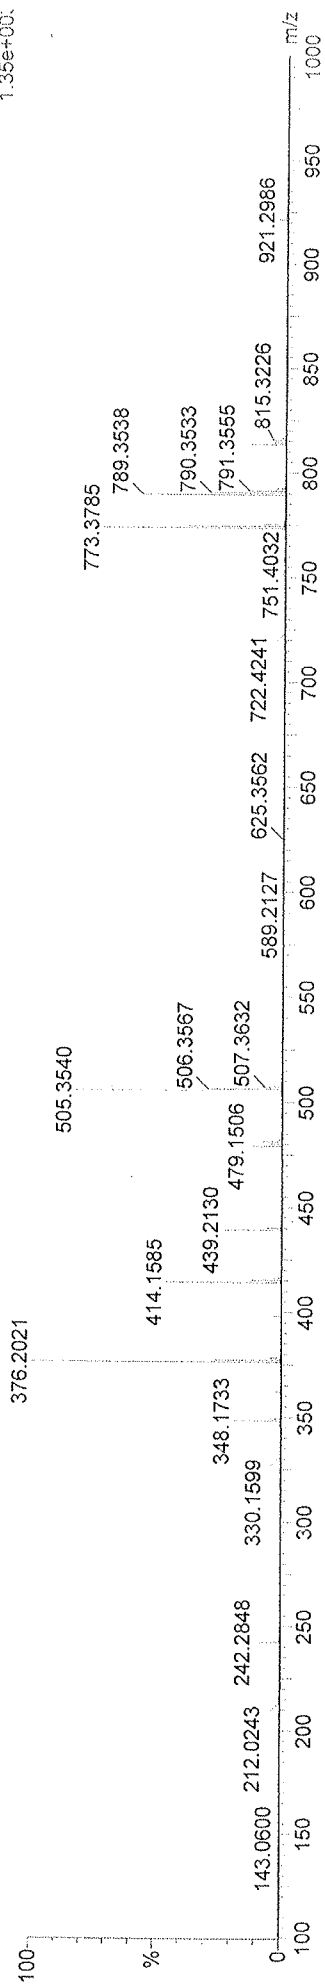

Minimum: -1.0  
 Maximum: 80.0

| Mass     | Calc. Mass | mDa  | PPM  | DBE  | i-FIT | Formula       |
|----------|------------|------|------|------|-------|---------------|
| 376.2021 | 376.2025   | -0.4 | -1.1 | 12.5 | 0.3   | C23 H26 N3 O2 |

Elemental Composition Report

Single Mass Analysis

Tolerance = 5.0 PPM / DBE: min = -1.0, max = 80.0

Element prediction: Off

Number of isotope peaks used for i-FIT = 3

Monoisotopic Mass, Even Electron Ions

90 formula(e) evaluated with 1 results within limits (up to 4 best isotopic matches for each mass)

Elements Used:

C: 0-30 H: 0-35 N: 0-5 O: 0-4

BPPC21006

UT1010\_254 20 (0.450) Cm (20:24-65:78)

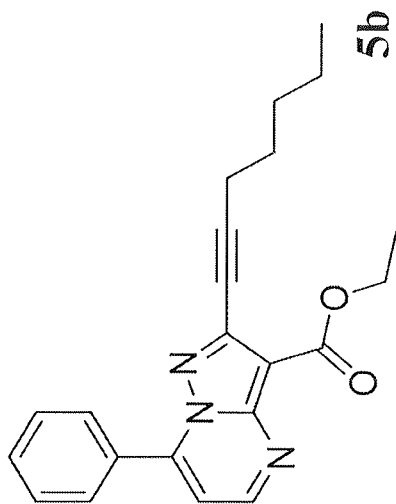

1: TOF MS  
1.47e

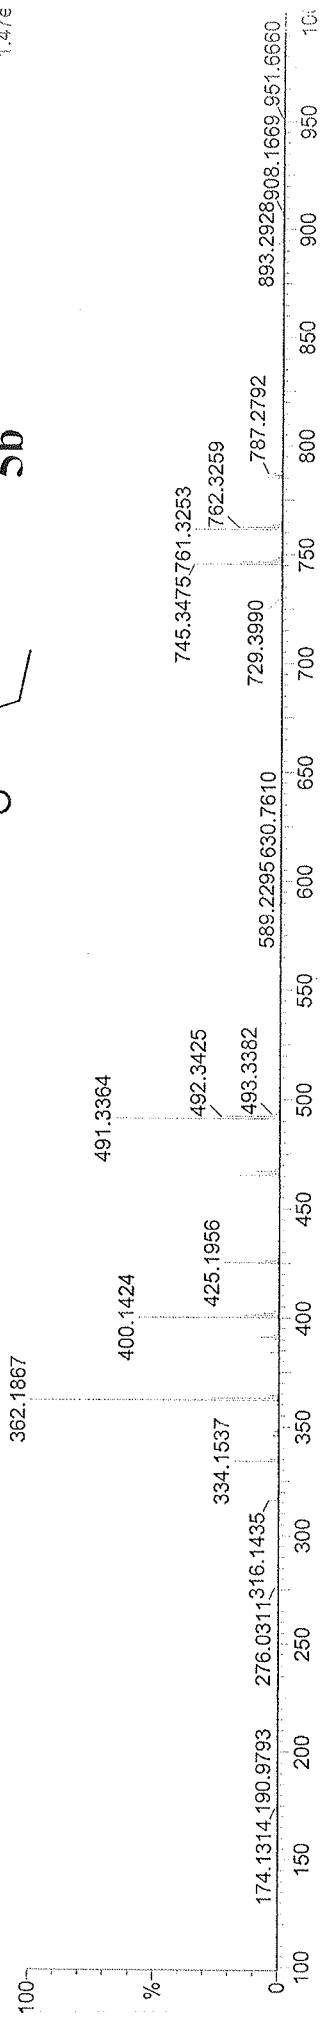

| Mass     | Calc. Mass | mDa  | PPM  | DBE  | i-FIT | Formula       |
|----------|------------|------|------|------|-------|---------------|
| 362.1867 | 362.1869   | -0.2 | -0.6 | 12.5 | 0.3   | C22 H24 N3 O2 |
| Minimum: |            |      | 5.0  | -1.0 |       |               |
| Maximum: |            |      | 5.0  | 80.0 |       |               |

Elemental Composition Report

Single Mass Analysis

Tolerance = 5.0 PPM / DBE: min = -1.0, max = 80.0  
 Element prediction: Off  
 Number of isotope peaks used for i-FIT = 3

Monoisotopic Mass, Even Electron Ions  
 90 formula(e) evaluated with 1 results within limits (up to 4 best isotopic matches for each mass)  
 Elements Used:  
 C: 0-30 H: 0-35 N: 0-5 O: 0-4  
 BPPC2A002  
 UT1010\_258 17 (0.398) Cm (17:22-65:74)

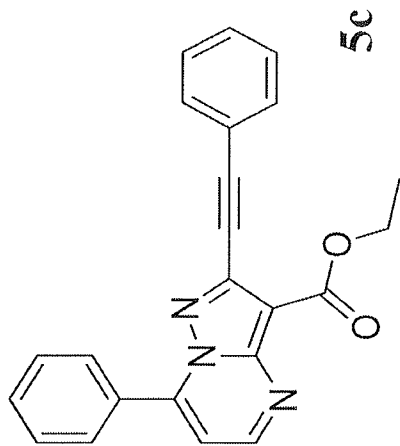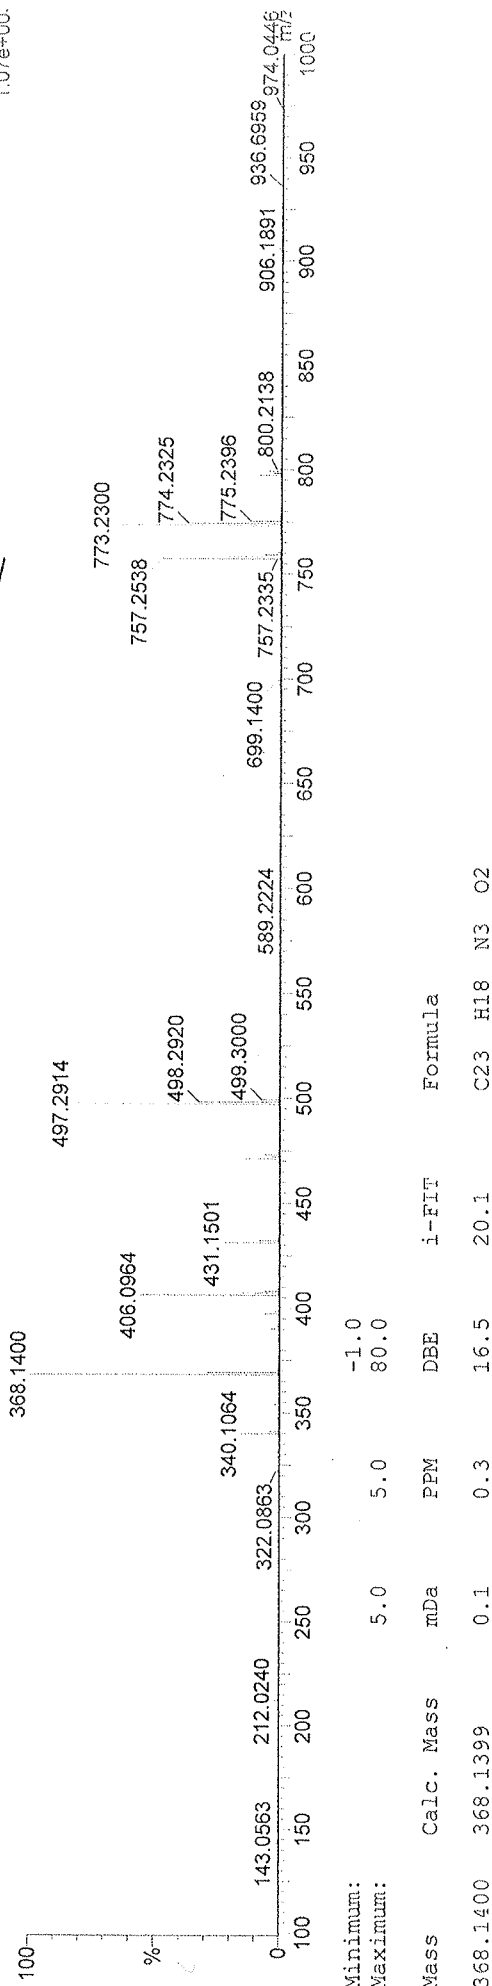

Handwritten notes: *11/10*

Page

**Elemental Composition Report**

**Single Mass Analysis**

Tolerance = 5.0 PPM / DBE: min = -1.0, max = 80.0  
 Element prediction: Off  
 Number of isotope peaks used for i-FIT = 3

Monoisotopic Mass, Even Electron Ions  
 59 formula(e) evaluated with 1 results within limits (up to 4 best isotopic matches for each mass)

Elements Used:

C: 0-30 H: 0-35 N: 0-5 O: 0-4

BPPC2007

UT1010\_253 17 (0.399) Cm (17:23-61:70)

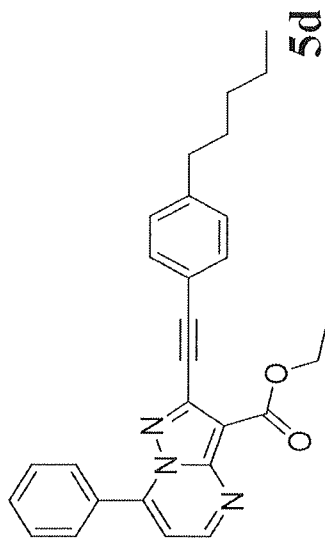

1: TOF MS  
 1.09e

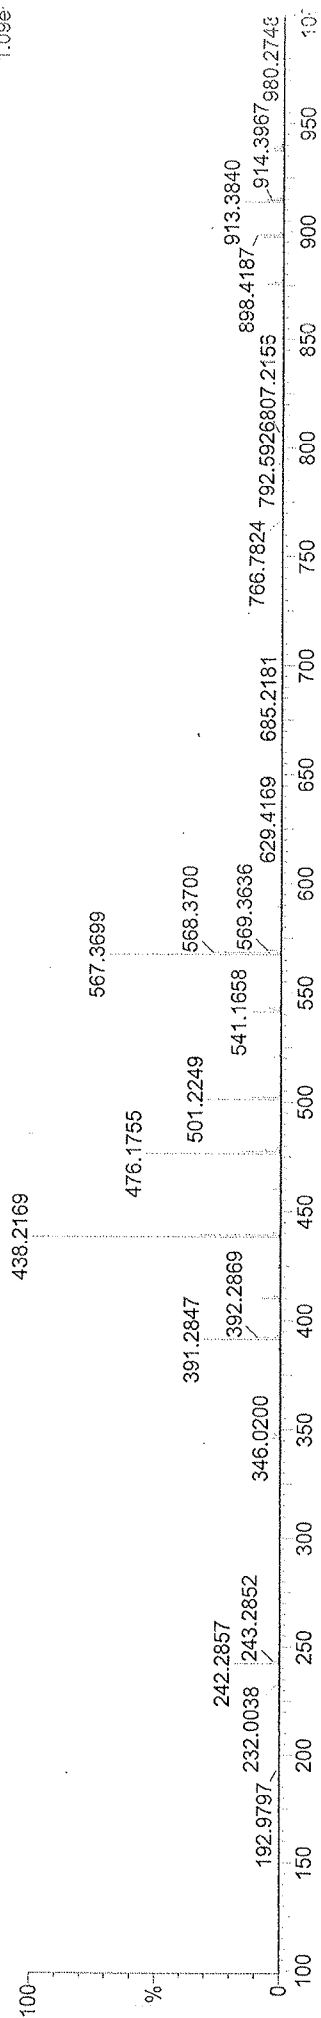

Minimum: -1.0  
 Maximum: 80.0

| Mass     | Calc. Mass | PPM  | DBE  | i-FIT | Formula       |
|----------|------------|------|------|-------|---------------|
| 438.2169 | 438.2182   | -3.0 | 16.5 | 17.4  | C28 H28 N3 O2 |

Paç

Elemental Composition Report

Single Mass Analysis

Tolerance = 5.0 PPM / DBE: min = -1.0, max = 80.0

Element prediction: Off

Number of isotope peaks used for i-FIT = 3

Monoisotopic Mass, Even Electron Ions

89 formula(e) evaluated with 1 results within limits (up to 4 best isotopic matches for each mass)

Elements Used:

C: 0-30 H: 0-35 N: 0-5 O: 0-4

BPPC21003

UT1010\_257 20 (0.450) Cm (20:24-66:72)

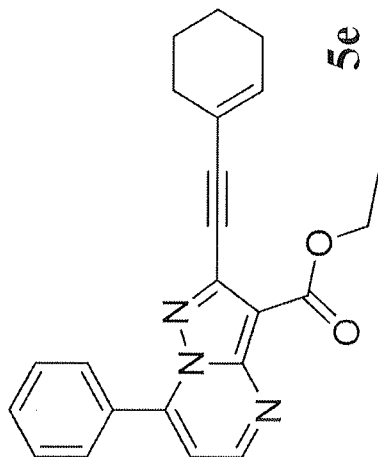

1: TOF MS  
2.57e

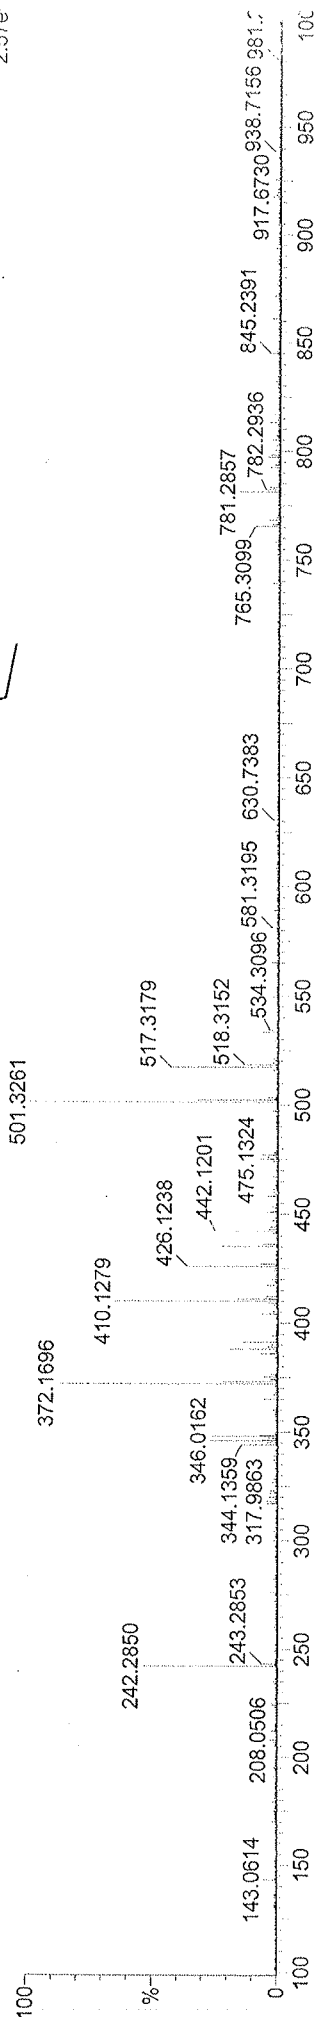

Minimum:  
Maximum:

-1.0  
80.0

| Mass     | Calc. Mass | mDa  | PPM  | DBE  | i-FIT | Formula       |
|----------|------------|------|------|------|-------|---------------|
| 372.1696 | 372.1712   | -1.6 | -4.3 | 14.5 | 1.4   | C23 H22 N3 O2 |

10/11/10  
 Pag

1: TOF MS  
 1.42e

Elemental Composition Report

Single Mass Analysis

Tolerance = 5.0 PPM / DBE: min = -1.0, max = 80.0  
 Element prediction: Off  
 Number of isotope peaks used for i-FIT = 3

Monoisotopic Mass, Even Electron Ions  
 86 formula(e) evaluated with 1 results within limits (up to 4 best isotopic matches for each mass)  
 Elements Used:  
 C: 0-30 H: 0-35 N: 0-5 O: 0-4  
 BPPC2004  
 UT1010\_256 17 (0.399) Cm (17:23-66:74)

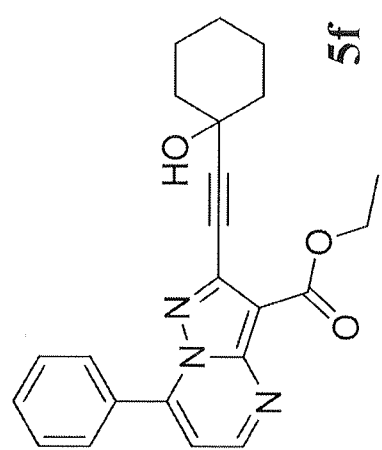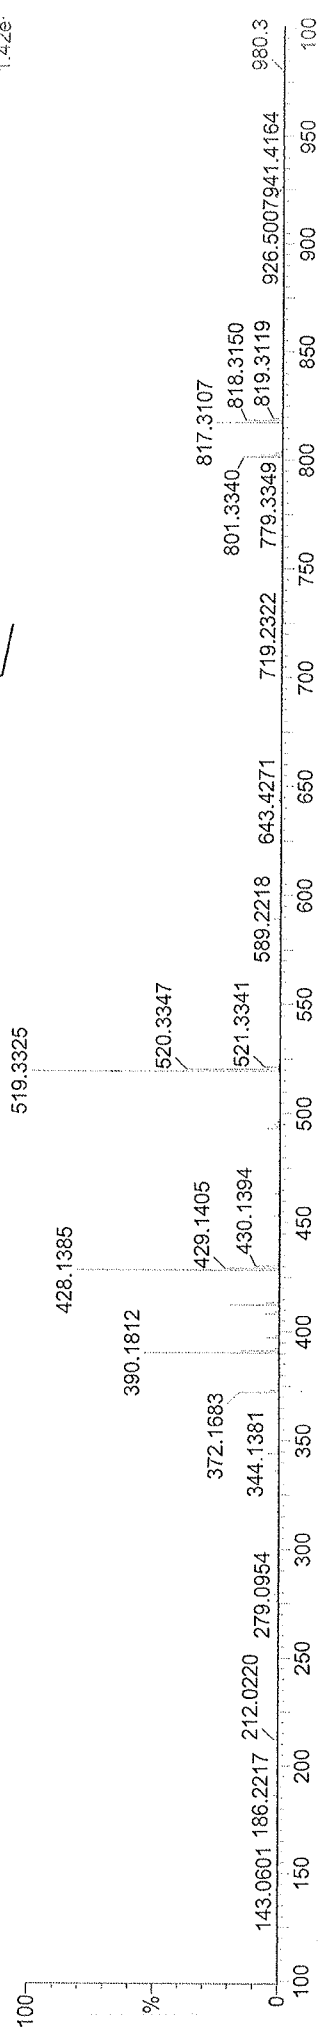

| Mass     | Calc. Mass | mDa  | PPM  | DBE  | i-FIT | Formula       |
|----------|------------|------|------|------|-------|---------------|
| 390.1812 | 390.1818   | -0.6 | -1.5 | 13.5 | 2.2   | C23 H24 N3 O3 |
|          |            |      |      | -1.0 |       |               |
|          |            |      |      | 80.0 |       |               |

Elemental Composition Report

Single Mass Analysis

Tolerance = 5.0 PPM / DBE: min = -1.0, max = 80.0

Element prediction: Off

Number of isotope peaks used for i-FIT = 3

Monoisotopic Mass, Even Electron Ions

90 formula(e) evaluated with 1 results within limits (up to 4 best isotopic matches for each mass)

Elements Used:

C: 0-30 H: 0-35 N: 0-5 O: 0-4

BPPC21005

UT1010\_255 18 (0.416) Cm (18:22-68:76)

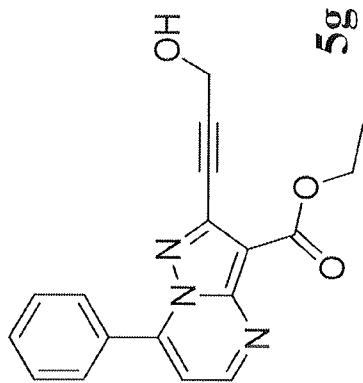

TOF MS  
2.2e4

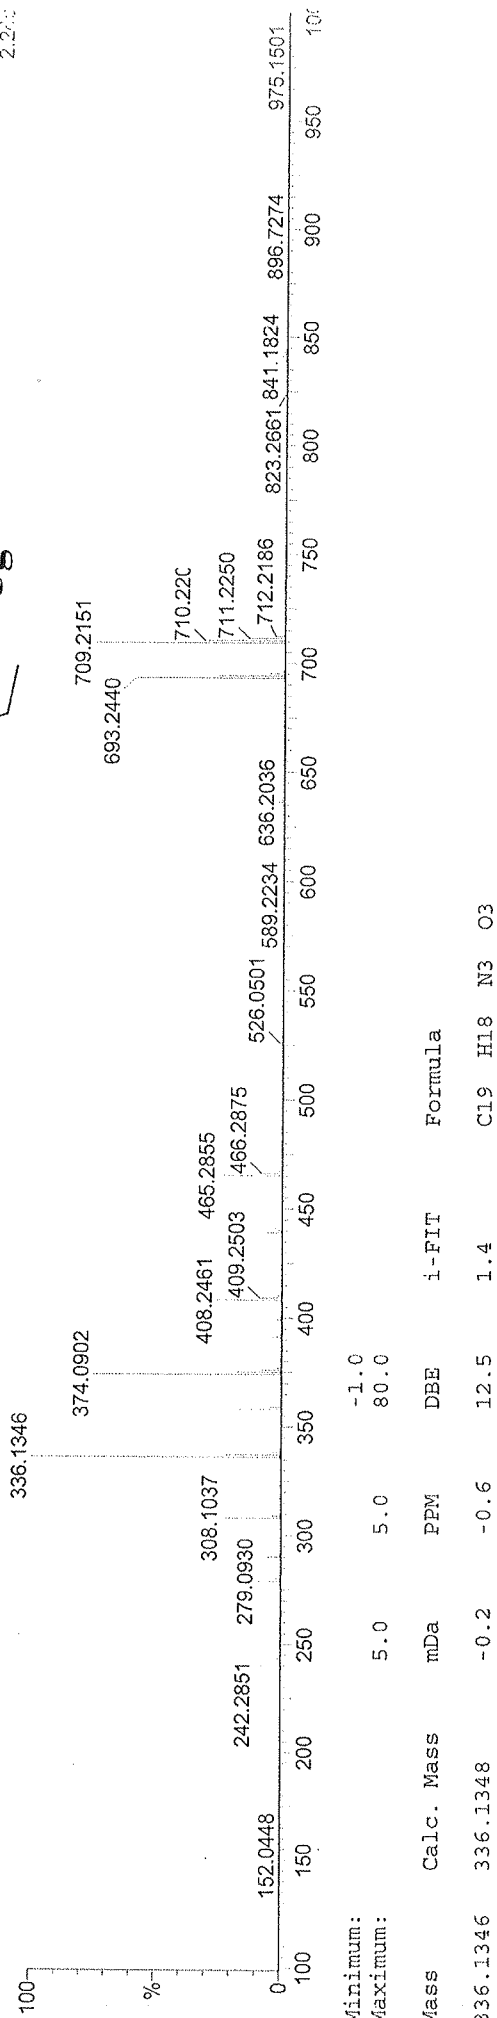

Minimum:  
Maximum:

| Mass     | Calc. Mass | mDa  | PPM  | DBE  | i-FIT | Formula       |
|----------|------------|------|------|------|-------|---------------|
| 336.1346 | 336.1348   | -0.2 | -0.6 | 12.5 | 1.4   | C19 H18 N3 O3 |



31/11/10  
 Page 1

### Elemental Composition Report

#### Single Mass Analysis

Tolerance = 5.0 PPM / DBE: min = -1.0, max = 80.0  
 Element prediction: Off  
 Number of isotope peaks used for i-FIT = 3

Monoisotopic Mass, Even Electron Ions  
 89 formula(e) evaluated with 1 results within limits (up to 4 best isotopic matches for each mass)  
 Elements Used:  
 C: 0-30 H: 0-35 N: 0-5 O: 0-4  
 MPPC21001  
 UT1010\_259 17 (0.399) Cm (17.21-67.72)

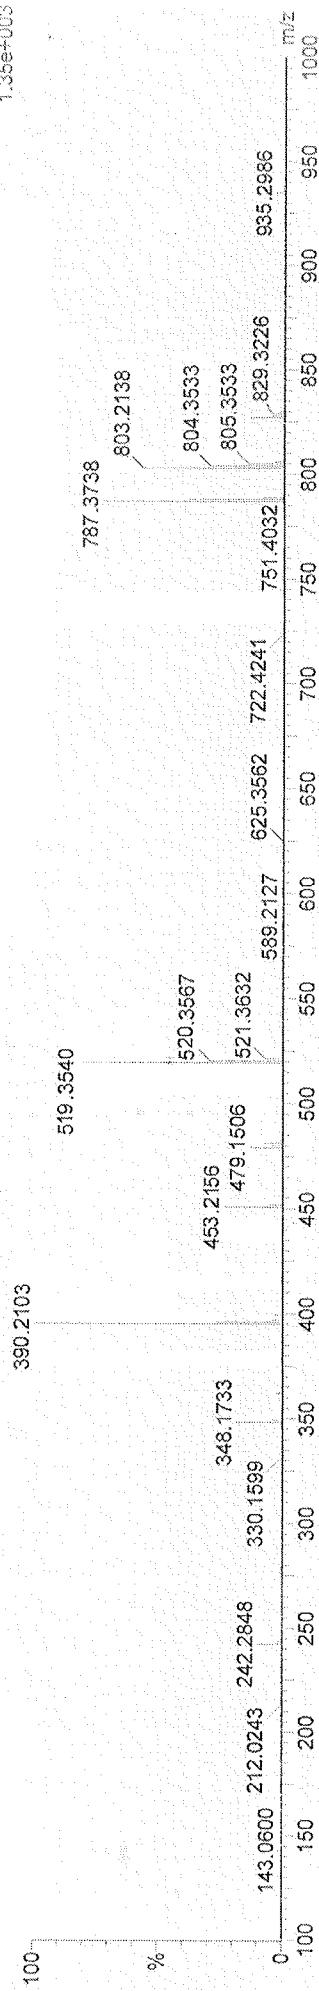

Minimum: -1.0  
 Maximum: 80.0

| Mass     | Calc. Mass | mDa  | PPM  | DBE  | i-FIT | Formula       |
|----------|------------|------|------|------|-------|---------------|
| 390.2103 | 390.2102   | -0.4 | -1.1 | 12.5 | 0.3   | C24 H28 N3 O2 |

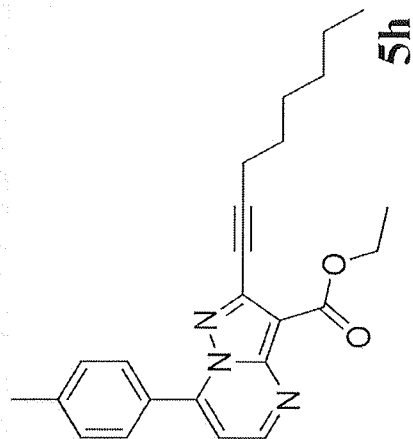

1: TOF MS ES+  
 1.35e+003

Elemental Composition Report

Single Mass Analysis

Tolerance = 10.0 PPM / DBE: min = -1.0, max = 80.0  
 Element prediction: Off  
 Number of isotope peaks used for i-FIT = 3

Monoisotopic Mass, Even Electron Ions  
 178 formula(e) evaluated with 2 results within limits (up to 4 best isotopic matches for each mass)

Elements Used:  
 C: 0-30 H: 0-35 N: 0-5 O: 0-4 I: 0-1

MPPC2\002  
 UT1010\_251 21 (0.489) Cm (21:28-61:72)

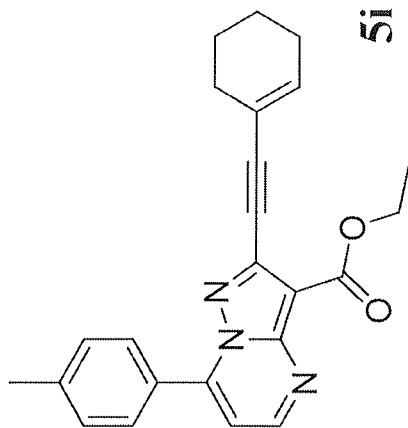

5i

1: TOF MS  
 7.63e

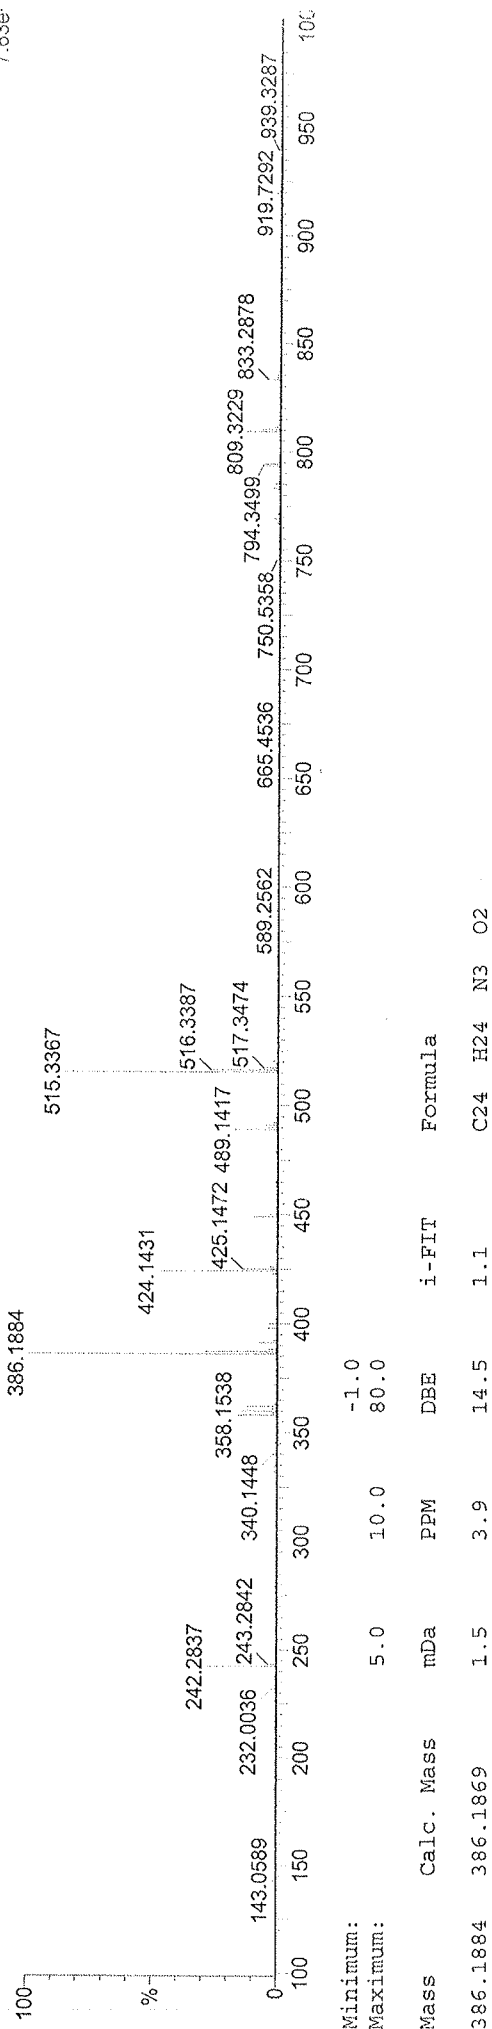

Minimum:  
 Maximum:

| Mass     | Calc. Mass | mDa | PPM | DBE  | i-FIT | Formula       |
|----------|------------|-----|-----|------|-------|---------------|
| 386.1884 | 386.1869   | 1.5 | 3.9 | 14.5 | 1.1   | C24 H24 N3 O2 |

ES 1110

Page

Elemental Composition Report

Single Mass Analysis

Tolerance = 10.0 PPM / DBE: min = -1.0, max = 80.0  
 Element prediction: Off  
 Number of isotope peaks used for i-FIT = 3

Monoisotopic Mass, Even Electron Ions  
 179 formula(e) evaluated with 1 results within limits (up to 4 best isotopic matches for each mass)

Elements Used:  
 C: 0-30 H: 0-35 N: 0-5 O: 0-4 I: 0-1

BPPC2C001  
 UT1010\_250 17 (0.398) Cm (17:20-62:71)

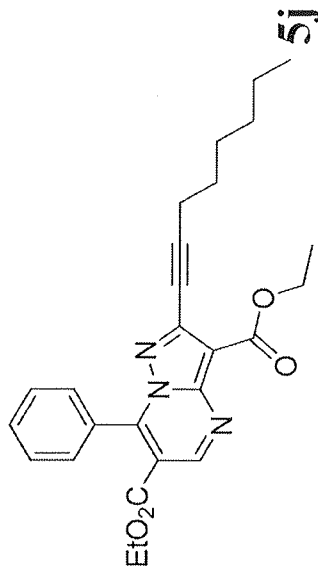

1: TOF MS  
 6.82s

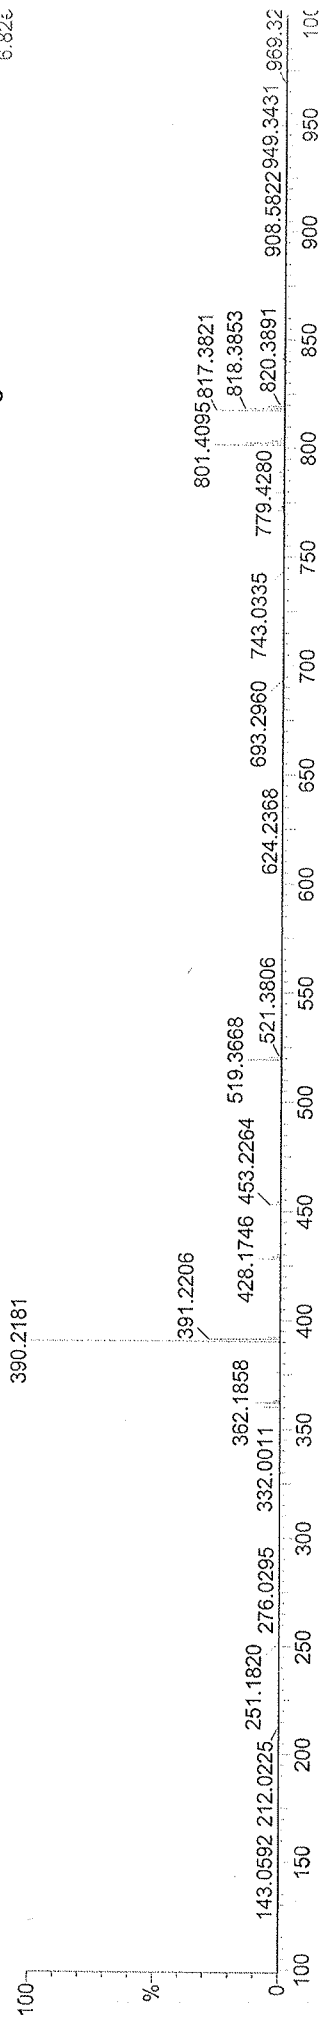

| Mass     | Calc. Mass | mDa  | PPM  | DBE  | i-FIT | Formula       |
|----------|------------|------|------|------|-------|---------------|
| 390.2181 | 390.2182   | -0.1 | -0.3 | 12.5 | 1.8   | C24 H28 N3 O2 |
|          |            |      |      | -1.0 |       |               |
|          |            |      |      | 80.0 |       |               |

3/11/10

Paç

Elemental Composition Report

Single Mass Analysis

Tolerance = 5.0 PPM / DBE: min = -1.0, max = 80.0

Element prediction: Off

Number of isotope peaks used for i-FIT = 2

Monoisotopic Mass, Even Electron Ions

138 formula(e) evaluated with 1 results within limits (up to 4 closest results for each mass)

Elements Used:

C: 0-25 H: 0-30 N: 0-5 O: 0-6 I: 0-1

BPPC3-001

UT0910\_A1 31 (0.705) Cm (29:34-68:76)

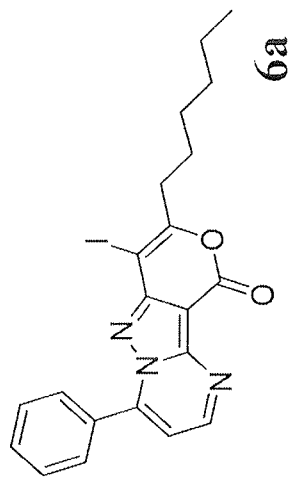

1: TOF MS ES+  
5.50e+00:

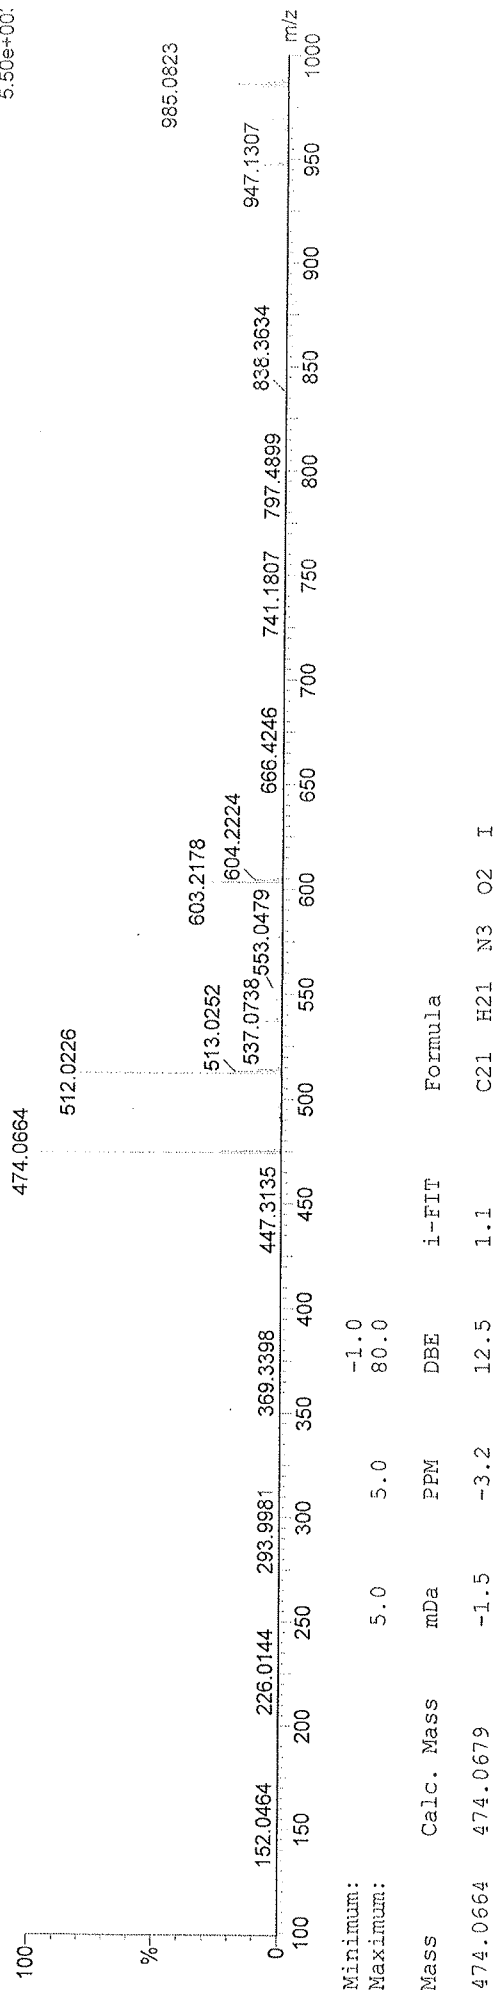

Minimum:

Maximum:

Mass

Calc. Mass

mDa

PPM

DBE

i-FIT

Formula

### Elemental Composition Report

#### Single Mass Analysis

Tolerance = 5.0 PPM / DBE: min = -1.0, max = 80.0  
 Element prediction: Off  
 Number of isotope peaks used for i-FIT = 2

Monoisotopic Mass, Even Electron Ions  
 175 formula(e) evaluated with 1 results within limits (up to 4 closest results for each mass)

Elements Used:

C: 0-30 H: 0-30 N: 0-5 O: 0-6 I: 0-1

BPPC3-006

UT0910\_A3 30 (0.688) Cm (30:34-72:80)

1: TOF MS ES+  
 2.04e+003

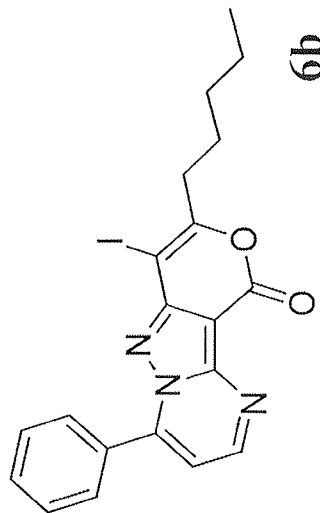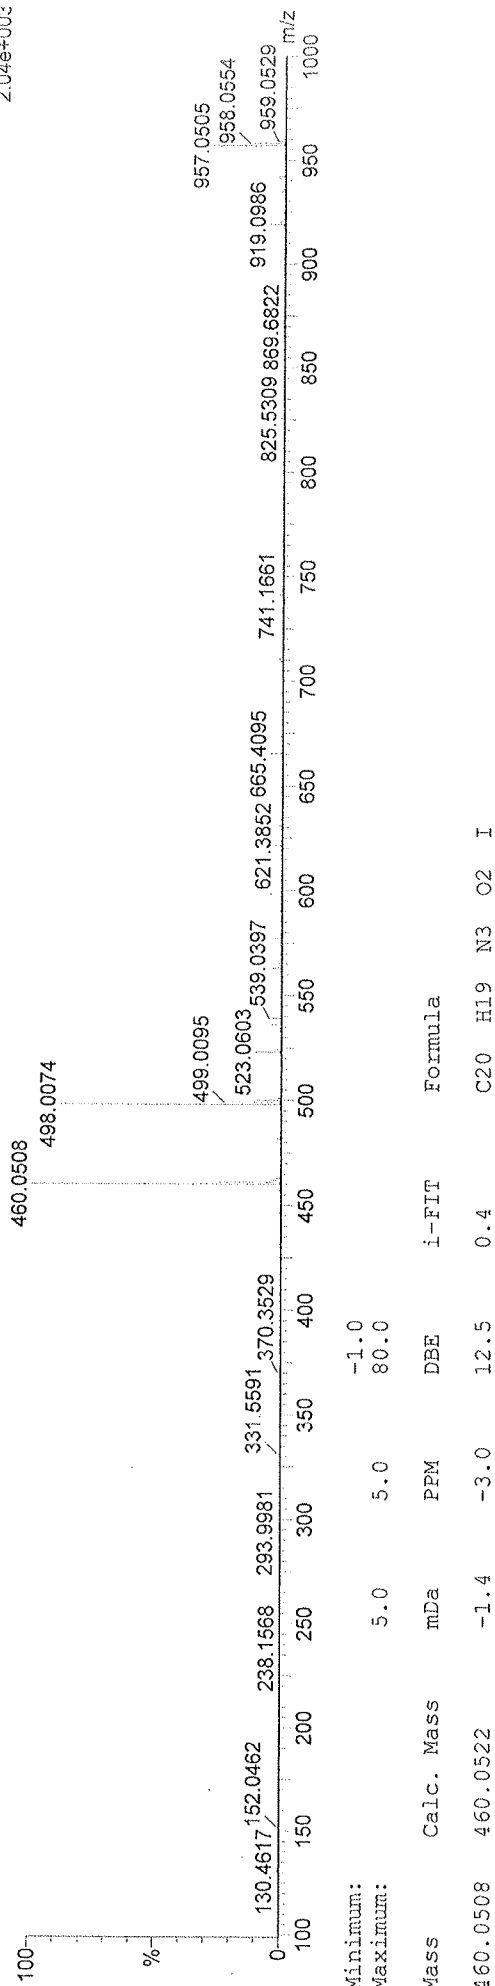

Minimum:

Maximum:

Mass

Calc. Mass

mDa

PPM

DBE

i-FIT

Formula

Elemental Composition Report

Single Mass Analysis

Tolerance = 5.0 PPM / DBE: min = -1.0, max = 80.0  
 Element prediction: Off  
 Number of isotope peaks used for i-FIT = 2

Monoisotopic Mass, Even Electron Ions  
 172 formula(e) evaluated with 1 results within limits (up to 4 closest results for each mass)

Elements Used:

C: 0-30 H: 0-30 N: 0-5 O: 0-6 I: 0-1

BPPC3-002  
 UT0910\_A7 25 (0.580) Cm (25:30-70:78)

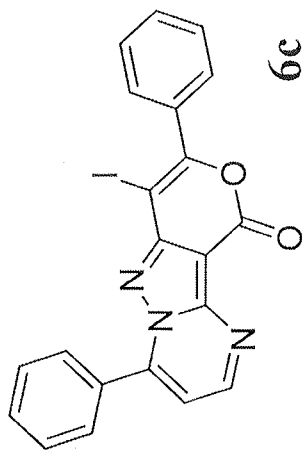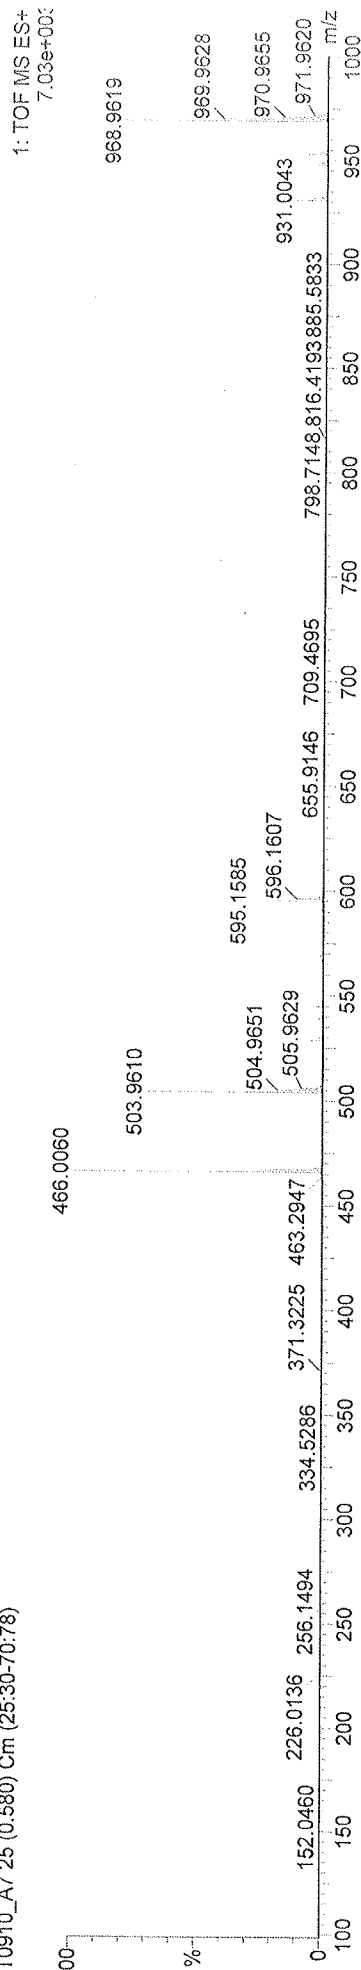

| Mass     | Calc. Mass | mDa | PPM | DBE  | i-FIT | Formula         |
|----------|------------|-----|-----|------|-------|-----------------|
| 466.0060 | 466.0053   | 0.7 | 1.5 | 16.5 | 0.1   | C21 H13 N3 O2 I |
| Minimum: |            |     | 5.0 | -1.0 |       |                 |
| Maximum: |            |     | 5.0 | 80.0 |       |                 |

Elemental Composition Report

Single Mass Analysis

Tolerance = 5.0 PPM / DBE: min = -1.0, max = 80.0

Element prediction: Off

Number of isotope peaks used for i-FIT = 3

Monoisotopic Mass, Even Electron Ions

266 formula(e) evaluated with 2 results within limits (up to 4 best isotopic matches for each mass)

Elements Used:

C: 0-40 H: 0-55 N: 0-4 O: 0-5 I: 0-1

BPPC3-007 TDC-113

UT1210\_103 15 (0.469) Cm (15:20-49:56)

1: TOF MS ES+  
 3.09e+003

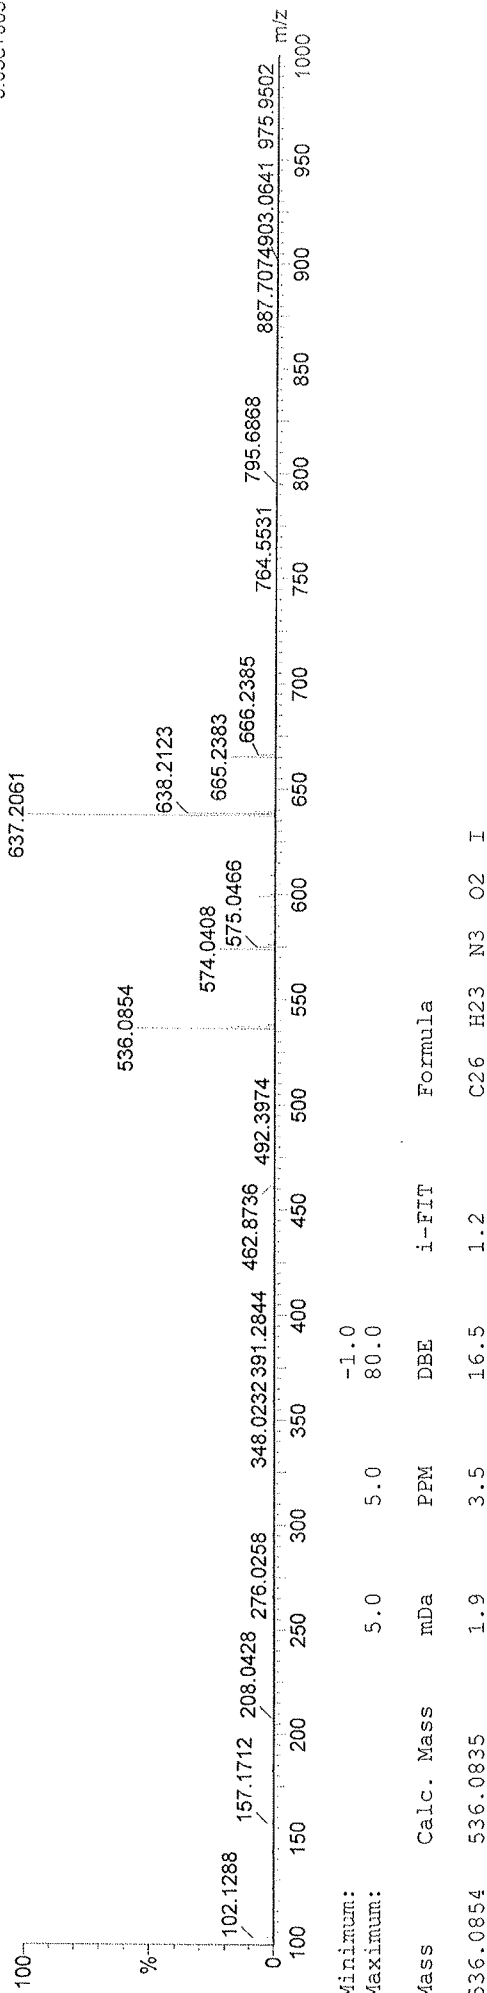

610110

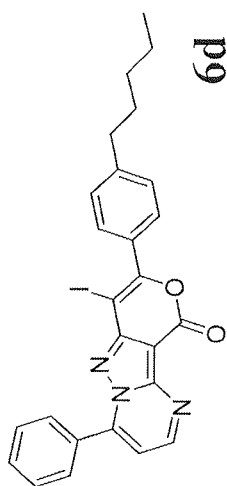

Elemental Composition Report

Single Mass Analysis

Tolerance = 5.0 PPM / DBE: min = -1.0, max = 80.0  
 Element prediction: Off  
 Number of isotope peaks used for i-FIT = 2

Monoisotopic Mass, Even Electron Ions  
 168 formula(e) evaluated with 1 results within limits (up to 4 closest results for each mass)  
 Elements Used:

C: 0-30 H: 0-30 N: 0-5 O: 0-6 I: 0-1

BPPC3-003  
 UT0910\_A4 23 (0.524) Cm (23:28-73:82)

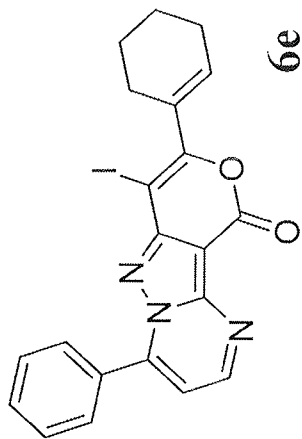

1: TOF MS ES+  
 1.24e+004

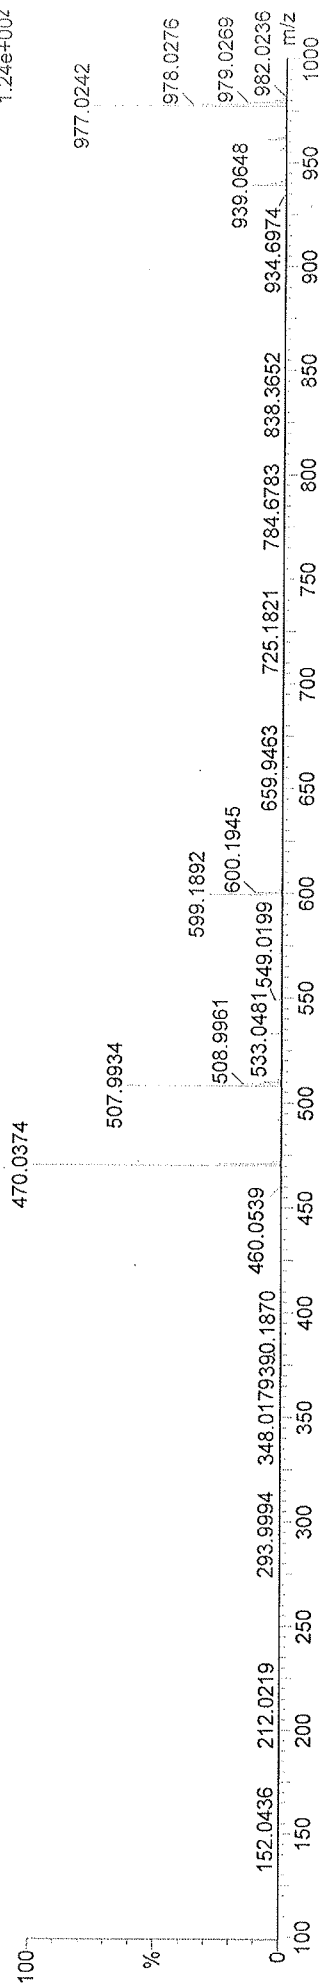

| Mass     | Calc. Mass | mDa | PPM | DBE  | i-FIT | Formula         |
|----------|------------|-----|-----|------|-------|-----------------|
| 470.0374 | 470.0366   | 0.8 | 1.7 | 14.5 | 0.2   | C21 H17 N3 O2 I |
|          |            |     |     | -1.0 |       |                 |
|          |            |     | 5.0 | 80.0 |       |                 |



Elemental Composition Report

Single Mass Analysis

Tolerance = 5.0 PPM / DBE: min = -1.0, max = 80.0

Element prediction: Off

Number of isotope peaks used for i-FIT = 2

Monoisotopic Mass, Even Electron Ions

155 formula(e) evaluated with 1 results within limits (up to 4 closest results for each mass)

Elements Used:

C: 0-30 H: 0-30 N: 0-5 O: 0-6 I: 0-1

MPPC3-001

UT0910\_A5.24 (0.541) Cm (24:29-78:83)

1: TOF MS ES+  
7.76e+003

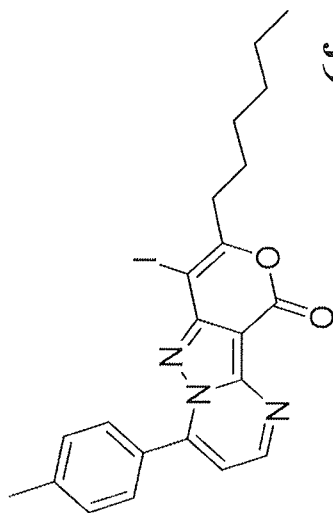

6f

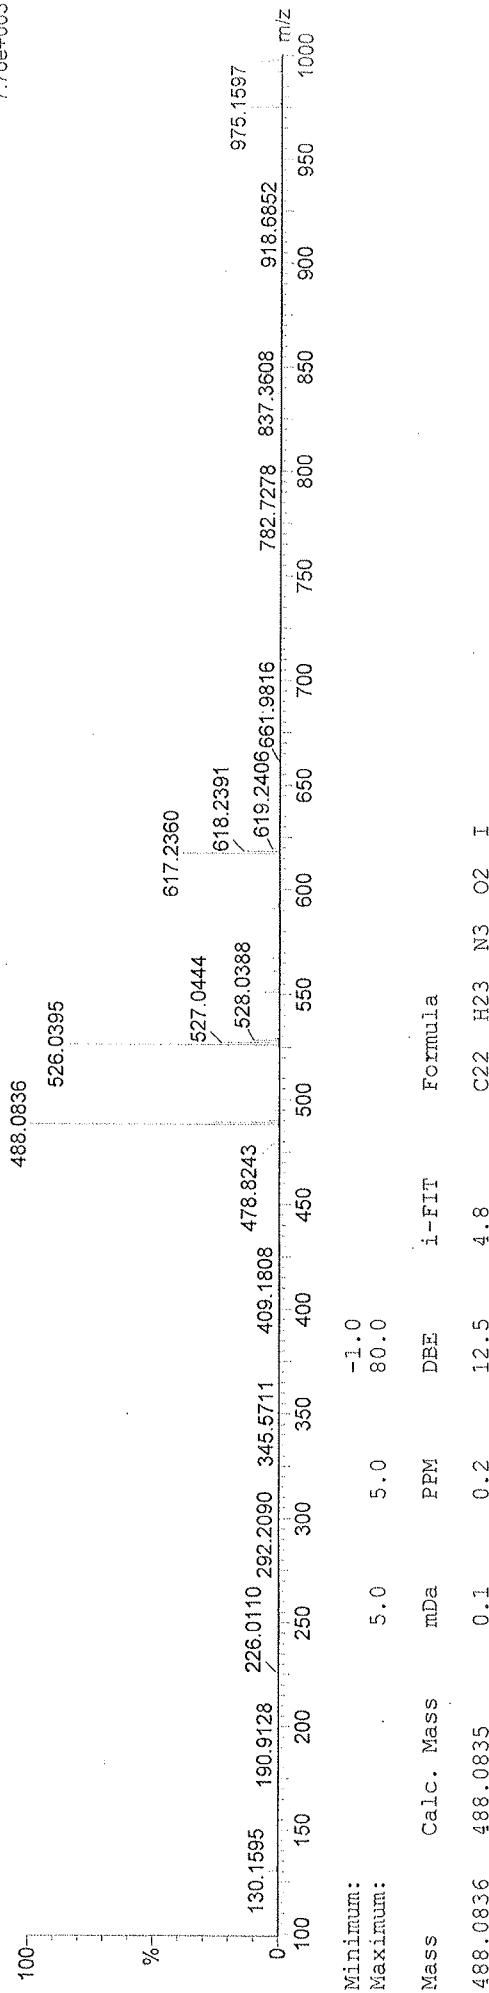

Elemental Composition Report

Single Mass Analysis

Tolerance = 10.0 PPM / DBE: min = -1.0, max = 80.0  
 Element prediction: Off  
 Number of isotope peaks used for i-FIT = 3

Monoisotopic Mass, Even Electron Ions  
 122 formula(e) evaluated with 2 results within limits (up to 4 best isotopic matches for each mass)  
 Elements Used:

C: 0-30 H: 0-35 N: 0-5 O: 0-4 I: 0-1

MPPC31002

UT1010\_249 25 (0.580) Cm (25:28-69:80)

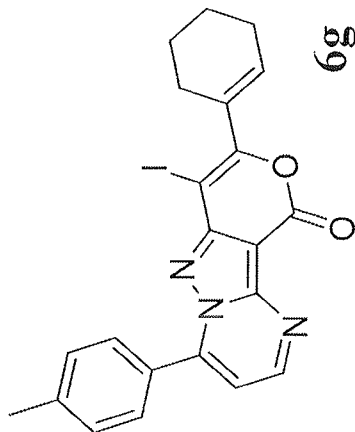

1: TOF MS  
 3.38e

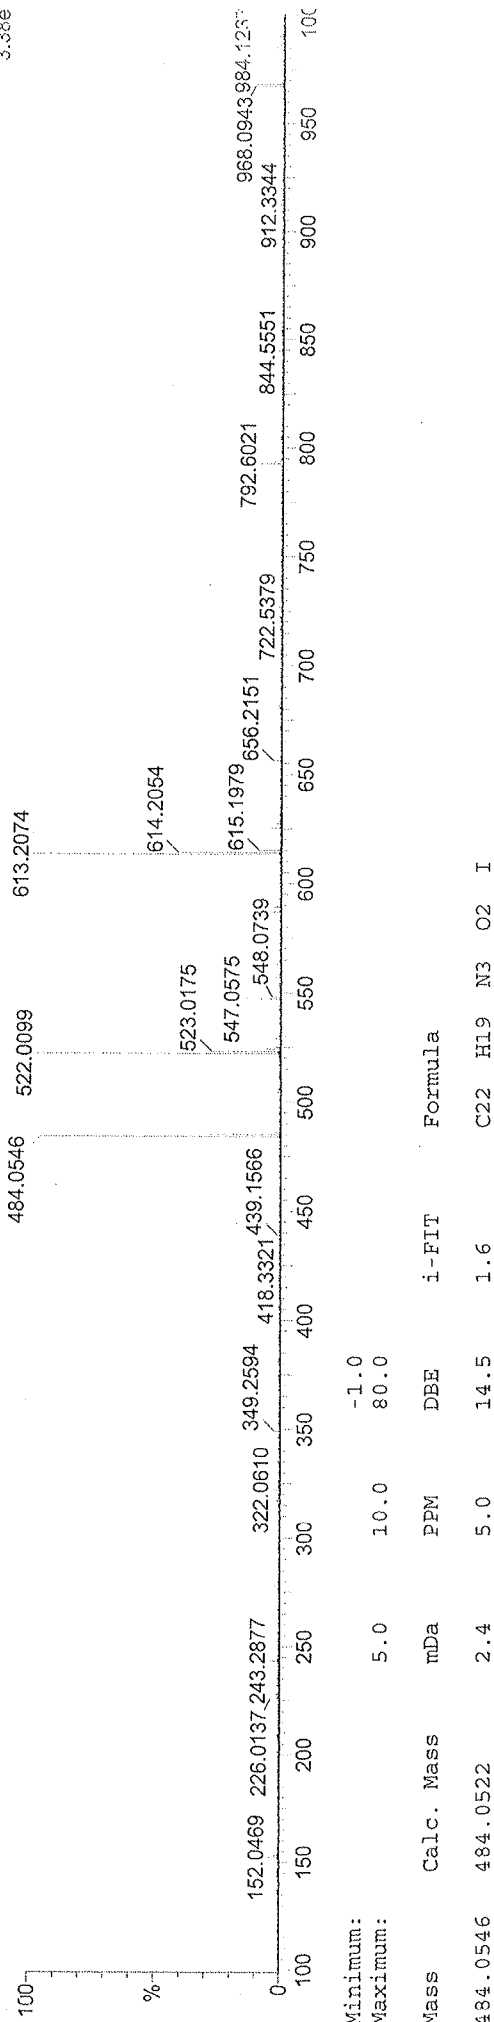

Minimum:  
 Maximum:

5.0 10.0 -1.0 80.0

Mass Calc. Mass mDa DBE i-FIT Formula

484.0546 484.0522 2.4 14.5 1.6 C22 H19 N3 O2 I

3/11/10  
 Paz

Elemental Composition Report

Single Mass Analysis

Tolerance = 5.0 PPM / DBE: min = -1.0, max = 80.0

Element prediction: Off

Number of isotope peaks used for i-FIT = 2

Monoisotopic Mass, Even Electron Ions

128 formula(e) evaluated with 1 results within limits (up to 4 closest results for each mass)

Elements Used:

C: 0-30 H: 0-30 N: 0-5 O: 0-6 I: 0-1

BPPC3C-001

UT0910\_A6 28 (0.632) Cm (27:36-69:80)

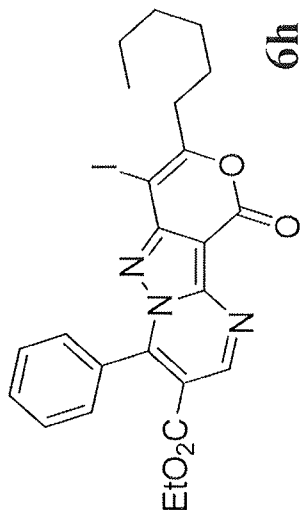

1: TOF MS ES+  
1.01e+004

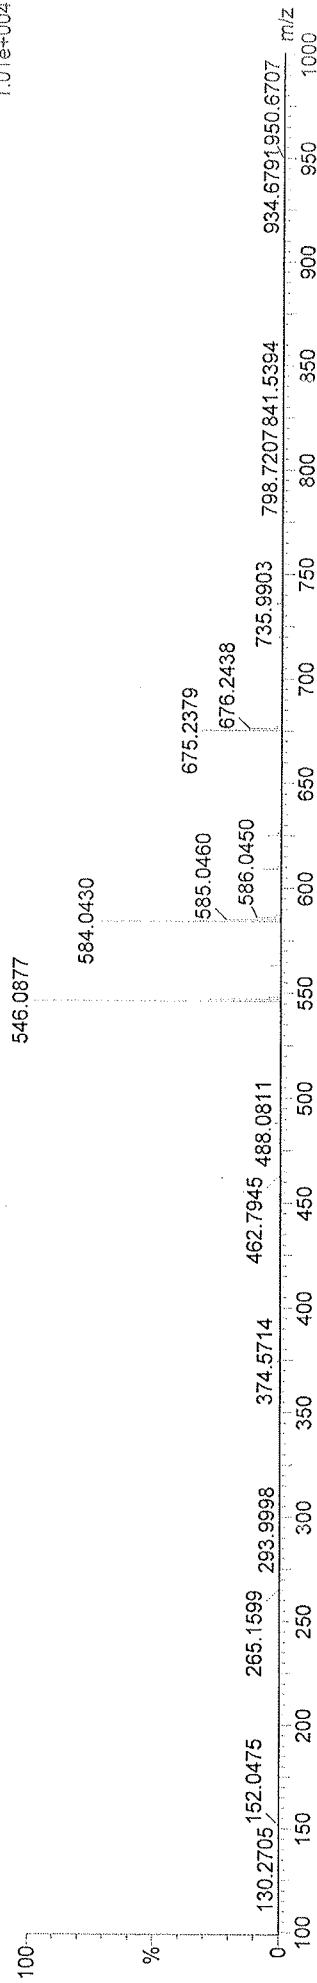

Minimum: -1.0  
Maximum: 80.0

| Mass     | Calc. Mass | mDa  | PPM  | DBE  | i-FIT | Formula         |
|----------|------------|------|------|------|-------|-----------------|
| 546.0877 | 546.0890   | -1.3 | -2.4 | 13.5 | 0.6   | C24 H25 N3 O4 I |

Elemental Composition Report

Single Mass Analysis

Tolerance = 5.0 PPM / DBE: min = -1.0, max = 80.0  
 Element prediction: Off  
 Number of isotope peaks used for i-FIT = 3

Monoisotopic Mass, Even Electron Ions  
 185 formula(e) evaluated with 1 results within limits (up to 4 best isotopic matches for each mass)  
 Elements Used:

C: 0-35 H: 0-45 N: 0-6 O: 0-6  
 BPPC4-SOG-001  
 UT1010\_270 14 (0.325) Cm (14:25-57:68)

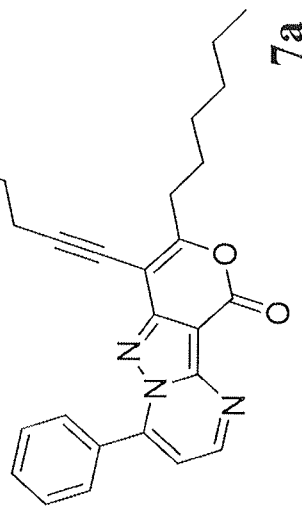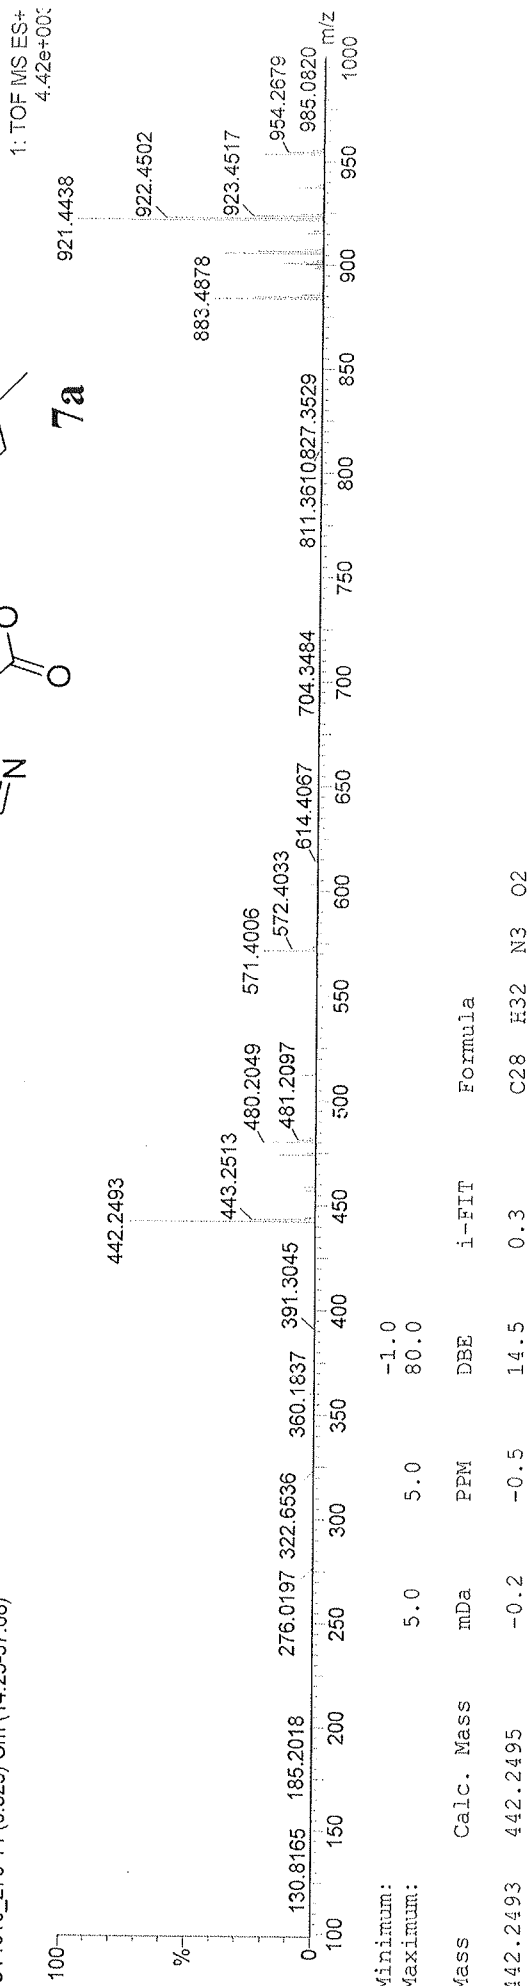

Minimum: -1.0  
 Maximum: 80.0

| Mass     | Calc. Mass | mDa  | PPM  | DBE  | i-FIT | Formula       |
|----------|------------|------|------|------|-------|---------------|
| 442.2493 | 442.2495   | -0.2 | -0.5 | 14.5 | 0.3   | C28 H32 N3 O2 |

Elemental Composition Report

Single Mass Analysis

Tolerance = 5.0 PPM / DBE: min = -1.0, max = 80.0  
 Element prediction: Off  
 Number of isotope peaks used for i-FIT = 3

Monoisotopic Mass, Even Electron Ions  
 186 formula(e) evaluated with 1 results within limits (up to 4 best isotopic matches for each mass)  
 Elements Used:

C: 0-35 H: 0-45 N: 0-6 O: 0-6  
 BPPC4-SOG-002  
 UT1010\_269 18 (0.416) Cm (17:26-57:67)

03/11/10

Page 1

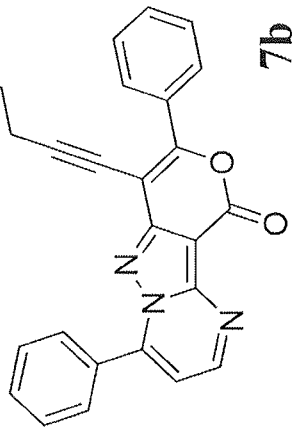

1: TOF MS ES+  
 3.90e+00z

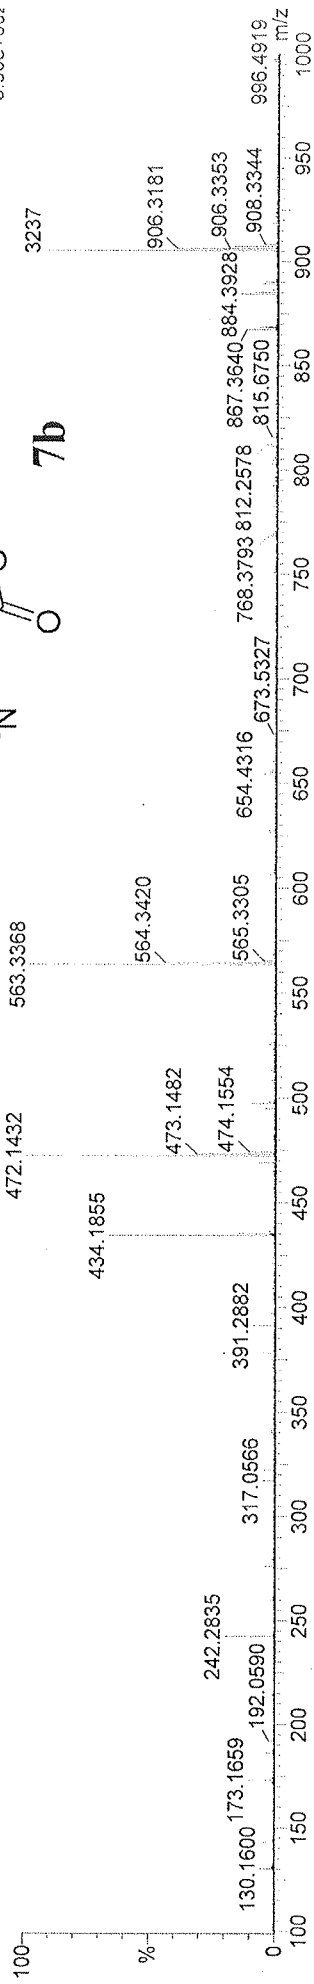

| Mass     | Calc. Mass | mDa  | DBE  | i-FIT | Formula       |
|----------|------------|------|------|-------|---------------|
| 434.1855 | 434.1869   | -1.4 | 18.5 | 5.2   | C28 H24 N3 O2 |
|          |            |      |      |       |               |
| Minimum: |            |      | -1.0 |       |               |
| Maximum: |            |      | 80.0 |       |               |

20111110

Elemental Composition Report

Single Mass Analysis

Tolerance = 5.0 PPM / DBE: min = -1.0, max = 80.0  
 Element prediction: Off  
 Number of isotope peaks used for i-FIT = 3

Monoisotopic Mass, Even Electron Ions  
 185 formula(e) evaluated with 1 results within limits (up to 4 best isotopic matches for each mass)

Elements Used:

C: 0-35 H: 0-45 N: 0-6 O: 0-6  
 BPPC4-SU-001  
 UT1010\_268 14 (0.326) Cm (14:20-54:63)

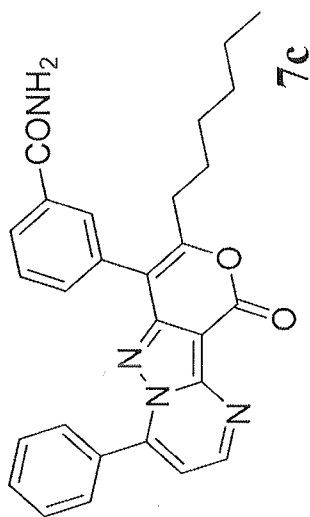

1: TOF MS ES+  
 5.29e+00%

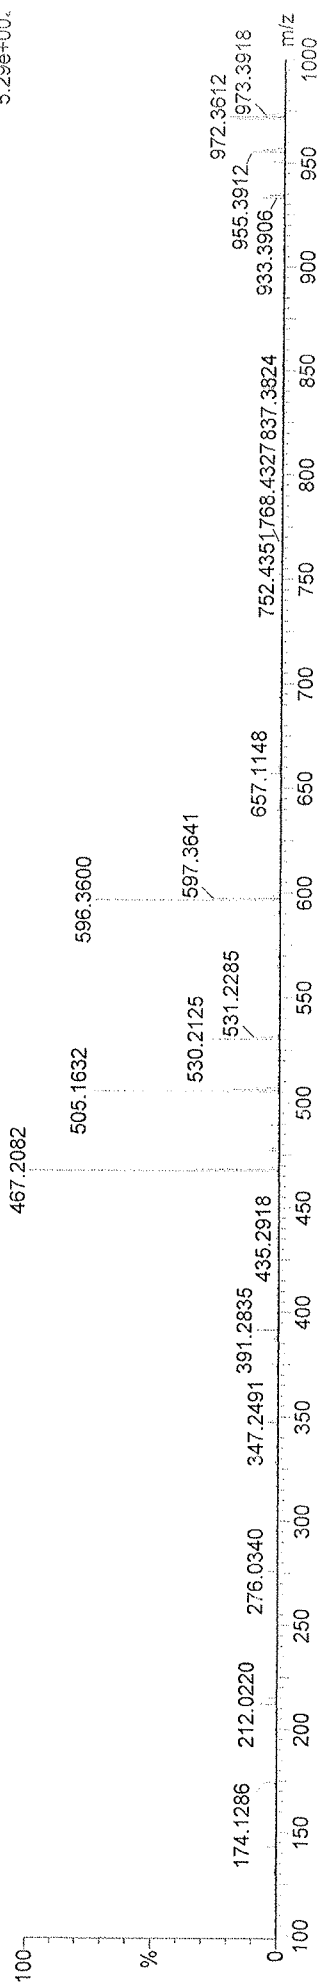

| Mass     | Calc. Mass | mDa  | PPM  | DBE  | i-FIT | Formula       |
|----------|------------|------|------|------|-------|---------------|
| 467.2082 | 467.2083   | -0.1 | -0.2 | 17.5 | 7.9   | C28 H27 N4 O3 |
|          |            |      |      | -1.0 |       |               |
|          |            |      |      | 80.0 |       |               |

Elemental Composition Report

Single Mass Analysis

Tolerance = 5.0 PPM / DBE: min = -1.0, max = 80.0  
 Element prediction: Off  
 Number of isotope peaks used for i-FIT = 3

Monoisotopic Mass, Even Electron Ions  
 188 formula(e) evaluated with 1 results within limits (up to 4 best isotopic matches for each mass)

Elements Used:

C: 0-35 H: 0-45 N: 0-6 O: 0-6

BPPC4-SU-002

UT1010\_267 15 (0.342) Cm (14:19:57:68)

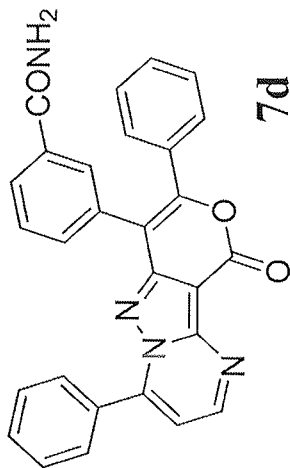

1: TOF MS ES+  
 5.08e+00:

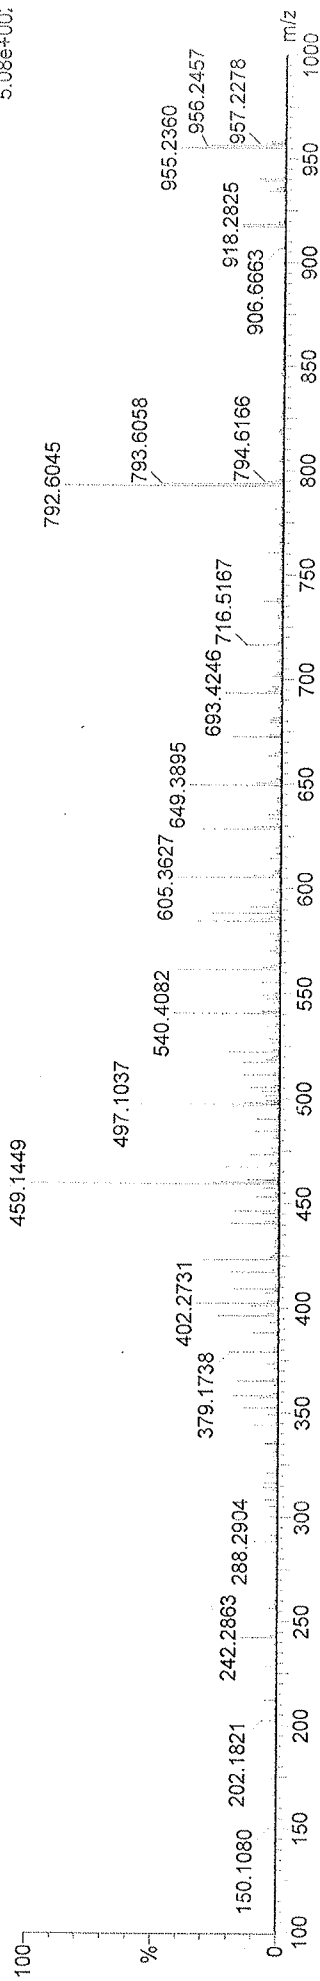

Minimum: -1.0  
 Maximum: 80.0

| Mass     | Calc. Mass | mDa  | PPM  | DBE  | i-FIT | Formula       |
|----------|------------|------|------|------|-------|---------------|
| 459.1449 | 459.1457   | -0.8 | -1.7 | 21.5 | 2.9   | C28 H19 N4 O3 |

Handwritten signature/initials

Elemental Composition Report

Single Mass Analysis

Tolerance = 5.0 PPM / DBE: min = -1.0, max = 80.0  
 Element prediction: Off  
 Number of isotope peaks used for i-FIT = 3

Monoisotopic Mass, Even Electron Ions  
 112 formula(e) evaluated with 1 results within limits (up to 4 best isotopic matches for each mass)  
 Elements Used:

C: 0-35 H: 0-45 N: 0-5 O: 0-4  
 BPPC4-HE-001  
 UT1010\_265 16 (0.360) Cm (13:20-56.65)

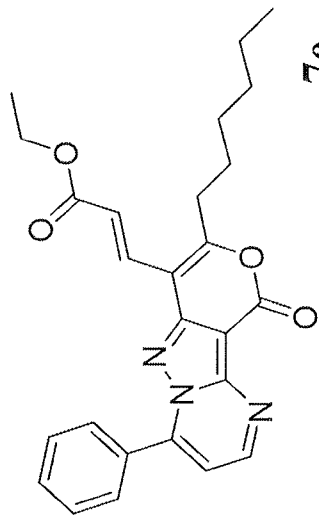

1: TOF MS ES+  
 1.32e+00.

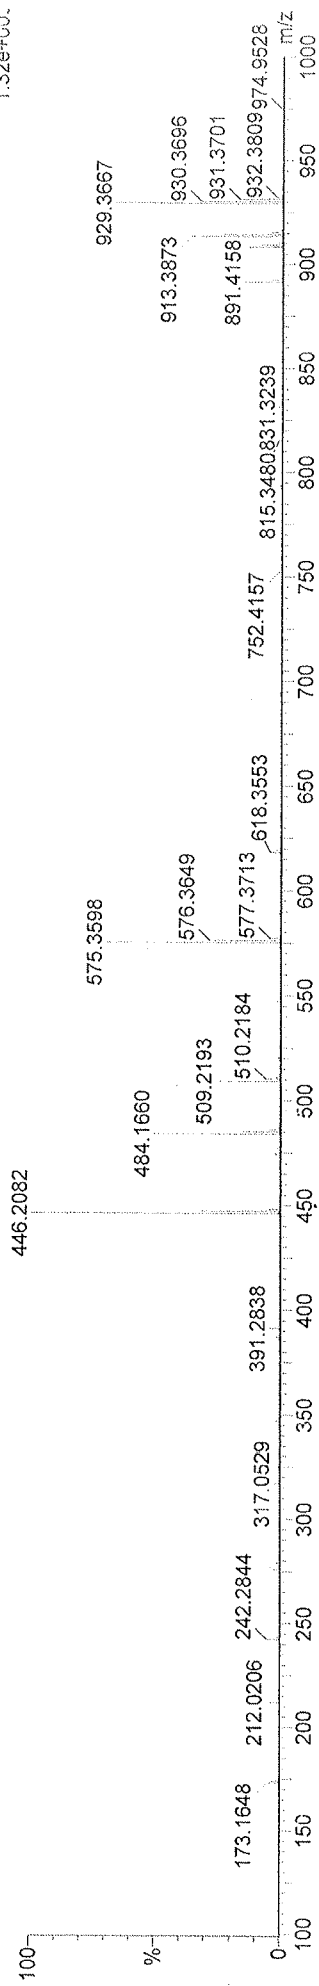

| Mass     | Calc. Mass | mDa | PPM | DBE  | i-FIT | Formula       |
|----------|------------|-----|-----|------|-------|---------------|
| 446.2082 | 446.2080   | 0.2 | 0.4 | 14.5 | 0.9   | C26 H28 N3 O4 |

Minimum: -1.0  
 Maximum: 80.0



### Elemental Composition Report

#### Single Mass Analysis

Tolerance = 10.0 PPM / DBE: min = -1.0, max = 80.0  
 Element prediction: Off  
 Number of isotope peaks used for i-FIT = 3

Monoisotopic Mass, Even Electron Ions  
 99 formula(e) evaluated with 1 results within limits (up to 4 best isotopic matches for each mass)  
 Elements Used:  
 C: 0-35 H: 0-45 N: 0-5 O: 0-4  
 BPPC4-HE-002  
 UT1010\_264 16 (0.360) Cm (16:20-58:64)

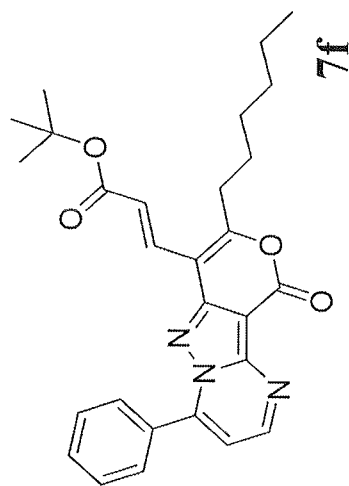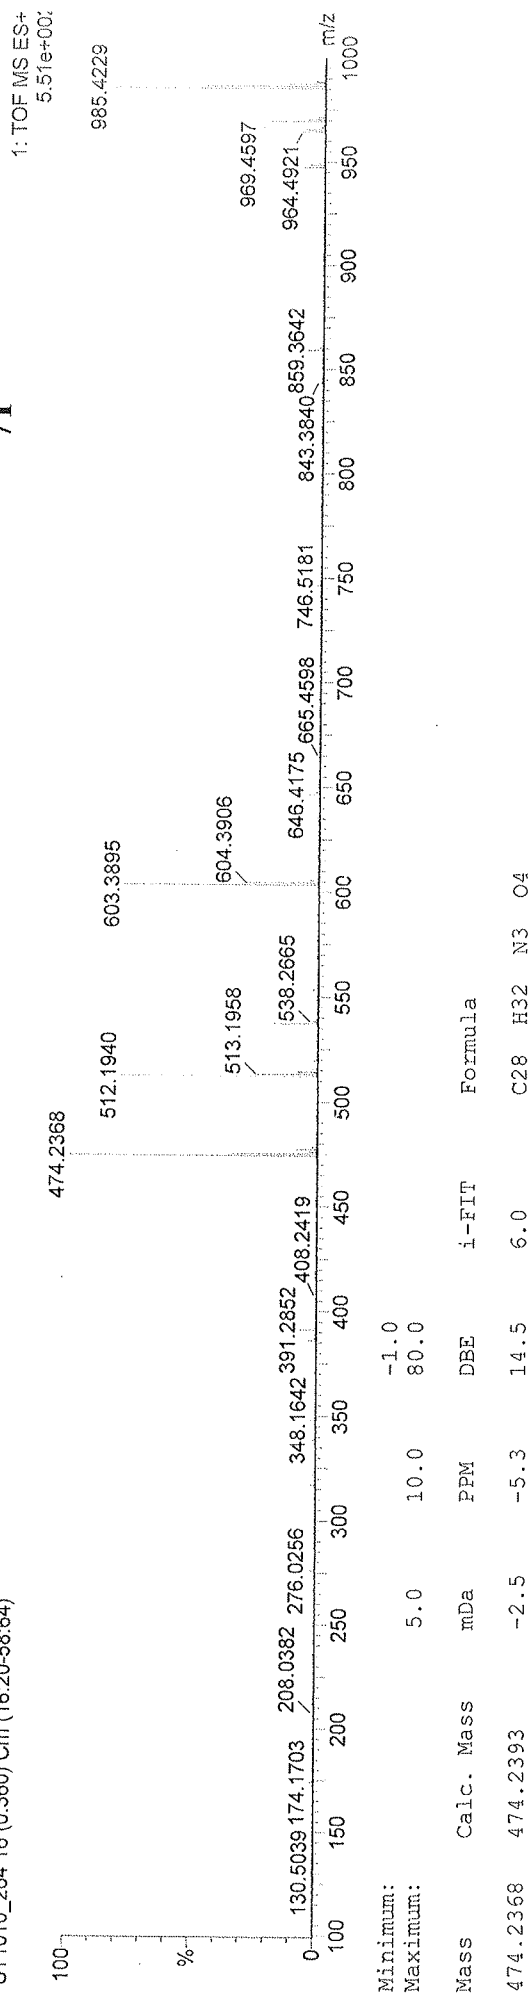

CPS,MIYAPUR

# Mass Analysis Report

|                 |              |                        |              |
|-----------------|--------------|------------------------|--------------|
| Data Filename   | 110224017.d  | Sample Name            | BPPC4/SU/003 |
| Sample Type     | Sample       | Position               | Vial 61      |
| Instrument Name | Instrument 1 | User Name              |              |
| Acq Method      | ESI.m        | IRM Calibration Status | Success      |
| DA Method       | CDD-MRM.m    | Comment                |              |

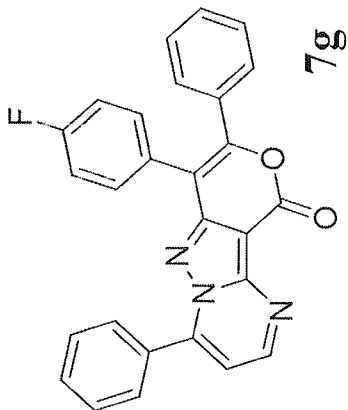

## User Spectra

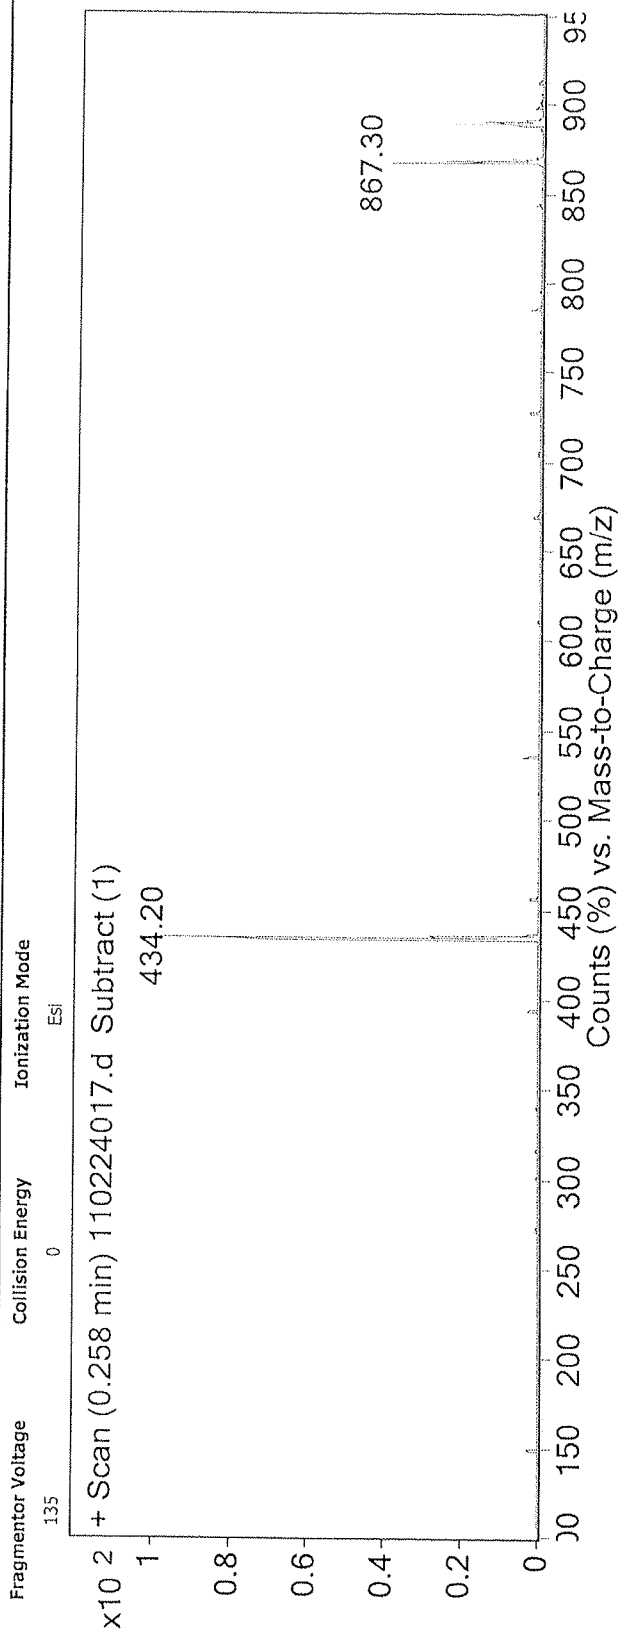

--- End Of Report ---

*Bohler*  
24/02/20

CPS:MIYAPUR

# Mass Analysis Report

|                 |              |                        |             |
|-----------------|--------------|------------------------|-------------|
| Data Filename   | 110503034.d  | Sample Name            | BPPC/SU/004 |
| Sample Type     | Sample       | Position               | Vial 60     |
| Instrument Name | Instrument 1 | User Name              | Success     |
| Acq Method      | ESI.m        | IRM Calibration Status |             |
| DA Method       | Default.m    | Comment                |             |

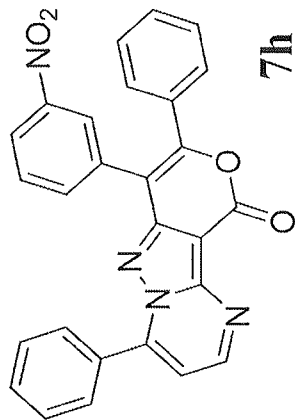

## User Spectra

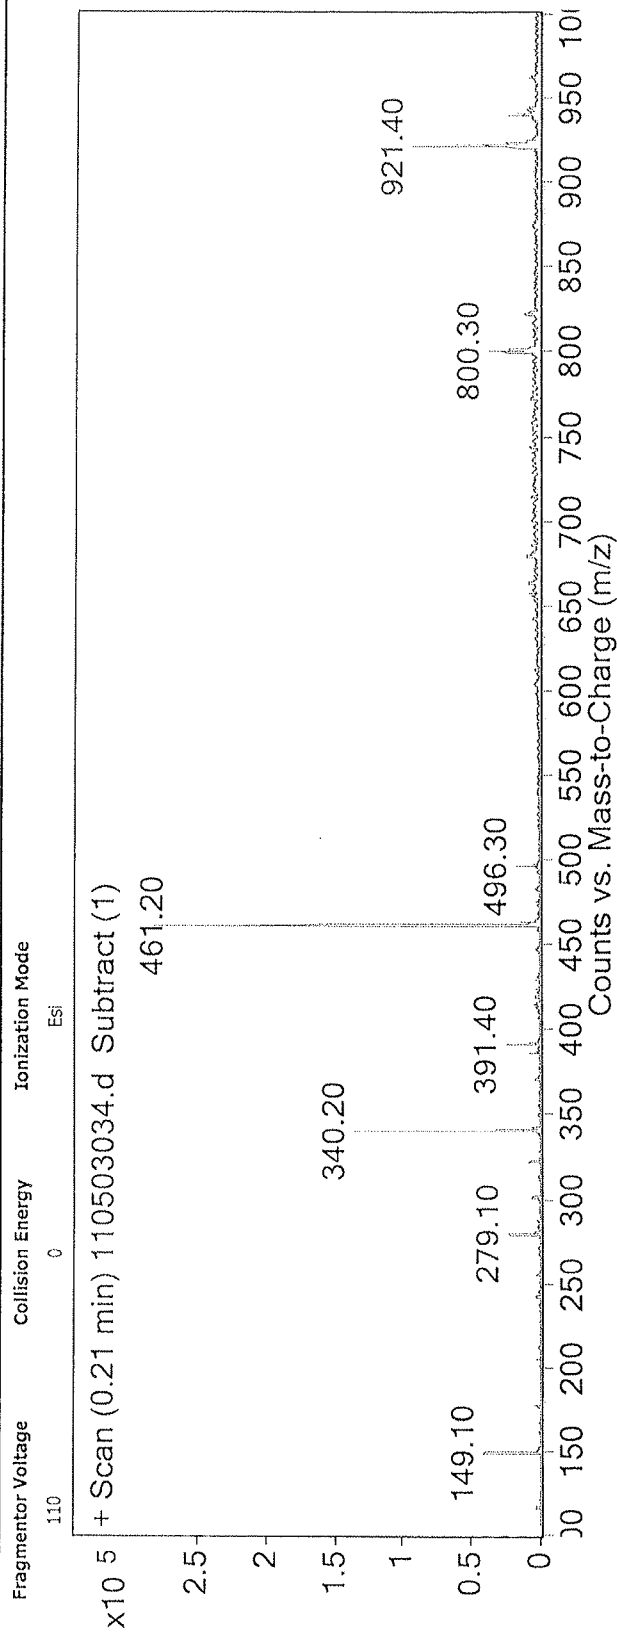

--- End Of Report ---

*6028*  
*05/05/2011*

CPS,MIYAPUR

# Mass Analysis Report

|                 |              |                        |             |
|-----------------|--------------|------------------------|-------------|
| Data Filename   | 110307005.d  | Sample Name            | BPPC/SU/005 |
| Sample Type     | Sample       | Position               | Vial 15     |
| Instrument Name | Instrument 1 | User Name              |             |
| Acq Method      | ESI.m        | IRM Calibration Status | Success     |
| DA Method       | CDD-MRM.m    | Comment                |             |

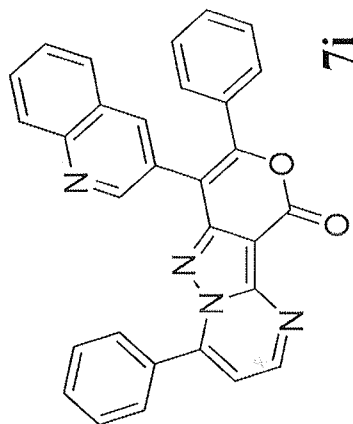

## User Spectra

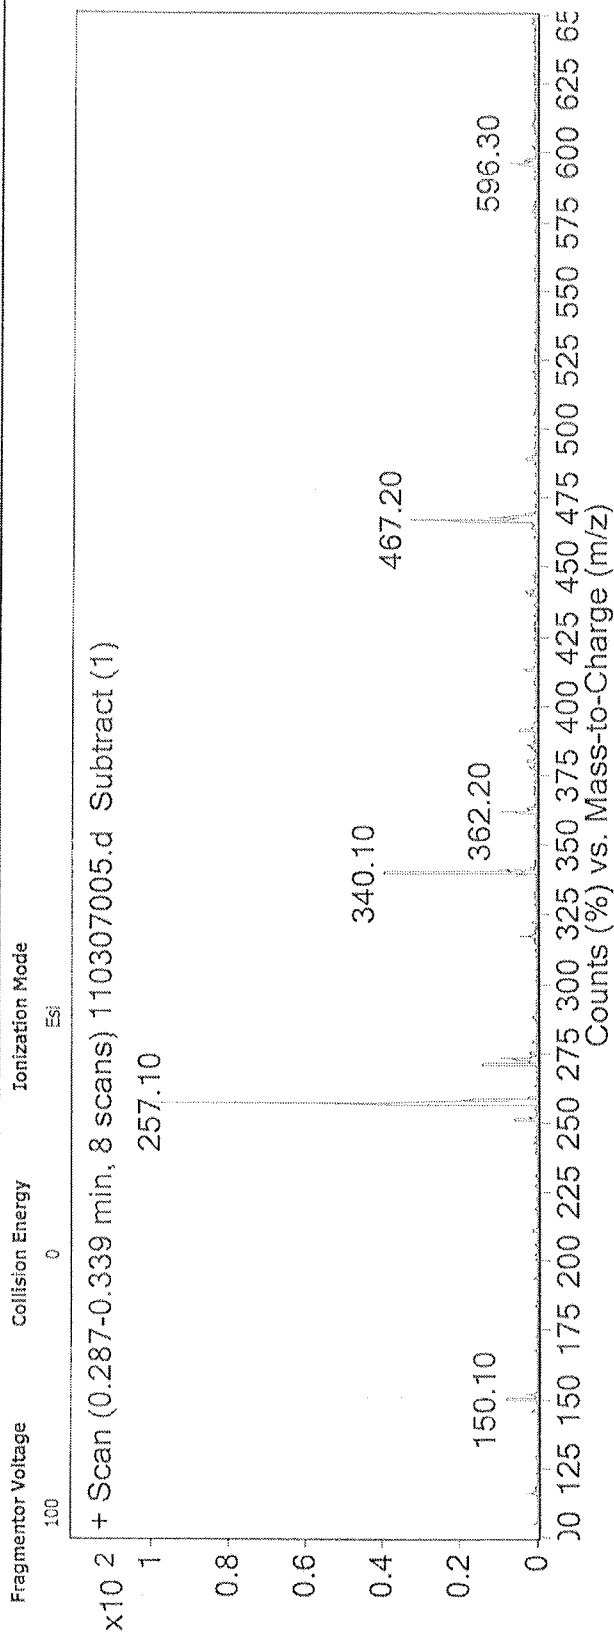

--- End Of Report ---

*Bob*  
07/03/2011
